# Supplementary material for: The ‘ForensOMICS’ approach for postmortem interval estimation from human bone by integrating metabolomics, lipidomics, and proteomics
Source: eLife. 2022 Dec 30;11:e83658. doi: 10.7554/eLife.83658 (PMC9803353; doi:10.7554/eLife.83658)
Supplement: Supplementary file 1. [file elife-83658-supp1.xlsx]

## Sheet: Metab_KW
variable	n	statistic	df	p	method	p.signif
Î±-Eleostearic acid	24	16.275	4	0.00267	Kruskal-Wallis	**
Î±-Lactose	24	10.7283	4	0.0298	Kruskal-Wallis	*
(+/-)12(13)-DiHOME	24	18.2667	4	0.00109	Kruskal-Wallis	**
(+/-)13-HODE	24	18.9933	4	0.000788	Kruskal-Wallis	***
(+/-)9-HpODE	24	19.98	4	0.000504	Kruskal-Wallis	***
15-Octadecenoic acid	24	19.1467	4	0.000735	Kruskal-Wallis	***
Cyclohexaneacetic acid	24	9.26167	4	0.0549	Kruskal-Wallis	ns
10-Hydroxydecanoic acid	24	8.24833	4	0.0829	Kruskal-Wallis	ns
10-Nitrolinoleate	24	7.68833	4	0.104	Kruskal-Wallis	ns
11-Dehydro thromboxane B2	24	12.075	4	0.0168	Kruskal-Wallis	*
11-Î²-Hydroxy-17-methyltestosterone	24	9.71333	4	0.0455	Kruskal-Wallis	*
11(Z)-Eicosenoic acid	24	15.195	4	0.00431	Kruskal-Wallis	**
11(Z),14(Z)-Eicosadienoic acid	24	17.3133	4	0.00168	Kruskal-Wallis	**
12-Aminododecanoic acid	24	19.28	4	0.000692	Kruskal-Wallis	***
12-Hydroxydodecanoic acid	24	18.4333	4	0.00102	Kruskal-Wallis	**
12-Oxo leukotriene B4	24	19.0483	4	0.000769	Kruskal-Wallis	***
13,14-Dihydro-15-keto Prostaglandin A2	24	13.4733	4	0.00918	Kruskal-Wallis	**
13,14-dihydro-15-keto-tetranor Prostaglandin D2	24	12.1683	4	0.0161	Kruskal-Wallis	*
13(S)-Hydroperoxylinolenic acid	24	4.55333	4	0.336	Kruskal-Wallis	ns
16-Hydroxyhexadecanoic acid	24	13.4883	4	0.00912	Kruskal-Wallis	**
Acetamide	24	19.1017	4	0.000751	Kruskal-Wallis	***
2,3-Dinor prostaglandin E1	24	18.2467	4	0.0011	Kruskal-Wallis	**
3-Hydroxybutyric acid	24	6.72	4	0.151	Kruskal-Wallis	ns
3-Hydroxydecanoic acid	24	15.9533	4	0.00308	Kruskal-Wallis	**
3-Indoxyl sulphate	24	12.2133	4	0.0158	Kruskal-Wallis	*
4-Acetamidobutanoic acid	24	17.7067	4	0.00141	Kruskal-Wallis	**
4-Dodecylbenzenesulfonic acid	24	15.235	4	0.00424	Kruskal-Wallis	**
4-Guanidinobutyric acid	24	17.8467	4	0.00132	Kruskal-Wallis	**
4-Hydroxybenzaldehyde	24	16.7683	4	0.00214	Kruskal-Wallis	**
4-Oxoproline	24	9.92833	4	0.0417	Kruskal-Wallis	*
4-Piperidinecarboxamide	24	19.74	4	0.000562	Kruskal-Wallis	***
5-Nitroindoline	24	16.2617	4	0.00269	Kruskal-Wallis	**
8-iso-13,14-dihydro-15-keto Prostaglandin F2	24	17.4267	4	0.0016	Kruskal-Wallis	**
8(S)-Hydroxy-(5Z,9E,11Z,14Z)-eicosatetraenoic acid	24	16.9933	4	0.00194	Kruskal-Wallis	**
9-Oxo-ODE	24	9.435	4	0.0511	Kruskal-Wallis	ns
Acetyl-beta-methylcholine	24	16.66	4	0.00225	Kruskal-Wallis	**
Acetyl-L-carnitine	24	5.42	4	0.247	Kruskal-Wallis	ns
Acetylarginine	24	16.8933	4	0.00203	Kruskal-Wallis	**
Acetylcholine	24	13.6483	4	0.00851	Kruskal-Wallis	**
Adenine	24	12.6733	4	0.013	Kruskal-Wallis	*
Adenosine	24	17.0733	4	0.00187	Kruskal-Wallis	**
Adrenic acid	24	14.9817	4	0.00474	Kruskal-Wallis	**
Arachidonic acid	24	17.8733	4	0.00131	Kruskal-Wallis	**
Azelaic acid	24	7.16833	4	0.127	Kruskal-Wallis	ns
Caprolactam	24	12.7733	4	0.0124	Kruskal-Wallis	*
CAPSO	24	18.88	4	0.00083	Kruskal-Wallis	***
Choline	24	13.3683	4	0.00961	Kruskal-Wallis	**
Corchorifatty acid F	24	19.7133	4	0.000569	Kruskal-Wallis	***
Creatine	24	17.9267	4	0.00128	Kruskal-Wallis	**
Creatinine	24	19.7133	4	0.000569	Kruskal-Wallis	***
Dodecanoic acid	24	8.11333	4	0.0875	Kruskal-Wallis	ns
L,L-Cyclo(leucylprolyl)	24	15.555	4	0.00368	Kruskal-Wallis	**
Cytosine	24	7.74167	4	0.102	Kruskal-Wallis	ns
D-(+)-Galactose	24	13.44	4	0.00931	Kruskal-Wallis	**
D-(+)-Proline	24	16.7467	4	0.00216	Kruskal-Wallis	**
Desthiobiotin	24	10.1417	4	0.0381	Kruskal-Wallis	*
Didecyldimethylammonium	24	14.715	4	0.00533	Kruskal-Wallis	**
DL-Î±-Leucine	24	17.34	4	0.00166	Kruskal-Wallis	**
DL-Mandelic acid	24	8.53333	4	0.0739	Kruskal-Wallis	ns
DL-Metanephrine	24	14.1133	4	0.00694	Kruskal-Wallis	**
Docosahexaenoic acid	24	18.7267	4	0.000889	Kruskal-Wallis	***
Dodecyl sulfate	24	16.68	4	0.00223	Kruskal-Wallis	**
Ethyl palmitoleate	24	15.5017	4	0.00377	Kruskal-Wallis	**
Glycylproline	24	14.0083	4	0.00727	Kruskal-Wallis	**
Guanine	24	14.16	4	0.0068	Kruskal-Wallis	**
Hexadecanedioic acid	24	17.0933	4	0.00185	Kruskal-Wallis	**
Hypoxanthine	24	19.42	4	0.00065	Kruskal-Wallis	***
Kynurenic acid	24	14.0217	4	0.00723	Kruskal-Wallis	**
L-Norleucine	24	13.3017	4	0.00989	Kruskal-Wallis	**
L-Phenylalanine	24	14.9133	4	0.00488	Kruskal-Wallis	**
Linoleic acid	24	19.4483	4	0.000642	Kruskal-Wallis	***
Methylimidazoleacetic acid	24	17.7067	4	0.00141	Kruskal-Wallis	**
Methylmalonic acid	24	16.6483	4	0.00226	Kruskal-Wallis	**
Mono(2-ethylhexyl) phthalate	24	16.2867	4	0.00266	Kruskal-Wallis	**
Monobutyl phthalate	24	18.6883	4	0.000905	Kruskal-Wallis	***
N-Acetylhistamine	24	8.82167	4	0.0657	Kruskal-Wallis	ns
N-Isovalerylglycine	24	10.96	4	0.027	Kruskal-Wallis	*
N-Methylnicotinamide	24	16.7	4	0.00221	Kruskal-Wallis	**
N-Phenylacetylglutamine	24	15.915	4	0.00314	Kruskal-Wallis	**
N,N-Diethylethanolamine	24	19.5533	4	0.000612	Kruskal-Wallis	***
N,N'-Diphenylguanidine	24	11.2217	4	0.0242	Kruskal-Wallis	*
D-Neopterin	24	19.7533	4	0.000559	Kruskal-Wallis	***
Nicotinamide	24	7.86167	4	0.0968	Kruskal-Wallis	ns
Nootkatone	24	11.4533	4	0.0219	Kruskal-Wallis	*
Norbutorphanol	24	14.6133	4	0.00557	Kruskal-Wallis	**
Oleic acid	24	17.6333	4	0.00146	Kruskal-Wallis	**
Ostruthin	24	14.5283	4	0.00579	Kruskal-Wallis	**
Palmitic acid	24	10.595	4	0.0315	Kruskal-Wallis	*
Palmitoleic acid	24	14.2083	4	0.00666	Kruskal-Wallis	**
Palmitoyl ethanolamide	24	19.98	4	0.000504	Kruskal-Wallis	***
Palmitoyl sphingomyelin	24	8.14	4	0.0866	Kruskal-Wallis	ns
Prolinamide	24	17.3133	4	0.00168	Kruskal-Wallis	**
Prolylglycine	24	18.6467	4	0.000922	Kruskal-Wallis	***
Prolylleucine	24	16.3683	4	0.00256	Kruskal-Wallis	**
Sedanolide	24	18.4	4	0.00103	Kruskal-Wallis	**
Stearic acid	24	1.955	4	0.744	Kruskal-Wallis	ns
Taurine	24	19.2267	4	0.000709	Kruskal-Wallis	***
Tetranor-12R-HETE	24	19.2483	4	0.000702	Kruskal-Wallis	***
trans-10-Heptadecenoic acid	24	10.6483	4	0.0308	Kruskal-Wallis	*
trans-Petroselinic acid	24	16.5417	4	0.00237	Kruskal-Wallis	**
Triethanolamine	24	17.1283	4	0.00183	Kruskal-Wallis	**
Uracil	24	19.8733	4	0.000529	Kruskal-Wallis	***
Urocanic acid	24	14.1133	4	0.00694	Kruskal-Wallis	**
Xanthine	24	7.54667	4	0.11	Kruskal-Wallis	ns

## Sheet: Metab_Dunn
variable	group1	group2	statistic	p	p.adj	p.adj.signif
Î±-Eleostearic acid	2-10days	219days	2.5743	0.0100444	0.0843729	ns
Î±-Eleostearic acid	2-10days	790days	-0.0547723	0.95632	1	ns
Î±-Eleostearic acid	2-10days	834days	1.69794	0.0895191	0.537115	ns
Î±-Eleostearic acid	2-10days	872days	3.23156	0.00123115	0.0123115	*
Î±-Eleostearic acid	219days	790days	-2.07846	0.0376669	0.263668	ns
Î±-Eleostearic acid	219days	834days	-0.69282	0.488422	1	ns
Î±-Eleostearic acid	219days	872days	0.519615	0.603332	1	ns
Î±-Eleostearic acid	790days	834days	1.38564	0.165857	0.829283	ns
Î±-Eleostearic acid	790days	872days	2.59808	0.00937477	0.0843729	ns
Î±-Eleostearic acid	834days	872days	1.21244	0.225346	0.901383	ns
Î±-Lactose	2-10days	219days	2.42824	0.0151724	0.136552	ns
Î±-Lactose	2-10days	790days	-0.0547723	0.95632	1	ns
Î±-Lactose	2-10days	834days	1.18673	0.235333	1	ns
Î±-Lactose	2-10days	872days	-1.36931	0.170904	1	ns
Î±-Lactose	219days	790days	-1.96299	0.0496472	0.347531	ns
Î±-Lactose	219days	834days	-0.981495	0.326348	1	ns
Î±-Lactose	219days	872days	-3.00222	0.00268017	0.0268017	*
Î±-Lactose	790days	834days	0.981495	0.326348	1	ns
Î±-Lactose	790days	872days	-1.03923	0.298698	1	ns
Î±-Lactose	834days	872days	-2.02073	0.0433081	0.346465	ns
(+/-)12(13)-DiHOME	2-10days	219days	-2.33695	0.0194418	0.116651	ns
(+/-)12(13)-DiHOME	2-10days	790days	-1.89877	0.0575945	0.287973	ns
(+/-)12(13)-DiHOME	2-10days	834days	-2.40998	0.0159534	0.111674	ns
(+/-)12(13)-DiHOME	2-10days	872days	1.67968	0.0930191	0.372076	ns
(+/-)12(13)-DiHOME	219days	790days	0.34641	0.729034	1	ns
(+/-)12(13)-DiHOME	219days	834days	-0.057735	0.95396	1	ns
(+/-)12(13)-DiHOME	219days	872days	3.17543	0.00149616	0.0134655	*
(+/-)12(13)-DiHOME	790days	834days	-0.404145	0.686106	1	ns
(+/-)12(13)-DiHOME	790days	872days	2.82902	0.00466913	0.0373531	*
(+/-)12(13)-DiHOME	834days	872days	3.23316	0.00122428	0.0122428	*
(+/-)13-HODE	2-10days	219days	-2.37346	0.0176221	0.105733	ns
(+/-)13-HODE	2-10days	790days	-2.08135	0.0374023	0.187011	ns
(+/-)13-HODE	2-10days	834days	-2.44649	0.0144253	0.100977	ns
(+/-)13-HODE	2-10days	872days	1.64317	0.100348	0.401393	ns
(+/-)13-HODE	219days	790days	0.23094	0.817361	1	ns
(+/-)13-HODE	219days	834days	-0.057735	0.95396	1	ns
(+/-)13-HODE	219days	872days	3.17543	0.00149616	0.0134655	*
(+/-)13-HODE	790days	834days	-0.288675	0.77283	1	ns
(+/-)13-HODE	790days	872days	2.94449	0.00323491	0.0258793	*
(+/-)13-HODE	834days	872days	3.23316	0.00122428	0.0122428	*
(+/-)9-HpODE	2-10days	219days	-2.30043	0.0214236	0.128542	ns
(+/-)9-HpODE	2-10days	790days	-1.64317	0.100348	0.501741	ns
(+/-)9-HpODE	2-10days	834days	-2.9577	0.00309942	0.0247953	*
(+/-)9-HpODE	2-10days	872days	1.64317	0.100348	0.501741	ns
(+/-)9-HpODE	219days	790days	0.519615	0.603332	1	ns
(+/-)9-HpODE	219days	834days	-0.519615	0.603332	1	ns
(+/-)9-HpODE	219days	872days	3.11769	0.00182274	0.0164046	*
(+/-)9-HpODE	790days	834days	-1.03923	0.298698	0.896093	ns
(+/-)9-HpODE	790days	872days	2.59808	0.00937477	0.0656234	ns
(+/-)9-HpODE	834days	872days	3.63731	0.000275504	0.00275504	**
15-Octadecenoic acid	2-10days	219days	-2.62907	0.00856192	0.0684953	ns
15-Octadecenoic acid	2-10days	790days	-1.46059	0.144127	0.576508	ns
15-Octadecenoic acid	2-10days	834days	-2.55604	0.0105871	0.07411	ns
15-Octadecenoic acid	2-10days	872days	1.67968	0.0930191	0.465096	ns
15-Octadecenoic acid	219days	790days	0.92376	0.355611	1	ns
15-Octadecenoic acid	219days	834days	0.057735	0.95396	1	ns
15-Octadecenoic acid	219days	872days	3.40637	0.000658337	0.00658337	**
15-Octadecenoic acid	790days	834days	-0.866025	0.386476	1	ns
15-Octadecenoic acid	790days	872days	2.48261	0.0130425	0.0782551	ns
15-Octadecenoic acid	834days	872days	3.34863	0.000812117	0.00730905	**
Cyclohexaneacetic acid	2-10days	219days	-2.50127	0.012375	0.12375	ns
Cyclohexaneacetic acid	2-10days	790days	-2.13612	0.0326698	0.294028	ns
Cyclohexaneacetic acid	2-10days	834days	-1.1137	0.265407	1	ns
Cyclohexaneacetic acid	2-10days	872days	-0.529465	0.596483	1	ns
Cyclohexaneacetic acid	219days	790days	0.288675	0.77283	1	ns
Cyclohexaneacetic acid	219days	834days	1.09697	0.272656	1	ns
Cyclohexaneacetic acid	219days	872days	1.55885	0.119033	0.952263	ns
Cyclohexaneacetic acid	790days	834days	0.80829	0.418923	1	ns
Cyclohexaneacetic acid	790days	872days	1.27017	0.204024	1	ns
Cyclohexaneacetic acid	834days	872days	0.46188	0.644167	1	ns
10-Hydroxydecanoic acid	2-10days	219days	-1.25976	0.207755	1	ns
10-Hydroxydecanoic acid	2-10days	790days	-2.13612	0.0326698	0.326698	ns
10-Hydroxydecanoic acid	2-10days	834days	-1.91703	0.0552343	0.497108	ns
10-Hydroxydecanoic acid	2-10days	872days	0.200832	0.84083	1	ns
10-Hydroxydecanoic acid	219days	790days	-0.69282	0.488422	1	ns
10-Hydroxydecanoic acid	219days	834days	-0.519615	0.603332	1	ns
10-Hydroxydecanoic acid	219days	872days	1.1547	0.248213	1	ns
10-Hydroxydecanoic acid	790days	834days	0.173205	0.86249	1	ns
10-Hydroxydecanoic acid	790days	872days	1.84752	0.0646717	0.517374	ns
10-Hydroxydecanoic acid	834days	872days	1.67432	0.0940686	0.65848	ns
10-Nitrolinoleate	2-10days	219days	0.200832	0.84083	1	ns
10-Nitrolinoleate	2-10days	790days	-0.237346	0.812388	1	ns
10-Nitrolinoleate	2-10days	834days	-0.0912871	0.927264	1	ns
10-Nitrolinoleate	2-10days	872days	2.61081	0.00903278	0.0903278	ns
10-Nitrolinoleate	219days	790days	-0.34641	0.729034	1	ns
10-Nitrolinoleate	219days	834days	-0.23094	0.817361	1	ns
10-Nitrolinoleate	219days	872days	1.90526	0.0567468	0.397228	ns
10-Nitrolinoleate	790days	834days	0.11547	0.908073	1	ns
10-Nitrolinoleate	790days	872days	2.25167	0.0243434	0.21909	ns
10-Nitrolinoleate	834days	872days	2.1362	0.0326634	0.261308	ns
11-Dehydro thromboxane B2	2-10days	219days	-0.712039	0.47644	1	ns
11-Dehydro thromboxane B2	2-10days	790days	-1.80748	0.0706868	0.494807	ns
11-Dehydro thromboxane B2	2-10days	834days	0.602495	0.546845	1	ns
11-Dehydro thromboxane B2	2-10days	872days	-2.90293	0.0036969	0.036969	*
11-Dehydro thromboxane B2	219days	790days	-0.866025	0.386476	1	ns
11-Dehydro thromboxane B2	219days	834days	1.03923	0.298698	1	ns
11-Dehydro thromboxane B2	219days	872days	-1.73205	0.0832645	0.499587	ns
11-Dehydro thromboxane B2	790days	834days	1.90526	0.0567468	0.453975	ns
11-Dehydro thromboxane B2	790days	872days	-0.866025	0.386476	1	ns
11-Dehydro thromboxane B2	834days	872days	-2.77128	0.00558362	0.0502526	ns
11-Î²-Hydroxy-17-methyltestosterone	2-10days	219days	0.401663	0.687932	1	ns
11-Î²-Hydroxy-17-methyltestosterone	2-10days	790days	-1.7162	0.0861259	0.602882	ns
11-Î²-Hydroxy-17-methyltestosterone	2-10days	834days	-0.255604	0.798257	1	ns
11-Î²-Hydroxy-17-methyltestosterone	2-10days	872days	2.15438	0.0312107	0.280897	ns
11-Î²-Hydroxy-17-methyltestosterone	219days	790days	-1.67432	0.0940686	0.602882	ns
11-Î²-Hydroxy-17-methyltestosterone	219days	834days	-0.519615	0.603332	1	ns
11-Î²-Hydroxy-17-methyltestosterone	219days	872days	1.38564	0.165857	0.829283	ns
11-Î²-Hydroxy-17-methyltestosterone	790days	834days	1.1547	0.248213	0.992852	ns
11-Î²-Hydroxy-17-methyltestosterone	790days	872days	3.05996	0.00221369	0.0221369	*
11-Î²-Hydroxy-17-methyltestosterone	834days	872days	1.90526	0.0567468	0.453975	ns
11(Z)-Eicosenoic acid	2-10days	219days	-2.24566	0.0247256	0.148354	ns
11(Z)-Eicosenoic acid	2-10days	790days	1.04067	0.298027	0.901383	ns
11(Z)-Eicosenoic acid	2-10days	834days	-0.712039	0.47644	0.901383	ns
11(Z)-Eicosenoic acid	2-10days	872days	2.35521	0.0185124	0.129587	ns
11(Z)-Eicosenoic acid	219days	790days	2.59808	0.00937477	0.0843729	ns
11(Z)-Eicosenoic acid	219days	834days	1.21244	0.225346	0.901383	ns
11(Z)-Eicosenoic acid	219days	872days	3.63731	0.000275504	0.00275504	**
11(Z)-Eicosenoic acid	790days	834days	-1.38564	0.165857	0.829283	ns
11(Z)-Eicosenoic acid	790days	872days	1.03923	0.298698	0.901383	ns
11(Z)-Eicosenoic acid	834days	872days	2.42487	0.0153138	0.122511	ns
11(Z),14(Z)-Eicosadienoic acid	2-10days	219days	-2.00832	0.0446097	0.187264	ns
11(Z),14(Z)-Eicosadienoic acid	2-10days	790days	0.839841	0.400997	0.896093	ns
11(Z),14(Z)-Eicosadienoic acid	2-10days	834days	-2.15438	0.0312107	0.187264	ns
11(Z),14(Z)-Eicosadienoic acid	2-10days	872days	2.15438	0.0312107	0.187264	ns
11(Z),14(Z)-Eicosadienoic acid	219days	790days	2.25167	0.0243434	0.170404	ns
11(Z),14(Z)-Eicosadienoic acid	219days	834days	-0.11547	0.908073	0.908073	ns
11(Z),14(Z)-Eicosadienoic acid	219days	872days	3.2909	0.000998686	0.00898818	**
11(Z),14(Z)-Eicosadienoic acid	790days	834days	-2.36714	0.0179263	0.143411	ns
11(Z),14(Z)-Eicosadienoic acid	790days	872days	1.03923	0.298698	0.896093	ns
11(Z),14(Z)-Eicosadienoic acid	834days	872days	3.40637	0.000658337	0.00658337	**
12-Aminododecanoic acid	2-10days	219days	2.92119	0.003487	0.031383	*
12-Aminododecanoic acid	2-10days	790days	1.53362	0.125122	0.750734	ns
12-Aminododecanoic acid	2-10days	834days	2.19089	0.0284597	0.227678	ns
12-Aminododecanoic acid	2-10days	872days	3.57845	0.000345633	0.00345633	**
12-Aminododecanoic acid	219days	790days	-1.09697	0.272656	1	ns
12-Aminododecanoic acid	219days	834days	-0.57735	0.563703	1	ns
12-Aminododecanoic acid	219days	872days	0.519615	0.603332	1	ns
12-Aminododecanoic acid	790days	834days	0.519615	0.603332	1	ns
12-Aminododecanoic acid	790days	872days	1.61658	0.105969	0.741782	ns
12-Aminododecanoic acid	834days	872days	1.09697	0.272656	1	ns
12-Hydroxydodecanoic acid	2-10days	219days	2.44649	0.0144253	0.115403	ns
12-Hydroxydodecanoic acid	2-10days	790days	2.59255	0.00952664	0.0857397	ns
12-Hydroxydodecanoic acid	2-10days	834days	1.35105	0.17668	1	ns
12-Hydroxydodecanoic acid	2-10days	872days	3.54194	0.000397197	0.00397197	**
12-Hydroxydodecanoic acid	219days	790days	0.11547	0.908073	1	ns
12-Hydroxydodecanoic acid	219days	834days	-0.866025	0.386476	1	ns
12-Hydroxydodecanoic acid	219days	872days	0.866025	0.386476	1	ns
12-Hydroxydodecanoic acid	790days	834days	-0.981495	0.326348	1	ns
12-Hydroxydodecanoic acid	790days	872days	0.750555	0.45292	1	ns
12-Hydroxydodecanoic acid	834days	872days	1.73205	0.0832645	0.582852	ns
12-Oxo leukotriene B4	2-10days	219days	-2.28218	0.0224789	0.134873	ns
12-Oxo leukotriene B4	2-10days	790days	-1.77097	0.0765658	0.382829	ns
12-Oxo leukotriene B4	2-10days	834days	-3.01247	0.00259128	0.0233215	*
12-Oxo leukotriene B4	2-10days	872days	1.36931	0.170904	0.683614	ns
12-Oxo leukotriene B4	219days	790days	0.404145	0.686106	1	ns
12-Oxo leukotriene B4	219days	834days	-0.57735	0.563703	1	ns
12-Oxo leukotriene B4	219days	872days	2.88675	0.00389242	0.0311393	*
12-Oxo leukotriene B4	790days	834days	-0.981495	0.326348	0.979045	ns
12-Oxo leukotriene B4	790days	872days	2.48261	0.0130425	0.0912976	ns
12-Oxo leukotriene B4	834days	872days	3.4641	0.000532006	0.00532006	**
13,14-Dihydro-15-keto Prostaglandin A2	2-10days	219days	2.00832	0.0446097	0.356878	ns
13,14-Dihydro-15-keto Prostaglandin A2	2-10days	790days	-0.182574	0.855132	1	ns
13,14-Dihydro-15-keto Prostaglandin A2	2-10days	834days	1.49711	0.134365	0.80619	ns
13,14-Dihydro-15-keto Prostaglandin A2	2-10days	872days	3.10376	0.00191078	0.0191078	*
13,14-Dihydro-15-keto Prostaglandin A2	219days	790days	-1.73205	0.0832645	0.582852	ns
13,14-Dihydro-15-keto Prostaglandin A2	219days	834days	-0.404145	0.686106	1	ns
13,14-Dihydro-15-keto Prostaglandin A2	219days	872days	0.866025	0.386476	1	ns
13,14-Dihydro-15-keto Prostaglandin A2	790days	834days	1.32791	0.184209	0.921046	ns
13,14-Dihydro-15-keto Prostaglandin A2	790days	872days	2.59808	0.00937477	0.0843729	ns
13,14-Dihydro-15-keto Prostaglandin A2	834days	872days	1.27017	0.204024	0.921046	ns
13,14-dihydro-15-keto-tetranor Prostaglandin D2	2-10days	219days	-0.63901	0.522817	1	ns
13,14-dihydro-15-keto-tetranor Prostaglandin D2	2-10days	790days	-1.66143	0.0966281	0.582852	ns
13,14-dihydro-15-keto-tetranor Prostaglandin D2	2-10days	834days	0.894614	0.370994	1	ns
13,14-dihydro-15-keto-tetranor Prostaglandin D2	2-10days	872days	-2.8299	0.00465626	0.0419063	*
13,14-dihydro-15-keto-tetranor Prostaglandin D2	219days	790days	-0.80829	0.418923	1	ns
13,14-dihydro-15-keto-tetranor Prostaglandin D2	219days	834days	1.21244	0.225346	1	ns
13,14-dihydro-15-keto-tetranor Prostaglandin D2	219days	872days	-1.73205	0.0832645	0.582852	ns
13,14-dihydro-15-keto-tetranor Prostaglandin D2	790days	834days	2.02073	0.0433081	0.346465	ns
13,14-dihydro-15-keto-tetranor Prostaglandin D2	790days	872days	-0.92376	0.355611	1	ns
13,14-dihydro-15-keto-tetranor Prostaglandin D2	834days	872days	-2.94449	0.00323491	0.0323491	*
13(S)-Hydroperoxylinolenic acid	2-10days	219days	1.49711	0.134365	1	ns
13(S)-Hydroperoxylinolenic acid	2-10days	790days	-0.985901	0.324182	1	ns
13(S)-Hydroperoxylinolenic acid	2-10days	834days	0.474693	0.635006	1	ns
13(S)-Hydroperoxylinolenic acid	2-10days	872days	0.766812	0.443194	1	ns
13(S)-Hydroperoxylinolenic acid	219days	790days	-1.96299	0.0496472	0.496472	ns
13(S)-Hydroperoxylinolenic acid	219days	834days	-0.80829	0.418923	1	ns
13(S)-Hydroperoxylinolenic acid	219days	872days	-0.57735	0.563703	1	ns
13(S)-Hydroperoxylinolenic acid	790days	834days	1.1547	0.248213	1	ns
13(S)-Hydroperoxylinolenic acid	790days	872days	1.38564	0.165857	1	ns
13(S)-Hydroperoxylinolenic acid	834days	872days	0.23094	0.817361	1	ns
16-Hydroxyhexadecanoic acid	2-10days	219days	-1.66143	0.0966281	0.582852	ns
16-Hydroxyhexadecanoic acid	2-10days	790days	1.33279	0.1826	0.730401	ns
16-Hydroxyhexadecanoic acid	2-10days	834days	0.456435	0.648077	0.976845	ns
16-Hydroxyhexadecanoic acid	2-10days	872days	2.64733	0.00811312	0.0730181	ns
16-Hydroxyhexadecanoic acid	219days	790days	2.36714	0.0179263	0.143411	ns
16-Hydroxyhexadecanoic acid	219days	834days	1.67432	0.0940686	0.582852	ns
16-Hydroxyhexadecanoic acid	219days	872days	3.40637	0.000658337	0.00658337	**
16-Hydroxyhexadecanoic acid	790days	834days	-0.69282	0.488422	0.976845	ns
16-Hydroxyhexadecanoic acid	790days	872days	1.03923	0.298698	0.896093	ns
16-Hydroxyhexadecanoic acid	834days	872days	1.73205	0.0832645	0.582852	ns
Acetamide	2-10days	219days	2.64733	0.00811312	0.0730181	ns
Acetamide	2-10days	790days	1.69794	0.0895191	0.626634	ns
Acetamide	2-10days	834days	2.42824	0.0151724	0.12138	ns
Acetamide	2-10days	872days	3.59671	0.000322266	0.00322266	**
Acetamide	219days	790days	-0.750555	0.45292	1	ns
Acetamide	219days	834days	-0.173205	0.86249	1	ns
Acetamide	219days	872days	0.750555	0.45292	1	ns
Acetamide	790days	834days	0.57735	0.563703	1	ns
Acetamide	790days	872days	1.50111	0.133327	0.799962	ns
Acetamide	834days	872days	0.92376	0.355611	1	ns
2,3-Dinor prostaglandin E1	2-10days	219days	-1.49711	0.134365	0.53746	ns
2,3-Dinor prostaglandin E1	2-10days	790days	-2.73861	0.0061699	0.0493592	*
2,3-Dinor prostaglandin E1	2-10days	834days	-2.15438	0.0312107	0.187264	ns
2,3-Dinor prostaglandin E1	2-10days	872days	1.7162	0.0861259	0.43063	ns
2,3-Dinor prostaglandin E1	219days	790days	-0.981495	0.326348	0.979045	ns
2,3-Dinor prostaglandin E1	219days	834days	-0.519615	0.603332	1	ns
2,3-Dinor prostaglandin E1	219days	872days	2.54034	0.0110744	0.0775211	ns
2,3-Dinor prostaglandin E1	790days	834days	0.46188	0.644167	1	ns
2,3-Dinor prostaglandin E1	790days	872days	3.52184	0.000428568	0.00428568	**
2,3-Dinor prostaglandin E1	834days	872days	3.05996	0.00221369	0.0199232	*
3-Hydroxybutyric acid	2-10days	219days	-1.9718	0.0486323	0.486323	ns
3-Hydroxybutyric acid	2-10days	790days	-1.75271	0.0796514	0.716863	ns
3-Hydroxybutyric acid	2-10days	834days	-1.46059	0.144127	1	ns
3-Hydroxybutyric acid	2-10days	872days	-0.365148	0.715001	1	ns
3-Hydroxybutyric acid	219days	790days	0.173205	0.86249	1	ns
3-Hydroxybutyric acid	219days	834days	0.404145	0.686106	1	ns
3-Hydroxybutyric acid	219days	872days	1.27017	0.204024	1	ns
3-Hydroxybutyric acid	790days	834days	0.23094	0.817361	1	ns
3-Hydroxybutyric acid	790days	872days	1.09697	0.272656	1	ns
3-Hydroxybutyric acid	834days	872days	0.866025	0.386476	1	ns
3-Hydroxydecanoic acid	2-10days	219days	0.620752	0.534763	0.979045	ns
3-Hydroxydecanoic acid	2-10days	790days	2.73861	0.0061699	0.0493592	*
3-Hydroxydecanoic acid	2-10days	834days	-1.7162	0.0861259	0.437968	ns
3-Hydroxydecanoic acid	2-10days	872days	1.86226	0.0625669	0.437968	ns
3-Hydroxydecanoic acid	219days	790days	1.67432	0.0940686	0.437968	ns
3-Hydroxydecanoic acid	219days	834days	-1.84752	0.0646717	0.437968	ns
3-Hydroxydecanoic acid	219days	872days	0.981495	0.326348	0.979045	ns
3-Hydroxydecanoic acid	790days	834days	-3.52184	0.000428568	0.00428568	**
3-Hydroxydecanoic acid	790days	872days	-0.69282	0.488422	0.979045	ns
3-Hydroxydecanoic acid	834days	872days	2.82902	0.00466913	0.0420222	*
3-Indoxyl sulphate	2-10days	219days	-2.7021	0.00689035	0.0689035	ns
3-Indoxyl sulphate	2-10days	790days	-1.38756	0.16527	0.991619	ns
3-Indoxyl sulphate	2-10days	834days	-2.48301	0.0130278	0.11725	ns
3-Indoxyl sulphate	2-10days	872days	-0.146059	0.883875	1	ns
3-Indoxyl sulphate	219days	790days	1.03923	0.298698	1	ns
3-Indoxyl sulphate	219days	834days	0.173205	0.86249	1	ns
3-Indoxyl sulphate	219days	872days	2.02073	0.0433081	0.346465	ns
3-Indoxyl sulphate	790days	834days	-0.866025	0.386476	1	ns
3-Indoxyl sulphate	790days	872days	0.981495	0.326348	1	ns
3-Indoxyl sulphate	834days	872days	1.84752	0.0646717	0.452702	ns
4-Acetamidobutanoic acid	2-10days	219days	-1.82574	0.0678892	0.339446	ns
4-Acetamidobutanoic acid	2-10days	790days	1.46059	0.144127	0.432381	ns
4-Acetamidobutanoic acid	2-10days	834days	1.82574	0.0678892	0.339446	ns
4-Acetamidobutanoic acid	2-10days	872days	-2.33695	0.0194418	0.116651	ns
4-Acetamidobutanoic acid	219days	790days	2.59808	0.00937477	0.0656234	ns
4-Acetamidobutanoic acid	219days	834days	2.88675	0.00389242	0.0311393	*
4-Acetamidobutanoic acid	219days	872days	-0.404145	0.686106	1	ns
4-Acetamidobutanoic acid	790days	834days	0.288675	0.77283	1	ns
4-Acetamidobutanoic acid	790days	872days	-3.00222	0.00268017	0.0241215	*
4-Acetamidobutanoic acid	834days	872days	-3.2909	0.000998686	0.00998686	**
4-Dodecylbenzenesulfonic acid	2-10days	219days	1.99006	0.0465845	0.279507	ns
4-Dodecylbenzenesulfonic acid	2-10days	790days	-0.931128	0.351787	1	ns
4-Dodecylbenzenesulfonic acid	2-10days	834days	1.91703	0.0552343	0.279507	ns
4-Dodecylbenzenesulfonic acid	2-10days	872days	-1.95354	0.0507552	0.279507	ns
4-Dodecylbenzenesulfonic acid	219days	790days	-2.3094	0.0209213	0.167371	ns
4-Dodecylbenzenesulfonic acid	219days	834days	-0.057735	0.95396	1	ns
4-Dodecylbenzenesulfonic acid	219days	872days	-3.11769	0.00182274	0.0182274	*
4-Dodecylbenzenesulfonic acid	790days	834days	2.25167	0.0243434	0.170404	ns
4-Dodecylbenzenesulfonic acid	790days	872days	-0.80829	0.418923	1	ns
4-Dodecylbenzenesulfonic acid	834days	872days	-3.05996	0.00221369	0.0199232	*
4-Guanidinobutyric acid	2-10days	219days	1.78923	0.0735783	0.367891	ns
4-Guanidinobutyric acid	2-10days	790days	2.81164	0.00492893	0.0394314	*
4-Guanidinobutyric acid	2-10days	834days	2.73861	0.0061699	0.0431893	*
4-Guanidinobutyric acid	2-10days	872days	-0.912871	0.36131	1	ns
4-Guanidinobutyric acid	219days	790days	0.80829	0.418923	1	ns
4-Guanidinobutyric acid	219days	834days	0.750555	0.45292	1	ns
4-Guanidinobutyric acid	219days	872days	-2.1362	0.0326634	0.195981	ns
4-Guanidinobutyric acid	790days	834days	-0.057735	0.95396	1	ns
4-Guanidinobutyric acid	790days	872days	-2.94449	0.00323491	0.0323491	*
4-Guanidinobutyric acid	834days	872days	-2.88675	0.00389242	0.0350318	*
4-Hydroxybenzaldehyde	2-10days	219days	0.419921	0.674543	1	ns
4-Hydroxybenzaldehyde	2-10days	790days	1.88051	0.060038	0.38664	ns
4-Hydroxybenzaldehyde	2-10days	834days	2.68384	0.00727818	0.0582255	ns
4-Hydroxybenzaldehyde	2-10days	872days	-1.91703	0.0552343	0.38664	ns
4-Hydroxybenzaldehyde	219days	790days	1.1547	0.248213	0.744639	ns
4-Hydroxybenzaldehyde	219days	834days	1.78979	0.0734883	0.38664	ns
4-Hydroxybenzaldehyde	219days	872days	-1.84752	0.0646717	0.38664	ns
4-Hydroxybenzaldehyde	790days	834days	0.635085	0.525373	1	ns
4-Hydroxybenzaldehyde	790days	872days	-3.00222	0.00268017	0.0241215	*
4-Hydroxybenzaldehyde	834days	872days	-3.63731	0.000275504	0.00275504	**
4-Oxoproline	2-10days	219days	-1.844	0.0651832	0.456283	ns
4-Oxoproline	2-10days	790days	0.200832	0.84083	1	ns
4-Oxoproline	2-10days	834days	-0.237346	0.812388	1	ns
4-Oxoproline	2-10days	872days	-2.64733	0.00811312	0.0811312	ns
4-Oxoproline	219days	790days	1.61658	0.105969	0.635813	ns
4-Oxoproline	219days	834days	1.27017	0.204024	1	ns
4-Oxoproline	219days	872days	-0.635085	0.525373	1	ns
4-Oxoproline	790days	834days	-0.34641	0.729034	1	ns
4-Oxoproline	790days	872days	-2.25167	0.0243434	0.21909	ns
4-Oxoproline	834days	872days	-1.90526	0.0567468	0.453975	ns
4-Piperidinecarboxamide	2-10days	219days	2.73861	0.0061699	0.0493592	*
4-Piperidinecarboxamide	2-10days	790days	1.64317	0.100348	0.501741	ns
4-Piperidinecarboxamide	2-10days	834days	2.51952	0.0117514	0.0705082	ns
4-Piperidinecarboxamide	2-10days	872days	-1.64317	0.100348	0.501741	ns
4-Piperidinecarboxamide	219days	790days	-0.866025	0.386476	1	ns
4-Piperidinecarboxamide	219days	834days	-0.173205	0.86249	1	ns
4-Piperidinecarboxamide	219days	872days	-3.4641	0.000532006	0.00532006	**
4-Piperidinecarboxamide	790days	834days	0.69282	0.488422	1	ns
4-Piperidinecarboxamide	790days	872days	-2.59808	0.00937477	0.0656234	ns
4-Piperidinecarboxamide	834days	872days	-3.2909	0.000998686	0.00898818	**
5-Nitroindoline	2-10days	219days	1.88051	0.060038	0.30019	ns
5-Nitroindoline	2-10days	790days	-2.35521	0.0185124	0.148099	ns
5-Nitroindoline	2-10days	834days	-0.675524	0.499343	0.998685	ns
5-Nitroindoline	2-10days	872days	-2.20915	0.0271644	0.190151	ns
5-Nitroindoline	219days	790days	-3.34863	0.000812117	0.00812117	**
5-Nitroindoline	219days	834days	-2.02073	0.0433081	0.259849	ns
5-Nitroindoline	219days	872days	-3.23316	0.00122428	0.0110185	*
5-Nitroindoline	790days	834days	1.32791	0.184209	0.736837	ns
5-Nitroindoline	790days	872days	0.11547	0.908073	0.998685	ns
5-Nitroindoline	834days	872days	-1.21244	0.225346	0.736837	ns
8-iso-13,14-dihydro-15-keto Prostaglandin F2	2-10days	219days	-2.33695	0.0194418	0.155534	ns
8-iso-13,14-dihydro-15-keto Prostaglandin F2	2-10days	790days	-2.62907	0.00856192	0.0770573	ns
8-iso-13,14-dihydro-15-keto Prostaglandin F2	2-10days	834days	-3.35937	0.000781218	0.00781218	**
8-iso-13,14-dihydro-15-keto Prostaglandin F2	2-10days	872days	-0.730297	0.465209	1	ns
8-iso-13,14-dihydro-15-keto Prostaglandin F2	219days	790days	-0.23094	0.817361	1	ns
8-iso-13,14-dihydro-15-keto Prostaglandin F2	219days	834days	-0.80829	0.418923	1	ns
8-iso-13,14-dihydro-15-keto Prostaglandin F2	219days	872days	1.27017	0.204024	1	ns
8-iso-13,14-dihydro-15-keto Prostaglandin F2	790days	834days	-0.57735	0.563703	1	ns
8-iso-13,14-dihydro-15-keto Prostaglandin F2	790days	872days	1.50111	0.133327	0.799962	ns
8-iso-13,14-dihydro-15-keto Prostaglandin F2	834days	872days	2.07846	0.0376669	0.263668	ns
8(S)-Hydroxy-(5Z,9E,11Z,14Z)-eicosatetraenoic acid	2-10days	219days	-2.51952	0.0117514	0.094011	ns
8(S)-Hydroxy-(5Z,9E,11Z,14Z)-eicosatetraenoic acid	2-10days	790days	-2.08135	0.0374023	0.228644	ns
8(S)-Hydroxy-(5Z,9E,11Z,14Z)-eicosatetraenoic acid	2-10days	834days	-3.17679	0.00148914	0.0148914	*
8(S)-Hydroxy-(5Z,9E,11Z,14Z)-eicosatetraenoic acid	2-10days	872days	0.182574	0.855132	1	ns
8(S)-Hydroxy-(5Z,9E,11Z,14Z)-eicosatetraenoic acid	219days	790days	0.34641	0.729034	1	ns
8(S)-Hydroxy-(5Z,9E,11Z,14Z)-eicosatetraenoic acid	219days	834days	-0.519615	0.603332	1	ns
8(S)-Hydroxy-(5Z,9E,11Z,14Z)-eicosatetraenoic acid	219days	872days	2.1362	0.0326634	0.228644	ns
8(S)-Hydroxy-(5Z,9E,11Z,14Z)-eicosatetraenoic acid	790days	834days	-0.866025	0.386476	1	ns
8(S)-Hydroxy-(5Z,9E,11Z,14Z)-eicosatetraenoic acid	790days	872days	1.78979	0.0734883	0.367442	ns
8(S)-Hydroxy-(5Z,9E,11Z,14Z)-eicosatetraenoic acid	834days	872days	2.65581	0.00791179	0.0712061	ns
9-Oxo-ODE	2-10days	219days	0.273861	0.784191	1	ns
9-Oxo-ODE	2-10days	790days	-1.25976	0.207755	1	ns
9-Oxo-ODE	2-10days	834days	-0.164317	0.869482	1	ns
9-Oxo-ODE	2-10days	872days	2.46475	0.0137108	0.123397	ns
9-Oxo-ODE	219days	790days	-1.21244	0.225346	1	ns
9-Oxo-ODE	219days	834days	-0.34641	0.729034	1	ns
9-Oxo-ODE	219days	872days	1.73205	0.0832645	0.582852	ns
9-Oxo-ODE	790days	834days	0.866025	0.386476	1	ns
9-Oxo-ODE	790days	872days	2.94449	0.00323491	0.0323491	*
9-Oxo-ODE	834days	872days	2.07846	0.0376669	0.301335	ns
Acetyl-beta-methylcholine	2-10days	219days	3.32285	0.000891028	0.00891028	**
Acetyl-beta-methylcholine	2-10days	790days	2.30043	0.0214236	0.171389	ns
Acetyl-beta-methylcholine	2-10days	834days	2.30043	0.0214236	0.171389	ns
Acetyl-beta-methylcholine	2-10days	872days	0.255604	0.798257	1	ns
Acetyl-beta-methylcholine	219days	790days	-0.80829	0.418923	1	ns
Acetyl-beta-methylcholine	219days	834days	-0.80829	0.418923	1	ns
Acetyl-beta-methylcholine	219days	872days	-2.42487	0.0153138	0.137824	ns
Acetyl-beta-methylcholine	790days	834days	0	1	1	ns
Acetyl-beta-methylcholine	790days	872days	-1.61658	0.105969	0.635813	ns
Acetyl-beta-methylcholine	834days	872days	-1.61658	0.105969	0.635813	ns
Acetyl-L-carnitine	2-10days	219days	-0.255604	0.798257	1	ns
Acetyl-L-carnitine	2-10days	790days	1.64317	0.100348	0.940686	ns
Acetyl-L-carnitine	2-10days	834days	1.42408	0.154424	1	ns
Acetyl-L-carnitine	2-10days	872days	-0.474693	0.635006	1	ns
Acetyl-L-carnitine	219days	790days	1.50111	0.133327	1	ns
Acetyl-L-carnitine	219days	834days	1.32791	0.184209	1	ns
Acetyl-L-carnitine	219days	872days	-0.173205	0.86249	1	ns
Acetyl-L-carnitine	790days	834days	-0.173205	0.86249	1	ns
Acetyl-L-carnitine	790days	872days	-1.67432	0.0940686	0.940686	ns
Acetyl-L-carnitine	834days	872days	-1.50111	0.133327	1	ns
Acetylarginine	2-10days	219days	-0.292119	0.770196	1	ns
Acetylarginine	2-10days	790days	1.89877	0.0575945	0.287973	ns
Acetylarginine	2-10days	834days	2.48301	0.0130278	0.104222	ns
Acetylarginine	2-10days	872days	-2.04483	0.0408715	0.245229	ns
Acetylarginine	219days	790days	1.73205	0.0832645	0.333058	ns
Acetylarginine	219days	834days	2.19393	0.0282404	0.197683	ns
Acetylarginine	219days	872days	-1.38564	0.165857	0.49757	ns
Acetylarginine	790days	834days	0.46188	0.644167	1	ns
Acetylarginine	790days	872days	-3.11769	0.00182274	0.0164046	*
Acetylarginine	834days	872days	-3.57957	0.000344158	0.00344158	**
Acetylcholine	2-10days	219days	2.64733	0.00811312	0.0730181	ns
Acetylcholine	2-10days	790days	3.01247	0.00259128	0.0259128	*
Acetylcholine	2-10days	834days	0.602495	0.546845	1	ns
Acetylcholine	2-10days	872days	1.18673	0.235333	1	ns
Acetylcholine	219days	790days	0.288675	0.77283	1	ns
Acetylcholine	219days	834days	-1.61658	0.105969	0.741782	ns
Acetylcholine	219days	872days	-1.1547	0.248213	1	ns
Acetylcholine	790days	834days	-1.90526	0.0567468	0.453975	ns
Acetylcholine	790days	872days	-1.44338	0.148915	0.893488	ns
Acetylcholine	834days	872days	0.46188	0.644167	1	ns
Adenine	2-10days	219days	-0.0365148	0.970872	0.972546	ns
Adenine	2-10days	790days	-0.985901	0.324182	0.972546	ns
Adenine	2-10days	834days	1.78923	0.0735783	0.44147	ns
Adenine	2-10days	872days	-2.51952	0.0117514	0.105762	ns
Adenine	219days	790days	-0.750555	0.45292	0.972546	ns
Adenine	219days	834days	1.44338	0.148915	0.744573	ns
Adenine	219days	872days	-1.96299	0.0496472	0.347531	ns
Adenine	790days	834days	2.19393	0.0282404	0.225923	ns
Adenine	790days	872days	-1.21244	0.225346	0.901383	ns
Adenine	834days	872days	-3.40637	0.000658337	0.00658337	**
Adenosine	2-10days	219days	3.24982	0.00115478	0.0115478	*
Adenosine	2-10days	790days	2.15438	0.0312107	0.218475	ns
Adenosine	2-10days	834days	2.37346	0.0176221	0.140977	ns
Adenosine	2-10days	872days	-0.182574	0.855132	1	ns
Adenosine	219days	790days	-0.866025	0.386476	1	ns
Adenosine	219days	834days	-0.69282	0.488422	1	ns
Adenosine	219days	872days	-2.71355	0.00665673	0.0599105	ns
Adenosine	790days	834days	0.173205	0.86249	1	ns
Adenosine	790days	872days	-1.84752	0.0646717	0.323358	ns
Adenosine	834days	872days	-2.02073	0.0433081	0.259849	ns
Adrenic acid	2-10days	219days	-2.24566	0.0247256	0.173079	ns
Adrenic acid	2-10days	790days	-0.127802	0.898306	1	ns
Adrenic acid	2-10days	834days	-2.61081	0.00903278	0.0722623	ns
Adrenic acid	2-10days	872days	1.33279	0.1826	0.730401	ns
Adrenic acid	219days	790days	1.67432	0.0940686	0.470343	ns
Adrenic acid	219days	834days	-0.288675	0.77283	1	ns
Adrenic acid	219days	872days	2.82902	0.00466913	0.0420222	*
Adrenic acid	790days	834days	-1.96299	0.0496472	0.297883	ns
Adrenic acid	790days	872days	1.1547	0.248213	0.744639	ns
Adrenic acid	834days	872days	3.11769	0.00182274	0.0182274	*
Arachidonic acid	2-10days	219days	-2.66558	0.00768549	0.0537985	ns
Arachidonic acid	2-10days	790days	-1.78923	0.0735783	0.367891	ns
Arachidonic acid	2-10days	834days	-2.88467	0.00391821	0.0352639	*
Arachidonic acid	2-10days	872days	0.912871	0.36131	1	ns
Arachidonic acid	219days	790days	0.69282	0.488422	1	ns
Arachidonic acid	219days	834days	-0.173205	0.86249	1	ns
Arachidonic acid	219days	872days	2.82902	0.00466913	0.0373531	*
Arachidonic acid	790days	834days	-0.866025	0.386476	1	ns
Arachidonic acid	790days	872days	2.1362	0.0326634	0.195981	ns
Arachidonic acid	834days	872days	3.00222	0.00268017	0.0268017	*
Azelaic acid	2-10days	219days	-0.894614	0.370994	1	ns
Azelaic acid	2-10days	790days	-1.69794	0.0895191	0.805672	ns
Azelaic acid	2-10days	834days	-2.35521	0.0185124	0.185124	ns
Azelaic acid	2-10days	872days	-0.748554	0.454126	1	ns
Azelaic acid	219days	790days	-0.635085	0.525373	1	ns
Azelaic acid	219days	834days	-1.1547	0.248213	1	ns
Azelaic acid	219days	872days	0.11547	0.908073	1	ns
Azelaic acid	790days	834days	-0.519615	0.603332	1	ns
Azelaic acid	790days	872days	0.750555	0.45292	1	ns
Azelaic acid	834days	872days	1.27017	0.204024	1	ns
Caprolactam	2-10days	219days	2.26392	0.023579	0.212211	ns
Caprolactam	2-10days	790days	0.730297	0.465209	1	ns
Caprolactam	2-10days	834days	0.584237	0.559061	1	ns
Caprolactam	2-10days	872days	-2.11786	0.0341869	0.228644	ns
Caprolactam	219days	790days	-1.21244	0.225346	0.921046	ns
Caprolactam	219days	834days	-1.32791	0.184209	0.921046	ns
Caprolactam	219days	872days	-3.4641	0.000532006	0.00532006	**
Caprolactam	790days	834days	-0.11547	0.908073	1	ns
Caprolactam	790days	872days	-2.25167	0.0243434	0.212211	ns
Caprolactam	834days	872days	-2.1362	0.0326634	0.228644	ns
CAPSO	2-10days	219days	-2.04483	0.0408715	0.326972	ns
CAPSO	2-10days	790days	-2.84816	0.00439732	0.0395759	*
CAPSO	2-10days	834days	-1.75271	0.0796514	0.55756	ns
CAPSO	2-10days	872days	-3.57845	0.000345633	0.00345633	**
CAPSO	219days	790days	-0.635085	0.525373	1	ns
CAPSO	219days	834days	0.23094	0.817361	1	ns
CAPSO	219days	872days	-1.21244	0.225346	1	ns
CAPSO	790days	834days	0.866025	0.386476	1	ns
CAPSO	790days	872days	-0.57735	0.563703	1	ns
CAPSO	834days	872days	-1.44338	0.148915	0.893488	ns
Choline	2-10days	219days	-1.99006	0.0465845	0.41926	ns
Choline	2-10days	790days	-1.62491	0.104182	0.729272	ns
Choline	2-10days	834days	-1.1137	0.265407	1	ns
Choline	2-10days	872days	-3.30459	0.000951145	0.00951145	**
Choline	219days	790days	0.288675	0.77283	1	ns
Choline	219days	834days	0.69282	0.488422	1	ns
Choline	219days	872days	-1.03923	0.298698	1	ns
Choline	790days	834days	0.404145	0.686106	1	ns
Choline	790days	872days	-1.32791	0.184209	1	ns
Choline	834days	872days	-1.73205	0.0832645	0.666116	ns
Corchorifatty acid F	2-10days	219days	-2.00832	0.0446097	0.267658	ns
Corchorifatty acid F	2-10days	790days	-1.93529	0.0529552	0.267658	ns
Corchorifatty acid F	2-10days	834days	-2.9577	0.00309942	0.0278948	*
Corchorifatty acid F	2-10days	872days	1.64317	0.100348	0.401393	ns
Corchorifatty acid F	219days	790days	0.057735	0.95396	1	ns
Corchorifatty acid F	219days	834days	-0.750555	0.45292	1	ns
Corchorifatty acid F	219days	872days	2.88675	0.00389242	0.0311393	*
Corchorifatty acid F	790days	834days	-0.80829	0.418923	1	ns
Corchorifatty acid F	790days	872days	2.82902	0.00466913	0.0326839	*
Corchorifatty acid F	834days	872days	3.63731	0.000275504	0.00275504	**
Creatine	2-10days	219days	-2.81164	0.00492893	0.0443603	*
Creatine	2-10days	790days	-2.88467	0.00391821	0.0391821	*
Creatine	2-10days	834days	-2.81164	0.00492893	0.0443603	*
Creatine	2-10days	872days	-2.00832	0.0446097	0.312268	ns
Creatine	219days	790days	-0.057735	0.95396	1	ns
Creatine	219days	834days	0	1	1	ns
Creatine	219days	872days	0.635085	0.525373	1	ns
Creatine	790days	834days	0.057735	0.95396	1	ns
Creatine	790days	872days	0.69282	0.488422	1	ns
Creatine	834days	872days	0.635085	0.525373	1	ns
Creatinine	2-10days	219days	-2.59255	0.00952664	0.0762131	ns
Creatinine	2-10days	790days	-2.66558	0.00768549	0.0691694	ns
Creatinine	2-10days	834days	-1.64317	0.100348	0.702438	ns
Creatinine	2-10days	872days	-3.61497	0.000300384	0.00300384	**
Creatinine	219days	790days	-0.057735	0.95396	1	ns
Creatinine	219days	834days	0.750555	0.45292	1	ns
Creatinine	219days	872days	-0.80829	0.418923	1	ns
Creatinine	790days	834days	0.80829	0.418923	1	ns
Creatinine	790days	872days	-0.750555	0.45292	1	ns
Creatinine	834days	872days	-1.55885	0.119033	0.714197	ns
Dodecanoic acid	2-10days	219days	0.620752	0.534763	1	ns
Dodecanoic acid	2-10days	790days	-0.182574	0.855132	1	ns
Dodecanoic acid	2-10days	834days	-0.182574	0.855132	1	ns
Dodecanoic acid	2-10days	872days	2.66558	0.00768549	0.0768549	ns
Dodecanoic acid	219days	790days	-0.635085	0.525373	1	ns
Dodecanoic acid	219days	834days	-0.635085	0.525373	1	ns
Dodecanoic acid	219days	872days	1.61658	0.105969	0.741782	ns
Dodecanoic acid	790days	834days	0	1	1	ns
Dodecanoic acid	790days	872days	2.25167	0.0243434	0.21909	ns
Dodecanoic acid	834days	872days	2.25167	0.0243434	0.21909	ns
L,L-Cyclo(leucylprolyl)	2-10days	219days	3.34111	0.000834449	0.00834449	**
L,L-Cyclo(leucylprolyl)	2-10days	790days	0.931128	0.351787	1	ns
L,L-Cyclo(leucylprolyl)	2-10days	834days	1.36931	0.170904	0.99514	ns
L,L-Cyclo(leucylprolyl)	2-10days	872days	2.68384	0.00727818	0.0655036	ns
L,L-Cyclo(leucylprolyl)	219days	790days	-1.90526	0.0567468	0.453975	ns
L,L-Cyclo(leucylprolyl)	219days	834days	-1.55885	0.119033	0.83323	ns
L,L-Cyclo(leucylprolyl)	219days	872days	-0.519615	0.603332	1	ns
L,L-Cyclo(leucylprolyl)	790days	834days	0.34641	0.729034	1	ns
L,L-Cyclo(leucylprolyl)	790days	872days	1.38564	0.165857	0.99514	ns
L,L-Cyclo(leucylprolyl)	834days	872days	1.03923	0.298698	1	ns
Cytosine	2-10days	219days	-0.0547723	0.95632	1	ns
Cytosine	2-10days	790days	0.967643	0.333223	1	ns
Cytosine	2-10days	834days	2.42824	0.0151724	0.151724	ns
Cytosine	2-10days	872days	-0.56598	0.571407	1	ns
Cytosine	219days	790days	0.80829	0.418923	1	ns
Cytosine	219days	834days	1.96299	0.0496472	0.397178	ns
Cytosine	219days	872days	-0.404145	0.686106	1	ns
Cytosine	790days	834days	1.1547	0.248213	1	ns
Cytosine	790days	872days	-1.21244	0.225346	1	ns
Cytosine	834days	872days	-2.36714	0.0179263	0.161337	ns
D-(+)-Galactose	2-10days	219days	1.09545	0.273322	1	ns
D-(+)-Galactose	2-10days	790days	-1.75271	0.0796514	0.55756	ns
D-(+)-Galactose	2-10days	834days	-0.876356	0.380836	1	ns
D-(+)-Galactose	2-10days	872days	-2.84816	0.00439732	0.0395759	*
D-(+)-Galactose	219days	790days	-2.25167	0.0243434	0.194747	ns
D-(+)-Galactose	219days	834days	-1.55885	0.119033	0.714197	ns
D-(+)-Galactose	219days	872days	-3.11769	0.00182274	0.0182274	*
D-(+)-Galactose	790days	834days	0.69282	0.488422	1	ns
D-(+)-Galactose	790days	872days	-0.866025	0.386476	1	ns
D-(+)-Galactose	834days	872days	-1.55885	0.119033	0.714197	ns
D-(+)-Proline	2-10days	219days	0.365148	0.715001	1	ns
D-(+)-Proline	2-10days	790days	2.26392	0.023579	0.188632	ns
D-(+)-Proline	2-10days	834days	3.06725	0.00216041	0.0216041	*
D-(+)-Proline	2-10days	872days	2.77513	0.005518	0.049662	*
D-(+)-Proline	219days	790days	1.50111	0.133327	0.666635	ns
D-(+)-Proline	219days	834days	2.1362	0.0326634	0.228644	ns
D-(+)-Proline	219days	872days	1.90526	0.0567468	0.340481	ns
D-(+)-Proline	790days	834days	0.635085	0.525373	1	ns
D-(+)-Proline	790days	872days	0.404145	0.686106	1	ns
D-(+)-Proline	834days	872days	-0.23094	0.817361	1	ns
Desthiobiotin	2-10days	219days	-0.346891	0.728673	1	ns
Desthiobiotin	2-10days	790days	-1.44234	0.149208	1	ns
Desthiobiotin	2-10days	834days	0.383406	0.701419	1	ns
Desthiobiotin	2-10days	872days	-2.8299	0.00465626	0.0465626	*
Desthiobiotin	219days	790days	-0.866025	0.386476	1	ns
Desthiobiotin	219days	834days	0.57735	0.563703	1	ns
Desthiobiotin	219days	872days	-1.96299	0.0496472	0.397178	ns
Desthiobiotin	790days	834days	1.44338	0.148915	1	ns
Desthiobiotin	790days	872days	-1.09697	0.272656	1	ns
Desthiobiotin	834days	872days	-2.54034	0.0110744	0.0996699	ns
Didecyldimethylammonium	2-10days	219days	2.90293	0.0036969	0.0332721	*
Didecyldimethylammonium	2-10days	790days	1.44234	0.149208	0.746038	ns
Didecyldimethylammonium	2-10days	834days	1.66143	0.0966281	0.579769	ns
Didecyldimethylammonium	2-10days	872days	-1.18673	0.235333	0.941333	ns
Didecyldimethylammonium	219days	790days	-1.1547	0.248213	0.941333	ns
Didecyldimethylammonium	219days	834days	-0.981495	0.326348	0.941333	ns
Didecyldimethylammonium	219days	872days	-3.23316	0.00122428	0.0122428	*
Didecyldimethylammonium	790days	834days	0.173205	0.86249	0.941333	ns
Didecyldimethylammonium	790days	872days	-2.07846	0.0376669	0.263668	ns
Didecyldimethylammonium	834days	872days	-2.25167	0.0243434	0.194747	ns
DL-Î±-Leucine	2-10days	219days	-3.39588	0.000684084	0.00684084	**
DL-Î±-Leucine	2-10days	790days	-0.547723	0.583882	1	ns
DL-Î±-Leucine	2-10days	834days	-2.51952	0.0117514	0.105762	ns
DL-Î±-Leucine	2-10days	872days	-2.30043	0.0214236	0.171389	ns
DL-Î±-Leucine	219days	790days	2.25167	0.0243434	0.171389	ns
DL-Î±-Leucine	219days	834days	0.69282	0.488422	1	ns
DL-Î±-Leucine	219days	872days	0.866025	0.386476	1	ns
DL-Î±-Leucine	790days	834days	-1.55885	0.119033	0.714197	ns
DL-Î±-Leucine	790days	872days	-1.38564	0.165857	0.829283	ns
DL-Î±-Leucine	834days	872days	0.173205	0.86249	1	ns
DL-Mandelic acid	2-10days	219days	2.62907	0.00856192	0.0856192	ns
DL-Mandelic acid	2-10days	790days	0.584237	0.559061	1	ns
DL-Mandelic acid	2-10days	834days	-0.657267	0.511009	1	ns
DL-Mandelic acid	2-10days	872days	0.0730297	0.941783	1	ns
DL-Mandelic acid	219days	790days	-1.61658	0.105969	0.741782	ns
DL-Mandelic acid	219days	834days	-2.59808	0.00937477	0.0856192	ns
DL-Mandelic acid	219days	872days	-2.02073	0.0433081	0.346465	ns
DL-Mandelic acid	790days	834days	-0.981495	0.326348	1	ns
DL-Mandelic acid	790days	872days	-0.404145	0.686106	1	ns
DL-Mandelic acid	834days	872days	0.57735	0.563703	1	ns
DL-Metanephrine	2-10days	219days	2.15438	0.0312107	0.249686	ns
DL-Metanephrine	2-10days	790days	2.59255	0.00952664	0.0857397	ns
DL-Metanephrine	2-10days	834days	2.66558	0.00768549	0.0768549	ns
DL-Metanephrine	2-10days	872days	1.93529	0.0529552	0.370686	ns
DL-Metanephrine	219days	790days	0.34641	0.729034	1	ns
DL-Metanephrine	219days	834days	0.404145	0.686106	1	ns
DL-Metanephrine	219days	872days	-0.173205	0.86249	1	ns
DL-Metanephrine	790days	834days	0.057735	0.95396	1	ns
DL-Metanephrine	790days	872days	-0.519615	0.603332	1	ns
DL-Metanephrine	834days	872days	-0.57735	0.563703	1	ns
Docosahexaenoic acid	2-10days	219days	-1.7162	0.0861259	0.43063	ns
Docosahexaenoic acid	2-10days	790days	-2.88467	0.00391821	0.0313457	*
Docosahexaenoic acid	2-10days	834days	-2.51952	0.0117514	0.0822596	ns
Docosahexaenoic acid	2-10days	872days	1.27802	0.201243	0.80497	ns
Docosahexaenoic acid	219days	790days	-0.92376	0.355611	1	ns
Docosahexaenoic acid	219days	834days	-0.635085	0.525373	1	ns
Docosahexaenoic acid	219days	872days	2.36714	0.0179263	0.107558	ns
Docosahexaenoic acid	790days	834days	0.288675	0.77283	1	ns
Docosahexaenoic acid	790days	872days	3.2909	0.000998686	0.00998686	**
Docosahexaenoic acid	834days	872days	3.00222	0.00268017	0.0241215	*
Dodecyl sulfate	2-10days	219days	-1.89877	0.0575945	0.345567	ns
Dodecyl sulfate	2-10days	790days	-2.62907	0.00856192	0.0712061	ns
Dodecyl sulfate	2-10days	834days	0.292119	0.770196	1	ns
Dodecyl sulfate	2-10days	872days	-3.06725	0.00216041	0.0216041	*
Dodecyl sulfate	219days	790days	-0.57735	0.563703	1	ns
Dodecyl sulfate	219days	834days	1.73205	0.0832645	0.416323	ns
Dodecyl sulfate	219days	872days	-0.92376	0.355611	1	ns
Dodecyl sulfate	790days	834days	2.3094	0.0209213	0.146449	ns
Dodecyl sulfate	790days	872days	-0.34641	0.729034	1	ns
Dodecyl sulfate	834days	872days	-2.65581	0.00791179	0.0712061	ns
Ethyl palmitoleate	2-10days	219days	1.1137	0.265407	1	ns
Ethyl palmitoleate	2-10days	790days	2.5743	0.0100444	0.0903999	ns
Ethyl palmitoleate	2-10days	834days	1.55188	0.120691	0.844836	ns
Ethyl palmitoleate	2-10days	872days	3.37762	0.000731154	0.00731154	**
Ethyl palmitoleate	219days	790days	1.1547	0.248213	1	ns
Ethyl palmitoleate	219days	834days	0.34641	0.729034	1	ns
Ethyl palmitoleate	219days	872days	1.78979	0.0734883	0.587907	ns
Ethyl palmitoleate	790days	834days	-0.80829	0.418923	1	ns
Ethyl palmitoleate	790days	872days	0.635085	0.525373	1	ns
Ethyl palmitoleate	834days	872days	1.44338	0.148915	0.893488	ns
Glycylproline	2-10days	219days	-0.931128	0.351787	1	ns
Glycylproline	2-10days	790days	2.5743	0.0100444	0.0903999	ns
Glycylproline	2-10days	834days	2.20915	0.0271644	0.162986	ns
Glycylproline	2-10days	872days	-0.49295	0.622048	1	ns
Glycylproline	219days	790days	2.77128	0.00558362	0.0558362	ns
Glycylproline	219days	834days	2.48261	0.0130425	0.10434	ns
Glycylproline	219days	872days	0.34641	0.729034	1	ns
Glycylproline	790days	834days	-0.288675	0.77283	1	ns
Glycylproline	790days	872days	-2.42487	0.0153138	0.107197	ns
Glycylproline	834days	872days	-2.1362	0.0326634	0.163317	ns
Guanine	2-10days	219days	2.19089	0.0284597	0.227678	ns
Guanine	2-10days	790days	0.219089	0.826581	1	ns
Guanine	2-10days	834days	1.67968	0.0930191	0.465096	ns
Guanine	2-10days	872days	-2.04483	0.0408715	0.286101	ns
Guanine	219days	790days	-1.55885	0.119033	0.476132	ns
Guanine	219days	834days	-0.404145	0.686106	1	ns
Guanine	219days	872days	-3.34863	0.000812117	0.00812117	**
Guanine	790days	834days	1.1547	0.248213	0.744639	ns
Guanine	790days	872days	-1.78979	0.0734883	0.44093	ns
Guanine	834days	872days	-2.94449	0.00323491	0.0291142	*
Hexadecanedioic acid	2-10days	219days	-2.48301	0.0130278	0.104222	ns
Hexadecanedioic acid	2-10days	790days	0	1	1	ns
Hexadecanedioic acid	2-10days	834days	-2.11786	0.0341869	0.239308	ns
Hexadecanedioic acid	2-10days	872days	1.9718	0.0486323	0.291794	ns
Hexadecanedioic acid	219days	790days	1.96299	0.0496472	0.291794	ns
Hexadecanedioic acid	219days	834days	0.288675	0.77283	1	ns
Hexadecanedioic acid	219days	872days	3.52184	0.000428568	0.00428568	**
Hexadecanedioic acid	790days	834days	-1.67432	0.0940686	0.376274	ns
Hexadecanedioic acid	790days	872days	1.55885	0.119033	0.376274	ns
Hexadecanedioic acid	834days	872days	3.23316	0.00122428	0.0110185	*
Hypoxanthine	2-10days	219days	-2.81164	0.00492893	0.0443603	*
Hypoxanthine	2-10days	790days	-1.93529	0.0529552	0.370686	ns
Hypoxanthine	2-10days	834days	-2.15438	0.0312107	0.249686	ns
Hypoxanthine	2-10days	872days	-3.61497	0.000300384	0.00300384	**
Hypoxanthine	219days	790days	0.69282	0.488422	1	ns
Hypoxanthine	219days	834days	0.519615	0.603332	1	ns
Hypoxanthine	219days	872days	-0.635085	0.525373	1	ns
Hypoxanthine	790days	834days	-0.173205	0.86249	1	ns
Hypoxanthine	790days	872days	-1.32791	0.184209	1	ns
Hypoxanthine	834days	872days	-1.1547	0.248213	1	ns
Kynurenic acid	2-10days	219days	2.50127	0.012375	0.111375	ns
Kynurenic acid	2-10days	790days	0.894614	0.370994	1	ns
Kynurenic acid	2-10days	834days	-0.127802	0.898306	1	ns
Kynurenic acid	2-10days	872days	3.01247	0.00259128	0.0259128	*
Kynurenic acid	219days	790days	-1.27017	0.204024	1	ns
Kynurenic acid	219days	834days	-2.07846	0.0376669	0.263668	ns
Kynurenic acid	219days	872days	0.404145	0.686106	1	ns
Kynurenic acid	790days	834days	-0.80829	0.418923	1	ns
Kynurenic acid	790days	872days	1.67432	0.0940686	0.564411	ns
Kynurenic acid	834days	872days	2.48261	0.0130425	0.111375	ns
L-Norleucine	2-10days	219days	-1.88051	0.060038	0.480304	ns
L-Norleucine	2-10days	790days	-1.5884	0.112197	0.635813	ns
L-Norleucine	2-10days	834days	0.456435	0.648077	1	ns
L-Norleucine	2-10days	872days	-2.97596	0.00292074	0.0292074	*
L-Norleucine	219days	790days	0.23094	0.817361	1	ns
L-Norleucine	219days	834days	1.84752	0.0646717	0.480304	ns
L-Norleucine	219days	872days	-0.866025	0.386476	1	ns
L-Norleucine	790days	834days	1.61658	0.105969	0.635813	ns
L-Norleucine	790days	872days	-1.09697	0.272656	1	ns
L-Norleucine	834days	872days	-2.71355	0.00665673	0.0599105	ns
L-Phenylalanine	2-10days	219days	-3.10376	0.00191078	0.0191078	*
L-Phenylalanine	2-10days	790days	-2.37346	0.0176221	0.158599	ns
L-Phenylalanine	2-10days	834days	-1.7162	0.0861259	0.602882	ns
L-Phenylalanine	2-10days	872days	-2.15438	0.0312107	0.249686	ns
L-Phenylalanine	219days	790days	0.57735	0.563703	1	ns
L-Phenylalanine	219days	834days	1.09697	0.272656	1	ns
L-Phenylalanine	219days	872days	0.750555	0.45292	1	ns
L-Phenylalanine	790days	834days	0.519615	0.603332	1	ns
L-Phenylalanine	790days	872days	0.173205	0.86249	1	ns
L-Phenylalanine	834days	872days	-0.34641	0.729034	1	ns
Linoleic acid	2-10days	219days	-2.72036	0.00652118	0.0521694	ns
Linoleic acid	2-10days	790days	-1.55188	0.120691	0.483141	ns
Linoleic acid	2-10days	834days	-2.50127	0.012375	0.0775211	ns
Linoleic acid	2-10days	872days	1.66143	0.0966281	0.483141	ns
Linoleic acid	219days	790days	0.92376	0.355611	1	ns
Linoleic acid	219days	834days	0.173205	0.86249	1	ns
Linoleic acid	219days	872days	3.4641	0.000532006	0.00532006	**
Linoleic acid	790days	834days	-0.750555	0.45292	1	ns
Linoleic acid	790days	872days	2.54034	0.0110744	0.0775211	ns
Linoleic acid	834days	872days	3.2909	0.000998686	0.00898818	**
Methylimidazoleacetic acid	2-10days	219days	1.89877	0.0575945	0.287973	ns
Methylimidazoleacetic acid	2-10days	790days	2.40998	0.0159534	0.111674	ns
Methylimidazoleacetic acid	2-10days	834days	3.14028	0.00168789	0.0168789	*
Methylimidazoleacetic acid	2-10days	872days	-0.730297	0.465209	1	ns
Methylimidazoleacetic acid	219days	790days	0.404145	0.686106	1	ns
Methylimidazoleacetic acid	219days	834days	0.981495	0.326348	1	ns
Methylimidazoleacetic acid	219days	872days	-2.07846	0.0376669	0.226002	ns
Methylimidazoleacetic acid	790days	834days	0.57735	0.563703	1	ns
Methylimidazoleacetic acid	790days	872days	-2.48261	0.0130425	0.10434	ns
Methylimidazoleacetic acid	834days	872days	-3.05996	0.00221369	0.0199232	*
Methylmalonic acid	2-10days	219days	3.41414	0.000639843	0.00639843	**
Methylmalonic acid	2-10days	790days	1.95354	0.0507552	0.406042	ns
Methylmalonic acid	2-10days	834days	2.61081	0.00903278	0.0812951	ns
Methylmalonic acid	2-10days	872days	1.51537	0.12968	0.907759	ns
Methylmalonic acid	219days	790days	-1.1547	0.248213	1	ns
Methylmalonic acid	219days	834days	-0.635085	0.525373	1	ns
Methylmalonic acid	219days	872days	-1.50111	0.133327	0.907759	ns
Methylmalonic acid	790days	834days	0.519615	0.603332	1	ns
Methylmalonic acid	790days	872days	-0.34641	0.729034	1	ns
Methylmalonic acid	834days	872days	-0.866025	0.386476	1	ns
Mono(2-ethylhexyl) phthalate	2-10days	219days	-1.57014	0.116383	0.814681	ns
Mono(2-ethylhexyl) phthalate	2-10days	790days	-2.44649	0.0144253	0.129828	ns
Mono(2-ethylhexyl) phthalate	2-10days	834days	-1.86226	0.0625669	0.500535	ns
Mono(2-ethylhexyl) phthalate	2-10days	872days	-3.46891	0.000522575	0.00522575	**
Mono(2-ethylhexyl) phthalate	219days	790days	-0.69282	0.488422	1	ns
Mono(2-ethylhexyl) phthalate	219days	834days	-0.23094	0.817361	1	ns
Mono(2-ethylhexyl) phthalate	219days	872days	-1.50111	0.133327	0.814681	ns
Mono(2-ethylhexyl) phthalate	790days	834days	0.46188	0.644167	1	ns
Mono(2-ethylhexyl) phthalate	790days	872days	-0.80829	0.418923	1	ns
Mono(2-ethylhexyl) phthalate	834days	872days	-1.27017	0.204024	1	ns
Monobutyl phthalate	2-10days	219days	2.20915	0.0271644	0.162986	ns
Monobutyl phthalate	2-10days	790days	2.86641	0.0041515	0.033212	*
Monobutyl phthalate	2-10days	834days	1.18673	0.235333	0.736837	ns
Monobutyl phthalate	2-10days	872days	-1.73445	0.0828374	0.414187	ns
Monobutyl phthalate	219days	790days	0.519615	0.603332	0.837847	ns
Monobutyl phthalate	219days	834days	-0.80829	0.418923	0.837847	ns
Monobutyl phthalate	219days	872days	-3.11769	0.00182274	0.0164046	*
Monobutyl phthalate	790days	834days	-1.32791	0.184209	0.736837	ns
Monobutyl phthalate	790days	872days	-3.63731	0.000275504	0.00275504	**
Monobutyl phthalate	834days	872days	-2.3094	0.0209213	0.146449	ns
N-Acetylhistamine	2-10days	219days	0.602495	0.546845	1	ns
N-Acetylhistamine	2-10days	790days	0.237346	0.812388	1	ns
N-Acetylhistamine	2-10days	834days	2.20915	0.0271644	0.244479	ns
N-Acetylhistamine	2-10days	872days	-1.44234	0.149208	0.895246	ns
N-Acetylhistamine	219days	790days	-0.288675	0.77283	1	ns
N-Acetylhistamine	219days	834days	1.27017	0.204024	0.921046	ns
N-Acetylhistamine	219days	872days	-1.61658	0.105969	0.84775	ns
N-Acetylhistamine	790days	834days	1.55885	0.119033	0.84775	ns
N-Acetylhistamine	790days	872days	-1.32791	0.184209	0.921046	ns
N-Acetylhistamine	834days	872days	-2.88675	0.00389242	0.0389242	*
N-Isovalerylglycine	2-10days	219days	-0.438178	0.661257	1	ns
N-Isovalerylglycine	2-10days	790days	1.09545	0.273322	1	ns
N-Isovalerylglycine	2-10days	834days	1.38756	0.16527	1	ns
N-Isovalerylglycine	2-10days	872days	2.92119	0.003487	0.03487	*
N-Isovalerylglycine	219days	790days	1.21244	0.225346	1	ns
N-Isovalerylglycine	219days	834days	1.44338	0.148915	1	ns
N-Isovalerylglycine	219days	872days	2.65581	0.00791179	0.0712061	ns
N-Isovalerylglycine	790days	834days	0.23094	0.817361	1	ns
N-Isovalerylglycine	790days	872days	1.44338	0.148915	1	ns
N-Isovalerylglycine	834days	872days	1.21244	0.225346	1	ns
N-Methylnicotinamide	2-10days	219days	0.328634	0.742433	1	ns
N-Methylnicotinamide	2-10days	790days	1.86226	0.0625669	0.375401	ns
N-Methylnicotinamide	2-10days	834days	2.66558	0.00768549	0.0614839	ns
N-Methylnicotinamide	2-10days	872days	-1.93529	0.0529552	0.370686	ns
N-Methylnicotinamide	219days	790days	1.21244	0.225346	0.676037	ns
N-Methylnicotinamide	219days	834days	1.84752	0.0646717	0.375401	ns
N-Methylnicotinamide	219days	872days	-1.78979	0.0734883	0.375401	ns
N-Methylnicotinamide	790days	834days	0.635085	0.525373	1	ns
N-Methylnicotinamide	790days	872days	-3.00222	0.00268017	0.0241215	*
N-Methylnicotinamide	834days	872days	-3.63731	0.000275504	0.00275504	**
N-Phenylacetylglutamine	2-10days	219days	-1.5884	0.112197	0.785379	ns
N-Phenylacetylglutamine	2-10days	790days	-0.712039	0.47644	1	ns
N-Phenylacetylglutamine	2-10days	834days	-2.68384	0.00727818	0.0655036	ns
N-Phenylacetylglutamine	2-10days	872days	-3.34111	0.000834449	0.00834449	**
N-Phenylacetylglutamine	219days	790days	0.69282	0.488422	1	ns
N-Phenylacetylglutamine	219days	834days	-0.866025	0.386476	1	ns
N-Phenylacetylglutamine	219days	872days	-1.38564	0.165857	0.829283	ns
N-Phenylacetylglutamine	790days	834days	-1.55885	0.119033	0.785379	ns
N-Phenylacetylglutamine	790days	872days	-2.07846	0.0376669	0.301335	ns
N-Phenylacetylglutamine	834days	872days	-0.519615	0.603332	1	ns
N,N-Diethylethanolamine	2-10days	219days	2.88467	0.00391821	0.0352639	*
N,N-Diethylethanolamine	2-10days	790days	1.93529	0.0529552	0.370686	ns
N,N-Diethylethanolamine	2-10days	834days	3.61497	0.000300384	0.00300384	**
N,N-Diethylethanolamine	2-10days	872days	2.08135	0.0374023	0.299218	ns
N,N-Diethylethanolamine	219days	790days	-0.750555	0.45292	1	ns
N,N-Diethylethanolamine	219days	834days	0.57735	0.563703	1	ns
N,N-Diethylethanolamine	219days	872days	-0.635085	0.525373	1	ns
N,N-Diethylethanolamine	790days	834days	1.32791	0.184209	1	ns
N,N-Diethylethanolamine	790days	872days	0.11547	0.908073	1	ns
N,N-Diethylethanolamine	834days	872days	-1.21244	0.225346	1	ns
N,N'-Diphenylguanidine	2-10days	219days	0.0547723	0.95632	1	ns
N,N'-Diphenylguanidine	2-10days	790days	-1.62491	0.104182	0.62509	ns
N,N'-Diphenylguanidine	2-10days	834days	0.858099	0.390838	1	ns
N,N'-Diphenylguanidine	2-10days	872days	-2.64733	0.00811312	0.0730181	ns
N,N'-Diphenylguanidine	219days	790days	-1.32791	0.184209	0.921046	ns
N,N'-Diphenylguanidine	219days	834days	0.635085	0.525373	1	ns
N,N'-Diphenylguanidine	219days	872days	-2.1362	0.0326634	0.261308	ns
N,N'-Diphenylguanidine	790days	834days	1.96299	0.0496472	0.347531	ns
N,N'-Diphenylguanidine	790days	872days	-0.80829	0.418923	1	ns
N,N'-Diphenylguanidine	834days	872days	-2.77128	0.00558362	0.0558362	ns
D-Neopterin	2-10days	219days	-2.30043	0.0214236	0.171389	ns
D-Neopterin	2-10days	790days	-2.88467	0.00391821	0.0352639	*
D-Neopterin	2-10days	834days	-1.7162	0.0861259	0.602882	ns
D-Neopterin	2-10days	872days	-3.61497	0.000300384	0.00300384	**
D-Neopterin	219days	790days	-0.46188	0.644167	1	ns
D-Neopterin	219days	834days	0.46188	0.644167	1	ns
D-Neopterin	219days	872days	-1.03923	0.298698	1	ns
D-Neopterin	790days	834days	0.92376	0.355611	1	ns
D-Neopterin	790days	872days	-0.57735	0.563703	1	ns
D-Neopterin	834days	872days	-1.50111	0.133327	0.799962	ns
Nicotinamide	2-10days	219days	0.56598	0.571407	1	ns
Nicotinamide	2-10days	790days	-0.821584	0.411314	1	ns
Nicotinamide	2-10days	834days	-0.0182574	0.985433	1	ns
Nicotinamide	2-10days	872days	-2.50127	0.012375	0.12375	ns
Nicotinamide	219days	790days	-1.09697	0.272656	1	ns
Nicotinamide	219days	834days	-0.46188	0.644167	1	ns
Nicotinamide	219days	872days	-2.42487	0.0153138	0.137824	ns
Nicotinamide	790days	834days	0.635085	0.525373	1	ns
Nicotinamide	790days	872days	-1.32791	0.184209	1	ns
Nicotinamide	834days	872days	-1.96299	0.0496472	0.397178	ns
Nootkatone	2-10days	219days	-0.584237	0.559061	1	ns
Nootkatone	2-10days	790days	-1.89877	0.0575945	0.460756	ns
Nootkatone	2-10days	834days	-2.04483	0.0408715	0.367844	ns
Nootkatone	2-10days	872days	-2.77513	0.005518	0.05518	ns
Nootkatone	219days	790days	-1.03923	0.298698	1	ns
Nootkatone	219days	834days	-1.1547	0.248213	1	ns
Nootkatone	219days	872days	-1.73205	0.0832645	0.582852	ns
Nootkatone	790days	834days	-0.11547	0.908073	1	ns
Nootkatone	790days	872days	-0.69282	0.488422	1	ns
Nootkatone	834days	872days	-0.57735	0.563703	1	ns
Norbutorphanol	2-10days	219days	2.77513	0.005518	0.049662	*
Norbutorphanol	2-10days	790days	0.949386	0.342424	1	ns
Norbutorphanol	2-10days	834days	2.26392	0.023579	0.165053	ns
Norbutorphanol	2-10days	872days	-1.02242	0.306584	1	ns
Norbutorphanol	219days	790days	-1.44338	0.148915	0.744573	ns
Norbutorphanol	219days	834days	-0.404145	0.686106	1	ns
Norbutorphanol	219days	872days	-3.00222	0.00268017	0.0268017	*
Norbutorphanol	790days	834days	1.03923	0.298698	1	ns
Norbutorphanol	790days	872days	-1.55885	0.119033	0.714197	ns
Norbutorphanol	834days	872days	-2.59808	0.00937477	0.0749981	ns
Oleic acid	2-10days	219days	-2.81164	0.00492893	0.0394314	*
Oleic acid	2-10days	790days	-0.839841	0.400997	0.896093	ns
Oleic acid	2-10days	834days	-2.15438	0.0312107	0.218475	ns
Oleic acid	2-10days	872days	1.7162	0.0861259	0.43063	ns
Oleic acid	219days	790days	1.55885	0.119033	0.476132	ns
Oleic acid	219days	834days	0.519615	0.603332	0.896093	ns
Oleic acid	219days	872days	3.57957	0.000344158	0.00344158	**
Oleic acid	790days	834days	-1.03923	0.298698	0.896093	ns
Oleic acid	790days	872days	2.02073	0.0433081	0.259849	ns
Oleic acid	834days	872days	3.05996	0.00221369	0.0199232	*
Ostruthin	2-10days	219days	1.40582	0.159777	0.744573	ns
Ostruthin	2-10days	790days	-0.419921	0.674543	1	ns
Ostruthin	2-10days	834days	2.20915	0.0271644	0.217315	ns
Ostruthin	2-10days	872days	-2.17263	0.029808	0.217315	ns
Ostruthin	219days	790days	-1.44338	0.148915	0.744573	ns
Ostruthin	219days	834days	0.635085	0.525373	1	ns
Ostruthin	219days	872days	-2.82902	0.00466913	0.0420222	*
Ostruthin	790days	834days	2.07846	0.0376669	0.226002	ns
Ostruthin	790days	872days	-1.38564	0.165857	0.744573	ns
Ostruthin	834days	872days	-3.4641	0.000532006	0.00532006	**
Palmitic acid	2-10days	219days	-0.785069	0.432413	1	ns
Palmitic acid	2-10days	790days	0.383406	0.701419	1	ns
Palmitic acid	2-10days	834days	1.844	0.0651832	0.456283	ns
Palmitic acid	2-10days	872days	2.50127	0.012375	0.111375	ns
Palmitic acid	219days	790days	0.92376	0.355611	1	ns
Palmitic acid	219days	834days	2.07846	0.0376669	0.301335	ns
Palmitic acid	219days	872days	2.59808	0.00937477	0.0937477	ns
Palmitic acid	790days	834days	1.1547	0.248213	1	ns
Palmitic acid	790days	872days	1.67432	0.0940686	0.564411	ns
Palmitic acid	834days	872days	0.519615	0.603332	1	ns
Palmitoleic acid	2-10days	219days	-2.50127	0.012375	0.0990001	ns
Palmitoleic acid	2-10days	790days	-1.91703	0.0552343	0.331406	ns
Palmitoleic acid	2-10days	834days	-1.04067	0.298027	0.992852	ns
Palmitoleic acid	2-10days	872days	1.51537	0.12968	0.648399	ns
Palmitoleic acid	219days	790days	0.46188	0.644167	0.992852	ns
Palmitoleic acid	219days	834days	1.1547	0.248213	0.992852	ns
Palmitoleic acid	219days	872days	3.17543	0.00149616	0.0149616	*
Palmitoleic acid	790days	834days	0.69282	0.488422	0.992852	ns
Palmitoleic acid	790days	872days	2.71355	0.00665673	0.0599105	ns
Palmitoleic acid	834days	872days	2.02073	0.0433081	0.303157	ns
Palmitoyl ethanolamide	2-10days	219days	2.30043	0.0214236	0.171389	ns
Palmitoyl ethanolamide	2-10days	790days	2.9577	0.00309942	0.0278948	*
Palmitoyl ethanolamide	2-10days	834days	1.64317	0.100348	0.702438	ns
Palmitoyl ethanolamide	2-10days	872days	3.61497	0.000300384	0.00300384	**
Palmitoyl ethanolamide	219days	790days	0.519615	0.603332	1	ns
Palmitoyl ethanolamide	219days	834days	-0.519615	0.603332	1	ns
Palmitoyl ethanolamide	219days	872days	1.03923	0.298698	1	ns
Palmitoyl ethanolamide	790days	834days	-1.03923	0.298698	1	ns
Palmitoyl ethanolamide	790days	872days	0.519615	0.603332	1	ns
Palmitoyl ethanolamide	834days	872days	1.55885	0.119033	0.714197	ns
Palmitoyl sphingomyelin	2-10days	219days	-2.44649	0.0144253	0.144253	ns
Palmitoyl sphingomyelin	2-10days	790days	0.547723	0.583882	1	ns
Palmitoyl sphingomyelin	2-10days	834days	0.109545	0.912771	1	ns
Palmitoyl sphingomyelin	2-10days	872days	-1.13196	0.257651	1	ns
Palmitoyl sphingomyelin	219days	790days	2.36714	0.0179263	0.161337	ns
Palmitoyl sphingomyelin	219days	834days	2.02073	0.0433081	0.346465	ns
Palmitoyl sphingomyelin	219days	872days	1.03923	0.298698	1	ns
Palmitoyl sphingomyelin	790days	834days	-0.34641	0.729034	1	ns
Palmitoyl sphingomyelin	790days	872days	-1.32791	0.184209	1	ns
Palmitoyl sphingomyelin	834days	872days	-0.981495	0.326348	1	ns
Prolinamide	2-10days	219days	0.182574	0.855132	1	ns
Prolinamide	2-10days	790days	2.00832	0.0446097	0.312268	ns
Prolinamide	2-10days	834days	2.66558	0.00768549	0.0614839	ns
Prolinamide	2-10days	872days	-1.93529	0.0529552	0.312268	ns
Prolinamide	219days	790days	1.44338	0.148915	0.446744	ns
Prolinamide	219days	834days	1.96299	0.0496472	0.312268	ns
Prolinamide	219days	872days	-1.67432	0.0940686	0.376274	ns
Prolinamide	790days	834days	0.519615	0.603332	1	ns
Prolinamide	790days	872days	-3.11769	0.00182274	0.0164046	*
Prolinamide	834days	872days	-3.63731	0.000275504	0.00275504	**
Prolylglycine	2-10days	219days	2.00832	0.0446097	0.224414	ns
Prolylglycine	2-10days	790days	3.03073	0.00243962	0.0219566	*
Prolylglycine	2-10days	834days	2.08135	0.0374023	0.224414	ns
Prolylglycine	2-10days	872days	-1.27802	0.201243	0.80497	ns
Prolylglycine	219days	790days	0.80829	0.418923	1	ns
Prolylglycine	219days	834days	0.057735	0.95396	1	ns
Prolylglycine	219days	872days	-2.59808	0.00937477	0.0656234	ns
Prolylglycine	790days	834days	-0.750555	0.45292	1	ns
Prolylglycine	790days	872days	-3.40637	0.000658337	0.00658337	**
Prolylglycine	834days	872days	-2.65581	0.00791179	0.0632943	ns
Prolylleucine	2-10days	219days	0.127802	0.898306	1	ns
Prolylleucine	2-10days	790days	2.24566	0.0247256	0.173079	ns
Prolylleucine	2-10days	834days	2.46475	0.0137108	0.109687	ns
Prolylleucine	2-10days	872days	-1.77097	0.0765658	0.38803	ns
Prolylleucine	219days	790days	1.67432	0.0940686	0.38803	ns
Prolylleucine	219days	834days	1.84752	0.0646717	0.38803	ns
Prolylleucine	219days	872days	-1.50111	0.133327	0.399981	ns
Prolylleucine	790days	834days	0.173205	0.86249	1	ns
Prolylleucine	790days	872days	-3.17543	0.00149616	0.0134655	*
Prolylleucine	834days	872days	-3.34863	0.000812117	0.00812117	**
Sedanolide	2-10days	219days	3.06725	0.00216041	0.0194437	*
Sedanolide	2-10days	790days	1.53362	0.125122	0.875857	ns
Sedanolide	2-10days	834days	2.48301	0.0130278	0.104222	ns
Sedanolide	2-10days	872days	3.14028	0.00168789	0.0168789	*
Sedanolide	219days	790days	-1.21244	0.225346	1	ns
Sedanolide	219days	834days	-0.46188	0.644167	1	ns
Sedanolide	219days	872days	0.057735	0.95396	1	ns
Sedanolide	790days	834days	0.750555	0.45292	1	ns
Sedanolide	790days	872days	1.27017	0.204024	1	ns
Sedanolide	834days	872days	0.519615	0.603332	1	ns
Stearic acid	2-10days	219days	-0.785069	0.432413	1	ns
Stearic acid	2-10days	790days	0.383406	0.701419	1	ns
Stearic acid	2-10days	834days	-1.00416	0.315302	1	ns
Stearic acid	2-10days	872days	0.0912871	0.927264	1	ns
Stearic acid	219days	790days	0.92376	0.355611	1	ns
Stearic acid	219days	834days	-0.173205	0.86249	1	ns
Stearic acid	219days	872days	0.69282	0.488422	1	ns
Stearic acid	790days	834days	-1.09697	0.272656	1	ns
Stearic acid	790days	872days	-0.23094	0.817361	1	ns
Stearic acid	834days	872days	0.866025	0.386476	1	ns
Taurine	2-10days	219days	-2.40998	0.0159534	0.127627	ns
Taurine	2-10days	790days	-3.57845	0.000345633	0.00345633	**
Taurine	2-10days	834days	-2.77513	0.005518	0.049662	*
Taurine	2-10days	872days	-1.46059	0.144127	0.864762	ns
Taurine	219days	790days	-0.92376	0.355611	1	ns
Taurine	219days	834days	-0.288675	0.77283	1	ns
Taurine	219days	872days	0.750555	0.45292	1	ns
Taurine	790days	834days	0.635085	0.525373	1	ns
Taurine	790days	872days	1.67432	0.0940686	0.65848	ns
Taurine	834days	872days	1.03923	0.298698	1	ns
Tetranor-12R-HETE	2-10days	219days	-1.62491	0.104182	0.483141	ns
Tetranor-12R-HETE	2-10days	790days	-2.50127	0.012375	0.07425	ns
Tetranor-12R-HETE	2-10days	834days	-2.64733	0.00811312	0.0649049	ns
Tetranor-12R-HETE	2-10days	872days	1.66143	0.0966281	0.483141	ns
Tetranor-12R-HETE	219days	790days	-0.69282	0.488422	1	ns
Tetranor-12R-HETE	219days	834days	-0.80829	0.418923	1	ns
Tetranor-12R-HETE	219days	872days	2.59808	0.00937477	0.0656234	ns
Tetranor-12R-HETE	790days	834days	-0.11547	0.908073	1	ns
Tetranor-12R-HETE	790days	872days	3.2909	0.000998686	0.00898818	**
Tetranor-12R-HETE	834days	872days	3.40637	0.000658337	0.00658337	**
trans-10-Heptadecenoic acid	2-10days	219days	-0.785069	0.432413	1	ns
trans-10-Heptadecenoic acid	2-10days	790days	-1.29628	0.19488	1	ns
trans-10-Heptadecenoic acid	2-10days	834days	-1.36931	0.170904	1	ns
trans-10-Heptadecenoic acid	2-10days	872days	2.13612	0.0326698	0.228689	ns
trans-10-Heptadecenoic acid	219days	790days	-0.404145	0.686106	1	ns
trans-10-Heptadecenoic acid	219days	834days	-0.46188	0.644167	1	ns
trans-10-Heptadecenoic acid	219days	872days	2.3094	0.0209213	0.167371	ns
trans-10-Heptadecenoic acid	790days	834days	-0.057735	0.95396	1	ns
trans-10-Heptadecenoic acid	790days	872days	2.71355	0.00665673	0.0599105	ns
trans-10-Heptadecenoic acid	834days	872days	2.77128	0.00558362	0.0558362	ns
trans-Petroselinic acid	2-10days	219days	-2.86641	0.0041515	0.0373635	*
trans-Petroselinic acid	2-10days	790days	-0.967643	0.333223	0.999668	ns
trans-Petroselinic acid	2-10days	834days	-2.13612	0.0326698	0.228689	ns
trans-Petroselinic acid	2-10days	872days	1.44234	0.149208	0.666635	ns
trans-Petroselinic acid	219days	790days	1.50111	0.133327	0.666635	ns
trans-Petroselinic acid	219days	834days	0.57735	0.563703	0.999668	ns
trans-Petroselinic acid	219days	872days	3.40637	0.000658337	0.00658337	**
trans-Petroselinic acid	790days	834days	-0.92376	0.355611	0.999668	ns
trans-Petroselinic acid	790days	872days	1.90526	0.0567468	0.340481	ns
trans-Petroselinic acid	834days	872days	2.82902	0.00466913	0.0373635	*
Triethanolamine	2-10days	219days	1.40582	0.159777	0.639109	ns
Triethanolamine	2-10days	790days	-1.07719	0.281396	0.844189	ns
Triethanolamine	2-10days	834days	2.35521	0.0185124	0.129587	ns
Triethanolamine	2-10days	872days	-2.24566	0.0247256	0.148354	ns
Triethanolamine	219days	790days	-1.96299	0.0496472	0.248236	ns
Triethanolamine	219days	834days	0.750555	0.45292	0.844189	ns
Triethanolamine	219days	872days	-2.88675	0.00389242	0.0350318	*
Triethanolamine	790days	834days	2.71355	0.00665673	0.0532538	ns
Triethanolamine	790days	872days	-0.92376	0.355611	0.844189	ns
Triethanolamine	834days	872days	-3.63731	0.000275504	0.00275504	**
Uracil	2-10days	219days	-2.9577	0.00309942	0.0278948	*
Uracil	2-10days	790days	-2.22741	0.0259202	0.207362	ns
Uracil	2-10days	834days	-1.7162	0.0861259	0.602882	ns
Uracil	2-10days	872days	-3.61497	0.000300384	0.00300384	**
Uracil	219days	790days	0.57735	0.563703	1	ns
Uracil	219days	834days	0.981495	0.326348	1	ns
Uracil	219days	872days	-0.519615	0.603332	1	ns
Uracil	790days	834days	0.404145	0.686106	1	ns
Uracil	790days	872days	-1.09697	0.272656	1	ns
Uracil	834days	872days	-1.50111	0.133327	0.799962	ns
Urocanic acid	2-10days	219days	1.57014	0.116383	0.581915	ns
Urocanic acid	2-10days	790days	-0.912871	0.36131	1	ns
Urocanic acid	2-10days	834days	2.51952	0.0117514	0.094011	ns
Urocanic acid	2-10days	872days	-1.42408	0.154424	0.617695	ns
Urocanic acid	219days	790days	-1.96299	0.0496472	0.297883	ns
Urocanic acid	219days	834days	0.750555	0.45292	1	ns
Urocanic acid	219days	872days	-2.36714	0.0179263	0.125484	ns
Urocanic acid	790days	834days	2.71355	0.00665673	0.0599105	ns
Urocanic acid	790days	872days	-0.404145	0.686106	1	ns
Urocanic acid	834days	872days	-3.11769	0.00182274	0.0182274	*
Xanthine	2-10days	219days	-0.292119	0.770196	1	ns
Xanthine	2-10days	790days	-2.19089	0.0284597	0.284597	ns
Xanthine	2-10days	834days	-1.67968	0.0930191	0.744153	ns
Xanthine	2-10days	872days	0.365148	0.715001	1	ns
Xanthine	219days	790days	-1.50111	0.133327	0.799962	ns
Xanthine	219days	834days	-1.09697	0.272656	1	ns
Xanthine	219days	872days	0.519615	0.603332	1	ns
Xanthine	790days	834days	0.404145	0.686106	1	ns
Xanthine	790days	872days	2.02073	0.0433081	0.389773	ns
Xanthine	834days	872days	1.61658	0.105969	0.744153	ns

## Sheet: Lip_KW
variable	n	statistic	df	p	method	p.signif
Cer(d12:0_18:1)+HCOO	24	14.9933	4	0.00472	Kruskal-Wallis	**
Cer(d13:0_22:0)+HCOO	24	12.4467	4	0.0143	Kruskal-Wallis	*
Cer(d14:2_22:0)+HCOO	24	16.4405	4	0.00248	Kruskal-Wallis	**
Cer(d15:0_20:2)+HCOO	24	11.8733	4	0.0183	Kruskal-Wallis	*
Cer(d15:0_22:1)+HCOO	24	13.8467	4	0.0078	Kruskal-Wallis	**
Cer(d15:0_26:3)+HCOO	24	18.1933	4	0.00113	Kruskal-Wallis	**
Cer(d16:1_16:0)+HCOO	24	17.1267	4	0.00183	Kruskal-Wallis	**
Cer(d16:1_16:1)+HCOO	24	19.74	4	0.000562	Kruskal-Wallis	***
Cer(d16:1_18:1)+HCOO	24	13.8	4	0.00796	Kruskal-Wallis	**
Cer(d16:1_24:2)+HCOO	24	18.3817	4	0.00104	Kruskal-Wallis	**
Cer(d16:2_22:0)+HCOO	24	17.5491	4	0.00151	Kruskal-Wallis	**
Cer(d16:2_22:0+O)+HCOO	24	13.3933	4	0.00951	Kruskal-Wallis	**
Cer(d17:1_14:0)+HCOO	24	18.5867	4	0.000947	Kruskal-Wallis	***
Cer(d17:1_16:0)+HCOO	24	15.0133	4	0.00467	Kruskal-Wallis	**
Cer(d17:1_22:0)+HCOO	24	16.995	4	0.00194	Kruskal-Wallis	**
Cer(d17:1_24:1)+HCOO	24	14.7283	4	0.0053	Kruskal-Wallis	**
Cer(d18:0_16:0)+HCOO	24	15.5017	4	0.00377	Kruskal-Wallis	**
Cer(d18:0_18:0)+HCOO	24	11.275	4	0.0236	Kruskal-Wallis	*
Cer(d18:0_24:0)+HCOO	24	10.8067	4	0.0288	Kruskal-Wallis	*
Cer(d18:0_24:1)+HCOO	24	13.0133	4	0.0112	Kruskal-Wallis	*
Cer(d18:1_16:0)+HCOO	24	18.3	4	0.00108	Kruskal-Wallis	**
Cer(d18:1_16:0)-H	24	18.7267	4	0.000889	Kruskal-Wallis	***
Cer(d18:1_17:0)+HCOO	24	15.755	4	0.00337	Kruskal-Wallis	**
Cer(d18:1_18:0)+HCOO	24	16.635	4	0.00228	Kruskal-Wallis	**
Cer(d18:1_18:1)+HCOO	24	11.8933	4	0.0182	Kruskal-Wallis	*
Cer(d18:1_18:2)+HCOO	24	8.70167	4	0.069	Kruskal-Wallis	ns
Cer(d18:1_20:0)+HCOO	24	18.38	4	0.00104	Kruskal-Wallis	**
Cer(d18:1_22:0)+HCOO	24	16.7283	4	0.00218	Kruskal-Wallis	**
Cer(d18:1_22:0)-H	24	16.6733	4	0.00224	Kruskal-Wallis	**
Cer(d18:1_23:0)+HCOO	24	15.6067	4	0.0036	Kruskal-Wallis	**
Cer(d18:1_24:0)+HCOO	24	13.9733	4	0.00738	Kruskal-Wallis	**
Cer(d18:1_24:0)-H	24	12.6467	4	0.0131	Kruskal-Wallis	*
Cer(d18:1_24:1)+HCOO	24	10.3017	4	0.0356	Kruskal-Wallis	*
Cer(d18:1_24:1)-H	24	15.3817	4	0.00397	Kruskal-Wallis	**
Cer(d18:1_24:2)+HCOO	24	17.8483	4	0.00132	Kruskal-Wallis	**
Cer(d18:1_25:0)+HCOO	24	8.62167	4	0.0713	Kruskal-Wallis	ns
Cer(d18:1_26:0)+HCOO	24	6.595	4	0.159	Kruskal-Wallis	ns
Cer(d18:1_26:2)+HCOO	24	13.02	4	0.0112	Kruskal-Wallis	*
Cer(d18:2_16:0)+HCOO	24	17.7333	4	0.00139	Kruskal-Wallis	**
Cer(d18:2_18:0)-H	24	21.9753	4	0.000203	Kruskal-Wallis	***
Cer(d18:2_18:2)+HCOO	24	17.0279	4	0.00191	Kruskal-Wallis	**
Cer(d18:2_20:0)+HCOO	24	13.755	4	0.00812	Kruskal-Wallis	**
Cer(d18:2_21:0)+HCOO	24	16.715	4	0.0022	Kruskal-Wallis	**
Cer(d18:2_22:0)+HCOO	24	19.475	4	0.000634	Kruskal-Wallis	***
Cer(d18:2_23:0)+HCOO	24	17.7683	4	0.00137	Kruskal-Wallis	**
Cer(d18:2_24:2)+HCOO	24	17.34	4	0.00166	Kruskal-Wallis	**
Cer(d19:1_24:0)+HCOO	24	12.6067	4	0.0134	Kruskal-Wallis	*
Cer(d20:0_21:0)+HCOO	24	12.8067	4	0.0123	Kruskal-Wallis	*
Cer(d20:0_25:0)+HCOO	24	15.3133	4	0.00409	Kruskal-Wallis	**
Cer(d24:2_18:1)+HCOO	24	4.13333	4	0.388	Kruskal-Wallis	ns
Cer(m17:1_25:0)+HCOO	24	17.2217	4	0.00175	Kruskal-Wallis	**
Cer(t16:1_23:0)+HCOO	24	20.4786	4	0.000402	Kruskal-Wallis	***
Cer(t16:1_24:1)+HCOO	24	11.835	4	0.0186	Kruskal-Wallis	*
Cer(t16:1_26:2)+HCOO	24	13.4883	4	0.00912	Kruskal-Wallis	**
Cer(t17:0_17:0+O)+HCOO	24	19.8733	4	0.000529	Kruskal-Wallis	***
Cer(t17:0_19:1)+HCOO	24	20.018	4	0.000495	Kruskal-Wallis	***
Cer(t17:0_24:0+O)+HCOO	24	17.1817	4	0.00178	Kruskal-Wallis	**
Cer(t17:0_25:0+O)+HCOO	24	19.8733	4	0.000529	Kruskal-Wallis	***
Cer(t17:1_15:0)+HCOO	24	16.248	4	0.0027	Kruskal-Wallis	**
Cer(t17:1_18:1)+HCOO	24	20.7374	4	0.000357	Kruskal-Wallis	***
Cer(t17:1_23:0+O)+HCOO	24	18.2479	4	0.0011	Kruskal-Wallis	**
Cer(t17:1_24:1)+HCOO	24	9.91057	4	0.042	Kruskal-Wallis	*
Cer(t17:1_25:0+O)+HCOO	24	19.8733	4	0.000529	Kruskal-Wallis	***
Cer(t18:0_16:0)+HCOO	24	15.6533	4	0.00352	Kruskal-Wallis	**
Cer(t18:0_18:0+O)+HCOO	24	17.4476	4	0.00158	Kruskal-Wallis	**
Cer(t18:0_18:1)+HCOO	24	14.2883	4	0.00643	Kruskal-Wallis	**
Cer(t18:0_20:0)+HCOO	24	17.1267	4	0.00183	Kruskal-Wallis	**
Cer(t18:0_20:0+O)+HCOO	24	17.0867	4	0.00186	Kruskal-Wallis	**
Cer(t18:0_23:0)+HCOO	24	18.5667	4	0.000956	Kruskal-Wallis	***
Cer(t18:0_24:0)+HCOO	24	19.2267	4	0.000709	Kruskal-Wallis	***
Cer(t18:0_24:2)+HCOO	24	17.28	4	0.00171	Kruskal-Wallis	**
Cer(t18:0_25:0)+HCOO	24	17.955	4	0.00126	Kruskal-Wallis	**
Cer(t18:0_25:0+O)+HCOO	24	17.6883	4	0.00142	Kruskal-Wallis	**
Cer(t18:0_26:0)+HCOO	24	18.48	4	0.000994	Kruskal-Wallis	***
Cer(t18:0_26:0+O)+HCOO	24	17.355	4	0.00165	Kruskal-Wallis	**
Cer(t18:1_14:0)+HCOO	24	12.8217	4	0.0122	Kruskal-Wallis	*
Cer(t18:1_15:0)+HCOO	24	16.0883	4	0.0029	Kruskal-Wallis	**
Cer(t18:1_24:1)+HCOO	24	13.2217	4	0.0102	Kruskal-Wallis	*
Cer(t18:1_26:0)+HCOO	24	15.7333	4	0.0034	Kruskal-Wallis	**
Cer(t18:1_26:0+O)+HCOO	24	16.7733	4	0.00214	Kruskal-Wallis	**
Cer(t20:0_25:0)+HCOO	24	16.6083	4	0.0023	Kruskal-Wallis	**
Cer(t20:0_26:0)+HCOO	24	14.5333	4	0.00577	Kruskal-Wallis	**
Cer(t20:1_17:0)+HCOO	24	19.9082	4	0.000521	Kruskal-Wallis	***
Hex1Cer(d18:1_16:0)+HCOO	24	14.2533	4	0.00653	Kruskal-Wallis	**
Hex1Cer(d18:1_22:0)+HCOO	24	18.9683	4	0.000797	Kruskal-Wallis	***
Hex1Cer(d18:1_23:0)+HCOO	24	15.9667	4	0.00306	Kruskal-Wallis	**
Hex1Cer(d18:1_24:0)+HCOO	24	18.7733	4	0.000871	Kruskal-Wallis	***
Hex1Cer(d18:1_24:1)+HCOO	24	14.72	4	0.00532	Kruskal-Wallis	**
Hex2Cer(d16:0_18:1)+HCOO	24	18.9683	4	0.000797	Kruskal-Wallis	***
Hex2Cer(d18:1_24:0)+HCOO	24	18.48	4	0.000994	Kruskal-Wallis	***
Hex2Cer(d18:1_24:1)+HCOO	24	19.4133	4	0.000652	Kruskal-Wallis	***
LPC(14:0)+HCOO	24	17.6651	4	0.00143	Kruskal-Wallis	**
LPC(15:0)+HCOO	24	17.4467	4	0.00158	Kruskal-Wallis	**
LPC(16:0)+HCOO	24	19.74	4	0.000562	Kruskal-Wallis	***
LPC(16:0)-CH3	24	19.1734	4	0.000727	Kruskal-Wallis	***
LPC(16:1)+HCOO	24	17.8782	4	0.0013	Kruskal-Wallis	**
LPC(17:0)+HCOO	24	19.1149	4	0.000746	Kruskal-Wallis	***
LPC(18:0)+HCOO	24	19.5533	4	0.000612	Kruskal-Wallis	***
LPC(18:1)+HCOO	24	19.4733	4	0.000634	Kruskal-Wallis	***
LPC(18:2)+HCOO	24	19.2483	4	0.000702	Kruskal-Wallis	***
LPC(19:0)+HCOO	24	18.94	4	0.000808	Kruskal-Wallis	***
LPC(20:4)+HCOO	24	19.6442	4	0.000587	Kruskal-Wallis	***
LPE(16:0)-H	24	16.62	4	0.00229	Kruskal-Wallis	**
LPE(16:1e)-H	24	17.7683	4	0.00137	Kruskal-Wallis	**
LPE(18:0)-H	24	19.98	4	0.000504	Kruskal-Wallis	***
LPE(18:1)-H	24	16.9417	4	0.00198	Kruskal-Wallis	**
LPE(18:1e)-H	24	19.7133	4	0.000569	Kruskal-Wallis	***
LPE(18:2)-H	24	16.5336	4	0.00238	Kruskal-Wallis	**
LPE(18:2e)-H	24	17.8544	4	0.00132	Kruskal-Wallis	**
LPI(18:0)-H	24	17.66	4	0.00144	Kruskal-Wallis	**
LPS(18:0)-H	24	19.6528	4	0.000585	Kruskal-Wallis	***
PC(16:0_14:0)+HCOO	24	18.3798	4	0.00104	Kruskal-Wallis	**
PC(16:0_16:0)+HCOO	24	19.74	4	0.000562	Kruskal-Wallis	***
PC(16:0_16:1)+HCOO	24	17.2267	4	0.00175	Kruskal-Wallis	**
PC(16:0_18:1)+HCOO	24	17.715	4	0.0014	Kruskal-Wallis	**
PC(16:0_18:2)+HCOO	24	19.74	4	0.000562	Kruskal-Wallis	***
PC(16:0_20:4)+HCOO	24	19.1133	4	0.000747	Kruskal-Wallis	***
PC(16:1_14:0)-CH3	24	19.6152	4	0.000595	Kruskal-Wallis	***
PC(16:1_18:2)+HCOO	24	13.7544	4	0.00812	Kruskal-Wallis	**
PC(16:1e_16:0)+HCOO	24	18.9933	4	0.000788	Kruskal-Wallis	***
PC(16:1e_20:4)+HCOO	24	19.9404	4	0.000513	Kruskal-Wallis	***
PC(18:0_16:0)+HCOO	24	19.98	4	0.000504	Kruskal-Wallis	***
PC(18:0_18:1)+HCOO	24	18.2883	4	0.00108	Kruskal-Wallis	**
PC(18:0_18:2)+HCOO	24	15.6333	4	0.00355	Kruskal-Wallis	**
PC(18:0_20:4)+HCOO	24	19.3717	4	0.000664	Kruskal-Wallis	***
PC(18:1_18:1)+HCOO	24	13.9267	4	0.00753	Kruskal-Wallis	**
PC(18:1_18:2)+HCOO	24	11.7333	4	0.0194	Kruskal-Wallis	*
PC(18:1e_16:0)+HCOO	24	18.94	4	0.000808	Kruskal-Wallis	***
PC(18:2_18:2)+HCOO	24	11.7735	4	0.0191	Kruskal-Wallis	*
PC(19:1_18:1)+HCOO	24	14.0083	4	0.00727	Kruskal-Wallis	**
PC(19:1_18:1)-CH3	24	18.2883	4	0.00108	Kruskal-Wallis	**
PC(19:1_19:1)+HCOO	24	10.8883	4	0.0278	Kruskal-Wallis	*
PE(15:0_16:0)-H	24	20.4786	4	0.000402	Kruskal-Wallis	***
PE(15:0_18:1)-H	24	18.8619	4	0.000837	Kruskal-Wallis	***
PE(16:0_16:0)-H	24	16.4985	4	0.00242	Kruskal-Wallis	**
PE(16:0_16:1)-H	24	19.6152	4	0.000595	Kruskal-Wallis	***
PE(16:0_18:1)-H	24	14.1817	4	0.00674	Kruskal-Wallis	**
PE(16:0_19:0)-H	24	21.0088	4	0.000315	Kruskal-Wallis	***
PE(16:1_14:0)-H	24	17.8039	4	0.00135	Kruskal-Wallis	**
PE(16:1_16:1)-H	24	15.915	4	0.00314	Kruskal-Wallis	**
PE(16:1_18:1)-H	24	19.8262	4	0.00054	Kruskal-Wallis	***
PE(16:1_19:0)-H	24	19.323	4	0.000679	Kruskal-Wallis	***
PE(16:1e_20:4)-H	24	19.7652	4	0.000556	Kruskal-Wallis	***
PE(17:1_15:0)-H	24	11.2036	4	0.0244	Kruskal-Wallis	*
PE(18:0_18:1)-H	24	14.6217	4	0.00555	Kruskal-Wallis	**
PE(18:0_20:4)-H	24	19.7406	4	0.000562	Kruskal-Wallis	***
PE(18:1_18:1)-H	24	17.355	4	0.00165	Kruskal-Wallis	**
PE(18:1e_20:4)-H	24	18.9343	4	0.00081	Kruskal-Wallis	***
PE(18:2_18:2)-H	24	14.3584	4	0.00623	Kruskal-Wallis	**
PE(19:1_16:0)-H	24	18.0883	4	0.00119	Kruskal-Wallis	**
PE(19:1_18:1)-H	24	14.22	4	0.00663	Kruskal-Wallis	**
PE(19:1_19:1)-H	24	14.3984	4	0.00613	Kruskal-Wallis	**
PE(19:1_20:1)-H	24	17.6883	4	0.00142	Kruskal-Wallis	**
PG(15:0_15:0)-H	24	18.2133	4	0.00112	Kruskal-Wallis	**
PG(15:0_16:0)-H	24	11.3015	4	0.0234	Kruskal-Wallis	*
PG(15:0_17:0)-H	24	18.4797	4	0.000994	Kruskal-Wallis	***
PG(16:0_16:0)-H	24	18.5122	4	0.00098	Kruskal-Wallis	***
PG(16:0_16:1)-H	24	15.6483	4	0.00353	Kruskal-Wallis	**
PG(16:0_18:1)-H	24	14.2733	4	0.00647	Kruskal-Wallis	**
PG(17:1_16:0)-H	24	15.2526	4	0.0042	Kruskal-Wallis	**
PG(18:0_18:1)-H	24	18.4021	4	0.00103	Kruskal-Wallis	**
PG(18:1_18:1)-H	24	18.7267	4	0.000889	Kruskal-Wallis	***
PG(19:1_18:1)-H	24	13.4405	4	0.00931	Kruskal-Wallis	**
PI(16:0_16:0)-H	24	16.7825	4	0.00213	Kruskal-Wallis	**
PI(16:0_17:0)-H	24	17.4921	4	0.00155	Kruskal-Wallis	**
PI(16:0_18:1)-H	24	9.88833	4	0.0424	Kruskal-Wallis	*
PI(16:0_19:0)-H	24	16.6811	4	0.00223	Kruskal-Wallis	**
PI(17:0_17:0)-H	24	17.1211	4	0.00183	Kruskal-Wallis	**
PI(18:0_20:4)-H	24	19.9404	4	0.000513	Kruskal-Wallis	***
PS(18:0_18:1)-H	24	19.7098	4	0.00057	Kruskal-Wallis	***

## Sheet: Lip_Dunn
variable	group1	group2	statistic	p	p.adj	p.adj.signif
Cer(d12:0_18:1)+HCOO	2-10days	219days	-2.22741	0.0259202	0.181441	ns
Cer(d12:0_18:1)+HCOO	2-10days	790days	-1.27802	0.201243	0.80497	ns
Cer(d12:0_18:1)+HCOO	2-10days	834days	-1.86226	0.0625669	0.375401	ns
Cer(d12:0_18:1)+HCOO	2-10days	872days	1.86226	0.0625669	0.375401	ns
Cer(d12:0_18:1)+HCOO	219days	790days	0.750555	0.45292	1	ns
Cer(d12:0_18:1)+HCOO	219days	834days	0.288675	0.77283	1	ns
Cer(d12:0_18:1)+HCOO	219days	872days	3.23316	0.00122428	0.0122428	*
Cer(d12:0_18:1)+HCOO	790days	834days	-0.46188	0.644167	1	ns
Cer(d12:0_18:1)+HCOO	790days	872days	2.48261	0.0130425	0.10434	ns
Cer(d12:0_18:1)+HCOO	834days	872days	2.94449	0.00323491	0.0291142	*
Cer(d13:0_22:0)+HCOO	2-10days	219days	-0.182574	0.855132	1	ns
Cer(d13:0_22:0)+HCOO	2-10days	790days	-1.05893	0.289632	1	ns
Cer(d13:0_22:0)+HCOO	2-10days	834days	-2.08135	0.0374023	0.261816	ns
Cer(d13:0_22:0)+HCOO	2-10days	872days	2.15438	0.0312107	0.249686	ns
Cer(d13:0_22:0)+HCOO	219days	790days	-0.69282	0.488422	1	ns
Cer(d13:0_22:0)+HCOO	219days	834days	-1.50111	0.133327	0.666635	ns
Cer(d13:0_22:0)+HCOO	219days	872days	1.84752	0.0646717	0.38803	ns
Cer(d13:0_22:0)+HCOO	790days	834days	-0.80829	0.418923	1	ns
Cer(d13:0_22:0)+HCOO	790days	872days	2.54034	0.0110744	0.0996699	ns
Cer(d13:0_22:0)+HCOO	834days	872days	3.34863	0.000812117	0.00812117	**
Cer(d14:2_22:0)+HCOO	2-10days	219days	3.32357	0.000888722	0.00888722	**
Cer(d14:2_22:0)+HCOO	2-10days	790days	0.401751	0.687868	1	ns
Cer(d14:2_22:0)+HCOO	2-10days	834days	1.78962	0.0735156	0.51398	ns
Cer(d14:2_22:0)+HCOO	2-10days	872days	2.66616	0.00767225	0.0690503	ns
Cer(d14:2_22:0)+HCOO	219days	790days	-2.3099	0.0208935	0.167148	ns
Cer(d14:2_22:0)+HCOO	219days	834days	-1.2127	0.225245	1	ns
Cer(d14:2_22:0)+HCOO	219days	872days	-0.519728	0.603253	1	ns
Cer(d14:2_22:0)+HCOO	790days	834days	1.0972	0.272552	1	ns
Cer(d14:2_22:0)+HCOO	790days	872days	1.79018	0.0734258	0.51398	ns
Cer(d14:2_22:0)+HCOO	834days	872days	0.692971	0.488328	1	ns
Cer(d15:0_20:2)+HCOO	2-10days	219days	-1.57014	0.116383	0.602089	ns
Cer(d15:0_20:2)+HCOO	2-10days	790days	-0.620752	0.534763	1	ns
Cer(d15:0_20:2)+HCOO	2-10days	834days	-1.64317	0.100348	0.602089	ns
Cer(d15:0_20:2)+HCOO	2-10days	872days	2.08135	0.0374023	0.261816	ns
Cer(d15:0_20:2)+HCOO	219days	790days	0.750555	0.45292	1	ns
Cer(d15:0_20:2)+HCOO	219days	834days	-0.057735	0.95396	1	ns
Cer(d15:0_20:2)+HCOO	219days	872days	2.88675	0.00389242	0.0350318	*
Cer(d15:0_20:2)+HCOO	790days	834days	-0.80829	0.418923	1	ns
Cer(d15:0_20:2)+HCOO	790days	872days	2.1362	0.0326634	0.261308	ns
Cer(d15:0_20:2)+HCOO	834days	872days	2.94449	0.00323491	0.0323491	*
Cer(d15:0_22:1)+HCOO	2-10days	219days	-0.547723	0.583882	1	ns
Cer(d15:0_22:1)+HCOO	2-10days	790days	-1.57014	0.116383	0.581915	ns
Cer(d15:0_22:1)+HCOO	2-10days	834days	-2.22741	0.0259202	0.207362	ns
Cer(d15:0_22:1)+HCOO	2-10days	872days	2.00832	0.0446097	0.303157	ns
Cer(d15:0_22:1)+HCOO	219days	790days	-0.80829	0.418923	1	ns
Cer(d15:0_22:1)+HCOO	219days	834days	-1.32791	0.184209	0.736837	ns
Cer(d15:0_22:1)+HCOO	219days	872days	2.02073	0.0433081	0.303157	ns
Cer(d15:0_22:1)+HCOO	790days	834days	-0.519615	0.603332	1	ns
Cer(d15:0_22:1)+HCOO	790days	872days	2.82902	0.00466913	0.0420222	*
Cer(d15:0_22:1)+HCOO	834days	872days	3.34863	0.000812117	0.00812117	**
Cer(d15:0_26:3)+HCOO	2-10days	219days	-2.59255	0.00952664	0.0762131	ns
Cer(d15:0_26:3)+HCOO	2-10days	790days	-1.93529	0.0529552	0.264776	ns
Cer(d15:0_26:3)+HCOO	2-10days	834days	-2.59255	0.00952664	0.0762131	ns
Cer(d15:0_26:3)+HCOO	2-10days	872days	1.27802	0.201243	0.80497	ns
Cer(d15:0_26:3)+HCOO	219days	790days	0.519615	0.603332	1	ns
Cer(d15:0_26:3)+HCOO	219days	834days	0	1	1	ns
Cer(d15:0_26:3)+HCOO	219days	872days	3.05996	0.00221369	0.0221369	*
Cer(d15:0_26:3)+HCOO	790days	834days	-0.519615	0.603332	1	ns
Cer(d15:0_26:3)+HCOO	790days	872days	2.54034	0.0110744	0.0762131	ns
Cer(d15:0_26:3)+HCOO	834days	872days	3.05996	0.00221369	0.0221369	*
Cer(d16:1_16:0)+HCOO	2-10days	219days	-3.03073	0.00243962	0.0219566	*
Cer(d16:1_16:0)+HCOO	2-10days	790days	-1.64317	0.100348	0.501741	ns
Cer(d16:1_16:0)+HCOO	2-10days	834days	-2.22741	0.0259202	0.181441	ns
Cer(d16:1_16:0)+HCOO	2-10days	872days	1.05893	0.289632	1	ns
Cer(d16:1_16:0)+HCOO	219days	790days	1.09697	0.272656	1	ns
Cer(d16:1_16:0)+HCOO	219days	834days	0.635085	0.525373	1	ns
Cer(d16:1_16:0)+HCOO	219days	872days	3.23316	0.00122428	0.0122428	*
Cer(d16:1_16:0)+HCOO	790days	834days	-0.46188	0.644167	1	ns
Cer(d16:1_16:0)+HCOO	790days	872days	2.1362	0.0326634	0.195981	ns
Cer(d16:1_16:0)+HCOO	834days	872days	2.59808	0.00937477	0.0749981	ns
Cer(d16:1_16:1)+HCOO	2-10days	219days	-2.9577	0.00309942	0.0278948	*
Cer(d16:1_16:1)+HCOO	2-10days	790days	-1.86226	0.0625669	0.312835	ns
Cer(d16:1_16:1)+HCOO	2-10days	834days	-2.08135	0.0374023	0.224414	ns
Cer(d16:1_16:1)+HCOO	2-10days	872days	1.64317	0.100348	0.401393	ns
Cer(d16:1_16:1)+HCOO	219days	790days	0.866025	0.386476	1	ns
Cer(d16:1_16:1)+HCOO	219days	834days	0.69282	0.488422	1	ns
Cer(d16:1_16:1)+HCOO	219days	872days	3.63731	0.000275504	0.00275504	**
Cer(d16:1_16:1)+HCOO	790days	834days	-0.173205	0.86249	1	ns
Cer(d16:1_16:1)+HCOO	790days	872days	2.77128	0.00558362	0.0390853	*
Cer(d16:1_16:1)+HCOO	834days	872days	2.94449	0.00323491	0.0278948	*
Cer(d16:1_18:1)+HCOO	2-10days	219days	-3.21331	0.00131217	0.0131217	*
Cer(d16:1_18:1)+HCOO	2-10days	790days	-0.438178	0.661257	1	ns
Cer(d16:1_18:1)+HCOO	2-10days	834days	-1.31453	0.188667	0.943333	ns
Cer(d16:1_18:1)+HCOO	2-10days	872days	-2.33695	0.0194418	0.174976	ns
Cer(d16:1_18:1)+HCOO	219days	790days	2.19393	0.0282404	0.225923	ns
Cer(d16:1_18:1)+HCOO	219days	834days	1.50111	0.133327	0.933289	ns
Cer(d16:1_18:1)+HCOO	219days	872days	0.69282	0.488422	1	ns
Cer(d16:1_18:1)+HCOO	790days	834days	-0.69282	0.488422	1	ns
Cer(d16:1_18:1)+HCOO	790days	872days	-1.50111	0.133327	0.933289	ns
Cer(d16:1_18:1)+HCOO	834days	872days	-0.80829	0.418923	1	ns
Cer(d16:1_24:2)+HCOO	2-10days	219days	-2.8299	0.00465626	0.0372501	*
Cer(d16:1_24:2)+HCOO	2-10days	790days	-1.51537	0.12968	0.648399	ns
Cer(d16:1_24:2)+HCOO	2-10days	834days	-2.46475	0.0137108	0.0959758	ns
Cer(d16:1_24:2)+HCOO	2-10days	872days	1.40582	0.159777	0.648399	ns
Cer(d16:1_24:2)+HCOO	219days	790days	1.03923	0.298698	0.896093	ns
Cer(d16:1_24:2)+HCOO	219days	834days	0.288675	0.77283	0.905841	ns
Cer(d16:1_24:2)+HCOO	219days	872days	3.34863	0.000812117	0.00812117	**
Cer(d16:1_24:2)+HCOO	790days	834days	-0.750555	0.45292	0.905841	ns
Cer(d16:1_24:2)+HCOO	790days	872days	2.3094	0.0209213	0.125528	ns
Cer(d16:1_24:2)+HCOO	834days	872days	3.05996	0.00221369	0.0199232	*
Cer(d16:2_22:0)+HCOO	2-10days	219days	3.32083	0.000897508	0.00897508	**
Cer(d16:2_22:0)+HCOO	2-10days	790days	0.0459948	0.963314	1	ns
Cer(d16:2_22:0)+HCOO	2-10days	834days	1.99618	0.0459147	0.275488	ns
Cer(d16:2_22:0)+HCOO	2-10days	872days	2.6585	0.00784888	0.0706399	ns
Cer(d16:2_22:0)+HCOO	219days	790days	-2.58898	0.00962598	0.0770079	ns
Cer(d16:2_22:0)+HCOO	219days	834days	-1.04723	0.294994	1	ns
Cer(d16:2_22:0)+HCOO	219days	872days	-0.523615	0.600547	1	ns
Cer(d16:2_22:0)+HCOO	790days	834days	1.54175	0.123133	0.615667	ns
Cer(d16:2_22:0)+HCOO	790days	872days	2.06537	0.0388882	0.272217	ns
Cer(d16:2_22:0)+HCOO	834days	872days	0.523615	0.600547	1	ns
Cer(d16:2_22:0+O)+HCOO	2-10days	219days	2.59255	0.00952664	0.0857397	ns
Cer(d16:2_22:0+O)+HCOO	2-10days	790days	1.13196	0.257651	1	ns
Cer(d16:2_22:0+O)+HCOO	2-10days	834days	0.328634	0.742433	1	ns
Cer(d16:2_22:0+O)+HCOO	2-10days	872days	2.9577	0.00309942	0.0309942	*
Cer(d16:2_22:0+O)+HCOO	219days	790days	-1.1547	0.248213	1	ns
Cer(d16:2_22:0+O)+HCOO	219days	834days	-1.78979	0.0734883	0.514418	ns
Cer(d16:2_22:0+O)+HCOO	219days	872days	0.288675	0.77283	1	ns
Cer(d16:2_22:0+O)+HCOO	790days	834days	-0.635085	0.525373	1	ns
Cer(d16:2_22:0+O)+HCOO	790days	872days	1.44338	0.148915	0.893488	ns
Cer(d16:2_22:0+O)+HCOO	834days	872days	2.07846	0.0376669	0.301335	ns
Cer(d17:1_14:0)+HCOO	2-10days	219days	2.33695	0.0194418	0.116651	ns
Cer(d17:1_14:0)+HCOO	2-10days	790days	-1.53362	0.125122	0.432522	ns
Cer(d17:1_14:0)+HCOO	2-10days	834days	-2.11786	0.0341869	0.170934	ns
Cer(d17:1_14:0)+HCOO	2-10days	872days	1.60665	0.108131	0.432522	ns
Cer(d17:1_14:0)+HCOO	219days	790days	-3.05996	0.00221369	0.0199232	*
Cer(d17:1_14:0)+HCOO	219days	834days	-3.52184	0.000428568	0.00428568	**
Cer(d17:1_14:0)+HCOO	219days	872days	-0.57735	0.563703	1	ns
Cer(d17:1_14:0)+HCOO	790days	834days	-0.46188	0.644167	1	ns
Cer(d17:1_14:0)+HCOO	790days	872days	2.48261	0.0130425	0.0912976	ns
Cer(d17:1_14:0)+HCOO	834days	872days	2.94449	0.00323491	0.0258793	*
Cer(d17:1_16:0)+HCOO	2-10days	219days	-2.33695	0.0194418	0.136093	ns
Cer(d17:1_16:0)+HCOO	2-10days	790days	-1.38756	0.16527	0.82635	ns
Cer(d17:1_16:0)+HCOO	2-10days	834days	-2.48301	0.0130278	0.104222	ns
Cer(d17:1_16:0)+HCOO	2-10days	872days	1.2415	0.214419	0.857678	ns
Cer(d17:1_16:0)+HCOO	219days	790days	0.750555	0.45292	1	ns
Cer(d17:1_16:0)+HCOO	219days	834days	-0.11547	0.908073	1	ns
Cer(d17:1_16:0)+HCOO	219days	872days	2.82902	0.00466913	0.0420222	*
Cer(d17:1_16:0)+HCOO	790days	834days	-0.866025	0.386476	1	ns
Cer(d17:1_16:0)+HCOO	790days	872days	2.07846	0.0376669	0.226002	ns
Cer(d17:1_16:0)+HCOO	834days	872days	2.94449	0.00323491	0.0323491	*
Cer(d17:1_22:0)+HCOO	2-10days	219days	-2.5743	0.0100444	0.0803554	ns
Cer(d17:1_22:0)+HCOO	2-10days	790days	-0.529465	0.596483	1	ns
Cer(d17:1_22:0)+HCOO	2-10days	834days	-2.13612	0.0326698	0.228689	ns
Cer(d17:1_22:0)+HCOO	2-10days	872days	1.88051	0.060038	0.340481	ns
Cer(d17:1_22:0)+HCOO	219days	790days	1.61658	0.105969	0.423875	ns
Cer(d17:1_22:0)+HCOO	219days	834days	0.34641	0.729034	1	ns
Cer(d17:1_22:0)+HCOO	219days	872days	3.52184	0.000428568	0.00428568	**
Cer(d17:1_22:0)+HCOO	790days	834days	-1.27017	0.204024	0.612072	ns
Cer(d17:1_22:0)+HCOO	790days	872days	1.90526	0.0567468	0.340481	ns
Cer(d17:1_22:0)+HCOO	834days	872days	3.17543	0.00149616	0.0134655	*
Cer(d17:1_24:1)+HCOO	2-10days	219days	-0.200832	0.84083	0.896093	ns
Cer(d17:1_24:1)+HCOO	2-10days	790days	-1.51537	0.12968	0.529844	ns
Cer(d17:1_24:1)+HCOO	2-10days	834days	-2.61081	0.00903278	0.0722623	ns
Cer(d17:1_24:1)+HCOO	2-10days	872days	1.844	0.0651832	0.397228	ns
Cer(d17:1_24:1)+HCOO	219days	790days	-1.03923	0.298698	0.896093	ns
Cer(d17:1_24:1)+HCOO	219days	834days	-1.90526	0.0567468	0.397228	ns
Cer(d17:1_24:1)+HCOO	219days	872days	1.61658	0.105969	0.529844	ns
Cer(d17:1_24:1)+HCOO	790days	834days	-0.866025	0.386476	0.896093	ns
Cer(d17:1_24:1)+HCOO	790days	872days	2.65581	0.00791179	0.0712061	ns
Cer(d17:1_24:1)+HCOO	834days	872days	3.52184	0.000428568	0.00428568	**
Cer(d18:0_16:0)+HCOO	2-10days	219days	-1.51537	0.12968	0.648399	ns
Cer(d18:0_16:0)+HCOO	2-10days	790days	-1.51537	0.12968	0.648399	ns
Cer(d18:0_16:0)+HCOO	2-10days	834days	-2.46475	0.0137108	0.0959758	ns
Cer(d18:0_16:0)+HCOO	2-10days	872days	1.844	0.0651832	0.391099	ns
Cer(d18:0_16:0)+HCOO	219days	790days	0	1	1	ns
Cer(d18:0_16:0)+HCOO	219days	834days	-0.750555	0.45292	1	ns
Cer(d18:0_16:0)+HCOO	219days	872days	2.65581	0.00791179	0.0712061	ns
Cer(d18:0_16:0)+HCOO	790days	834days	-0.750555	0.45292	1	ns
Cer(d18:0_16:0)+HCOO	790days	872days	2.65581	0.00791179	0.0712061	ns
Cer(d18:0_16:0)+HCOO	834days	872days	3.40637	0.000658337	0.00658337	**
Cer(d18:0_18:0)+HCOO	2-10days	219days	-0.748554	0.454126	1	ns
Cer(d18:0_18:0)+HCOO	2-10days	790days	-1.47885	0.13918	0.835081	ns
Cer(d18:0_18:0)+HCOO	2-10days	834days	-1.47885	0.13918	0.835081	ns
Cer(d18:0_18:0)+HCOO	2-10days	872days	2.0996	0.0357638	0.250346	ns
Cer(d18:0_18:0)+HCOO	219days	790days	-0.57735	0.563703	1	ns
Cer(d18:0_18:0)+HCOO	219days	834days	-0.57735	0.563703	1	ns
Cer(d18:0_18:0)+HCOO	219days	872days	2.25167	0.0243434	0.194747	ns
Cer(d18:0_18:0)+HCOO	790days	834days	0	1	1	ns
Cer(d18:0_18:0)+HCOO	790days	872days	2.82902	0.00466913	0.0466913	*
Cer(d18:0_18:0)+HCOO	834days	872days	2.82902	0.00466913	0.0466913	*
Cer(d18:0_24:0)+HCOO	2-10days	219days	0.912871	0.36131	1	ns
Cer(d18:0_24:0)+HCOO	2-10days	790days	1.93529	0.0529552	0.423641	ns
Cer(d18:0_24:0)+HCOO	2-10days	834days	2.88467	0.00391821	0.0391821	*
Cer(d18:0_24:0)+HCOO	2-10days	872days	0.109545	0.912771	1	ns
Cer(d18:0_24:0)+HCOO	219days	790days	0.80829	0.418923	1	ns
Cer(d18:0_24:0)+HCOO	219days	834days	1.55885	0.119033	0.83323	ns
Cer(d18:0_24:0)+HCOO	219days	872days	-0.635085	0.525373	1	ns
Cer(d18:0_24:0)+HCOO	790days	834days	0.750555	0.45292	1	ns
Cer(d18:0_24:0)+HCOO	790days	872days	-1.44338	0.148915	0.893488	ns
Cer(d18:0_24:0)+HCOO	834days	872days	-2.19393	0.0282404	0.254163	ns
Cer(d18:0_24:1)+HCOO	2-10days	219days	-2.84816	0.00439732	0.0395759	*
Cer(d18:0_24:1)+HCOO	2-10days	790days	-1.46059	0.144127	0.864762	ns
Cer(d18:0_24:1)+HCOO	2-10days	834days	-1.16847	0.242615	0.970461	ns
Cer(d18:0_24:1)+HCOO	2-10days	872days	1.09545	0.273322	0.970461	ns
Cer(d18:0_24:1)+HCOO	219days	790days	1.09697	0.272656	0.970461	ns
Cer(d18:0_24:1)+HCOO	219days	834days	1.32791	0.184209	0.921046	ns
Cer(d18:0_24:1)+HCOO	219days	872days	3.11769	0.00182274	0.0182274	*
Cer(d18:0_24:1)+HCOO	790days	834days	0.23094	0.817361	0.970461	ns
Cer(d18:0_24:1)+HCOO	790days	872days	2.02073	0.0433081	0.346465	ns
Cer(d18:0_24:1)+HCOO	834days	872days	1.78979	0.0734883	0.514418	ns
Cer(d18:1_16:0)+HCOO	2-10days	219days	-2.9577	0.00309942	0.0278948	*
Cer(d18:1_16:0)+HCOO	2-10days	790days	-1.42408	0.154424	0.772119	ns
Cer(d18:1_16:0)+HCOO	2-10days	834days	-2.30043	0.0214236	0.149965	ns
Cer(d18:1_16:0)+HCOO	2-10days	872days	1.42408	0.154424	0.772119	ns
Cer(d18:1_16:0)+HCOO	219days	790days	1.21244	0.225346	0.772119	ns
Cer(d18:1_16:0)+HCOO	219days	834days	0.519615	0.603332	0.976845	ns
Cer(d18:1_16:0)+HCOO	219days	872days	3.4641	0.000532006	0.00532006	**
Cer(d18:1_16:0)+HCOO	790days	834days	-0.69282	0.488422	0.976845	ns
Cer(d18:1_16:0)+HCOO	790days	872days	2.25167	0.0243434	0.149965	ns
Cer(d18:1_16:0)+HCOO	834days	872days	2.94449	0.00323491	0.0278948	*
Cer(d18:1_16:0)-H	2-10days	219days	-2.88467	0.00391821	0.0313457	*
Cer(d18:1_16:0)-H	2-10days	790days	-1.49711	0.134365	0.671825	ns
Cer(d18:1_16:0)-H	2-10days	834days	-2.37346	0.0176221	0.123355	ns
Cer(d18:1_16:0)-H	2-10days	872days	1.49711	0.134365	0.671825	ns
Cer(d18:1_16:0)-H	219days	790days	1.09697	0.272656	0.817969	ns
Cer(d18:1_16:0)-H	219days	834days	0.404145	0.686106	0.976845	ns
Cer(d18:1_16:0)-H	219days	872days	3.4641	0.000532006	0.00532006	**
Cer(d18:1_16:0)-H	790days	834days	-0.69282	0.488422	0.976845	ns
Cer(d18:1_16:0)-H	790days	872days	2.36714	0.0179263	0.123355	ns
Cer(d18:1_16:0)-H	834days	872days	3.05996	0.00221369	0.0199232	*
Cer(d18:1_17:0)+HCOO	2-10days	219days	-1.33279	0.1826	0.730401	ns
Cer(d18:1_17:0)+HCOO	2-10days	790days	-1.77097	0.0765658	0.459395	ns
Cer(d18:1_17:0)+HCOO	2-10days	834days	-2.5743	0.0100444	0.0803554	ns
Cer(d18:1_17:0)+HCOO	2-10days	872days	1.73445	0.0828374	0.459395	ns
Cer(d18:1_17:0)+HCOO	219days	790days	-0.34641	0.729034	1	ns
Cer(d18:1_17:0)+HCOO	219days	834days	-0.981495	0.326348	0.979045	ns
Cer(d18:1_17:0)+HCOO	219days	872days	2.42487	0.0153138	0.107197	ns
Cer(d18:1_17:0)+HCOO	790days	834days	-0.635085	0.525373	1	ns
Cer(d18:1_17:0)+HCOO	790days	872days	2.77128	0.00558362	0.0502526	ns
Cer(d18:1_17:0)+HCOO	834days	872days	3.40637	0.000658337	0.00658337	**
Cer(d18:1_18:0)+HCOO	2-10days	219days	-2.64733	0.00811312	0.0649049	ns
Cer(d18:1_18:0)+HCOO	2-10days	790days	-2.13612	0.0326698	0.196019	ns
Cer(d18:1_18:0)+HCOO	2-10days	834days	-1.33279	0.1826	0.730401	ns
Cer(d18:1_18:0)+HCOO	2-10days	872days	1.5884	0.112197	0.560985	ns
Cer(d18:1_18:0)+HCOO	219days	790days	0.404145	0.686106	1	ns
Cer(d18:1_18:0)+HCOO	219days	834days	1.03923	0.298698	0.896093	ns
Cer(d18:1_18:0)+HCOO	219days	872days	3.34863	0.000812117	0.00812117	**
Cer(d18:1_18:0)+HCOO	790days	834days	0.635085	0.525373	1	ns
Cer(d18:1_18:0)+HCOO	790days	872days	2.94449	0.00323491	0.0291142	*
Cer(d18:1_18:0)+HCOO	834days	872days	2.3094	0.0209213	0.146449	ns
Cer(d18:1_18:1)+HCOO	2-10days	219days	-1.60665	0.108131	0.648783	ns
Cer(d18:1_18:1)+HCOO	2-10days	790days	-0.365148	0.715001	1	ns
Cer(d18:1_18:1)+HCOO	2-10days	834days	0.949386	0.342424	1	ns
Cer(d18:1_18:1)+HCOO	2-10days	872days	2.48301	0.0130278	0.11725	ns
Cer(d18:1_18:1)+HCOO	219days	790days	0.981495	0.326348	1	ns
Cer(d18:1_18:1)+HCOO	219days	834days	2.02073	0.0433081	0.303157	ns
Cer(d18:1_18:1)+HCOO	219days	872days	3.23316	0.00122428	0.0122428	*
Cer(d18:1_18:1)+HCOO	790days	834days	1.03923	0.298698	1	ns
Cer(d18:1_18:1)+HCOO	790days	872days	2.25167	0.0243434	0.194747	ns
Cer(d18:1_18:1)+HCOO	834days	872days	1.21244	0.225346	1	ns
Cer(d18:1_18:2)+HCOO	2-10days	219days	-0.821584	0.411314	1	ns
Cer(d18:1_18:2)+HCOO	2-10days	790days	-0.675524	0.499343	1	ns
Cer(d18:1_18:2)+HCOO	2-10days	834days	-0.675524	0.499343	1	ns
Cer(d18:1_18:2)+HCOO	2-10days	872days	2.31869	0.0204117	0.161337	ns
Cer(d18:1_18:2)+HCOO	219days	790days	0.11547	0.908073	1	ns
Cer(d18:1_18:2)+HCOO	219days	834days	0.11547	0.908073	1	ns
Cer(d18:1_18:2)+HCOO	219days	872days	2.48261	0.0130425	0.130425	ns
Cer(d18:1_18:2)+HCOO	790days	834days	0	1	1	ns
Cer(d18:1_18:2)+HCOO	790days	872days	2.36714	0.0179263	0.161337	ns
Cer(d18:1_18:2)+HCOO	834days	872days	2.36714	0.0179263	0.161337	ns
Cer(d18:1_20:0)+HCOO	2-10days	219days	-2.73861	0.0061699	0.0493592	*
Cer(d18:1_20:0)+HCOO	2-10days	790days	-1.42408	0.154424	0.617695	ns
Cer(d18:1_20:0)+HCOO	2-10days	834days	-2.22741	0.0259202	0.155521	ns
Cer(d18:1_20:0)+HCOO	2-10days	872days	1.7162	0.0861259	0.43063	ns
Cer(d18:1_20:0)+HCOO	219days	790days	1.03923	0.298698	0.896093	ns
Cer(d18:1_20:0)+HCOO	219days	834days	0.404145	0.686106	1	ns
Cer(d18:1_20:0)+HCOO	219days	872days	3.52184	0.000428568	0.00428568	**
Cer(d18:1_20:0)+HCOO	790days	834days	-0.635085	0.525373	1	ns
Cer(d18:1_20:0)+HCOO	790days	872days	2.48261	0.0130425	0.0912976	ns
Cer(d18:1_20:0)+HCOO	834days	872days	3.11769	0.00182274	0.0164046	*
Cer(d18:1_22:0)+HCOO	2-10days	219days	-2.8299	0.00465626	0.0419063	*
Cer(d18:1_22:0)+HCOO	2-10days	790days	-1.07719	0.281396	0.844189	ns
Cer(d18:1_22:0)+HCOO	2-10days	834days	-1.95354	0.0507552	0.304531	ns
Cer(d18:1_22:0)+HCOO	2-10days	872days	1.62491	0.104182	0.520908	ns
Cer(d18:1_22:0)+HCOO	219days	790days	1.38564	0.165857	0.663427	ns
Cer(d18:1_22:0)+HCOO	219days	834days	0.69282	0.488422	0.976845	ns
Cer(d18:1_22:0)+HCOO	219days	872days	3.52184	0.000428568	0.00428568	**
Cer(d18:1_22:0)+HCOO	790days	834days	-0.69282	0.488422	0.976845	ns
Cer(d18:1_22:0)+HCOO	790days	872days	2.1362	0.0326634	0.228644	ns
Cer(d18:1_22:0)+HCOO	834days	872days	2.82902	0.00466913	0.0419063	*
Cer(d18:1_22:0)-H	2-10days	219days	-2.73861	0.0061699	0.0493592	*
Cer(d18:1_22:0)-H	2-10days	790days	-0.839841	0.400997	1	ns
Cer(d18:1_22:0)-H	2-10days	834days	-1.78923	0.0735783	0.375401	ns
Cer(d18:1_22:0)-H	2-10days	872days	1.86226	0.0625669	0.375401	ns
Cer(d18:1_22:0)-H	219days	790days	1.50111	0.133327	0.533308	ns
Cer(d18:1_22:0)-H	219days	834days	0.750555	0.45292	1	ns
Cer(d18:1_22:0)-H	219days	872days	3.63731	0.000275504	0.00275504	**
Cer(d18:1_22:0)-H	790days	834days	-0.750555	0.45292	1	ns
Cer(d18:1_22:0)-H	790days	872days	2.1362	0.0326634	0.228644	ns
Cer(d18:1_22:0)-H	834days	872days	2.88675	0.00389242	0.0350318	*
Cer(d18:1_23:0)+HCOO	2-10days	219days	-2.59255	0.00952664	0.0762131	ns
Cer(d18:1_23:0)+HCOO	2-10days	790days	-0.0365148	0.970872	0.970872	ns
Cer(d18:1_23:0)+HCOO	2-10days	834days	-1.64317	0.100348	0.501741	ns
Cer(d18:1_23:0)+HCOO	2-10days	872days	1.93529	0.0529552	0.317731	ns
Cer(d18:1_23:0)+HCOO	219days	790days	2.02073	0.0433081	0.303157	ns
Cer(d18:1_23:0)+HCOO	219days	834days	0.750555	0.45292	0.905841	ns
Cer(d18:1_23:0)+HCOO	219days	872days	3.57957	0.000344158	0.00344158	**
Cer(d18:1_23:0)+HCOO	790days	834days	-1.27017	0.204024	0.612072	ns
Cer(d18:1_23:0)+HCOO	790days	872days	1.55885	0.119033	0.501741	ns
Cer(d18:1_23:0)+HCOO	834days	872days	2.82902	0.00466913	0.0420222	*
Cer(d18:1_24:0)+HCOO	2-10days	219days	-2.84816	0.00439732	0.0395759	*
Cer(d18:1_24:0)+HCOO	2-10days	790days	-0.876356	0.380836	1	ns
Cer(d18:1_24:0)+HCOO	2-10days	834days	-1.82574	0.0678892	0.475224	ns
Cer(d18:1_24:0)+HCOO	2-10days	872days	1.16847	0.242615	0.970461	ns
Cer(d18:1_24:0)+HCOO	219days	790days	1.55885	0.119033	0.635813	ns
Cer(d18:1_24:0)+HCOO	219days	834days	0.80829	0.418923	1	ns
Cer(d18:1_24:0)+HCOO	219days	872days	3.17543	0.00149616	0.0149616	*
Cer(d18:1_24:0)+HCOO	790days	834days	-0.750555	0.45292	1	ns
Cer(d18:1_24:0)+HCOO	790days	872days	1.61658	0.105969	0.635813	ns
Cer(d18:1_24:0)+HCOO	834days	872days	2.36714	0.0179263	0.143411	ns
Cer(d18:1_24:0)-H	2-10days	219days	-3.03073	0.00243962	0.0243962	*
Cer(d18:1_24:0)-H	2-10days	790days	-0.912871	0.36131	1	ns
Cer(d18:1_24:0)-H	2-10days	834days	-2.08135	0.0374023	0.299218	ns
Cer(d18:1_24:0)-H	2-10days	872days	0.182574	0.855132	1	ns
Cer(d18:1_24:0)-H	219days	790days	1.67432	0.0940686	0.564411	ns
Cer(d18:1_24:0)-H	219days	834days	0.750555	0.45292	1	ns
Cer(d18:1_24:0)-H	219days	872days	2.54034	0.0110744	0.0996699	ns
Cer(d18:1_24:0)-H	790days	834days	-0.92376	0.355611	1	ns
Cer(d18:1_24:0)-H	790days	872days	0.866025	0.386476	1	ns
Cer(d18:1_24:0)-H	834days	872days	1.78979	0.0734883	0.514418	ns
Cer(d18:1_24:1)+HCOO	2-10days	219days	-2.8299	0.00465626	0.0465626	*
Cer(d18:1_24:1)+HCOO	2-10days	790days	-0.56598	0.571407	1	ns
Cer(d18:1_24:1)+HCOO	2-10days	834days	-1.36931	0.170904	1	ns
Cer(d18:1_24:1)+HCOO	2-10days	872days	0.529465	0.596483	1	ns
Cer(d18:1_24:1)+HCOO	219days	790days	1.78979	0.0734883	0.587907	ns
Cer(d18:1_24:1)+HCOO	219days	834days	1.1547	0.248213	1	ns
Cer(d18:1_24:1)+HCOO	219days	872days	2.65581	0.00791179	0.0712061	ns
Cer(d18:1_24:1)+HCOO	790days	834days	-0.635085	0.525373	1	ns
Cer(d18:1_24:1)+HCOO	790days	872days	0.866025	0.386476	1	ns
Cer(d18:1_24:1)+HCOO	834days	872days	1.50111	0.133327	0.933289	ns
Cer(d18:1_24:1)-H	2-10days	219days	-3.04899	0.00229613	0.0229613	*
Cer(d18:1_24:1)-H	2-10days	790days	-1.5884	0.112197	0.560985	ns
Cer(d18:1_24:1)-H	2-10days	834days	-2.0996	0.0357638	0.250346	ns
Cer(d18:1_24:1)-H	2-10days	872days	0.748554	0.454126	1	ns
Cer(d18:1_24:1)-H	219days	790days	1.1547	0.248213	0.992852	ns
Cer(d18:1_24:1)-H	219days	834days	0.750555	0.45292	1	ns
Cer(d18:1_24:1)-H	219days	872days	3.00222	0.00268017	0.0241215	*
Cer(d18:1_24:1)-H	790days	834days	-0.404145	0.686106	1	ns
Cer(d18:1_24:1)-H	790days	872days	1.84752	0.0646717	0.38803	ns
Cer(d18:1_24:1)-H	834days	872days	2.25167	0.0243434	0.194747	ns
Cer(d18:1_24:2)+HCOO	2-10days	219days	-3.01247	0.00259128	0.0233215	*
Cer(d18:1_24:2)+HCOO	2-10days	790days	-1.69794	0.0895191	0.447596	ns
Cer(d18:1_24:2)+HCOO	2-10days	834days	-2.20915	0.0271644	0.162986	ns
Cer(d18:1_24:2)+HCOO	2-10days	872days	1.22325	0.221236	0.884946	ns
Cer(d18:1_24:2)+HCOO	219days	790days	1.03923	0.298698	0.896093	ns
Cer(d18:1_24:2)+HCOO	219days	834days	0.635085	0.525373	1	ns
Cer(d18:1_24:2)+HCOO	219days	872days	3.34863	0.000812117	0.00812117	**
Cer(d18:1_24:2)+HCOO	790days	834days	-0.404145	0.686106	1	ns
Cer(d18:1_24:2)+HCOO	790days	872days	2.3094	0.0209213	0.146449	ns
Cer(d18:1_24:2)+HCOO	834days	872days	2.71355	0.00665673	0.0532538	ns
Cer(d18:1_25:0)+HCOO	2-10days	219days	-2.24566	0.0247256	0.222531	ns
Cer(d18:1_25:0)+HCOO	2-10days	790days	0.0912871	0.927264	1	ns
Cer(d18:1_25:0)+HCOO	2-10days	834days	-1.29628	0.19488	1	ns
Cer(d18:1_25:0)+HCOO	2-10days	872days	0.967643	0.333223	1	ns
Cer(d18:1_25:0)+HCOO	219days	790days	1.84752	0.0646717	0.517374	ns
Cer(d18:1_25:0)+HCOO	219days	834days	0.750555	0.45292	1	ns
Cer(d18:1_25:0)+HCOO	219days	872days	2.54034	0.0110744	0.110744	ns
Cer(d18:1_25:0)+HCOO	790days	834days	-1.09697	0.272656	1	ns
Cer(d18:1_25:0)+HCOO	790days	872days	0.69282	0.488422	1	ns
Cer(d18:1_25:0)+HCOO	834days	872days	1.78979	0.0734883	0.517374	ns
Cer(d18:1_26:0)+HCOO	2-10days	219days	-2.20915	0.0271644	0.271644	ns
Cer(d18:1_26:0)+HCOO	2-10days	790days	0.49295	0.622048	1	ns
Cer(d18:1_26:0)+HCOO	2-10days	834days	0.200832	0.84083	1	ns
Cer(d18:1_26:0)+HCOO	2-10days	872days	0.49295	0.622048	1	ns
Cer(d18:1_26:0)+HCOO	219days	790days	2.1362	0.0326634	0.293971	ns
Cer(d18:1_26:0)+HCOO	219days	834days	1.90526	0.0567468	0.397228	ns
Cer(d18:1_26:0)+HCOO	219days	872days	2.1362	0.0326634	0.293971	ns
Cer(d18:1_26:0)+HCOO	790days	834days	-0.23094	0.817361	1	ns
Cer(d18:1_26:0)+HCOO	790days	872days	0	1	1	ns
Cer(d18:1_26:0)+HCOO	834days	872days	0.23094	0.817361	1	ns
Cer(d18:1_26:2)+HCOO	2-10days	219days	2.00832	0.0446097	0.267658	ns
Cer(d18:1_26:2)+HCOO	2-10days	790days	-2.15438	0.0312107	0.218475	ns
Cer(d18:1_26:2)+HCOO	2-10days	834days	-0.985901	0.324182	1	ns
Cer(d18:1_26:2)+HCOO	2-10days	872days	-1.20499	0.228207	1	ns
Cer(d18:1_26:2)+HCOO	219days	790days	-3.2909	0.000998686	0.00998686	**
Cer(d18:1_26:2)+HCOO	219days	834days	-2.36714	0.0179263	0.143411	ns
Cer(d18:1_26:2)+HCOO	219days	872days	-2.54034	0.0110744	0.0996699	ns
Cer(d18:1_26:2)+HCOO	790days	834days	0.92376	0.355611	1	ns
Cer(d18:1_26:2)+HCOO	790days	872days	0.750555	0.45292	1	ns
Cer(d18:1_26:2)+HCOO	834days	872days	-0.173205	0.86249	1	ns
Cer(d18:2_16:0)+HCOO	2-10days	219days	-2.84816	0.00439732	0.0395759	*
Cer(d18:2_16:0)+HCOO	2-10days	790days	-1.60665	0.108131	0.477909	ns
Cer(d18:2_16:0)+HCOO	2-10days	834days	-1.67968	0.0930191	0.477909	ns
Cer(d18:2_16:0)+HCOO	2-10days	872days	1.75271	0.0796514	0.477909	ns
Cer(d18:2_16:0)+HCOO	219days	790days	0.981495	0.326348	0.979045	ns
Cer(d18:2_16:0)+HCOO	219days	834days	0.92376	0.355611	0.979045	ns
Cer(d18:2_16:0)+HCOO	219days	872days	3.63731	0.000275504	0.00275504	**
Cer(d18:2_16:0)+HCOO	790days	834days	-0.057735	0.95396	0.979045	ns
Cer(d18:2_16:0)+HCOO	790days	872days	2.65581	0.00791179	0.0553825	ns
Cer(d18:2_16:0)+HCOO	834days	872days	2.71355	0.00665673	0.0532538	ns
Cer(d18:2_18:0)-H	2-10days	219days	2.34224	0.0191684	0.153347	ns
Cer(d18:2_18:0)-H	2-10days	790days	3.11019	0.00186968	0.0168271	*
Cer(d18:2_18:0)-H	2-10days	834days	1.80468	0.0711252	0.497877	ns
Cer(d18:2_18:0)-H	2-10days	872days	3.80134	0.000143915	0.00143915	**
Cer(d18:2_18:0)-H	219days	790days	0.607116	0.543774	1	ns
Cer(d18:2_18:0)-H	219days	834days	-0.424981	0.67085	1	ns
Cer(d18:2_18:0)-H	219days	872days	1.15352	0.248697	1	ns
Cer(d18:2_18:0)-H	790days	834days	-1.0321	0.302027	1	ns
Cer(d18:2_18:0)-H	790days	872days	0.546404	0.584788	1	ns
Cer(d18:2_18:0)-H	834days	872days	1.5785	0.11445	0.686703	ns
Cer(d18:2_18:2)+HCOO	2-10days	219days	2.66167	0.00777539	0.0699785	ns
Cer(d18:2_18:2)+HCOO	2-10days	790days	0.147871	0.882445	1	ns
Cer(d18:2_18:2)+HCOO	2-10days	834days	1.84838	0.064547	0.387282	ns
Cer(d18:2_18:2)+HCOO	2-10days	872days	3.32709	0.000877585	0.00877585	**
Cer(d18:2_18:2)+HCOO	219days	790days	-1.98733	0.0468854	0.328198	ns
Cer(d18:2_18:2)+HCOO	219days	834days	-0.642961	0.520249	1	ns
Cer(d18:2_18:2)+HCOO	219days	872days	0.526059	0.598847	1	ns
Cer(d18:2_18:2)+HCOO	790days	834days	1.34437	0.178828	0.894139	ns
Cer(d18:2_18:2)+HCOO	790days	872days	2.51339	0.0119576	0.095661	ns
Cer(d18:2_18:2)+HCOO	834days	872days	1.16902	0.242396	0.969583	ns
Cer(d18:2_20:0)+HCOO	2-10days	219days	-1.29628	0.19488	0.779521	ns
Cer(d18:2_20:0)+HCOO	2-10days	790days	-1.73445	0.0828374	0.414187	ns
Cer(d18:2_20:0)+HCOO	2-10days	834days	-1.95354	0.0507552	0.355286	ns
Cer(d18:2_20:0)+HCOO	2-10days	872days	1.91703	0.0552343	0.355286	ns
Cer(d18:2_20:0)+HCOO	219days	790days	-0.34641	0.729034	1	ns
Cer(d18:2_20:0)+HCOO	219days	834days	-0.519615	0.603332	1	ns
Cer(d18:2_20:0)+HCOO	219days	872days	2.54034	0.0110744	0.0885955	ns
Cer(d18:2_20:0)+HCOO	790days	834days	-0.173205	0.86249	1	ns
Cer(d18:2_20:0)+HCOO	790days	872days	2.88675	0.00389242	0.0350318	*
Cer(d18:2_20:0)+HCOO	834days	872days	3.05996	0.00221369	0.0221369	*
Cer(d18:2_21:0)+HCOO	2-10days	219days	-2.02657	0.0427061	0.256236	ns
Cer(d18:2_21:0)+HCOO	2-10days	790days	-1.51537	0.12968	0.518719	ns
Cer(d18:2_21:0)+HCOO	2-10days	834days	-2.46475	0.0137108	0.0959758	ns
Cer(d18:2_21:0)+HCOO	2-10days	872days	1.77097	0.0765658	0.382829	ns
Cer(d18:2_21:0)+HCOO	219days	790days	0.404145	0.686106	1	ns
Cer(d18:2_21:0)+HCOO	219days	834days	-0.34641	0.729034	1	ns
Cer(d18:2_21:0)+HCOO	219days	872days	3.00222	0.00268017	0.0241215	*
Cer(d18:2_21:0)+HCOO	790days	834days	-0.750555	0.45292	1	ns
Cer(d18:2_21:0)+HCOO	790days	872days	2.59808	0.00937477	0.0749981	ns
Cer(d18:2_21:0)+HCOO	834days	872days	3.34863	0.000812117	0.00812117	**
Cer(d18:2_22:0)+HCOO	2-10days	219days	-2.93944	0.00328801	0.0263041	*
Cer(d18:2_22:0)+HCOO	2-10days	790days	-1.69794	0.0895191	0.447596	ns
Cer(d18:2_22:0)+HCOO	2-10days	834days	-2.13612	0.0326698	0.196019	ns
Cer(d18:2_22:0)+HCOO	2-10days	872days	1.66143	0.0966281	0.447596	ns
Cer(d18:2_22:0)+HCOO	219days	790days	0.981495	0.326348	0.979045	ns
Cer(d18:2_22:0)+HCOO	219days	834days	0.635085	0.525373	1	ns
Cer(d18:2_22:0)+HCOO	219days	872days	3.63731	0.000275504	0.00275504	**
Cer(d18:2_22:0)+HCOO	790days	834days	-0.34641	0.729034	1	ns
Cer(d18:2_22:0)+HCOO	790days	872days	2.65581	0.00791179	0.0553825	ns
Cer(d18:2_22:0)+HCOO	834days	872days	3.00222	0.00268017	0.0241215	*
Cer(d18:2_23:0)+HCOO	2-10days	219days	-2.53778	0.0111558	0.0892462	ns
Cer(d18:2_23:0)+HCOO	2-10days	790days	-1.07719	0.281396	0.992852	ns
Cer(d18:2_23:0)+HCOO	2-10days	834days	-2.39172	0.0167695	0.117387	ns
Cer(d18:2_23:0)+HCOO	2-10days	872days	1.77097	0.0765658	0.382829	ns
Cer(d18:2_23:0)+HCOO	219days	790days	1.1547	0.248213	0.992852	ns
Cer(d18:2_23:0)+HCOO	219days	834days	0.11547	0.908073	0.992852	ns
Cer(d18:2_23:0)+HCOO	219days	872days	3.40637	0.000658337	0.00658337	**
Cer(d18:2_23:0)+HCOO	790days	834days	-1.03923	0.298698	0.992852	ns
Cer(d18:2_23:0)+HCOO	790days	872days	2.25167	0.0243434	0.14606	ns
Cer(d18:2_23:0)+HCOO	834days	872days	3.2909	0.000998686	0.00898818	**
Cer(d18:2_24:2)+HCOO	2-10days	219days	-3.17679	0.00148914	0.0148914	*
Cer(d18:2_24:2)+HCOO	2-10days	790days	-2.30043	0.0214236	0.171389	ns
Cer(d18:2_24:2)+HCOO	2-10days	834days	-2.08135	0.0374023	0.224414	ns
Cer(d18:2_24:2)+HCOO	2-10days	872days	0.547723	0.583882	1	ns
Cer(d18:2_24:2)+HCOO	219days	790days	0.69282	0.488422	1	ns
Cer(d18:2_24:2)+HCOO	219days	834days	0.866025	0.386476	1	ns
Cer(d18:2_24:2)+HCOO	219days	872days	2.94449	0.00323491	0.0291142	*
Cer(d18:2_24:2)+HCOO	790days	834days	0.173205	0.86249	1	ns
Cer(d18:2_24:2)+HCOO	790days	872days	2.25167	0.0243434	0.171389	ns
Cer(d18:2_24:2)+HCOO	834days	872days	2.07846	0.0376669	0.224414	ns
Cer(d19:1_24:0)+HCOO	2-10days	219days	-2.37346	0.0176221	0.140977	ns
Cer(d19:1_24:0)+HCOO	2-10days	790days	1.42408	0.154424	0.772119	ns
Cer(d19:1_24:0)+HCOO	2-10days	834days	-0.912871	0.36131	0.80497	ns
Cer(d19:1_24:0)+HCOO	2-10days	872days	1.27802	0.201243	0.80497	ns
Cer(d19:1_24:0)+HCOO	219days	790days	3.00222	0.00268017	0.0268017	*
Cer(d19:1_24:0)+HCOO	219days	834days	1.1547	0.248213	0.80497	ns
Cer(d19:1_24:0)+HCOO	219days	872days	2.88675	0.00389242	0.0350318	*
Cer(d19:1_24:0)+HCOO	790days	834days	-1.84752	0.0646717	0.452702	ns
Cer(d19:1_24:0)+HCOO	790days	872days	-0.11547	0.908073	0.908073	ns
Cer(d19:1_24:0)+HCOO	834days	872days	1.73205	0.0832645	0.499587	ns
Cer(d20:0_21:0)+HCOO	2-10days	219days	-2.44649	0.0144253	0.117383	ns
Cer(d20:0_21:0)+HCOO	2-10days	790days	-0.620752	0.534763	1	ns
Cer(d20:0_21:0)+HCOO	2-10days	834days	-1.49711	0.134365	0.671825	ns
Cer(d20:0_21:0)+HCOO	2-10days	872days	1.64317	0.100348	0.602089	ns
Cer(d20:0_21:0)+HCOO	219days	790days	1.44338	0.148915	0.671825	ns
Cer(d20:0_21:0)+HCOO	219days	834days	0.750555	0.45292	1	ns
Cer(d20:0_21:0)+HCOO	219days	872days	3.23316	0.00122428	0.0122428	*
Cer(d20:0_21:0)+HCOO	790days	834days	-0.69282	0.488422	1	ns
Cer(d20:0_21:0)+HCOO	790days	872days	1.78979	0.0734883	0.514418	ns
Cer(d20:0_21:0)+HCOO	834days	872days	2.48261	0.0130425	0.117383	ns
Cer(d20:0_25:0)+HCOO	2-10days	219days	1.93529	0.0529552	0.264776	ns
Cer(d20:0_25:0)+HCOO	2-10days	790days	-0.912871	0.36131	1	ns
Cer(d20:0_25:0)+HCOO	2-10days	834days	2.59255	0.00952664	0.0762131	ns
Cer(d20:0_25:0)+HCOO	2-10days	872days	-1.27802	0.201243	0.80497	ns
Cer(d20:0_25:0)+HCOO	219days	790days	-2.25167	0.0243434	0.14606	ns
Cer(d20:0_25:0)+HCOO	219days	834days	0.519615	0.603332	1	ns
Cer(d20:0_25:0)+HCOO	219days	872days	-2.54034	0.0110744	0.0775211	ns
Cer(d20:0_25:0)+HCOO	790days	834days	2.77128	0.00558362	0.0502526	ns
Cer(d20:0_25:0)+HCOO	790days	872days	-0.288675	0.77283	1	ns
Cer(d20:0_25:0)+HCOO	834days	872days	-3.05996	0.00221369	0.0221369	*
Cer(d24:2_18:1)+HCOO	2-10days	219days	-0.511208	0.609206	1	ns
Cer(d24:2_18:1)+HCOO	2-10days	790days	-0.146059	0.883875	1	ns
Cer(d24:2_18:1)+HCOO	2-10days	834days	1.75271	0.0796514	0.734883	ns
Cer(d24:2_18:1)+HCOO	2-10days	872days	-0.219089	0.826581	1	ns
Cer(d24:2_18:1)+HCOO	219days	790days	0.288675	0.77283	1	ns
Cer(d24:2_18:1)+HCOO	219days	834days	1.78979	0.0734883	0.734883	ns
Cer(d24:2_18:1)+HCOO	219days	872days	0.23094	0.817361	1	ns
Cer(d24:2_18:1)+HCOO	790days	834days	1.50111	0.133327	0.952263	ns
Cer(d24:2_18:1)+HCOO	790days	872days	-0.057735	0.95396	1	ns
Cer(d24:2_18:1)+HCOO	834days	872days	-1.55885	0.119033	0.952263	ns
Cer(m17:1_25:0)+HCOO	2-10days	219days	-2.42824	0.0151724	0.136552	ns
Cer(m17:1_25:0)+HCOO	2-10days	790days	-2.35521	0.0185124	0.148099	ns
Cer(m17:1_25:0)+HCOO	2-10days	834days	-3.37762	0.000731154	0.00731154	**
Cer(m17:1_25:0)+HCOO	2-10days	872days	-0.456435	0.648077	1	ns
Cer(m17:1_25:0)+HCOO	219days	790days	0.057735	0.95396	1	ns
Cer(m17:1_25:0)+HCOO	219days	834days	-0.750555	0.45292	1	ns
Cer(m17:1_25:0)+HCOO	219days	872days	1.55885	0.119033	0.714197	ns
Cer(m17:1_25:0)+HCOO	790days	834days	-0.80829	0.418923	1	ns
Cer(m17:1_25:0)+HCOO	790days	872days	1.50111	0.133327	0.714197	ns
Cer(m17:1_25:0)+HCOO	834days	872days	2.3094	0.0209213	0.148099	ns
Cer(t16:1_23:0)+HCOO	2-10days	219days	2.99438	0.00275003	0.0247503	*
Cer(t16:1_23:0)+HCOO	2-10days	790days	1.66354	0.0962035	0.673425	ns
Cer(t16:1_23:0)+HCOO	2-10days	834days	3.6598	0.000252415	0.00252415	**
Cer(t16:1_23:0)+HCOO	2-10days	872days	2.32896	0.0198611	0.158889	ns
Cer(t16:1_23:0)+HCOO	219days	790days	-1.05212	0.292746	1	ns
Cer(t16:1_23:0)+HCOO	219days	834days	0.526059	0.598847	1	ns
Cer(t16:1_23:0)+HCOO	219days	872days	-0.526059	0.598847	1	ns
Cer(t16:1_23:0)+HCOO	790days	834days	1.57818	0.114525	0.68715	ns
Cer(t16:1_23:0)+HCOO	790days	872days	0.526059	0.598847	1	ns
Cer(t16:1_23:0)+HCOO	834days	872days	-1.05212	0.292746	1	ns
Cer(t16:1_24:1)+HCOO	2-10days	219days	-0.785069	0.432413	1	ns
Cer(t16:1_24:1)+HCOO	2-10days	790days	-1.5884	0.112197	0.673182	ns
Cer(t16:1_24:1)+HCOO	2-10days	834days	-1.5884	0.112197	0.673182	ns
Cer(t16:1_24:1)+HCOO	2-10days	872days	2.06309	0.0391042	0.27373	ns
Cer(t16:1_24:1)+HCOO	219days	790days	-0.635085	0.525373	1	ns
Cer(t16:1_24:1)+HCOO	219days	834days	-0.635085	0.525373	1	ns
Cer(t16:1_24:1)+HCOO	219days	872days	2.25167	0.0243434	0.194747	ns
Cer(t16:1_24:1)+HCOO	790days	834days	0	1	1	ns
Cer(t16:1_24:1)+HCOO	790days	872days	2.88675	0.00389242	0.0389242	*
Cer(t16:1_24:1)+HCOO	834days	872days	2.88675	0.00389242	0.0389242	*
Cer(t16:1_26:2)+HCOO	2-10days	219days	-2.17263	0.029808	0.238464	ns
Cer(t16:1_26:2)+HCOO	2-10days	790days	0.310376	0.756275	1	ns
Cer(t16:1_26:2)+HCOO	2-10days	834days	0.456435	0.648077	1	ns
Cer(t16:1_26:2)+HCOO	2-10days	872days	2.42824	0.0151724	0.136552	ns
Cer(t16:1_26:2)+HCOO	219days	790days	1.96299	0.0496472	0.297883	ns
Cer(t16:1_26:2)+HCOO	219days	834days	2.07846	0.0376669	0.263668	ns
Cer(t16:1_26:2)+HCOO	219days	872days	3.63731	0.000275504	0.00275504	**
Cer(t16:1_26:2)+HCOO	790days	834days	0.11547	0.908073	1	ns
Cer(t16:1_26:2)+HCOO	790days	872days	1.67432	0.0940686	0.470343	ns
Cer(t16:1_26:2)+HCOO	834days	872days	1.55885	0.119033	0.476132	ns
Cer(t17:0_17:0+O)+HCOO	2-10days	219days	3.03073	0.00243962	0.0219566	*
Cer(t17:0_17:0+O)+HCOO	2-10days	790days	2.30043	0.0214236	0.171389	ns
Cer(t17:0_17:0+O)+HCOO	2-10days	834days	3.54194	0.000397197	0.00397197	**
Cer(t17:0_17:0+O)+HCOO	2-10days	872days	1.64317	0.100348	0.702438	ns
Cer(t17:0_17:0+O)+HCOO	219days	790days	-0.57735	0.563703	1	ns
Cer(t17:0_17:0+O)+HCOO	219days	834days	0.404145	0.686106	1	ns
Cer(t17:0_17:0+O)+HCOO	219days	872days	-1.09697	0.272656	1	ns
Cer(t17:0_17:0+O)+HCOO	790days	834days	0.981495	0.326348	1	ns
Cer(t17:0_17:0+O)+HCOO	790days	872days	-0.519615	0.603332	1	ns
Cer(t17:0_17:0+O)+HCOO	834days	872days	-1.50111	0.133327	0.799962	ns
Cer(t17:0_19:1)+HCOO	2-10days	219days	3.27483	0.00105724	0.00951519	**
Cer(t17:0_19:1)+HCOO	2-10days	790days	1.65581	0.0977594	0.684316	ns
Cer(t17:0_19:1)+HCOO	2-10days	834days	3.34842	0.000812723	0.00812723	**
Cer(t17:0_19:1)+HCOO	2-10days	872days	2.31814	0.0204417	0.163534	ns
Cer(t17:0_19:1)+HCOO	219days	790days	-1.27995	0.200564	1	ns
Cer(t17:0_19:1)+HCOO	219days	834days	0.0581794	0.953606	1	ns
Cer(t17:0_19:1)+HCOO	219days	872days	-0.756332	0.44945	1	ns
Cer(t17:0_19:1)+HCOO	790days	834days	1.33813	0.180855	1	ns
Cer(t17:0_19:1)+HCOO	790days	872days	0.523615	0.600547	1	ns
Cer(t17:0_19:1)+HCOO	834days	872days	-0.814512	0.415352	1	ns
Cer(t17:0_24:0+O)+HCOO	2-10days	219days	3.30459	0.000951145	0.00951145	**
Cer(t17:0_24:0+O)+HCOO	2-10days	790days	2.06309	0.0391042	0.27373	ns
Cer(t17:0_24:0+O)+HCOO	2-10days	834days	2.5743	0.0100444	0.0903999	ns
Cer(t17:0_24:0+O)+HCOO	2-10days	872days	0.0912871	0.927264	1	ns
Cer(t17:0_24:0+O)+HCOO	219days	790days	-0.981495	0.326348	1	ns
Cer(t17:0_24:0+O)+HCOO	219days	834days	-0.57735	0.563703	1	ns
Cer(t17:0_24:0+O)+HCOO	219days	872days	-2.54034	0.0110744	0.0903999	ns
Cer(t17:0_24:0+O)+HCOO	790days	834days	0.404145	0.686106	1	ns
Cer(t17:0_24:0+O)+HCOO	790days	872days	-1.55885	0.119033	0.595164	ns
Cer(t17:0_24:0+O)+HCOO	834days	872days	-1.96299	0.0496472	0.297883	ns
Cer(t17:0_25:0+O)+HCOO	2-10days	219days	3.61497	0.000300384	0.00300384	**
Cer(t17:0_25:0+O)+HCOO	2-10days	790days	2.37346	0.0176221	0.140977	ns
Cer(t17:0_25:0+O)+HCOO	2-10days	834days	2.88467	0.00391821	0.0352639	*
Cer(t17:0_25:0+O)+HCOO	2-10days	872days	1.64317	0.100348	0.702438	ns
Cer(t17:0_25:0+O)+HCOO	219days	790days	-0.981495	0.326348	1	ns
Cer(t17:0_25:0+O)+HCOO	219days	834days	-0.57735	0.563703	1	ns
Cer(t17:0_25:0+O)+HCOO	219days	872days	-1.55885	0.119033	0.714197	ns
Cer(t17:0_25:0+O)+HCOO	790days	834days	0.404145	0.686106	1	ns
Cer(t17:0_25:0+O)+HCOO	790days	872days	-0.57735	0.563703	1	ns
Cer(t17:0_25:0+O)+HCOO	834days	872days	-0.981495	0.326348	1	ns
Cer(t17:1_15:0)+HCOO	2-10days	219days	3.37407	0.000740664	0.00740664	**
Cer(t17:1_15:0)+HCOO	2-10days	790days	0.660144	0.509162	1	ns
Cer(t17:1_15:0)+HCOO	2-10days	834days	1.90708	0.0565101	0.39557	ns
Cer(t17:1_15:0)+HCOO	2-10days	872days	2.56722	0.0102516	0.0922645	ns
Cer(t17:1_15:0)+HCOO	219days	790days	-2.14554	0.0319093	0.255274	ns
Cer(t17:1_15:0)+HCOO	219days	834days	-1.15975	0.246149	1	ns
Cer(t17:1_15:0)+HCOO	219days	872days	-0.637865	0.523562	1	ns
Cer(t17:1_15:0)+HCOO	790days	834days	0.985791	0.324236	1	ns
Cer(t17:1_15:0)+HCOO	790days	872days	1.50768	0.131636	0.789818	ns
Cer(t17:1_15:0)+HCOO	834days	872days	0.521889	0.601747	1	ns
Cer(t17:1_18:1)+HCOO	2-10days	219days	3.68285	0.000230644	0.00230644	**
Cer(t17:1_18:1)+HCOO	2-10days	790days	2.34363	0.0190971	0.152777	ns
Cer(t17:1_18:1)+HCOO	2-10days	834days	3.01324	0.00258476	0.0232629	*
Cer(t17:1_18:1)+HCOO	2-10days	872days	1.67402	0.0941265	0.658885	ns
Cer(t17:1_18:1)+HCOO	219days	790days	-1.05874	0.289716	1	ns
Cer(t17:1_18:1)+HCOO	219days	834days	-0.529372	0.596547	1	ns
Cer(t17:1_18:1)+HCOO	219days	872days	-1.58812	0.11226	0.673561	ns
Cer(t17:1_18:1)+HCOO	790days	834days	0.529372	0.596547	1	ns
Cer(t17:1_18:1)+HCOO	790days	872days	-0.529372	0.596547	1	ns
Cer(t17:1_18:1)+HCOO	834days	872days	-1.05874	0.289716	1	ns
Cer(t17:1_23:0+O)+HCOO	2-10days	219days	3.50619	0.000454576	0.00454576	**
Cer(t17:1_23:0+O)+HCOO	2-10days	790days	2.4105	0.0159305	0.127444	ns
Cer(t17:1_23:0+O)+HCOO	2-10days	834days	2.62964	0.00854753	0.0769278	ns
Cer(t17:1_23:0+O)+HCOO	2-10days	872days	1.09568	0.273217	1	ns
Cer(t17:1_23:0+O)+HCOO	219days	790days	-0.866214	0.386373	1	ns
Cer(t17:1_23:0+O)+HCOO	219days	834days	-0.692971	0.488328	1	ns
Cer(t17:1_23:0+O)+HCOO	219days	872days	-1.90567	0.056693	0.396851	ns
Cer(t17:1_23:0+O)+HCOO	790days	834days	0.173243	0.862461	1	ns
Cer(t17:1_23:0+O)+HCOO	790days	872days	-1.03946	0.298592	1	ns
Cer(t17:1_23:0+O)+HCOO	834days	872days	-1.2127	0.225245	1	ns
Cer(t17:1_24:1)+HCOO	2-10days	219days	2.85064	0.00436317	0.0436317	*
Cer(t17:1_24:1)+HCOO	2-10days	790days	0.21928	0.826432	1	ns
Cer(t17:1_24:1)+HCOO	2-10days	834days	-0.146187	0.883774	1	ns
Cer(t17:1_24:1)+HCOO	2-10days	872days	1.46187	0.143778	1	ns
Cer(t17:1_24:1)+HCOO	219days	790days	-2.08027	0.0375007	0.300006	ns
Cer(t17:1_24:1)+HCOO	219days	834days	-2.3692	0.0178267	0.160441	ns
Cer(t17:1_24:1)+HCOO	219days	872days	-1.09792	0.272239	1	ns
Cer(t17:1_24:1)+HCOO	790days	834days	-0.288926	0.772638	1	ns
Cer(t17:1_24:1)+HCOO	790days	872days	0.98235	0.325927	1	ns
Cer(t17:1_24:1)+HCOO	834days	872days	1.27128	0.20363	1	ns
Cer(t17:1_25:0+O)+HCOO	2-10days	219days	3.61497	0.000300384	0.00300384	**
Cer(t17:1_25:0+O)+HCOO	2-10days	790days	2.37346	0.0176221	0.140977	ns
Cer(t17:1_25:0+O)+HCOO	2-10days	834days	2.88467	0.00391821	0.0352639	*
Cer(t17:1_25:0+O)+HCOO	2-10days	872days	1.64317	0.100348	0.702438	ns
Cer(t17:1_25:0+O)+HCOO	219days	790days	-0.981495	0.326348	1	ns
Cer(t17:1_25:0+O)+HCOO	219days	834days	-0.57735	0.563703	1	ns
Cer(t17:1_25:0+O)+HCOO	219days	872days	-1.55885	0.119033	0.714197	ns
Cer(t17:1_25:0+O)+HCOO	790days	834days	0.404145	0.686106	1	ns
Cer(t17:1_25:0+O)+HCOO	790days	872days	-0.57735	0.563703	1	ns
Cer(t17:1_25:0+O)+HCOO	834days	872days	-0.981495	0.326348	1	ns
Cer(t18:0_16:0)+HCOO	2-10days	219days	3.35937	0.000781218	0.00781218	**
Cer(t18:0_16:0)+HCOO	2-10days	790days	1.16847	0.242615	1	ns
Cer(t18:0_16:0)+HCOO	2-10days	834days	2.7021	0.00689035	0.0620131	ns
Cer(t18:0_16:0)+HCOO	2-10days	872days	1.2415	0.214419	1	ns
Cer(t18:0_16:0)+HCOO	219days	790days	-1.73205	0.0832645	0.666116	ns
Cer(t18:0_16:0)+HCOO	219days	834days	-0.519615	0.603332	1	ns
Cer(t18:0_16:0)+HCOO	219days	872days	-1.67432	0.0940686	0.666116	ns
Cer(t18:0_16:0)+HCOO	790days	834days	1.21244	0.225346	1	ns
Cer(t18:0_16:0)+HCOO	790days	872days	0.057735	0.95396	1	ns
Cer(t18:0_16:0)+HCOO	834days	872days	-1.1547	0.248213	1	ns
Cer(t18:0_18:0+O)+HCOO	2-10days	219days	2.93447	0.00334116	0.0334116	*
Cer(t18:0_18:0+O)+HCOO	2-10days	790days	1.90419	0.0568859	0.341315	ns
Cer(t18:0_18:0+O)+HCOO	2-10days	834days	2.86088	0.00422467	0.0380221	*
Cer(t18:0_18:0+O)+HCOO	2-10days	872days	-0.413954	0.678908	1	ns
Cer(t18:0_18:0+O)+HCOO	219days	790days	-0.814512	0.415352	1	ns
Cer(t18:0_18:0+O)+HCOO	219days	834days	-0.0581794	0.953606	1	ns
Cer(t18:0_18:0+O)+HCOO	219days	872days	-2.64716	0.00811704	0.0649363	ns
Cer(t18:0_18:0+O)+HCOO	790days	834days	0.756332	0.44945	1	ns
Cer(t18:0_18:0+O)+HCOO	790days	872days	-1.83265	0.0668545	0.341315	ns
Cer(t18:0_18:0+O)+HCOO	834days	872days	-2.58898	0.00962598	0.0673819	ns
Cer(t18:0_18:1)+HCOO	2-10days	219days	3.12202	0.00179616	0.0179616	*
Cer(t18:0_18:1)+HCOO	2-10days	790days	-0.0182574	0.985433	1	ns
Cer(t18:0_18:1)+HCOO	2-10days	834days	2.46475	0.0137108	0.117383	ns
Cer(t18:0_18:1)+HCOO	2-10days	872days	1.00416	0.315302	1	ns
Cer(t18:0_18:1)+HCOO	219days	790days	-2.48261	0.0130425	0.117383	ns
Cer(t18:0_18:1)+HCOO	219days	834days	-0.519615	0.603332	1	ns
Cer(t18:0_18:1)+HCOO	219days	872days	-1.67432	0.0940686	0.564411	ns
Cer(t18:0_18:1)+HCOO	790days	834days	1.96299	0.0496472	0.347531	ns
Cer(t18:0_18:1)+HCOO	790days	872days	0.80829	0.418923	1	ns
Cer(t18:0_18:1)+HCOO	834days	872days	-1.1547	0.248213	1	ns
Cer(t18:0_20:0)+HCOO	2-10days	219days	2.73861	0.0061699	0.0555291	ns
Cer(t18:0_20:0)+HCOO	2-10days	790days	1.93529	0.0529552	0.317731	ns
Cer(t18:0_20:0)+HCOO	2-10days	834days	3.10376	0.00191078	0.0191078	*
Cer(t18:0_20:0)+HCOO	2-10days	872days	-0.182574	0.855132	1	ns
Cer(t18:0_20:0)+HCOO	219days	790days	-0.635085	0.525373	1	ns
Cer(t18:0_20:0)+HCOO	219days	834days	0.288675	0.77283	1	ns
Cer(t18:0_20:0)+HCOO	219days	872days	-2.3094	0.0209213	0.146449	ns
Cer(t18:0_20:0)+HCOO	790days	834days	0.92376	0.355611	1	ns
Cer(t18:0_20:0)+HCOO	790days	872days	-1.67432	0.0940686	0.470343	ns
Cer(t18:0_20:0)+HCOO	834days	872days	-2.59808	0.00937477	0.0749981	ns
Cer(t18:0_20:0+O)+HCOO	2-10days	219days	2.59255	0.00952664	0.0762131	ns
Cer(t18:0_20:0+O)+HCOO	2-10days	790days	2.00832	0.0446097	0.267658	ns
Cer(t18:0_20:0+O)+HCOO	2-10days	834days	3.17679	0.00148914	0.0148914	*
Cer(t18:0_20:0+O)+HCOO	2-10days	872days	-0.182574	0.855132	1	ns
Cer(t18:0_20:0+O)+HCOO	219days	790days	-0.46188	0.644167	1	ns
Cer(t18:0_20:0+O)+HCOO	219days	834days	0.46188	0.644167	1	ns
Cer(t18:0_20:0+O)+HCOO	219days	872days	-2.19393	0.0282404	0.197683	ns
Cer(t18:0_20:0+O)+HCOO	790days	834days	0.92376	0.355611	1	ns
Cer(t18:0_20:0+O)+HCOO	790days	872days	-1.73205	0.0832645	0.416323	ns
Cer(t18:0_20:0+O)+HCOO	834days	872days	-2.65581	0.00791179	0.0712061	ns
Cer(t18:0_23:0)+HCOO	2-10days	219days	2.66558	0.00768549	0.0614839	ns
Cer(t18:0_23:0)+HCOO	2-10days	790days	1.49711	0.134365	0.671825	ns
Cer(t18:0_23:0)+HCOO	2-10days	834days	2.59255	0.00952664	0.0666865	ns
Cer(t18:0_23:0)+HCOO	2-10days	872days	-1.49711	0.134365	0.671825	ns
Cer(t18:0_23:0)+HCOO	219days	790days	-0.92376	0.355611	1	ns
Cer(t18:0_23:0)+HCOO	219days	834days	-0.057735	0.95396	1	ns
Cer(t18:0_23:0)+HCOO	219days	872days	-3.2909	0.000998686	0.00998686	**
Cer(t18:0_23:0)+HCOO	790days	834days	0.866025	0.386476	1	ns
Cer(t18:0_23:0)+HCOO	790days	872days	-2.36714	0.0179263	0.107558	ns
Cer(t18:0_23:0)+HCOO	834days	872days	-3.23316	0.00122428	0.0110185	*
Cer(t18:0_24:0)+HCOO	2-10days	219days	3.06725	0.00216041	0.0194437	*
Cer(t18:0_24:0)+HCOO	2-10days	790days	2.26392	0.023579	0.188632	ns
Cer(t18:0_24:0)+HCOO	2-10days	834days	3.43239	0.000598276	0.00598276	**
Cer(t18:0_24:0)+HCOO	2-10days	872days	1.46059	0.144127	0.864762	ns
Cer(t18:0_24:0)+HCOO	219days	790days	-0.635085	0.525373	1	ns
Cer(t18:0_24:0)+HCOO	219days	834days	0.288675	0.77283	1	ns
Cer(t18:0_24:0)+HCOO	219days	872days	-1.27017	0.204024	1	ns
Cer(t18:0_24:0)+HCOO	790days	834days	0.92376	0.355611	1	ns
Cer(t18:0_24:0)+HCOO	790days	872days	-0.635085	0.525373	1	ns
Cer(t18:0_24:0)+HCOO	834days	872days	-1.55885	0.119033	0.83323	ns
Cer(t18:0_24:2)+HCOO	2-10days	219days	-1.9718	0.0486323	0.291794	ns
Cer(t18:0_24:2)+HCOO	2-10days	790days	1.9718	0.0486323	0.291794	ns
Cer(t18:0_24:2)+HCOO	2-10days	834days	0	1	1	ns
Cer(t18:0_24:2)+HCOO	2-10days	872days	2.62907	0.00856192	0.0684953	ns
Cer(t18:0_24:2)+HCOO	219days	790days	3.11769	0.00182274	0.0164046	*
Cer(t18:0_24:2)+HCOO	219days	834days	1.55885	0.119033	0.476132	ns
Cer(t18:0_24:2)+HCOO	219days	872days	3.63731	0.000275504	0.00275504	**
Cer(t18:0_24:2)+HCOO	790days	834days	-1.55885	0.119033	0.476132	ns
Cer(t18:0_24:2)+HCOO	790days	872days	0.519615	0.603332	1	ns
Cer(t18:0_24:2)+HCOO	834days	872days	2.07846	0.0376669	0.263668	ns
Cer(t18:0_25:0)+HCOO	2-10days	219days	2.13612	0.0326698	0.228689	ns
Cer(t18:0_25:0)+HCOO	2-10days	790days	0.821584	0.411314	0.896093	ns
Cer(t18:0_25:0)+HCOO	2-10days	834days	2.79339	0.00521596	0.0417277	*
Cer(t18:0_25:0)+HCOO	2-10days	872days	-1.80748	0.0706868	0.353434	ns
Cer(t18:0_25:0)+HCOO	219days	790days	-1.03923	0.298698	0.896093	ns
Cer(t18:0_25:0)+HCOO	219days	834days	0.519615	0.603332	0.896093	ns
Cer(t18:0_25:0)+HCOO	219days	872days	-3.11769	0.00182274	0.0164046	*
Cer(t18:0_25:0)+HCOO	790days	834days	1.55885	0.119033	0.476132	ns
Cer(t18:0_25:0)+HCOO	790days	872days	-2.07846	0.0376669	0.228689	ns
Cer(t18:0_25:0)+HCOO	834days	872days	-3.63731	0.000275504	0.00275504	**
Cer(t18:0_25:0+O)+HCOO	2-10days	219days	2.8299	0.00465626	0.0419063	*
Cer(t18:0_25:0+O)+HCOO	2-10days	790days	1.80748	0.0706868	0.353434	ns
Cer(t18:0_25:0+O)+HCOO	2-10days	834days	2.75687	0.00583575	0.0419063	*
Cer(t18:0_25:0+O)+HCOO	2-10days	872days	-0.821584	0.411314	1	ns
Cer(t18:0_25:0+O)+HCOO	219days	790days	-0.80829	0.418923	1	ns
Cer(t18:0_25:0+O)+HCOO	219days	834days	-0.057735	0.95396	1	ns
Cer(t18:0_25:0+O)+HCOO	219days	872days	-2.88675	0.00389242	0.0389242	*
Cer(t18:0_25:0+O)+HCOO	790days	834days	0.750555	0.45292	1	ns
Cer(t18:0_25:0+O)+HCOO	790days	872days	-2.07846	0.0376669	0.226002	ns
Cer(t18:0_25:0+O)+HCOO	834days	872days	-2.82902	0.00466913	0.0419063	*
Cer(t18:0_26:0)+HCOO	2-10days	219days	2.19089	0.0284597	0.170758	ns
Cer(t18:0_26:0)+HCOO	2-10days	790days	1.09545	0.273322	0.819965	ns
Cer(t18:0_26:0)+HCOO	2-10days	834days	2.84816	0.00439732	0.0351785	*
Cer(t18:0_26:0)+HCOO	2-10days	872days	-1.75271	0.0796514	0.398257	ns
Cer(t18:0_26:0)+HCOO	219days	790days	-0.866025	0.386476	0.819965	ns
Cer(t18:0_26:0)+HCOO	219days	834days	0.519615	0.603332	0.819965	ns
Cer(t18:0_26:0)+HCOO	219days	872days	-3.11769	0.00182274	0.0164046	*
Cer(t18:0_26:0)+HCOO	790days	834days	1.38564	0.165857	0.663427	ns
Cer(t18:0_26:0)+HCOO	790days	872days	-2.25167	0.0243434	0.170404	ns
Cer(t18:0_26:0)+HCOO	834days	872days	-3.63731	0.000275504	0.00275504	**
Cer(t18:0_26:0+O)+HCOO	2-10days	219days	2.68384	0.00727818	0.0655036	ns
Cer(t18:0_26:0+O)+HCOO	2-10days	790days	2.02657	0.0427061	0.298942	ns
Cer(t18:0_26:0+O)+HCOO	2-10days	834days	3.34111	0.000834449	0.00834449	**
Cer(t18:0_26:0+O)+HCOO	2-10days	872days	0.273861	0.784191	1	ns
Cer(t18:0_26:0+O)+HCOO	219days	790days	-0.519615	0.603332	1	ns
Cer(t18:0_26:0+O)+HCOO	219days	834days	0.519615	0.603332	1	ns
Cer(t18:0_26:0+O)+HCOO	219days	872days	-1.90526	0.0567468	0.340481	ns
Cer(t18:0_26:0+O)+HCOO	790days	834days	1.03923	0.298698	1	ns
Cer(t18:0_26:0+O)+HCOO	790days	872days	-1.38564	0.165857	0.829283	ns
Cer(t18:0_26:0+O)+HCOO	834days	872days	-2.42487	0.0153138	0.122511	ns
Cer(t18:1_14:0)+HCOO	2-10days	219days	3.26808	0.00108281	0.0108281	*
Cer(t18:1_14:0)+HCOO	2-10days	790days	1.00416	0.315302	1	ns
Cer(t18:1_14:0)+HCOO	2-10days	834days	1.88051	0.060038	0.540342	ns
Cer(t18:1_14:0)+HCOO	2-10days	872days	1.5884	0.112197	0.785379	ns
Cer(t18:1_14:0)+HCOO	219days	790days	-1.78979	0.0734883	0.587907	ns
Cer(t18:1_14:0)+HCOO	219days	834days	-1.09697	0.272656	1	ns
Cer(t18:1_14:0)+HCOO	219days	872days	-1.32791	0.184209	1	ns
Cer(t18:1_14:0)+HCOO	790days	834days	0.69282	0.488422	1	ns
Cer(t18:1_14:0)+HCOO	790days	872days	0.46188	0.644167	1	ns
Cer(t18:1_14:0)+HCOO	834days	872days	-0.23094	0.817361	1	ns
Cer(t18:1_15:0)+HCOO	2-10days	219days	3.0855	0.00203208	0.0203208	*
Cer(t18:1_15:0)+HCOO	2-10days	790days	-0.63901	0.522817	1	ns
Cer(t18:1_15:0)+HCOO	2-10days	834days	2.42824	0.0151724	0.12138	ns
Cer(t18:1_15:0)+HCOO	2-10days	872days	1.40582	0.159777	0.798886	ns
Cer(t18:1_15:0)+HCOO	219days	790days	-2.94449	0.00323491	0.0291142	*
Cer(t18:1_15:0)+HCOO	219days	834days	-0.519615	0.603332	1	ns
Cer(t18:1_15:0)+HCOO	219days	872days	-1.32791	0.184209	0.798886	ns
Cer(t18:1_15:0)+HCOO	790days	834days	2.42487	0.0153138	0.12138	ns
Cer(t18:1_15:0)+HCOO	790days	872days	1.61658	0.105969	0.635813	ns
Cer(t18:1_15:0)+HCOO	834days	872days	-0.80829	0.418923	1	ns
Cer(t18:1_24:1)+HCOO	2-10days	219days	2.64733	0.00811312	0.0730181	ns
Cer(t18:1_24:1)+HCOO	2-10days	790days	0.456435	0.648077	1	ns
Cer(t18:1_24:1)+HCOO	2-10days	834days	-0.127802	0.898306	1	ns
Cer(t18:1_24:1)+HCOO	2-10days	872days	2.72036	0.00652118	0.0652118	ns
Cer(t18:1_24:1)+HCOO	219days	790days	-1.73205	0.0832645	0.44093	ns
Cer(t18:1_24:1)+HCOO	219days	834days	-2.19393	0.0282404	0.197683	ns
Cer(t18:1_24:1)+HCOO	219days	872days	0.057735	0.95396	1	ns
Cer(t18:1_24:1)+HCOO	790days	834days	-0.46188	0.644167	1	ns
Cer(t18:1_24:1)+HCOO	790days	872days	1.78979	0.0734883	0.44093	ns
Cer(t18:1_24:1)+HCOO	834days	872days	2.25167	0.0243434	0.194747	ns
Cer(t18:1_26:0)+HCOO	2-10days	219days	1.02242	0.306584	0.919753	ns
Cer(t18:1_26:0)+HCOO	2-10days	790days	-2.55604	0.0105871	0.0749981	ns
Cer(t18:1_26:0)+HCOO	2-10days	834days	1.38756	0.16527	0.66108	ns
Cer(t18:1_26:0)+HCOO	2-10days	872days	-1.89877	0.0575945	0.287973	ns
Cer(t18:1_26:0)+HCOO	219days	790days	-2.82902	0.00466913	0.0420222	*
Cer(t18:1_26:0)+HCOO	219days	834days	0.288675	0.77283	1	ns
Cer(t18:1_26:0)+HCOO	219days	872days	-2.3094	0.0209213	0.125528	ns
Cer(t18:1_26:0)+HCOO	790days	834days	3.11769	0.00182274	0.0182274	*
Cer(t18:1_26:0)+HCOO	790days	872days	0.519615	0.603332	1	ns
Cer(t18:1_26:0)+HCOO	834days	872days	-2.59808	0.00937477	0.0749981	ns
Cer(t18:1_26:0+O)+HCOO	2-10days	219days	-0.876356	0.380836	0.761673	ns
Cer(t18:1_26:0+O)+HCOO	2-10days	790days	-2.55604	0.0105871	0.0846971	ns
Cer(t18:1_26:0+O)+HCOO	2-10days	834days	1.53362	0.125122	0.625612	ns
Cer(t18:1_26:0+O)+HCOO	2-10days	872days	-2.48301	0.0130278	0.0911945	ns
Cer(t18:1_26:0+O)+HCOO	219days	790days	-1.32791	0.184209	0.736837	ns
Cer(t18:1_26:0+O)+HCOO	219days	834days	1.90526	0.0567468	0.340481	ns
Cer(t18:1_26:0+O)+HCOO	219days	872days	-1.27017	0.204024	0.736837	ns
Cer(t18:1_26:0+O)+HCOO	790days	834days	3.23316	0.00122428	0.0122428	*
Cer(t18:1_26:0+O)+HCOO	790days	872days	0.057735	0.95396	0.95396	ns
Cer(t18:1_26:0+O)+HCOO	834days	872days	-3.17543	0.00149616	0.0134655	*
Cer(t20:0_25:0)+HCOO	2-10days	219days	0.127802	0.898306	1	ns
Cer(t20:0_25:0)+HCOO	2-10days	790days	-1.77097	0.0765658	0.382829	ns
Cer(t20:0_25:0)+HCOO	2-10days	834days	2.02657	0.0427061	0.256236	ns
Cer(t20:0_25:0)+HCOO	2-10days	872days	-2.5743	0.0100444	0.0803554	ns
Cer(t20:0_25:0)+HCOO	219days	790days	-1.50111	0.133327	0.533308	ns
Cer(t20:0_25:0)+HCOO	219days	834days	1.50111	0.133327	0.533308	ns
Cer(t20:0_25:0)+HCOO	219days	872days	-2.1362	0.0326634	0.228644	ns
Cer(t20:0_25:0)+HCOO	790days	834days	3.00222	0.00268017	0.0241215	*
Cer(t20:0_25:0)+HCOO	790days	872days	-0.635085	0.525373	1	ns
Cer(t20:0_25:0)+HCOO	834days	872days	-3.63731	0.000275504	0.00275504	**
Cer(t20:0_26:0)+HCOO	2-10days	219days	0.292119	0.770196	1	ns
Cer(t20:0_26:0)+HCOO	2-10days	790days	-2.26392	0.023579	0.165053	ns
Cer(t20:0_26:0)+HCOO	2-10days	834days	1.2415	0.214419	0.857678	ns
Cer(t20:0_26:0)+HCOO	2-10days	872days	-2.48301	0.0130278	0.104222	ns
Cer(t20:0_26:0)+HCOO	219days	790days	-2.02073	0.0433081	0.216541	ns
Cer(t20:0_26:0)+HCOO	219days	834days	0.750555	0.45292	1	ns
Cer(t20:0_26:0)+HCOO	219days	872days	-2.19393	0.0282404	0.169442	ns
Cer(t20:0_26:0)+HCOO	790days	834days	2.77128	0.00558362	0.0502526	ns
Cer(t20:0_26:0)+HCOO	790days	872days	-0.173205	0.86249	1	ns
Cer(t20:0_26:0)+HCOO	834days	872days	-2.94449	0.00323491	0.0323491	*
Cer(t20:1_17:0)+HCOO	2-10days	219days	3.63836	0.000274381	0.00274381	**
Cer(t20:1_17:0)+HCOO	2-10days	790days	1.13699	0.255544	1	ns
Cer(t20:1_17:0)+HCOO	2-10days	834days	2.95617	0.00311488	0.028034	*
Cer(t20:1_17:0)+HCOO	2-10days	872days	2.27397	0.0229675	0.18374	ns
Cer(t20:1_17:0)+HCOO	219days	790days	-1.97751	0.0479842	0.33589	ns
Cer(t20:1_17:0)+HCOO	219days	834days	-0.53932	0.589666	1	ns
Cer(t20:1_17:0)+HCOO	219days	872days	-1.07864	0.280748	1	ns
Cer(t20:1_17:0)+HCOO	790days	834days	1.43819	0.150381	0.902285	ns
Cer(t20:1_17:0)+HCOO	790days	872days	0.898867	0.368723	1	ns
Cer(t20:1_17:0)+HCOO	834days	872days	-0.53932	0.589666	1	ns
Hex1Cer(d18:1_16:0)+HCOO	2-10days	219days	-0.949386	0.342424	1	ns
Hex1Cer(d18:1_16:0)+HCOO	2-10days	790days	-2.40998	0.0159534	0.122511	ns
Hex1Cer(d18:1_16:0)+HCOO	2-10days	834days	-2.84816	0.00439732	0.0439732	*
Hex1Cer(d18:1_16:0)+HCOO	2-10days	872days	0.657267	0.511009	1	ns
Hex1Cer(d18:1_16:0)+HCOO	219days	790days	-1.1547	0.248213	1	ns
Hex1Cer(d18:1_16:0)+HCOO	219days	834days	-1.50111	0.133327	0.799962	ns
Hex1Cer(d18:1_16:0)+HCOO	219days	872days	1.27017	0.204024	1	ns
Hex1Cer(d18:1_16:0)+HCOO	790days	834days	-0.34641	0.729034	1	ns
Hex1Cer(d18:1_16:0)+HCOO	790days	872days	2.42487	0.0153138	0.122511	ns
Hex1Cer(d18:1_16:0)+HCOO	834days	872days	2.77128	0.00558362	0.0502526	ns
Hex1Cer(d18:1_22:0)+HCOO	2-10days	219days	-2.75687	0.00583575	0.046686	*
Hex1Cer(d18:1_22:0)+HCOO	2-10days	790days	-1.36931	0.170904	0.683614	ns
Hex1Cer(d18:1_22:0)+HCOO	2-10days	834days	-2.39172	0.0167695	0.107197	ns
Hex1Cer(d18:1_22:0)+HCOO	2-10days	872days	1.69794	0.0895191	0.447596	ns
Hex1Cer(d18:1_22:0)+HCOO	219days	790days	1.09697	0.272656	0.817969	ns
Hex1Cer(d18:1_22:0)+HCOO	219days	834days	0.288675	0.77283	0.837847	ns
Hex1Cer(d18:1_22:0)+HCOO	219days	872days	3.52184	0.000428568	0.00428568	**
Hex1Cer(d18:1_22:0)+HCOO	790days	834days	-0.80829	0.418923	0.837847	ns
Hex1Cer(d18:1_22:0)+HCOO	790days	872days	2.42487	0.0153138	0.107197	ns
Hex1Cer(d18:1_22:0)+HCOO	834days	872days	3.23316	0.00122428	0.0110185	*
Hex1Cer(d18:1_23:0)+HCOO	2-10days	219days	-2.59255	0.00952664	0.0762131	ns
Hex1Cer(d18:1_23:0)+HCOO	2-10days	790days	-0.985901	0.324182	0.883399	ns
Hex1Cer(d18:1_23:0)+HCOO	2-10days	834days	-2.44649	0.0144253	0.100977	ns
Hex1Cer(d18:1_23:0)+HCOO	2-10days	872days	1.35105	0.17668	0.883399	ns
Hex1Cer(d18:1_23:0)+HCOO	219days	790days	1.27017	0.204024	0.883399	ns
Hex1Cer(d18:1_23:0)+HCOO	219days	834days	0.11547	0.908073	0.908073	ns
Hex1Cer(d18:1_23:0)+HCOO	219days	872days	3.11769	0.00182274	0.0182274	*
Hex1Cer(d18:1_23:0)+HCOO	790days	834days	-1.1547	0.248213	0.883399	ns
Hex1Cer(d18:1_23:0)+HCOO	790days	872days	1.84752	0.0646717	0.38803	ns
Hex1Cer(d18:1_23:0)+HCOO	834days	872days	3.00222	0.00268017	0.0241215	*
Hex1Cer(d18:1_24:0)+HCOO	2-10days	219days	-2.55604	0.0105871	0.0749981	ns
Hex1Cer(d18:1_24:0)+HCOO	2-10days	790days	-1.60665	0.108131	0.465096	ns
Hex1Cer(d18:1_24:0)+HCOO	2-10days	834days	-2.48301	0.0130278	0.0781667	ns
Hex1Cer(d18:1_24:0)+HCOO	2-10days	872days	1.67968	0.0930191	0.465096	ns
Hex1Cer(d18:1_24:0)+HCOO	219days	790days	0.750555	0.45292	1	ns
Hex1Cer(d18:1_24:0)+HCOO	219days	834days	0.057735	0.95396	1	ns
Hex1Cer(d18:1_24:0)+HCOO	219days	872days	3.34863	0.000812117	0.00812117	**
Hex1Cer(d18:1_24:0)+HCOO	790days	834days	-0.69282	0.488422	1	ns
Hex1Cer(d18:1_24:0)+HCOO	790days	872days	2.59808	0.00937477	0.0749981	ns
Hex1Cer(d18:1_24:0)+HCOO	834days	872days	3.2909	0.000998686	0.00898818	**
Hex1Cer(d18:1_24:1)+HCOO	2-10days	219days	-0.511208	0.609206	0.979045	ns
Hex1Cer(d18:1_24:1)+HCOO	2-10days	790days	-1.75271	0.0796514	0.55756	ns
Hex1Cer(d18:1_24:1)+HCOO	2-10days	834days	-2.62907	0.00856192	0.0684953	ns
Hex1Cer(d18:1_24:1)+HCOO	2-10days	872days	1.67968	0.0930191	0.55756	ns
Hex1Cer(d18:1_24:1)+HCOO	219days	790days	-0.981495	0.326348	0.979045	ns
Hex1Cer(d18:1_24:1)+HCOO	219days	834days	-1.67432	0.0940686	0.55756	ns
Hex1Cer(d18:1_24:1)+HCOO	219days	872days	1.73205	0.0832645	0.55756	ns
Hex1Cer(d18:1_24:1)+HCOO	790days	834days	-0.69282	0.488422	0.979045	ns
Hex1Cer(d18:1_24:1)+HCOO	790days	872days	2.71355	0.00665673	0.0599105	ns
Hex1Cer(d18:1_24:1)+HCOO	834days	872days	3.40637	0.000658337	0.00658337	**
Hex2Cer(d16:0_18:1)+HCOO	2-10days	219days	-2.75687	0.00583575	0.046686	*
Hex2Cer(d16:0_18:1)+HCOO	2-10days	790days	-1.36931	0.170904	0.683614	ns
Hex2Cer(d16:0_18:1)+HCOO	2-10days	834days	-2.39172	0.0167695	0.107197	ns
Hex2Cer(d16:0_18:1)+HCOO	2-10days	872days	1.69794	0.0895191	0.447596	ns
Hex2Cer(d16:0_18:1)+HCOO	219days	790days	1.09697	0.272656	0.817969	ns
Hex2Cer(d16:0_18:1)+HCOO	219days	834days	0.288675	0.77283	0.837847	ns
Hex2Cer(d16:0_18:1)+HCOO	219days	872days	3.52184	0.000428568	0.00428568	**
Hex2Cer(d16:0_18:1)+HCOO	790days	834days	-0.80829	0.418923	0.837847	ns
Hex2Cer(d16:0_18:1)+HCOO	790days	872days	2.42487	0.0153138	0.107197	ns
Hex2Cer(d16:0_18:1)+HCOO	834days	872days	3.23316	0.00122428	0.0110185	*
Hex2Cer(d18:1_24:0)+HCOO	2-10days	219days	-2.84816	0.00439732	0.0351785	*
Hex2Cer(d18:1_24:0)+HCOO	2-10days	790days	-1.09545	0.273322	0.819965	ns
Hex2Cer(d18:1_24:0)+HCOO	2-10days	834days	-2.19089	0.0284597	0.170758	ns
Hex2Cer(d18:1_24:0)+HCOO	2-10days	872days	1.75271	0.0796514	0.398257	ns
Hex2Cer(d18:1_24:0)+HCOO	219days	790days	1.38564	0.165857	0.663427	ns
Hex2Cer(d18:1_24:0)+HCOO	219days	834days	0.519615	0.603332	0.819965	ns
Hex2Cer(d18:1_24:0)+HCOO	219days	872days	3.63731	0.000275504	0.00275504	**
Hex2Cer(d18:1_24:0)+HCOO	790days	834days	-0.866025	0.386476	0.819965	ns
Hex2Cer(d18:1_24:0)+HCOO	790days	872days	2.25167	0.0243434	0.170404	ns
Hex2Cer(d18:1_24:0)+HCOO	834days	872days	3.11769	0.00182274	0.0164046	*
Hex2Cer(d18:1_24:1)+HCOO	2-10days	219days	-2.92119	0.003487	0.027896	*
Hex2Cer(d18:1_24:1)+HCOO	2-10days	790days	-1.46059	0.144127	0.576508	ns
Hex2Cer(d18:1_24:1)+HCOO	2-10days	834days	-2.26392	0.023579	0.141474	ns
Hex2Cer(d18:1_24:1)+HCOO	2-10days	872days	1.67968	0.0930191	0.465096	ns
Hex2Cer(d18:1_24:1)+HCOO	219days	790days	1.1547	0.248213	0.744639	ns
Hex2Cer(d18:1_24:1)+HCOO	219days	834days	0.519615	0.603332	1	ns
Hex2Cer(d18:1_24:1)+HCOO	219days	872days	3.63731	0.000275504	0.00275504	**
Hex2Cer(d18:1_24:1)+HCOO	790days	834days	-0.635085	0.525373	1	ns
Hex2Cer(d18:1_24:1)+HCOO	790days	872days	2.48261	0.0130425	0.0912976	ns
Hex2Cer(d18:1_24:1)+HCOO	834days	872days	3.11769	0.00182274	0.0164046	*
LPC(14:0)+HCOO	2-10days	219days	-2.71712	0.00658523	0.0526818	ns
LPC(14:0)+HCOO	2-10days	790days	-2.71712	0.00658523	0.0526818	ns
LPC(14:0)+HCOO	2-10days	834days	0.831772	0.405538	1	ns
LPC(14:0)+HCOO	2-10days	872days	-2.0517	0.0401984	0.200992	ns
LPC(14:0)+HCOO	219days	790days	0	1	1	ns
LPC(14:0)+HCOO	219days	834days	2.80565	0.00502156	0.0502156	ns
LPC(14:0)+HCOO	219days	872days	0.526059	0.598847	1	ns
LPC(14:0)+HCOO	790days	834days	2.80565	0.00502156	0.0502156	ns
LPC(14:0)+HCOO	790days	872days	0.526059	0.598847	1	ns
LPC(14:0)+HCOO	834days	872days	-2.27959	0.0226321	0.135793	ns
LPC(15:0)+HCOO	2-10days	219days	-2.37346	0.0176221	0.123355	ns
LPC(15:0)+HCOO	2-10days	790days	-2.88467	0.00391821	0.0352639	*
LPC(15:0)+HCOO	2-10days	834days	0.912871	0.36131	1	ns
LPC(15:0)+HCOO	2-10days	872days	-2.08135	0.0374023	0.187011	ns
LPC(15:0)+HCOO	219days	790days	-0.404145	0.686106	1	ns
LPC(15:0)+HCOO	219days	834days	2.59808	0.00937477	0.0749981	ns
LPC(15:0)+HCOO	219days	872days	0.23094	0.817361	1	ns
LPC(15:0)+HCOO	790days	834days	3.00222	0.00268017	0.0268017	*
LPC(15:0)+HCOO	790days	872days	0.635085	0.525373	1	ns
LPC(15:0)+HCOO	834days	872days	-2.36714	0.0179263	0.123355	ns
LPC(16:0)+HCOO	2-10days	219days	-2.08135	0.0374023	0.299218	ns
LPC(16:0)+HCOO	2-10days	790days	-3.61497	0.000300384	0.00300384	**
LPC(16:0)+HCOO	2-10days	834days	-1.86226	0.0625669	0.437968	ns
LPC(16:0)+HCOO	2-10days	872days	-2.9577	0.00309942	0.0278948	*
LPC(16:0)+HCOO	219days	790days	-1.21244	0.225346	1	ns
LPC(16:0)+HCOO	219days	834days	0.173205	0.86249	1	ns
LPC(16:0)+HCOO	219days	872days	-0.69282	0.488422	1	ns
LPC(16:0)+HCOO	790days	834days	1.38564	0.165857	0.99514	ns
LPC(16:0)+HCOO	790days	872days	0.519615	0.603332	1	ns
LPC(16:0)+HCOO	834days	872days	-0.866025	0.386476	1	ns
LPC(16:0)-CH3	2-10days	219days	-2.92756	0.00341635	0.0307472	*
LPC(16:0)-CH3	2-10days	790days	-3.25691	0.00112633	0.0112633	*
LPC(16:0)-CH3	2-10days	834days	-2.70799	0.00676918	0.0541534	ns
LPC(16:0)-CH3	2-10days	872days	-1.64675	0.0996091	0.697264	ns
LPC(16:0)-CH3	219days	790days	-0.260374	0.794575	1	ns
LPC(16:0)-CH3	219days	834days	0.173583	0.862193	1	ns
LPC(16:0)-CH3	219days	872days	1.01257	0.311267	1	ns
LPC(16:0)-CH3	790days	834days	0.433957	0.66432	1	ns
LPC(16:0)-CH3	790days	872days	1.27294	0.203039	1	ns
LPC(16:0)-CH3	834days	872days	0.838984	0.401478	1	ns
LPC(16:1)+HCOO	2-10days	219days	-2.14594	0.031878	0.255024	ns
LPC(16:1)+HCOO	2-10days	790days	-3.02632	0.00247549	0.0222794	*
LPC(16:1)+HCOO	2-10days	834days	-0.82536	0.409167	1	ns
LPC(16:1)+HCOO	2-10days	872days	-3.24642	0.00116867	0.0116867	*
LPC(16:1)+HCOO	219days	790days	-0.696005	0.486426	1	ns
LPC(16:1)+HCOO	219days	834days	1.04401	0.296482	1	ns
LPC(16:1)+HCOO	219days	872days	-0.870006	0.384297	1	ns
LPC(16:1)+HCOO	790days	834days	1.74001	0.0818568	0.491141	ns
LPC(16:1)+HCOO	790days	872days	-0.174001	0.861864	1	ns
LPC(16:1)+HCOO	834days	872days	-1.91401	0.0556184	0.389329	ns
LPC(17:0)+HCOO	2-10days	219days	-2.59538	0.00944875	0.0850387	ns
LPC(17:0)+HCOO	2-10days	790days	-2.22983	0.0257587	0.20607	ns
LPC(17:0)+HCOO	2-10days	834days	-2.08361	0.0371955	0.260368	ns
LPC(17:0)+HCOO	2-10days	872days	-3.6189	0.000295853	0.00295853	**
LPC(17:0)+HCOO	219days	790days	0.288989	0.772589	1	ns
LPC(17:0)+HCOO	219days	834days	0.404585	0.685782	1	ns
LPC(17:0)+HCOO	219days	872days	-0.80917	0.418417	1	ns
LPC(17:0)+HCOO	790days	834days	0.115596	0.907973	1	ns
LPC(17:0)+HCOO	790days	872days	-1.09816	0.272135	1	ns
LPC(17:0)+HCOO	834days	872days	-1.21376	0.224841	1	ns
LPC(18:0)+HCOO	2-10days	219days	-1.86226	0.0625669	0.437968	ns
LPC(18:0)+HCOO	2-10days	790days	-3.46891	0.000522575	0.00522575	**
LPC(18:0)+HCOO	2-10days	834days	-2.08135	0.0374023	0.299218	ns
LPC(18:0)+HCOO	2-10days	872days	-3.10376	0.00191078	0.017197	*
LPC(18:0)+HCOO	219days	790days	-1.27017	0.204024	1	ns
LPC(18:0)+HCOO	219days	834days	-0.173205	0.86249	1	ns
LPC(18:0)+HCOO	219days	872days	-0.981495	0.326348	1	ns
LPC(18:0)+HCOO	790days	834days	1.09697	0.272656	1	ns
LPC(18:0)+HCOO	790days	872days	0.288675	0.77283	1	ns
LPC(18:0)+HCOO	834days	872days	-0.80829	0.418923	1	ns
LPC(18:1)+HCOO	2-10days	219days	-1.93529	0.0529552	0.370686	ns
LPC(18:1)+HCOO	2-10days	790days	-3.39588	0.000684084	0.00684084	**
LPC(18:1)+HCOO	2-10days	834days	-2.00832	0.0446097	0.356878	ns
LPC(18:1)+HCOO	2-10days	872days	-3.17679	0.00148914	0.0134023	*
LPC(18:1)+HCOO	219days	790days	-1.1547	0.248213	1	ns
LPC(18:1)+HCOO	219days	834days	-0.057735	0.95396	1	ns
LPC(18:1)+HCOO	219days	872days	-0.981495	0.326348	1	ns
LPC(18:1)+HCOO	790days	834days	1.09697	0.272656	1	ns
LPC(18:1)+HCOO	790days	872days	0.173205	0.86249	1	ns
LPC(18:1)+HCOO	834days	872days	-0.92376	0.355611	1	ns
LPC(18:2)+HCOO	2-10days	219days	-2.50127	0.012375	0.0990001	ns
LPC(18:2)+HCOO	2-10days	790days	-3.59671	0.000322266	0.00322266	**
LPC(18:2)+HCOO	2-10days	834days	-2.64733	0.00811312	0.0730181	ns
LPC(18:2)+HCOO	2-10days	872days	-1.62491	0.104182	0.729272	ns
LPC(18:2)+HCOO	219days	790days	-0.866025	0.386476	1	ns
LPC(18:2)+HCOO	219days	834days	-0.11547	0.908073	1	ns
LPC(18:2)+HCOO	219days	872days	0.69282	0.488422	1	ns
LPC(18:2)+HCOO	790days	834days	0.750555	0.45292	1	ns
LPC(18:2)+HCOO	790days	872days	1.55885	0.119033	0.729272	ns
LPC(18:2)+HCOO	834days	872days	0.80829	0.418923	1	ns
LPC(19:0)+HCOO	2-10days	219days	-2.23253	0.0255798	0.204639	ns
LPC(19:0)+HCOO	2-10days	790days	-3.12554	0.00177476	0.0177476	*
LPC(19:0)+HCOO	2-10days	834days	-2.23253	0.0255798	0.204639	ns
LPC(19:0)+HCOO	2-10days	872days	-3.12554	0.00177476	0.0177476	*
LPC(19:0)+HCOO	219days	790days	-0.705989	0.480195	1	ns
LPC(19:0)+HCOO	219days	834days	0	1	1	ns
LPC(19:0)+HCOO	219days	872days	-0.705989	0.480195	1	ns
LPC(19:0)+HCOO	790days	834days	0.705989	0.480195	1	ns
LPC(19:0)+HCOO	790days	872days	0	1	1	ns
LPC(19:0)+HCOO	834days	872days	-0.705989	0.480195	1	ns
LPC(20:4)+HCOO	2-10days	219days	-1.94376	0.0519249	0.363474	ns
LPC(20:4)+HCOO	2-10days	790days	-3.19069	0.00141932	0.0127738	*
LPC(20:4)+HCOO	2-10days	834days	-2.01711	0.0436845	0.349476	ns
LPC(20:4)+HCOO	2-10days	872days	-3.41074	0.000647865	0.00647865	**
LPC(20:4)+HCOO	219days	790days	-0.985791	0.324236	1	ns
LPC(20:4)+HCOO	219days	834days	-0.0579877	0.953758	1	ns
LPC(20:4)+HCOO	219days	872days	-1.15975	0.246149	1	ns
LPC(20:4)+HCOO	790days	834days	0.927803	0.35351	1	ns
LPC(20:4)+HCOO	790days	872days	-0.173963	0.861894	1	ns
LPC(20:4)+HCOO	834days	872days	-1.10177	0.270563	1	ns
LPE(16:0)-H	2-10days	219days	-1.86226	0.0625669	0.453975	ns
LPE(16:0)-H	2-10days	790days	-3.17679	0.00148914	0.0148914	*
LPE(16:0)-H	2-10days	834days	-2.9577	0.00309942	0.0278948	*
LPE(16:0)-H	2-10days	872days	-0.766812	0.443194	1	ns
LPE(16:0)-H	219days	790days	-1.03923	0.298698	1	ns
LPE(16:0)-H	219days	834days	-0.866025	0.386476	1	ns
LPE(16:0)-H	219days	872days	0.866025	0.386476	1	ns
LPE(16:0)-H	790days	834days	0.173205	0.86249	1	ns
LPE(16:0)-H	790days	872days	1.90526	0.0567468	0.453975	ns
LPE(16:0)-H	834days	872days	1.73205	0.0832645	0.499587	ns
LPE(16:1e)-H	2-10days	219days	-3.45065	0.000559234	0.00559234	**
LPE(16:1e)-H	2-10days	790days	-2.28218	0.0224789	0.179831	ns
LPE(16:1e)-H	2-10days	834days	-2.64733	0.00811312	0.0730181	ns
LPE(16:1e)-H	2-10days	872days	-0.821584	0.411314	1	ns
LPE(16:1e)-H	219days	790days	0.92376	0.355611	1	ns
LPE(16:1e)-H	219days	834days	0.635085	0.525373	1	ns
LPE(16:1e)-H	219days	872days	2.07846	0.0376669	0.263668	ns
LPE(16:1e)-H	790days	834days	-0.288675	0.77283	1	ns
LPE(16:1e)-H	790days	872days	1.1547	0.248213	1	ns
LPE(16:1e)-H	834days	872days	1.44338	0.148915	0.893488	ns
LPE(18:0)-H	2-10days	219days	-1.64317	0.100348	0.702438	ns
LPE(18:0)-H	2-10days	790days	-3.61497	0.000300384	0.00300384	**
LPE(18:0)-H	2-10days	834days	-2.9577	0.00309942	0.0278948	*
LPE(18:0)-H	2-10days	872days	-2.30043	0.0214236	0.171389	ns
LPE(18:0)-H	219days	790days	-1.55885	0.119033	0.714197	ns
LPE(18:0)-H	219days	834days	-1.03923	0.298698	1	ns
LPE(18:0)-H	219days	872days	-0.519615	0.603332	1	ns
LPE(18:0)-H	790days	834days	0.519615	0.603332	1	ns
LPE(18:0)-H	790days	872days	1.03923	0.298698	1	ns
LPE(18:0)-H	834days	872days	0.519615	0.603332	1	ns
LPE(18:1)-H	2-10days	219days	-1.95354	0.0507552	0.406042	ns
LPE(18:1)-H	2-10days	790days	-3.04899	0.00229613	0.0206652	*
LPE(18:1)-H	2-10days	834days	-3.12202	0.00179616	0.0179616	*
LPE(18:1)-H	2-10days	872days	-0.785069	0.432413	1	ns
LPE(18:1)-H	219days	790days	-0.866025	0.386476	1	ns
LPE(18:1)-H	219days	834days	-0.92376	0.355611	1	ns
LPE(18:1)-H	219days	872days	0.92376	0.355611	1	ns
LPE(18:1)-H	790days	834days	-0.057735	0.95396	1	ns
LPE(18:1)-H	790days	872days	1.78979	0.0734883	0.452702	ns
LPE(18:1)-H	834days	872days	1.84752	0.0646717	0.452702	ns
LPE(18:1e)-H	2-10days	219days	-3.61497	0.000300384	0.00300384	**
LPE(18:1e)-H	2-10days	790days	-2.66558	0.00768549	0.0691694	ns
LPE(18:1e)-H	2-10days	834days	-2.59255	0.00952664	0.0762131	ns
LPE(18:1e)-H	2-10days	872days	-1.64317	0.100348	0.702438	ns
LPE(18:1e)-H	219days	790days	0.750555	0.45292	1	ns
LPE(18:1e)-H	219days	834days	0.80829	0.418923	1	ns
LPE(18:1e)-H	219days	872days	1.55885	0.119033	0.714197	ns
LPE(18:1e)-H	790days	834days	0.057735	0.95396	1	ns
LPE(18:1e)-H	790days	872days	0.80829	0.418923	1	ns
LPE(18:1e)-H	834days	872days	0.750555	0.45292	1	ns
LPE(18:2)-H	2-10days	219days	-0.676998	0.498407	1	ns
LPE(18:2)-H	2-10days	790days	-3.09223	0.00198657	0.0198657	*
LPE(18:2)-H	2-10days	834days	-3.01904	0.00253573	0.0228216	*
LPE(18:2)-H	2-10days	872days	-1.84802	0.0645993	0.449672	ns
LPE(18:2)-H	219days	790days	-1.90941	0.0562091	0.449672	ns
LPE(18:2)-H	219days	834days	-1.85155	0.0640904	0.449672	ns
LPE(18:2)-H	219days	872days	-0.925775	0.354563	1	ns
LPE(18:2)-H	790days	834days	0.0578609	0.953859	1	ns
LPE(18:2)-H	790days	872days	0.983636	0.325294	1	ns
LPE(18:2)-H	834days	872days	0.925775	0.354563	1	ns
LPE(18:2e)-H	2-10days	219days	-3.46966	0.00052111	0.0052111	**
LPE(18:2e)-H	2-10days	790days	-2.44703	0.014404	0.115232	ns
LPE(18:2e)-H	2-10days	834days	-2.52007	0.0117331	0.105598	ns
LPE(18:2e)-H	2-10days	872days	-0.913069	0.361206	1	ns
LPE(18:2e)-H	219days	790days	0.808466	0.418822	1	ns
LPE(18:2e)-H	219days	834days	0.750719	0.452822	1	ns
LPE(18:2e)-H	219days	872days	2.02117	0.0432626	0.302839	ns
LPE(18:2e)-H	790days	834days	-0.0577476	0.95395	1	ns
LPE(18:2e)-H	790days	872days	1.2127	0.225245	1	ns
LPE(18:2e)-H	834days	872days	1.27045	0.203926	1	ns
LPI(18:0)-H	2-10days	219days	-2.22741	0.0259202	0.181441	ns
LPI(18:0)-H	2-10days	790days	-2.51952	0.0117514	0.094011	ns
LPI(18:0)-H	2-10days	834days	-2.88467	0.00391821	0.0391821	*
LPI(18:0)-H	2-10days	872days	-2.88467	0.00391821	0.0391821	*
LPI(18:0)-H	219days	790days	-0.23094	0.817361	1	ns
LPI(18:0)-H	219days	834days	-0.519615	0.603332	1	ns
LPI(18:0)-H	219days	872days	-0.519615	0.603332	1	ns
LPI(18:0)-H	790days	834days	-0.288675	0.77283	1	ns
LPI(18:0)-H	790days	872days	-0.288675	0.77283	1	ns
LPI(18:0)-H	834days	872days	0	1	1	ns
LPS(18:0)-H	2-10days	219days	-2.45774	0.0139814	0.111852	ns
LPS(18:0)-H	2-10days	790days	-3.41149	0.000646089	0.00646089	**
LPS(18:0)-H	2-10days	834days	-3.04466	0.00232941	0.0209647	*
LPS(18:0)-H	2-10days	872days	-1.65072	0.0987956	0.691569	ns
LPS(18:0)-H	219days	790days	-0.754005	0.450846	1	ns
LPS(18:0)-H	219days	834days	-0.464003	0.642645	1	ns
LPS(18:0)-H	219days	872days	0.638005	0.523471	1	ns
LPS(18:0)-H	790days	834days	0.290002	0.771815	1	ns
LPS(18:0)-H	790days	872days	1.39201	0.163919	0.983516	ns
LPS(18:0)-H	834days	872days	1.10201	0.270458	1	ns
PC(16:0_14:0)+HCOO	2-10days	219days	-2.01711	0.0436845	0.305792	ns
PC(16:0_14:0)+HCOO	2-10days	790days	-3.11734	0.00182488	0.0182488	*
PC(16:0_14:0)+HCOO	2-10days	834days	-2.97065	0.00297174	0.0267457	*
PC(16:0_14:0)+HCOO	2-10days	872days	-2.4572	0.0140024	0.112019	ns
PC(16:0_14:0)+HCOO	219days	790days	-0.869815	0.384401	1	ns
PC(16:0_14:0)+HCOO	219days	834days	-0.75384	0.450945	1	ns
PC(16:0_14:0)+HCOO	219days	872days	-0.347926	0.727896	1	ns
PC(16:0_14:0)+HCOO	790days	834days	0.115975	0.907672	1	ns
PC(16:0_14:0)+HCOO	790days	872days	0.521889	0.601747	1	ns
PC(16:0_14:0)+HCOO	834days	872days	0.405914	0.684806	1	ns
PC(16:0_16:0)+HCOO	2-10days	219days	-1.64317	0.100348	0.702438	ns
PC(16:0_16:0)+HCOO	2-10days	790days	-3.39588	0.000684084	0.00684084	**
PC(16:0_16:0)+HCOO	2-10days	834days	-2.30043	0.0214236	0.171389	ns
PC(16:0_16:0)+HCOO	2-10days	872days	-3.17679	0.00148914	0.0134023	*
PC(16:0_16:0)+HCOO	219days	790days	-1.38564	0.165857	0.99514	ns
PC(16:0_16:0)+HCOO	219days	834days	-0.519615	0.603332	1	ns
PC(16:0_16:0)+HCOO	219days	872days	-1.21244	0.225346	1	ns
PC(16:0_16:0)+HCOO	790days	834days	0.866025	0.386476	1	ns
PC(16:0_16:0)+HCOO	790days	872days	0.173205	0.86249	1	ns
PC(16:0_16:0)+HCOO	834days	872days	-0.69282	0.488422	1	ns
PC(16:0_16:1)+HCOO	2-10days	219days	-0.730297	0.465209	1	ns
PC(16:0_16:1)+HCOO	2-10days	790days	-3.28634	0.001015	0.01015	*
PC(16:0_16:1)+HCOO	2-10days	834days	-2.48301	0.0130278	0.104222	ns
PC(16:0_16:1)+HCOO	2-10days	872days	-2.55604	0.0105871	0.0952842	ns
PC(16:0_16:1)+HCOO	219days	790days	-2.02073	0.0433081	0.303157	ns
PC(16:0_16:1)+HCOO	219days	834days	-1.38564	0.165857	0.893488	ns
PC(16:0_16:1)+HCOO	219days	872days	-1.44338	0.148915	0.893488	ns
PC(16:0_16:1)+HCOO	790days	834days	0.635085	0.525373	1	ns
PC(16:0_16:1)+HCOO	790days	872days	0.57735	0.563703	1	ns
PC(16:0_16:1)+HCOO	834days	872days	-0.057735	0.95396	1	ns
PC(16:0_18:1)+HCOO	2-10days	219days	-0.821584	0.411314	1	ns
PC(16:0_18:1)+HCOO	2-10days	790days	-3.01247	0.00259128	0.0233215	*
PC(16:0_18:1)+HCOO	2-10days	834days	-2.13612	0.0326698	0.261358	ns
PC(16:0_18:1)+HCOO	2-10days	872days	-3.23156	0.00123115	0.0123115	*
PC(16:0_18:1)+HCOO	219days	790days	-1.73205	0.0832645	0.499587	ns
PC(16:0_18:1)+HCOO	219days	834days	-1.03923	0.298698	1	ns
PC(16:0_18:1)+HCOO	219days	872days	-1.90526	0.0567468	0.397228	ns
PC(16:0_18:1)+HCOO	790days	834days	0.69282	0.488422	1	ns
PC(16:0_18:1)+HCOO	790days	872days	-0.173205	0.86249	1	ns
PC(16:0_18:1)+HCOO	834days	872days	-0.866025	0.386476	1	ns
PC(16:0_18:2)+HCOO	2-10days	219days	-2.08135	0.0374023	0.299218	ns
PC(16:0_18:2)+HCOO	2-10days	790days	-3.61497	0.000300384	0.00300384	**
PC(16:0_18:2)+HCOO	2-10days	834days	-2.9577	0.00309942	0.0278948	*
PC(16:0_18:2)+HCOO	2-10days	872days	-1.86226	0.0625669	0.437968	ns
PC(16:0_18:2)+HCOO	219days	790days	-1.21244	0.225346	1	ns
PC(16:0_18:2)+HCOO	219days	834days	-0.69282	0.488422	1	ns
PC(16:0_18:2)+HCOO	219days	872days	0.173205	0.86249	1	ns
PC(16:0_18:2)+HCOO	790days	834days	0.519615	0.603332	1	ns
PC(16:0_18:2)+HCOO	790days	872days	1.38564	0.165857	0.99514	ns
PC(16:0_18:2)+HCOO	834days	872days	0.866025	0.386476	1	ns
PC(16:0_20:4)+HCOO	2-10days	219days	-1.64317	0.100348	0.702438	ns
PC(16:0_20:4)+HCOO	2-10days	790days	-3.24982	0.00115478	0.0115478	*
PC(16:0_20:4)+HCOO	2-10days	834days	-2.9577	0.00309942	0.0278948	*
PC(16:0_20:4)+HCOO	2-10days	872days	-2.66558	0.00768549	0.0614839	ns
PC(16:0_20:4)+HCOO	219days	790days	-1.27017	0.204024	1	ns
PC(16:0_20:4)+HCOO	219days	834days	-1.03923	0.298698	1	ns
PC(16:0_20:4)+HCOO	219days	872days	-0.80829	0.418923	1	ns
PC(16:0_20:4)+HCOO	790days	834days	0.23094	0.817361	1	ns
PC(16:0_20:4)+HCOO	790days	872days	0.46188	0.644167	1	ns
PC(16:0_20:4)+HCOO	834days	872days	0.23094	0.817361	1	ns
PC(16:1_14:0)-CH3	2-10days	219days	3.46966	0.00052111	0.0052111	**
PC(16:1_14:0)-CH3	2-10days	790days	2.15484	0.0311741	0.249392	ns
PC(16:1_14:0)-CH3	2-10days	834days	3.10444	0.00190642	0.0171578	*
PC(16:1_14:0)-CH3	2-10days	872days	1.78962	0.0735156	0.51461	ns
PC(16:1_14:0)-CH3	219days	790days	-1.03946	0.298592	1	ns
PC(16:1_14:0)-CH3	219days	834days	-0.288738	0.772782	1	ns
PC(16:1_14:0)-CH3	219days	872days	-1.32819	0.184114	1	ns
PC(16:1_14:0)-CH3	790days	834days	0.750719	0.452822	1	ns
PC(16:1_14:0)-CH3	790days	872days	-0.288738	0.772782	1	ns
PC(16:1_14:0)-CH3	834days	872days	-1.03946	0.298592	1	ns
PC(16:1_18:2)+HCOO	2-10days	219days	-0.269703	0.787388	1	ns
PC(16:1_18:2)+HCOO	2-10days	790days	-2.01813	0.0435782	0.305047	ns
PC(16:1_18:2)+HCOO	2-10days	834days	-1.68332	0.0923129	0.461565	ns
PC(16:1_18:2)+HCOO	2-10days	872days	2.11113	0.0347614	0.278091	ns
PC(16:1_18:2)+HCOO	219days	790days	-1.38225	0.166895	0.667581	ns
PC(16:1_18:2)+HCOO	219days	834days	-1.11756	0.263754	0.791261	ns
PC(16:1_18:2)+HCOO	219days	872days	1.88221	0.0598073	0.358844	ns
PC(16:1_18:2)+HCOO	790days	834days	0.264686	0.791251	1	ns
PC(16:1_18:2)+HCOO	790days	872days	3.26446	0.00109673	0.0109673	*
PC(16:1_18:2)+HCOO	834days	872days	2.99977	0.0027018	0.0243162	*
PC(16:1e_16:0)+HCOO	2-10days	219days	-1.64317	0.100348	0.702438	ns
PC(16:1e_16:0)+HCOO	2-10days	790days	-3.03073	0.00243962	0.0219566	*
PC(16:1e_16:0)+HCOO	2-10days	834days	-3.10376	0.00191078	0.0191078	*
PC(16:1e_16:0)+HCOO	2-10days	872days	-2.73861	0.0061699	0.0493592	*
PC(16:1e_16:0)+HCOO	219days	790days	-1.09697	0.272656	1	ns
PC(16:1e_16:0)+HCOO	219days	834days	-1.1547	0.248213	1	ns
PC(16:1e_16:0)+HCOO	219days	872days	-0.866025	0.386476	1	ns
PC(16:1e_16:0)+HCOO	790days	834days	-0.057735	0.95396	1	ns
PC(16:1e_16:0)+HCOO	790days	872days	0.23094	0.817361	1	ns
PC(16:1e_16:0)+HCOO	834days	872days	0.288675	0.77283	1	ns
PC(16:1e_20:4)+HCOO	2-10days	219days	-3.03802	0.00238141	0.0238141	*
PC(16:1e_20:4)+HCOO	2-10days	790days	-3.03802	0.00238141	0.0238141	*
PC(16:1e_20:4)+HCOO	2-10days	834days	-1.68779	0.0914522	0.640165	ns
PC(16:1e_20:4)+HCOO	2-10days	872days	-3.03802	0.00238141	0.0238141	*
PC(16:1e_20:4)+HCOO	219days	790days	0	1	1	ns
PC(16:1e_20:4)+HCOO	219days	834days	1.06745	0.285769	1	ns
PC(16:1e_20:4)+HCOO	219days	872days	0	1	1	ns
PC(16:1e_20:4)+HCOO	790days	834days	1.06745	0.285769	1	ns
PC(16:1e_20:4)+HCOO	790days	872days	0	1	1	ns
PC(16:1e_20:4)+HCOO	834days	872days	-1.06745	0.285769	1	ns
PC(18:0_16:0)+HCOO	2-10days	219days	-1.64317	0.100348	0.702438	ns
PC(18:0_16:0)+HCOO	2-10days	790days	-3.61497	0.000300384	0.00300384	**
PC(18:0_16:0)+HCOO	2-10days	834days	-2.30043	0.0214236	0.171389	ns
PC(18:0_16:0)+HCOO	2-10days	872days	-2.9577	0.00309942	0.0278948	*
PC(18:0_16:0)+HCOO	219days	790days	-1.55885	0.119033	0.714197	ns
PC(18:0_16:0)+HCOO	219days	834days	-0.519615	0.603332	1	ns
PC(18:0_16:0)+HCOO	219days	872days	-1.03923	0.298698	1	ns
PC(18:0_16:0)+HCOO	790days	834days	1.03923	0.298698	1	ns
PC(18:0_16:0)+HCOO	790days	872days	0.519615	0.603332	1	ns
PC(18:0_16:0)+HCOO	834days	872days	-0.519615	0.603332	1	ns
PC(18:0_18:1)+HCOO	2-10days	219days	-1.00416	0.315302	1	ns
PC(18:0_18:1)+HCOO	2-10days	790days	-2.8299	0.00465626	0.0419063	*
PC(18:0_18:1)+HCOO	2-10days	834days	-2.17263	0.029808	0.238464	ns
PC(18:0_18:1)+HCOO	2-10days	872days	-3.48717	0.000488167	0.00488167	**
PC(18:0_18:1)+HCOO	219days	790days	-1.44338	0.148915	0.893488	ns
PC(18:0_18:1)+HCOO	219days	834days	-0.92376	0.355611	1	ns
PC(18:0_18:1)+HCOO	219days	872days	-1.96299	0.0496472	0.347531	ns
PC(18:0_18:1)+HCOO	790days	834days	0.519615	0.603332	1	ns
PC(18:0_18:1)+HCOO	790days	872days	-0.519615	0.603332	1	ns
PC(18:0_18:1)+HCOO	834days	872days	-1.03923	0.298698	1	ns
PC(18:0_18:2)+HCOO	2-10days	219days	-0.693782	0.487819	1	ns
PC(18:0_18:2)+HCOO	2-10days	790days	-3.32285	0.000891028	0.00891028	**
PC(18:0_18:2)+HCOO	2-10days	834days	-1.49711	0.134365	0.83323	ns
PC(18:0_18:2)+HCOO	2-10days	872days	-2.66558	0.00768549	0.0691694	ns
PC(18:0_18:2)+HCOO	219days	790days	-2.07846	0.0376669	0.301335	ns
PC(18:0_18:2)+HCOO	219days	834days	-0.635085	0.525373	1	ns
PC(18:0_18:2)+HCOO	219days	872days	-1.55885	0.119033	0.83323	ns
PC(18:0_18:2)+HCOO	790days	834days	1.44338	0.148915	0.83323	ns
PC(18:0_18:2)+HCOO	790days	872days	0.519615	0.603332	1	ns
PC(18:0_18:2)+HCOO	834days	872days	-0.92376	0.355611	1	ns
PC(18:0_20:4)+HCOO	2-10days	219days	-1.88535	0.0593826	0.415678	ns
PC(18:0_20:4)+HCOO	2-10days	790days	-3.21619	0.00129907	0.0129907	*
PC(18:0_20:4)+HCOO	2-10days	834days	-2.32896	0.0198611	0.158889	ns
PC(18:0_20:4)+HCOO	2-10days	872days	-3.21619	0.00129907	0.0129907	*
PC(18:0_20:4)+HCOO	219days	790days	-1.05212	0.292746	1	ns
PC(18:0_20:4)+HCOO	219days	834days	-0.350706	0.725809	1	ns
PC(18:0_20:4)+HCOO	219days	872days	-1.05212	0.292746	1	ns
PC(18:0_20:4)+HCOO	790days	834days	0.701412	0.483046	1	ns
PC(18:0_20:4)+HCOO	790days	872days	0	1	1	ns
PC(18:0_20:4)+HCOO	834days	872days	-0.701412	0.483046	1	ns
PC(18:1_18:1)+HCOO	2-10days	219days	1.93529	0.0529552	0.317731	ns
PC(18:1_18:1)+HCOO	2-10days	790days	-1.35105	0.17668	0.706719	ns
PC(18:1_18:1)+HCOO	2-10days	834days	0.985901	0.324182	0.972546	ns
PC(18:1_18:1)+HCOO	2-10days	872days	-2.15438	0.0312107	0.218475	ns
PC(18:1_18:1)+HCOO	219days	790days	-2.59808	0.00937477	0.0843729	ns
PC(18:1_18:1)+HCOO	219days	834days	-0.750555	0.45292	0.972546	ns
PC(18:1_18:1)+HCOO	219days	872days	-3.23316	0.00122428	0.0122428	*
PC(18:1_18:1)+HCOO	790days	834days	1.84752	0.0646717	0.323358	ns
PC(18:1_18:1)+HCOO	790days	872days	-0.635085	0.525373	0.972546	ns
PC(18:1_18:1)+HCOO	834days	872days	-2.48261	0.0130425	0.10434	ns
PC(18:1_18:2)+HCOO	2-10days	219days	-1.67968	0.0930191	0.744153	ns
PC(18:1_18:2)+HCOO	2-10days	790days	-2.99422	0.0027515	0.027515	*
PC(18:1_18:2)+HCOO	2-10days	834days	-1.16847	0.242615	1	ns
PC(18:1_18:2)+HCOO	2-10days	872days	0.292119	0.770196	1	ns
PC(18:1_18:2)+HCOO	219days	790days	-1.03923	0.298698	1	ns
PC(18:1_18:2)+HCOO	219days	834days	0.404145	0.686106	1	ns
PC(18:1_18:2)+HCOO	219days	872days	1.55885	0.119033	0.83323	ns
PC(18:1_18:2)+HCOO	790days	834days	1.44338	0.148915	0.893488	ns
PC(18:1_18:2)+HCOO	790days	872days	2.59808	0.00937477	0.0843729	ns
PC(18:1_18:2)+HCOO	834days	872days	1.1547	0.248213	1	ns
PC(18:1e_16:0)+HCOO	2-10days	219days	-2.44649	0.0144253	0.115403	ns
PC(18:1e_16:0)+HCOO	2-10days	790days	-3.32285	0.000891028	0.00891028	**
PC(18:1e_16:0)+HCOO	2-10days	834days	-2.9577	0.00309942	0.0278948	*
PC(18:1e_16:0)+HCOO	2-10days	872days	-1.78923	0.0735783	0.515048	ns
PC(18:1e_16:0)+HCOO	219days	790days	-0.69282	0.488422	1	ns
PC(18:1e_16:0)+HCOO	219days	834days	-0.404145	0.686106	1	ns
PC(18:1e_16:0)+HCOO	219days	872days	0.519615	0.603332	1	ns
PC(18:1e_16:0)+HCOO	790days	834days	0.288675	0.77283	1	ns
PC(18:1e_16:0)+HCOO	790days	872days	1.21244	0.225346	1	ns
PC(18:1e_16:0)+HCOO	834days	872days	0.92376	0.355611	1	ns
PC(18:2_18:2)+HCOO	2-10days	219days	1.26004	0.207656	1	ns
PC(18:2_18:2)+HCOO	2-10days	790days	-1.29656	0.194783	1	ns
PC(18:2_18:2)+HCOO	2-10days	834days	-0.346966	0.728617	1	ns
PC(18:2_18:2)+HCOO	2-10days	872days	2.57486	0.0100282	0.0902537	ns
PC(18:2_18:2)+HCOO	219days	790days	-2.02117	0.0432626	0.302839	ns
PC(18:2_18:2)+HCOO	219days	834days	-1.27045	0.203926	1	ns
PC(18:2_18:2)+HCOO	219days	872days	1.03946	0.298592	1	ns
PC(18:2_18:2)+HCOO	790days	834days	0.750719	0.452822	1	ns
PC(18:2_18:2)+HCOO	790days	872days	3.06062	0.00220878	0.0220878	*
PC(18:2_18:2)+HCOO	834days	872days	2.3099	0.0208935	0.167148	ns
PC(19:1_18:1)+HCOO	2-10days	219days	2.86641	0.0041515	0.0389242	*
PC(19:1_18:1)+HCOO	2-10days	790days	0.237346	0.812388	1	ns
PC(19:1_18:1)+HCOO	2-10days	834days	2.20915	0.0271644	0.190151	ns
PC(19:1_18:1)+HCOO	2-10days	872days	-0.785069	0.432413	1	ns
PC(19:1_18:1)+HCOO	219days	790days	-2.07846	0.0376669	0.226002	ns
PC(19:1_18:1)+HCOO	219days	834days	-0.519615	0.603332	1	ns
PC(19:1_18:1)+HCOO	219days	872days	-2.88675	0.00389242	0.0389242	*
PC(19:1_18:1)+HCOO	790days	834days	1.55885	0.119033	0.595164	ns
PC(19:1_18:1)+HCOO	790days	872days	-0.80829	0.418923	1	ns
PC(19:1_18:1)+HCOO	834days	872days	-2.36714	0.0179263	0.143411	ns
PC(19:1_18:1)-CH3	2-10days	219days	3.0855	0.00203208	0.0182887	*
PC(19:1_18:1)-CH3	2-10days	790days	1.77097	0.0765658	0.382829	ns
PC(19:1_18:1)-CH3	2-10days	834days	2.42824	0.0151724	0.106207	ns
PC(19:1_18:1)-CH3	2-10days	872days	-1.00416	0.315302	1	ns
PC(19:1_18:1)-CH3	219days	790days	-1.03923	0.298698	1	ns
PC(19:1_18:1)-CH3	219days	834days	-0.519615	0.603332	1	ns
PC(19:1_18:1)-CH3	219days	872days	-3.23316	0.00122428	0.0122428	*
PC(19:1_18:1)-CH3	790days	834days	0.519615	0.603332	1	ns
PC(19:1_18:1)-CH3	790days	872days	-2.19393	0.0282404	0.169442	ns
PC(19:1_18:1)-CH3	834days	872days	-2.71355	0.00665673	0.0532538	ns
PC(19:1_19:1)+HCOO	2-10days	219days	-1.36931	0.170904	1	ns
PC(19:1_19:1)+HCOO	2-10days	790days	-1.44234	0.149208	1	ns
PC(19:1_19:1)+HCOO	2-10days	834days	-0.63901	0.522817	1	ns
PC(19:1_19:1)+HCOO	2-10days	872days	-3.12202	0.00179616	0.0179616	*
PC(19:1_19:1)+HCOO	219days	790days	-0.057735	0.95396	1	ns
PC(19:1_19:1)+HCOO	219days	834days	0.57735	0.563703	1	ns
PC(19:1_19:1)+HCOO	219days	872days	-1.38564	0.165857	1	ns
PC(19:1_19:1)+HCOO	790days	834days	0.635085	0.525373	1	ns
PC(19:1_19:1)+HCOO	790days	872days	-1.32791	0.184209	1	ns
PC(19:1_19:1)+HCOO	834days	872days	-1.96299	0.0496472	0.446825	ns
PE(15:0_16:0)-H	2-10days	219days	3.6598	0.000252415	0.00252415	**
PE(15:0_16:0)-H	2-10days	790days	1.66354	0.0962035	0.673425	ns
PE(15:0_16:0)-H	2-10days	834days	2.99438	0.00275003	0.0247503	*
PE(15:0_16:0)-H	2-10days	872days	2.32896	0.0198611	0.158889	ns
PE(15:0_16:0)-H	219days	790days	-1.57818	0.114525	0.68715	ns
PE(15:0_16:0)-H	219days	834days	-0.526059	0.598847	1	ns
PE(15:0_16:0)-H	219days	872days	-1.05212	0.292746	1	ns
PE(15:0_16:0)-H	790days	834days	1.05212	0.292746	1	ns
PE(15:0_16:0)-H	790days	872days	0.526059	0.598847	1	ns
PE(15:0_16:0)-H	834days	872days	-0.526059	0.598847	1	ns
PE(15:0_18:1)-H	2-10days	219days	3.55309	0.000380741	0.00380741	**
PE(15:0_18:1)-H	2-10days	790days	2.4161	0.0156878	0.125503	ns
PE(15:0_18:1)-H	2-10days	834days	2.6435	0.00820549	0.0738494	ns
PE(15:0_18:1)-H	2-10days	872days	0.710617	0.477322	1	ns
PE(15:0_18:1)-H	219days	790days	-0.898867	0.368723	1	ns
PE(15:0_18:1)-H	219days	834days	-0.719094	0.472083	1	ns
PE(15:0_18:1)-H	219days	872days	-2.24717	0.0246293	0.172405	ns
PE(15:0_18:1)-H	790days	834days	0.179773	0.85733	1	ns
PE(15:0_18:1)-H	790days	872days	-1.3483	0.177562	0.887808	ns
PE(15:0_18:1)-H	834days	872days	-1.52807	0.126494	0.758964	ns
PE(16:0_16:0)-H	2-10days	219days	3.06233	0.00219619	0.0211671	*
PE(16:0_16:0)-H	2-10days	790days	1.3753	0.169039	0.845194	ns
PE(16:0_16:0)-H	2-10days	834days	2.40219	0.0162973	0.114081	ns
PE(16:0_16:0)-H	2-10days	872days	-0.825179	0.40927	1	ns
PE(16:0_16:0)-H	219days	790days	-1.33372	0.182297	0.845194	ns
PE(16:0_16:0)-H	219days	834days	-0.521889	0.601747	1	ns
PE(16:0_16:0)-H	219days	872days	-3.07335	0.00211671	0.0211671	*
PE(16:0_16:0)-H	790days	834days	0.811828	0.41689	1	ns
PE(16:0_16:0)-H	790days	872days	-1.73963	0.0819238	0.491543	ns
PE(16:0_16:0)-H	834days	872days	-2.55146	0.0107273	0.0858184	ns
PE(16:0_16:1)-H	2-10days	219days	3.46966	0.00052111	0.0052111	**
PE(16:0_16:1)-H	2-10days	790days	2.15484	0.0311741	0.249392	ns
PE(16:0_16:1)-H	2-10days	834days	3.10444	0.00190642	0.0171578	*
PE(16:0_16:1)-H	2-10days	872days	1.78962	0.0735156	0.51461	ns
PE(16:0_16:1)-H	219days	790days	-1.03946	0.298592	1	ns
PE(16:0_16:1)-H	219days	834days	-0.288738	0.772782	1	ns
PE(16:0_16:1)-H	219days	872days	-1.32819	0.184114	1	ns
PE(16:0_16:1)-H	790days	834days	0.750719	0.452822	1	ns
PE(16:0_16:1)-H	790days	872days	-0.288738	0.772782	1	ns
PE(16:0_16:1)-H	834days	872days	-1.03946	0.298592	1	ns
PE(16:0_18:1)-H	2-10days	219days	3.30459	0.000951145	0.00951145	**
PE(16:0_18:1)-H	2-10days	790days	2.06309	0.0391042	0.351938	ns
PE(16:0_18:1)-H	2-10days	834days	1.91703	0.0552343	0.38664	ns
PE(16:0_18:1)-H	2-10days	872days	0.748554	0.454126	1	ns
PE(16:0_18:1)-H	219days	790days	-0.981495	0.326348	1	ns
PE(16:0_18:1)-H	219days	834days	-1.09697	0.272656	1	ns
PE(16:0_18:1)-H	219days	872days	-2.02073	0.0433081	0.351938	ns
PE(16:0_18:1)-H	790days	834days	-0.11547	0.908073	1	ns
PE(16:0_18:1)-H	790days	872days	-1.03923	0.298698	1	ns
PE(16:0_18:1)-H	834days	872days	-0.92376	0.355611	1	ns
PE(16:0_19:0)-H	2-10days	219days	3.73311	0.000189131	0.00189131	**
PE(16:0_19:0)-H	2-10days	790days	2.52032	0.0117248	0.0937981	ns
PE(16:0_19:0)-H	2-10days	834days	2.89932	0.00373976	0.0336578	*
PE(16:0_19:0)-H	2-10days	872days	1.61073	0.107238	0.653586	ns
PE(16:0_19:0)-H	219days	790days	-0.958792	0.337664	1	ns
PE(16:0_19:0)-H	219days	834days	-0.659169	0.509787	1	ns
PE(16:0_19:0)-H	219days	872days	-1.67789	0.0933694	0.653586	ns
PE(16:0_19:0)-H	790days	834days	0.299622	0.764465	1	ns
PE(16:0_19:0)-H	790days	872days	-0.719094	0.472083	1	ns
PE(16:0_19:0)-H	834days	872days	-1.01872	0.308338	1	ns
PE(16:1_14:0)-H	2-10days	219days	2.53168	0.0113518	0.0681105	ns
PE(16:1_14:0)-H	2-10days	790days	-1.51901	0.12876	0.515042	ns
PE(16:1_14:0)-H	2-10days	834days	1.85657	0.063373	0.316865	ns
PE(16:1_14:0)-H	2-10days	872days	-1.51901	0.12876	0.515042	ns
PE(16:1_14:0)-H	219days	790days	-3.20235	0.00136311	0.0136311	*
PE(16:1_14:0)-H	219days	834days	-0.533725	0.593532	1	ns
PE(16:1_14:0)-H	219days	872days	-3.20235	0.00136311	0.0136311	*
PE(16:1_14:0)-H	790days	834days	2.66863	0.00761624	0.0609299	ns
PE(16:1_14:0)-H	790days	872days	0	1	1	ns
PE(16:1_14:0)-H	834days	872days	-2.66863	0.00761624	0.0609299	ns
PE(16:1_16:1)-H	2-10days	219days	1.91703	0.0552343	0.276171	ns
PE(16:1_16:1)-H	2-10days	790days	-1.5884	0.112197	0.448788	ns
PE(16:1_16:1)-H	2-10days	834days	2.5743	0.0100444	0.0749981	ns
PE(16:1_16:1)-H	2-10days	872days	-0.712039	0.47644	1	ns
PE(16:1_16:1)-H	219days	790days	-2.77128	0.00558362	0.0502526	ns
PE(16:1_16:1)-H	219days	834days	0.519615	0.603332	1	ns
PE(16:1_16:1)-H	219days	872days	-2.07846	0.0376669	0.226002	ns
PE(16:1_16:1)-H	790days	834days	3.2909	0.000998686	0.00998686	**
PE(16:1_16:1)-H	790days	872days	0.69282	0.488422	1	ns
PE(16:1_16:1)-H	834days	872days	-2.59808	0.00937477	0.0749981	ns
PE(16:1_18:1)-H	2-10days	219days	3.62285	0.000291371	0.00291371	**
PE(16:1_18:1)-H	2-10days	790days	1.64675	0.0996091	0.697264	ns
PE(16:1_18:1)-H	2-10days	834days	2.52502	0.0115692	0.0925536	ns
PE(16:1_18:1)-H	2-10days	872days	2.74459	0.00605873	0.0545286	ns
PE(16:1_18:1)-H	219days	790days	-1.56225	0.11823	0.709381	ns
PE(16:1_18:1)-H	219days	834days	-0.867914	0.385441	1	ns
PE(16:1_18:1)-H	219days	872days	-0.694331	0.487474	1	ns
PE(16:1_18:1)-H	790days	834days	0.694331	0.487474	1	ns
PE(16:1_18:1)-H	790days	872days	0.867914	0.385441	1	ns
PE(16:1_18:1)-H	834days	872days	0.173583	0.862193	1	ns
PE(16:1_19:0)-H	2-10days	219days	3.02566	0.00248093	0.0223284	*
PE(16:1_19:0)-H	2-10days	790days	1.70537	0.0881253	0.440626	ns
PE(16:1_19:0)-H	2-10days	834days	2.36551	0.018005	0.10803	ns
PE(16:1_19:0)-H	2-10days	872days	-1.3753	0.169039	0.676155	ns
PE(16:1_19:0)-H	219days	790days	-1.04378	0.296588	0.889764	ns
PE(16:1_19:0)-H	219days	834days	-0.521889	0.601747	1	ns
PE(16:1_19:0)-H	219days	872days	-3.47926	0.000502797	0.00502797	**
PE(16:1_19:0)-H	790days	834days	0.521889	0.601747	1	ns
PE(16:1_19:0)-H	790days	872days	-2.43548	0.0148719	0.104103	ns
PE(16:1_19:0)-H	834days	872days	-2.95737	0.00310273	0.0248218	*
PE(16:1e_20:4)-H	2-10days	219days	-2.38385	0.0171325	0.13706	ns
PE(16:1e_20:4)-H	2-10days	790days	-3.11734	0.00182488	0.0164239	*
PE(16:1e_20:4)-H	2-10days	834days	-1.65036	0.0988696	0.692087	ns
PE(16:1e_20:4)-H	2-10days	872days	-3.41074	0.000647865	0.00647865	**
PE(16:1e_20:4)-H	219days	790days	-0.579877	0.561998	1	ns
PE(16:1e_20:4)-H	219days	834days	0.579877	0.561998	1	ns
PE(16:1e_20:4)-H	219days	872days	-0.811828	0.41689	1	ns
PE(16:1e_20:4)-H	790days	834days	1.15975	0.246149	1	ns
PE(16:1e_20:4)-H	790days	872days	-0.231951	0.816576	1	ns
PE(16:1e_20:4)-H	834days	872days	-1.3917	0.164012	0.984071	ns
PE(17:1_15:0)-H	2-10days	219days	2.73008	0.00633194	0.0569875	ns
PE(17:1_15:0)-H	2-10days	790days	-0.958723	0.337698	1	ns
PE(17:1_15:0)-H	2-10days	834days	1.41526	0.156993	0.941958	ns
PE(17:1_15:0)-H	2-10days	872days	0.246529	0.805273	1	ns
PE(17:1_15:0)-H	219days	790days	-2.91625	0.00354263	0.0354263	*
PE(17:1_15:0)-H	219days	834days	-1.03946	0.298592	1	ns
PE(17:1_15:0)-H	219days	872days	-1.96342	0.0495976	0.396781	ns
PE(17:1_15:0)-H	790days	834days	1.8768	0.060546	0.423822	ns
PE(17:1_15:0)-H	790days	872days	0.952835	0.340674	1	ns
PE(17:1_15:0)-H	834days	872days	-0.923961	0.355506	1	ns
PE(18:0_18:1)-H	2-10days	219days	0.894614	0.370994	1	ns
PE(18:0_18:1)-H	2-10days	790days	-2.8299	0.00465626	0.0419063	*
PE(18:0_18:1)-H	2-10days	834days	-2.24566	0.0247256	0.173079	ns
PE(18:0_18:1)-H	2-10days	872days	-1.22325	0.221236	1	ns
PE(18:0_18:1)-H	219days	790days	-2.94449	0.00323491	0.0323491	*
PE(18:0_18:1)-H	219days	834days	-2.48261	0.0130425	0.10434	ns
PE(18:0_18:1)-H	219days	872days	-1.67432	0.0940686	0.564411	ns
PE(18:0_18:1)-H	790days	834days	0.46188	0.644167	1	ns
PE(18:0_18:1)-H	790days	872days	1.27017	0.204024	1	ns
PE(18:0_18:1)-H	834days	872days	0.80829	0.418923	1	ns
PE(18:0_20:4)-H	2-10days	219days	-1.66354	0.0962035	0.673425	ns
PE(18:0_20:4)-H	2-10days	790days	-2.55077	0.0107486	0.0859887	ns
PE(18:0_20:4)-H	2-10days	834days	-3.21619	0.00129907	0.0129907	*
PE(18:0_20:4)-H	2-10days	872days	-3.21619	0.00129907	0.0129907	*
PE(18:0_20:4)-H	219days	790days	-0.701412	0.483046	1	ns
PE(18:0_20:4)-H	219days	834days	-1.22747	0.219646	1	ns
PE(18:0_20:4)-H	219days	872days	-1.22747	0.219646	1	ns
PE(18:0_20:4)-H	790days	834days	-0.526059	0.598847	1	ns
PE(18:0_20:4)-H	790days	872days	-0.526059	0.598847	1	ns
PE(18:0_20:4)-H	834days	872days	0	1	1	ns
PE(18:1_18:1)-H	2-10days	219days	3.45065	0.000559234	0.00559234	**
PE(18:1_18:1)-H	2-10days	790days	1.04067	0.298027	1	ns
PE(18:1_18:1)-H	2-10days	834days	2.79339	0.00521596	0.0469436	*
PE(18:1_18:1)-H	2-10days	872days	1.91703	0.0552343	0.441874	ns
PE(18:1_18:1)-H	219days	790days	-1.90526	0.0567468	0.441874	ns
PE(18:1_18:1)-H	219days	834days	-0.519615	0.603332	1	ns
PE(18:1_18:1)-H	219days	872days	-1.21244	0.225346	1	ns
PE(18:1_18:1)-H	790days	834days	1.38564	0.165857	0.99514	ns
PE(18:1_18:1)-H	790days	872days	0.69282	0.488422	1	ns
PE(18:1_18:1)-H	834days	872days	-0.69282	0.488422	1	ns
PE(18:1e_20:4)-H	2-10days	219days	-3.21619	0.00129907	0.0129907	*
PE(18:1e_20:4)-H	2-10days	790days	-2.6247	0.00867245	0.0693796	ns
PE(18:1e_20:4)-H	2-10days	834days	-2.92044	0.00349532	0.0314579	*
PE(18:1e_20:4)-H	2-10days	872days	-1.88535	0.0593826	0.415678	ns
PE(18:1e_20:4)-H	219days	790days	0.467608	0.640065	1	ns
PE(18:1e_20:4)-H	219days	834days	0.233804	0.815137	1	ns
PE(18:1e_20:4)-H	219days	872days	1.05212	0.292746	1	ns
PE(18:1e_20:4)-H	790days	834days	-0.233804	0.815137	1	ns
PE(18:1e_20:4)-H	790days	872days	0.58451	0.558877	1	ns
PE(18:1e_20:4)-H	834days	872days	0.818314	0.413178	1	ns
PE(18:2_18:2)-H	2-10days	219days	2.33082	0.0197626	0.138339	ns
PE(18:2_18:2)-H	2-10days	790days	-0.322146	0.747342	1	ns
PE(18:2_18:2)-H	2-10days	834days	-0.0189498	0.984881	1	ns
PE(18:2_18:2)-H	2-10days	872days	3.01302	0.00258665	0.0258665	*
PE(18:2_18:2)-H	219days	790days	-2.09736	0.035962	0.215772	ns
PE(18:2_18:2)-H	219days	834days	-1.85766	0.0632174	0.316087	ns
PE(18:2_18:2)-H	219days	872days	0.53932	0.589666	1	ns
PE(18:2_18:2)-H	790days	834days	0.239698	0.810564	1	ns
PE(18:2_18:2)-H	790days	872days	2.63668	0.00837224	0.0753501	ns
PE(18:2_18:2)-H	834days	872days	2.39698	0.0165308	0.132247	ns
PE(19:1_16:0)-H	2-10days	219days	3.48717	0.000488167	0.00488167	**
PE(19:1_16:0)-H	2-10days	790days	2.0996	0.0357638	0.28611	ns
PE(19:1_16:0)-H	2-10days	834days	2.8299	0.00465626	0.0419063	*
PE(19:1_16:0)-H	2-10days	872days	1.07719	0.281396	1	ns
PE(19:1_16:0)-H	219days	790days	-1.09697	0.272656	1	ns
PE(19:1_16:0)-H	219days	834days	-0.519615	0.603332	1	ns
PE(19:1_16:0)-H	219days	872days	-1.90526	0.0567468	0.397228	ns
PE(19:1_16:0)-H	790days	834days	0.57735	0.563703	1	ns
PE(19:1_16:0)-H	790days	872days	-0.80829	0.418923	1	ns
PE(19:1_16:0)-H	834days	872days	-1.38564	0.165857	0.99514	ns
PE(19:1_18:1)-H	2-10days	219days	3.17679	0.00148914	0.0148914	*
PE(19:1_18:1)-H	2-10days	790days	0.328634	0.742433	1	ns
PE(19:1_18:1)-H	2-10days	834days	2.51952	0.0117514	0.105762	ns
PE(19:1_18:1)-H	2-10days	872days	0.985901	0.324182	1	ns
PE(19:1_18:1)-H	219days	790days	-2.25167	0.0243434	0.194747	ns
PE(19:1_18:1)-H	219days	834days	-0.519615	0.603332	1	ns
PE(19:1_18:1)-H	219days	872days	-1.73205	0.0832645	0.582852	ns
PE(19:1_18:1)-H	790days	834days	1.73205	0.0832645	0.582852	ns
PE(19:1_18:1)-H	790days	872days	0.519615	0.603332	1	ns
PE(19:1_18:1)-H	834days	872days	-1.21244	0.225346	1	ns
PE(19:1_19:1)-H	2-10days	219days	2.70445	0.00684174	0.0615757	ns
PE(19:1_19:1)-H	2-10days	790days	-0.511653	0.608894	1	ns
PE(19:1_19:1)-H	2-10days	834days	2.04661	0.0406963	0.244178	ns
PE(19:1_19:1)-H	2-10days	872days	-1.02331	0.306163	1	ns
PE(19:1_19:1)-H	219days	790days	-2.54255	0.0110046	0.0880367	ns
PE(19:1_19:1)-H	219days	834days	-0.520068	0.603016	1	ns
PE(19:1_19:1)-H	219days	872days	-2.94705	0.00320821	0.0320821	*
PE(19:1_19:1)-H	790days	834days	2.02249	0.0431262	0.244178	ns
PE(19:1_19:1)-H	790days	872days	-0.404497	0.685847	1	ns
PE(19:1_19:1)-H	834days	872days	-2.42698	0.015225	0.106575	ns
PE(19:1_20:1)-H	2-10days	219days	3.15853	0.00158565	0.0158565	*
PE(19:1_20:1)-H	2-10days	790days	1.844	0.0651832	0.325916	ns
PE(19:1_20:1)-H	2-10days	834days	2.50127	0.012375	0.0990001	ns
PE(19:1_20:1)-H	2-10days	872days	-0.63901	0.522817	1	ns
PE(19:1_20:1)-H	219days	790days	-1.03923	0.298698	1	ns
PE(19:1_20:1)-H	219days	834days	-0.519615	0.603332	1	ns
PE(19:1_20:1)-H	219days	872days	-3.00222	0.00268017	0.0241215	*
PE(19:1_20:1)-H	790days	834days	0.519615	0.603332	1	ns
PE(19:1_20:1)-H	790days	872days	-1.96299	0.0496472	0.297883	ns
PE(19:1_20:1)-H	834days	872days	-2.48261	0.0130425	0.0990001	ns
PG(15:0_15:0)-H	2-10days	219days	1.00503	0.314881	1	ns
PG(15:0_15:0)-H	2-10days	790days	-3.08819	0.00201379	0.0181242	*
PG(15:0_15:0)-H	2-10days	834days	-1.8456	0.0649496	0.324748	ns
PG(15:0_15:0)-H	2-10days	872days	-2.35726	0.0184105	0.128873	ns
PG(15:0_15:0)-H	219days	790days	-3.23598	0.00121227	0.0121227	*
PG(15:0_15:0)-H	219days	834days	-2.25363	0.0242197	0.145318	ns
PG(15:0_15:0)-H	219days	872days	-2.65812	0.00785771	0.0628616	ns
PG(15:0_15:0)-H	790days	834days	0.98235	0.325927	1	ns
PG(15:0_15:0)-H	790days	872days	0.577853	0.563363	1	ns
PG(15:0_15:0)-H	834days	872days	-0.404497	0.685847	1	ns
PG(15:0_16:0)-H	2-10days	219days	2.76213	0.00574248	0.0570105	ns
PG(15:0_16:0)-H	2-10days	790days	-0.734709	0.462517	1	ns
PG(15:0_16:0)-H	2-10days	834days	1.49732	0.13431	0.805862	ns
PG(15:0_16:0)-H	2-10days	872days	-0.176702	0.859742	1	ns
PG(15:0_16:0)-H	219days	790days	-2.7645	0.00570105	0.0570105	ns
PG(15:0_16:0)-H	219days	834days	-0.999925	0.317347	1	ns
PG(15:0_16:0)-H	219days	872days	-2.32335	0.0201601	0.161281	ns
PG(15:0_16:0)-H	790days	834days	1.76457	0.0776355	0.543449	ns
PG(15:0_16:0)-H	790days	872days	0.441143	0.659109	1	ns
PG(15:0_16:0)-H	834days	872days	-1.32343	0.185692	0.928462	ns
PG(15:0_17:0)-H	2-10days	219days	2.20963	0.027131	0.162786	ns
PG(15:0_17:0)-H	2-10days	790days	-1.91745	0.0551813	0.220725	ns
PG(15:0_17:0)-H	2-10days	834days	1.18699	0.235231	0.705694	ns
PG(15:0_17:0)-H	2-10days	872days	-2.20963	0.027131	0.162786	ns
PG(15:0_17:0)-H	219days	790days	-3.26274	0.00110341	0.00993072	**
PG(15:0_17:0)-H	219days	834days	-0.808466	0.418822	0.837645	ns
PG(15:0_17:0)-H	219days	872days	-3.49373	0.000476325	0.00476325	**
PG(15:0_17:0)-H	790days	834days	2.45427	0.014117	0.098819	ns
PG(15:0_17:0)-H	790days	872days	-0.23099	0.817322	0.837645	ns
PG(15:0_17:0)-H	834days	872days	-2.68526	0.00724728	0.0579783	ns
PG(16:0_16:0)-H	2-10days	219days	2.85064	0.00436317	0.0349054	*
PG(16:0_16:0)-H	2-10days	790days	-1.75424	0.0793897	0.396948	ns
PG(16:0_16:0)-H	2-10days	834days	2.1928	0.0283219	0.169932	ns
PG(16:0_16:0)-H	2-10days	872days	1.0964	0.272904	0.818713	ns
PG(16:0_16:0)-H	219days	790days	-3.64047	0.000272137	0.00272137	**
PG(16:0_16:0)-H	219days	834days	-0.520068	0.603016	0.818713	ns
PG(16:0_16:0)-H	219days	872days	-1.38685	0.165488	0.661954	ns
PG(16:0_16:0)-H	790days	834days	3.12041	0.00180602	0.0162542	*
PG(16:0_16:0)-H	790days	872days	2.25363	0.0242197	0.169538	ns
PG(16:0_16:0)-H	834days	872days	-0.866779	0.386063	0.818713	ns
PG(16:0_16:1)-H	2-10days	219days	2.0996	0.0357638	0.178819	ns
PG(16:0_16:1)-H	2-10days	790days	-1.18673	0.235333	0.730401	ns
PG(16:0_16:1)-H	2-10days	834days	2.31869	0.0204117	0.12247	ns
PG(16:0_16:1)-H	2-10days	872days	-1.33279	0.1826	0.730401	ns
PG(16:0_16:1)-H	219days	790days	-2.59808	0.00937477	0.0656234	ns
PG(16:0_16:1)-H	219days	834days	0.173205	0.86249	1	ns
PG(16:0_16:1)-H	219days	872days	-2.71355	0.00665673	0.0532538	ns
PG(16:0_16:1)-H	790days	834days	2.77128	0.00558362	0.0502526	ns
PG(16:0_16:1)-H	790days	872days	-0.11547	0.908073	1	ns
PG(16:0_16:1)-H	834days	872days	-2.88675	0.00389242	0.0389242	*
PG(16:0_18:1)-H	2-10days	219days	3.03073	0.00243962	0.0243962	*
PG(16:0_18:1)-H	2-10days	790days	0.839841	0.400997	1	ns
PG(16:0_18:1)-H	2-10days	834days	2.37346	0.0176221	0.140977	ns
PG(16:0_18:1)-H	2-10days	872days	-0.401663	0.687932	1	ns
PG(16:0_18:1)-H	219days	790days	-1.73205	0.0832645	0.499587	ns
PG(16:0_18:1)-H	219days	834days	-0.519615	0.603332	1	ns
PG(16:0_18:1)-H	219days	872days	-2.71355	0.00665673	0.0599105	ns
PG(16:0_18:1)-H	790days	834days	1.21244	0.225346	1	ns
PG(16:0_18:1)-H	790days	872days	-0.981495	0.326348	1	ns
PG(16:0_18:1)-H	834days	872days	-2.19393	0.0282404	0.197683	ns
PG(17:1_16:0)-H	2-10days	219days	3.30072	0.000964379	0.00964379	**
PG(17:1_16:0)-H	2-10days	790days	0.660144	0.509162	1	ns
PG(17:1_16:0)-H	2-10days	834days	2.64057	0.00827657	0.0744891	ns
PG(17:1_16:0)-H	2-10days	872days	1.32029	0.186739	0.933696	ns
PG(17:1_16:0)-H	219days	790days	-2.08756	0.0368378	0.294702	ns
PG(17:1_16:0)-H	219days	834days	-0.521889	0.601747	1	ns
PG(17:1_16:0)-H	219days	872days	-1.56567	0.117426	0.821985	ns
PG(17:1_16:0)-H	790days	834days	1.56567	0.117426	0.821985	ns
PG(17:1_16:0)-H	790days	872days	0.521889	0.601747	1	ns
PG(17:1_16:0)-H	834days	872days	-1.04378	0.296588	1	ns
PG(18:0_18:1)-H	2-10days	219days	2.45523	0.0140794	0.0844765	ns
PG(18:0_18:1)-H	2-10days	790days	-1.67402	0.0941265	0.376506	ns
PG(18:0_18:1)-H	2-10days	834days	1.78562	0.0741604	0.370802	ns
PG(18:0_18:1)-H	2-10days	872days	-1.67402	0.0941265	0.376506	ns
PG(18:0_18:1)-H	219days	790days	-3.26446	0.00109673	0.0109673	*
PG(18:0_18:1)-H	219days	834days	-0.529372	0.596547	1	ns
PG(18:0_18:1)-H	219days	872days	-3.26446	0.00109673	0.0109673	*
PG(18:0_18:1)-H	790days	834days	2.73509	0.00623635	0.0498908	*
PG(18:0_18:1)-H	790days	872days	0	1	1	ns
PG(18:0_18:1)-H	834days	872days	-2.73509	0.00623635	0.0498908	*
PG(18:1_18:1)-H	2-10days	219days	2.22741	0.0259202	0.155521	ns
PG(18:1_18:1)-H	2-10days	790days	-1.86226	0.0625669	0.250268	ns
PG(18:1_18:1)-H	2-10days	834days	1.27802	0.201243	0.603728	ns
PG(18:1_18:1)-H	2-10days	872days	-2.22741	0.0259202	0.155521	ns
PG(18:1_18:1)-H	219days	790days	-3.23316	0.00122428	0.0110185	*
PG(18:1_18:1)-H	219days	834days	-0.750555	0.45292	0.905841	ns
PG(18:1_18:1)-H	219days	872days	-3.52184	0.000428568	0.00428568	**
PG(18:1_18:1)-H	790days	834days	2.48261	0.0130425	0.0912976	ns
PG(18:1_18:1)-H	790days	872days	-0.288675	0.77283	0.905841	ns
PG(18:1_18:1)-H	834days	872days	-2.77128	0.00558362	0.0446689	*
PG(19:1_18:1)-H	2-10days	219days	2.86352	0.00418965	0.0418965	*
PG(19:1_18:1)-H	2-10days	790days	-0.320202	0.748815	1	ns
PG(19:1_18:1)-H	2-10days	834days	2.20482	0.0274669	0.192268	ns
PG(19:1_18:1)-H	2-10days	872days	-0.283607	0.776711	1	ns
PG(19:1_18:1)-H	219days	790days	-2.51695	0.0118375	0.106538	ns
PG(19:1_18:1)-H	219days	834days	-0.520749	0.602542	1	ns
PG(19:1_18:1)-H	219days	872days	-2.48802	0.0128456	0.106538	ns
PG(19:1_18:1)-H	790days	834days	1.9962	0.0459119	0.275471	ns
PG(19:1_18:1)-H	790days	872days	0.0289305	0.97692	1	ns
PG(19:1_18:1)-H	834days	872days	-1.96727	0.0491518	0.275471	ns
PI(16:0_16:0)-H	2-10days	219days	2.15625	0.0310641	0.186384	ns
PI(16:0_16:0)-H	2-10days	790days	2.741	0.0061253	0.061253	ns
PI(16:0_16:0)-H	2-10days	834days	2.6679	0.00763261	0.0686934	ns
PI(16:0_16:0)-H	2-10days	872days	-0.548199	0.583555	1	ns
PI(16:0_16:0)-H	219days	790days	0.462282	0.643879	1	ns
PI(16:0_16:0)-H	219days	834days	0.404497	0.685847	1	ns
PI(16:0_16:0)-H	219days	872days	-2.13806	0.0325122	0.186384	ns
PI(16:0_16:0)-H	790days	834days	-0.0577853	0.95392	1	ns
PI(16:0_16:0)-H	790days	872days	-2.60034	0.00931319	0.0745055	ns
PI(16:0_16:0)-H	834days	872days	-2.54255	0.0110046	0.0770321	ns
PI(16:0_17:0)-H	2-10days	219days	3.19069	0.00141932	0.0141932	*
PI(16:0_17:0)-H	2-10days	790days	2.09045	0.036577	0.219462	ns
PI(16:0_17:0)-H	2-10days	834days	2.3105	0.0208604	0.166883	ns
PI(16:0_17:0)-H	2-10days	872days	-0.55012	0.582237	1	ns
PI(16:0_17:0)-H	219days	790days	-0.869815	0.384401	1	ns
PI(16:0_17:0)-H	219days	834days	-0.695852	0.486521	1	ns
PI(16:0_17:0)-H	219days	872days	-2.95737	0.00310273	0.0279246	*
PI(16:0_17:0)-H	790days	834days	0.173963	0.861894	1	ns
PI(16:0_17:0)-H	790days	872days	-2.08756	0.0368378	0.219462	ns
PI(16:0_17:0)-H	834days	872days	-2.26152	0.0237271	0.166883	ns
PI(16:0_18:1)-H	2-10days	219days	2.68384	0.00727818	0.0655036	ns
PI(16:0_18:1)-H	2-10days	790days	0.273861	0.784191	1	ns
PI(16:0_18:1)-H	2-10days	834days	1.00416	0.315302	1	ns
PI(16:0_18:1)-H	2-10days	872days	-0.894614	0.370994	1	ns
PI(16:0_18:1)-H	219days	790days	-1.90526	0.0567468	0.453975	ns
PI(16:0_18:1)-H	219days	834days	-1.32791	0.184209	1	ns
PI(16:0_18:1)-H	219days	872days	-2.82902	0.00466913	0.0466913	*
PI(16:0_18:1)-H	790days	834days	0.57735	0.563703	1	ns
PI(16:0_18:1)-H	790days	872days	-0.92376	0.355611	1	ns
PI(16:0_18:1)-H	834days	872days	-1.50111	0.133327	0.933289	ns
PI(16:0_19:0)-H	2-10days	219days	2.93893	0.00329349	0.0296414	*
PI(16:0_19:0)-H	2-10days	790days	0.942675	0.345847	0.878237	ns
PI(16:0_19:0)-H	2-10days	834days	2.27351	0.0229954	0.160968	ns
PI(16:0_19:0)-H	2-10days	872days	-1.27538	0.202173	0.808693	ns
PI(16:0_19:0)-H	219days	790days	-1.57818	0.114525	0.572625	ns
PI(16:0_19:0)-H	219days	834days	-0.526059	0.598847	0.878237	ns
PI(16:0_19:0)-H	219days	872days	-3.33171	0.000863153	0.00863153	**
PI(16:0_19:0)-H	790days	834days	1.05212	0.292746	0.878237	ns
PI(16:0_19:0)-H	790days	872days	-1.75353	0.0795111	0.477067	ns
PI(16:0_19:0)-H	834days	872days	-2.80565	0.00502156	0.0401725	*
PI(17:0_17:0)-H	2-10days	219days	3.3301	0.000868156	0.00868156	**
PI(17:0_17:0)-H	2-10days	790days	2.37864	0.0173766	0.139013	ns
PI(17:0_17:0)-H	2-10days	834days	2.30545	0.0211413	0.147989	ns
PI(17:0_17:0)-H	2-10days	872days	0.182972	0.85482	1	ns
PI(17:0_17:0)-H	219days	790days	-0.752192	0.451935	1	ns
PI(17:0_17:0)-H	219days	834days	-0.810053	0.41791	1	ns
PI(17:0_17:0)-H	219days	872days	-2.48802	0.0128456	0.115611	ns
PI(17:0_17:0)-H	790days	834days	-0.0578609	0.953859	1	ns
PI(17:0_17:0)-H	790days	872days	-1.73583	0.0825942	0.495565	ns
PI(17:0_17:0)-H	834days	872days	-1.67797	0.0933534	0.495565	ns
PI(18:0_20:4)-H	2-10days	219days	-1.68779	0.0914522	0.640165	ns
PI(18:0_20:4)-H	2-10days	790days	-3.03802	0.00238141	0.0238141	*
PI(18:0_20:4)-H	2-10days	834days	-3.03802	0.00238141	0.0238141	*
PI(18:0_20:4)-H	2-10days	872days	-3.03802	0.00238141	0.0238141	*
PI(18:0_20:4)-H	219days	790days	-1.06745	0.285769	1	ns
PI(18:0_20:4)-H	219days	834days	-1.06745	0.285769	1	ns
PI(18:0_20:4)-H	219days	872days	-1.06745	0.285769	1	ns
PI(18:0_20:4)-H	790days	834days	0	1	1	ns
PI(18:0_20:4)-H	790days	872days	0	1	1	ns
PI(18:0_20:4)-H	834days	872days	0	1	1	ns
PS(18:0_18:1)-H	2-10days	219days	-1.67402	0.0941265	0.658885	ns
PS(18:0_18:1)-H	2-10days	790days	-3.12484	0.00177902	0.0177902	*
PS(18:0_18:1)-H	2-10days	834days	-2.79004	0.00527023	0.0421619	*
PS(18:0_18:1)-H	2-10days	872days	-3.12484	0.00177902	0.0177902	*
PS(18:0_18:1)-H	219days	790days	-1.14697	0.251393	1	ns
PS(18:0_18:1)-H	219days	834days	-0.882287	0.377622	1	ns
PS(18:0_18:1)-H	219days	872days	-1.14697	0.251393	1	ns
PS(18:0_18:1)-H	790days	834days	0.264686	0.791251	1	ns
PS(18:0_18:1)-H	790days	872days	0	1	1	ns
PS(18:0_18:1)-H	834days	872days	-0.264686	0.791251	1	ns

## Sheet: Prot_KW
variable	n	statistic	df	p	method	p.signif
A1AT_HUMAN	24	7.20667	4	0.125	Kruskal-Wallis	ns
PERM_HUMAN	24	6.68833	4	0.153	Kruskal-Wallis	ns
HPT_HUMAN	24	15.2483	4	0.00421	Kruskal-Wallis	**
IGG1_HUMAN	24	14.1283	4	0.0069	Kruskal-Wallis	**
S10A8_HUMAN	24	4.80667	4	0.308	Kruskal-Wallis	ns
FRIL_HUMAN	24	2.26667	4	0.687	Kruskal-Wallis	ns
HEMO_HUMAN	24	9.18167	4	0.0567	Kruskal-Wallis	ns
FRIH_HUMAN	24	4.40667	4	0.354	Kruskal-Wallis	ns
IGHG3_HUMAN	24	13.235	4	0.0102	Kruskal-Wallis	*
IGKC_HUMAN	24	7.44667	4	0.114	Kruskal-Wallis	ns
S10A9_HUMAN	24	3.41333	4	0.491	Kruskal-Wallis	ns
H2A1H_HUMAN	24	17.6067	4	0.00147	Kruskal-Wallis	**
IGHG2_HUMAN	24	3.09333	4	0.542	Kruskal-Wallis	ns
CMGA_HUMAN	24	5.10167	4	0.277	Kruskal-Wallis	ns
TRFL_HUMAN	24	3.035	4	0.552	Kruskal-Wallis	ns
PRELP_HUMAN	24	18.4333	4	0.00102	Kruskal-Wallis	**
IGLC2_HUMAN	24	12.2133	4	0.0158	Kruskal-Wallis	*
IGHA1_HUMAN	24	15.6267	4	0.00356	Kruskal-Wallis	**
ELNE_HUMAN	24	6.00833	4	0.199	Kruskal-Wallis	ns
MGP_HUMAN	24	8.14167	4	0.0865	Kruskal-Wallis	ns
CATG_HUMAN	24	6.98167	4	0.137	Kruskal-Wallis	ns
C1QA_HUMAN	24	8.62667	4	0.0711	Kruskal-Wallis	ns
CLUS_HUMAN	24	4.10667	4	0.392	Kruskal-Wallis	ns
HBA_HUMAN	24	16.0483	4	0.00295	Kruskal-Wallis	**
VIME_HUMAN	24	17.42	4	0.0016	Kruskal-Wallis	**
ALBU_HUMAN	24	7.76833	4	0.1	Kruskal-Wallis	ns
SCG1_HUMAN	24	7.92667	4	0.0943	Kruskal-Wallis	ns
A2MG_HUMAN	24	5.87333	4	0.209	Kruskal-Wallis	ns
CAP7_HUMAN	24	1.74667	4	0.782	Kruskal-Wallis	ns
A1AG1_HUMAN	24	6.61333	4	0.158	Kruskal-Wallis	ns
OSTP_HUMAN	24	5.00833	4	0.286	Kruskal-Wallis	ns
CO4A2_HUMAN	24	4.68833	4	0.321	Kruskal-Wallis	ns
THRB_HUMAN	24	3.22667	4	0.521	Kruskal-Wallis	ns
CO3A1_HUMAN	24	11.1817	4	0.0246	Kruskal-Wallis	*
OLFL3_HUMAN	24	13.68	4	0.00839	Kruskal-Wallis	**
SAMP_HUMAN	24	4.27333	4	0.37	Kruskal-Wallis	ns
ITIH1_HUMAN	24	6.435	4	0.169	Kruskal-Wallis	ns
CO6A1_HUMAN	24	2.48667	4	0.647	Kruskal-Wallis	ns
IBP1_HUMAN	24	7.59333	4	0.108	Kruskal-Wallis	ns
ASPN_HUMAN	24	17.2617	4	0.00172	Kruskal-Wallis	**
A1AG2_HUMAN	24	3.38	4	0.496	Kruskal-Wallis	ns
CATA_HUMAN	24	10.875	4	0.028	Kruskal-Wallis	*
PGCA_HUMAN	24	8.16	4	0.0859	Kruskal-Wallis	ns
SPP24_HUMAN	24	0.813333	4	0.937	Kruskal-Wallis	ns
TRFE_HUMAN	24	9.515	4	0.0494	Kruskal-Wallis	*
APOA4_HUMAN	24	5.71333	4	0.222	Kruskal-Wallis	ns
TTHY_HUMAN	24	12.7417	4	0.0126	Kruskal-Wallis	*
AACT_HUMAN	24	1.60833	4	0.807	Kruskal-Wallis	ns
HBB_HUMAN	24	14.1133	4	0.00694	Kruskal-Wallis	**
ACTB_HUMAN	24	16.3417	4	0.00259	Kruskal-Wallis	**
TENA_HUMAN	24	9.515	4	0.0494	Kruskal-Wallis	*
CO5A1_HUMAN	24	4.42167	4	0.352	Kruskal-Wallis	ns
COAA1_HUMAN	24	3.72833	4	0.444	Kruskal-Wallis	ns
G3P_HUMAN	24	6.42	4	0.17	Kruskal-Wallis	ns
HBD_HUMAN	24	8.85333	4	0.0649	Kruskal-Wallis	ns
FINC_HUMAN	24	2.26167	4	0.688	Kruskal-Wallis	ns
CO6A3_HUMAN	24	0.981667	4	0.913	Kruskal-Wallis	ns
CO5A2_HUMAN	24	4.90167	4	0.298	Kruskal-Wallis	ns
GELS_HUMAN	24	12.7133	4	0.0128	Kruskal-Wallis	*
NPM_HUMAN	24	7.68667	4	0.104	Kruskal-Wallis	ns
FMOD_HUMAN	24	8.26167	4	0.0824	Kruskal-Wallis	ns
K2C8_HUMAN	24	3.41333	4	0.491	Kruskal-Wallis	ns
PTX3_HUMAN	24	8.05333	4	0.0896	Kruskal-Wallis	ns
K2C1_HUMAN	24	8.76833	4	0.0672	Kruskal-Wallis	ns
PGS2_HUMAN	24	11.355	4	0.0229	Kruskal-Wallis	*
A1BG_HUMAN	24	10.2267	4	0.0368	Kruskal-Wallis	*
MIME_HUMAN	24	4.01333	4	0.404	Kruskal-Wallis	ns
ANT3_HUMAN	24	5.76833	4	0.217	Kruskal-Wallis	ns
COGA1_HUMAN	24	4.30667	4	0.366	Kruskal-Wallis	ns
C1QC_HUMAN	24	8.48369	4	0.0754	Kruskal-Wallis	ns
VTNC_HUMAN	24	10.5417	4	0.0322	Kruskal-Wallis	*
OSTCN_HUMAN	24	15.6483	4	0.00353	Kruskal-Wallis	**
LMNA_HUMAN	24	11.52	4	0.0213	Kruskal-Wallis	*
PROC_HUMAN	24	4.74167	4	0.315	Kruskal-Wallis	ns
CHAD_HUMAN	24	14.6617	4	0.00546	Kruskal-Wallis	**
FIBA_HUMAN	24	3.22667	4	0.521	Kruskal-Wallis	ns
CILP1_HUMAN	24	1.595	4	0.81	Kruskal-Wallis	ns
PRDX2_HUMAN	24	9.48833	4	0.05	Kruskal-Wallis	*
PGS1_HUMAN	24	3.41333	4	0.491	Kruskal-Wallis	ns
TETN_HUMAN	24	4.06167	4	0.398	Kruskal-Wallis	ns
H4_HUMAN	24	17.7133	4	0.0014	Kruskal-Wallis	**
SODE_HUMAN	24	8.92833	4	0.0629	Kruskal-Wallis	ns
PCOC1_HUMAN	24	4.48	4	0.345	Kruskal-Wallis	ns
PEDF_HUMAN	24	8.26167	4	0.0824	Kruskal-Wallis	ns
CO8A2_HUMAN	24	11.9467	4	0.0178	Kruskal-Wallis	*
CO6A2_HUMAN	24	5.25333	4	0.262	Kruskal-Wallis	ns
CRP_HUMAN	24	2.89668	4	0.575	Kruskal-Wallis	ns
CO4A_HUMAN	24	3.32833	4	0.504	Kruskal-Wallis	ns
COCA1_HUMAN	24	5.18167	4	0.269	Kruskal-Wallis	ns
EMIL1_HUMAN	24	7.00667	4	0.136	Kruskal-Wallis	ns
IBP3_HUMAN	24	6.04	4	0.196	Kruskal-Wallis	ns
APOA1_HUMAN	24	2.17333	4	0.704	Kruskal-Wallis	ns
K1C18_HUMAN	24	5.115	4	0.276	Kruskal-Wallis	ns
TPM4_HUMAN	24	16.315	4	0.00262	Kruskal-Wallis	**
CAH1_HUMAN	24	3.75333	4	0.44	Kruskal-Wallis	ns
COBA2_HUMAN	24	4.45333	4	0.348	Kruskal-Wallis	ns
FA9_HUMAN	24	7.98667	4	0.0921	Kruskal-Wallis	ns
PGAM2_HUMAN	24	6.43333	4	0.169	Kruskal-Wallis	ns
FA10_HUMAN	24	1.90167	4	0.754	Kruskal-Wallis	ns
FA7_HUMAN	24	10.8267	4	0.0286	Kruskal-Wallis	*
APOC1_HUMAN	24	3.66	4	0.454	Kruskal-Wallis	ns
IC1_HUMAN	24	9.18655	4	0.0566	Kruskal-Wallis	ns
RLA2_HUMAN	24	7.36667	4	0.118	Kruskal-Wallis	ns
LUM_HUMAN	24	6.40667	4	0.171	Kruskal-Wallis	ns
KNG1_HUMAN	24	3.10167	4	0.541	Kruskal-Wallis	ns
A2GL_HUMAN	24	1.02586	4	0.906	Kruskal-Wallis	ns
ILEU_HUMAN	24	4.25573	4	0.373	Kruskal-Wallis	ns
CSPG2_HUMAN	24	9.58	4	0.0481	Kruskal-Wallis	*
MYH7_HUMAN	24	3.24833	4	0.517	Kruskal-Wallis	ns
SPRC_HUMAN	24	4.62167	4	0.328	Kruskal-Wallis	ns
DERM_HUMAN	24	5.72833	4	0.22	Kruskal-Wallis	ns
FETUA_HUMAN	24	4.77333	4	0.311	Kruskal-Wallis	ns
ACTN1_HUMAN	24	3.49333	4	0.479	Kruskal-Wallis	ns
VTDB_HUMAN	24	5.035	4	0.284	Kruskal-Wallis	ns
OMD_HUMAN	24	4.46167	4	0.347	Kruskal-Wallis	ns
CO2A1_HUMAN	24	10.6883	4	0.0303	Kruskal-Wallis	*
CO1A2_HUMAN	24	2.08	4	0.721	Kruskal-Wallis	ns
TSP1_HUMAN	24	4.53333	4	0.339	Kruskal-Wallis	ns
PRDX1_HUMAN	24	0.805767	4	0.938	Kruskal-Wallis	ns
ITIH4_HUMAN	24	3.1	4	0.541	Kruskal-Wallis	ns
CO9_HUMAN	24	3.54667	4	0.471	Kruskal-Wallis	ns
MYH9_HUMAN	24	3.82829	4	0.43	Kruskal-Wallis	ns
BIP_HUMAN	24	3.3031	4	0.508	Kruskal-Wallis	ns
TPIS_HUMAN	24	2.88833	4	0.577	Kruskal-Wallis	ns
ITIH2_HUMAN	24	3.38589	4	0.495	Kruskal-Wallis	ns
CO3_HUMAN	24	10.2217	4	0.0369	Kruskal-Wallis	*
VWF_HUMAN	24	5.49333	4	0.24	Kruskal-Wallis	ns
CO1A1_HUMAN	24	0.693333	4	0.952	Kruskal-Wallis	ns
FIBB_HUMAN	24	2.84833	4	0.584	Kruskal-Wallis	ns
PPBT_HUMAN	24	3.12678	4	0.537	Kruskal-Wallis	ns
CATD_HUMAN	24	2.83665	4	0.586	Kruskal-Wallis	ns
CERU_HUMAN	24	0.261667	4	0.992	Kruskal-Wallis	ns

## Sheet: Prot_Dunn
variable	group1	group2	statistic	p	p.adj	p.adj.signif
A1AT_HUMAN	2-10days	219days	-0.401663	0.687932	1	ns
A1AT_HUMAN	2-10days	790days	-2.15438	0.0312107	0.280897	ns
A1AT_HUMAN	2-10days	834days	0.985901	0.324182	1	ns
A1AT_HUMAN	2-10days	872days	0.401663	0.687932	1	ns
A1AT_HUMAN	219days	790days	-1.38564	0.165857	1	ns
A1AT_HUMAN	219days	834days	1.09697	0.272656	1	ns
A1AT_HUMAN	219days	872days	0.635085	0.525373	1	ns
A1AT_HUMAN	790days	834days	2.48261	0.0130425	0.130425	ns
A1AT_HUMAN	790days	872days	2.02073	0.0433081	0.346465	ns
A1AT_HUMAN	834days	872days	-0.46188	0.644167	1	ns
PERM_HUMAN	2-10days	219days	0.456435	0.648077	1	ns
PERM_HUMAN	2-10days	790days	-0.346891	0.728673	1	ns
PERM_HUMAN	2-10days	834days	-0.273861	0.784191	1	ns
PERM_HUMAN	2-10days	872days	2.35521	0.0185124	0.185124	ns
PERM_HUMAN	219days	790days	-0.635085	0.525373	1	ns
PERM_HUMAN	219days	834days	-0.57735	0.563703	1	ns
PERM_HUMAN	219days	872days	1.50111	0.133327	0.933289	ns
PERM_HUMAN	790days	834days	0.057735	0.95396	1	ns
PERM_HUMAN	790days	872days	2.1362	0.0326634	0.293971	ns
PERM_HUMAN	834days	872days	2.07846	0.0376669	0.301335	ns
HPT_HUMAN	2-10days	219days	-2.17263	0.029808	0.268272	ns
HPT_HUMAN	2-10days	790days	-3.19505	0.00139807	0.0139807	*
HPT_HUMAN	2-10days	834days	-2.17263	0.029808	0.268272	ns
HPT_HUMAN	2-10days	872days	-1.95354	0.0507552	0.355286	ns
HPT_HUMAN	219days	790days	-0.80829	0.418923	1	ns
HPT_HUMAN	219days	834days	0	1	1	ns
HPT_HUMAN	219days	872days	0.173205	0.86249	1	ns
HPT_HUMAN	790days	834days	0.80829	0.418923	1	ns
HPT_HUMAN	790days	872days	0.981495	0.326348	1	ns
HPT_HUMAN	834days	872days	0.173205	0.86249	1	ns
IGG1_HUMAN	2-10days	219days	-2.46475	0.0137108	0.137108	ns
IGG1_HUMAN	2-10days	790days	-2.46475	0.0137108	0.137108	ns
IGG1_HUMAN	2-10days	834days	-2.31869	0.0204117	0.163294	ns
IGG1_HUMAN	2-10days	872days	-2.24566	0.0247256	0.173079	ns
IGG1_HUMAN	219days	790days	0	1	1	ns
IGG1_HUMAN	219days	834days	0.11547	0.908073	1	ns
IGG1_HUMAN	219days	872days	0.173205	0.86249	1	ns
IGG1_HUMAN	790days	834days	0.11547	0.908073	1	ns
IGG1_HUMAN	790days	872days	0.173205	0.86249	1	ns
IGG1_HUMAN	834days	872days	0.057735	0.95396	1	ns
S10A8_HUMAN	2-10days	219days	0.693782	0.487819	1	ns
S10A8_HUMAN	2-10days	790days	0.620752	0.534763	1	ns
S10A8_HUMAN	2-10days	834days	1.86226	0.0625669	0.625669	ns
S10A8_HUMAN	2-10days	872days	1.49711	0.134365	1	ns
S10A8_HUMAN	219days	790days	-0.057735	0.95396	1	ns
S10A8_HUMAN	219days	834days	0.92376	0.355611	1	ns
S10A8_HUMAN	219days	872days	0.635085	0.525373	1	ns
S10A8_HUMAN	790days	834days	0.981495	0.326348	1	ns
S10A8_HUMAN	790days	872days	0.69282	0.488422	1	ns
S10A8_HUMAN	834days	872days	-0.288675	0.77283	1	ns
FRIL_HUMAN	2-10days	219days	0.146059	0.883875	1	ns
FRIL_HUMAN	2-10days	790days	0.584237	0.559061	1	ns
FRIL_HUMAN	2-10days	834days	-0.803326	0.421786	1	ns
FRIL_HUMAN	2-10days	872days	0.949386	0.342424	1	ns
FRIL_HUMAN	219days	790days	0.34641	0.729034	1	ns
FRIL_HUMAN	219days	834days	-0.750555	0.45292	1	ns
FRIL_HUMAN	219days	872days	0.635085	0.525373	1	ns
FRIL_HUMAN	790days	834days	-1.09697	0.272656	1	ns
FRIL_HUMAN	790days	872days	0.288675	0.77283	1	ns
FRIL_HUMAN	834days	872days	1.38564	0.165857	1	ns
HEMO_HUMAN	2-10days	219days	-1.22325	0.221236	1	ns
HEMO_HUMAN	2-10days	790days	-0.63901	0.522817	1	ns
HEMO_HUMAN	2-10days	834days	-2.90293	0.0036969	0.036969	*
HEMO_HUMAN	2-10days	872days	-1.22325	0.221236	1	ns
HEMO_HUMAN	219days	790days	0.46188	0.644167	1	ns
HEMO_HUMAN	219days	834days	-1.32791	0.184209	1	ns
HEMO_HUMAN	219days	872days	0	1	1	ns
HEMO_HUMAN	790days	834days	-1.78979	0.0734883	0.661395	ns
HEMO_HUMAN	790days	872days	-0.46188	0.644167	1	ns
HEMO_HUMAN	834days	872days	1.32791	0.184209	1	ns
FRIH_HUMAN	2-10days	219days	-2.00832	0.0446097	0.446097	ns
FRIH_HUMAN	2-10days	790days	-0.182574	0.855132	1	ns
FRIH_HUMAN	2-10days	834days	-0.401663	0.687932	1	ns
FRIH_HUMAN	2-10days	872days	-0.912871	0.36131	1	ns
FRIH_HUMAN	219days	790days	1.44338	0.148915	1	ns
FRIH_HUMAN	219days	834days	1.27017	0.204024	1	ns
FRIH_HUMAN	219days	872days	0.866025	0.386476	1	ns
FRIH_HUMAN	790days	834days	-0.173205	0.86249	1	ns
FRIH_HUMAN	790days	872days	-0.57735	0.563703	1	ns
FRIH_HUMAN	834days	872days	-0.404145	0.686106	1	ns
IGHG3_HUMAN	2-10days	219days	-2.02657	0.0427061	0.341648	ns
IGHG3_HUMAN	2-10days	790days	-1.66143	0.0966281	0.676397	ns
IGHG3_HUMAN	2-10days	834days	-2.68384	0.00727818	0.0727818	ns
IGHG3_HUMAN	2-10days	872days	-2.53778	0.0111558	0.100402	ns
IGHG3_HUMAN	219days	790days	0.288675	0.77283	1	ns
IGHG3_HUMAN	219days	834days	-0.519615	0.603332	1	ns
IGHG3_HUMAN	219days	872days	-0.404145	0.686106	1	ns
IGHG3_HUMAN	790days	834days	-0.80829	0.418923	1	ns
IGHG3_HUMAN	790days	872days	-0.69282	0.488422	1	ns
IGHG3_HUMAN	834days	872days	0.11547	0.908073	1	ns
IGKC_HUMAN	2-10days	219days	0.182574	0.855132	1	ns
IGKC_HUMAN	2-10days	790days	-1.05893	0.289632	1	ns
IGKC_HUMAN	2-10days	834days	1.20499	0.228207	1	ns
IGKC_HUMAN	2-10days	872days	2.00832	0.0446097	0.401487	ns
IGKC_HUMAN	219days	790days	-0.981495	0.326348	1	ns
IGKC_HUMAN	219days	834days	0.80829	0.418923	1	ns
IGKC_HUMAN	219days	872days	1.44338	0.148915	1	ns
IGKC_HUMAN	790days	834days	1.78979	0.0734883	0.587907	ns
IGKC_HUMAN	790days	872days	2.42487	0.0153138	0.153138	ns
IGKC_HUMAN	834days	872days	0.635085	0.525373	1	ns
S10A9_HUMAN	2-10days	219days	-1.53362	0.125122	1	ns
S10A9_HUMAN	2-10days	790days	0.657267	0.511009	1	ns
S10A9_HUMAN	2-10days	834days	0.146059	0.883875	1	ns
S10A9_HUMAN	2-10days	872days	-0.146059	0.883875	1	ns
S10A9_HUMAN	219days	790days	1.73205	0.0832645	0.832645	ns
S10A9_HUMAN	219days	834days	1.32791	0.184209	1	ns
S10A9_HUMAN	219days	872days	1.09697	0.272656	1	ns
S10A9_HUMAN	790days	834days	-0.404145	0.686106	1	ns
S10A9_HUMAN	790days	872days	-0.635085	0.525373	1	ns
S10A9_HUMAN	834days	872days	-0.23094	0.817361	1	ns
H2A1H_HUMAN	2-10days	219days	-3.03073	0.00243962	0.0243962	*
H2A1H_HUMAN	2-10days	790days	-2.37346	0.0176221	0.123355	ns
H2A1H_HUMAN	2-10days	834days	-2.44649	0.0144253	0.115403	ns
H2A1H_HUMAN	2-10days	872days	-2.66558	0.00768549	0.0691694	ns
H2A1H_HUMAN	219days	790days	0.519615	0.603332	1	ns
H2A1H_HUMAN	219days	834days	0.46188	0.644167	1	ns
H2A1H_HUMAN	219days	872days	0.288675	0.77283	1	ns
H2A1H_HUMAN	790days	834days	-0.057735	0.95396	1	ns
H2A1H_HUMAN	790days	872days	-0.23094	0.817361	1	ns
H2A1H_HUMAN	834days	872days	-0.173205	0.86249	1	ns
IGHG2_HUMAN	2-10days	219days	-1.60665	0.108131	1	ns
IGHG2_HUMAN	2-10days	790days	-0.949386	0.342424	1	ns
IGHG2_HUMAN	2-10days	834days	-0.730297	0.465209	1	ns
IGHG2_HUMAN	2-10days	872days	-0.511208	0.609206	1	ns
IGHG2_HUMAN	219days	790days	0.519615	0.603332	1	ns
IGHG2_HUMAN	219days	834days	0.69282	0.488422	1	ns
IGHG2_HUMAN	219days	872days	0.866025	0.386476	1	ns
IGHG2_HUMAN	790days	834days	0.173205	0.86249	1	ns
IGHG2_HUMAN	790days	872days	0.34641	0.729034	1	ns
IGHG2_HUMAN	834days	872days	0.173205	0.86249	1	ns
CMGA_HUMAN	2-10days	219days	1.1137	0.265407	1	ns
CMGA_HUMAN	2-10days	790days	0.675524	0.499343	1	ns
CMGA_HUMAN	2-10days	834days	1.40582	0.159777	1	ns
CMGA_HUMAN	2-10days	872days	-1.00416	0.315302	1	ns
CMGA_HUMAN	219days	790days	-0.34641	0.729034	1	ns
CMGA_HUMAN	219days	834days	0.23094	0.817361	1	ns
CMGA_HUMAN	219days	872days	-1.67432	0.0940686	0.846617	ns
CMGA_HUMAN	790days	834days	0.57735	0.563703	1	ns
CMGA_HUMAN	790days	872days	-1.32791	0.184209	1	ns
CMGA_HUMAN	834days	872days	-1.90526	0.0567468	0.567468	ns
TRFL_HUMAN	2-10days	219days	-0.894614	0.370994	1	ns
TRFL_HUMAN	2-10days	790days	-0.0182574	0.985433	1	ns
TRFL_HUMAN	2-10days	834days	-1.47885	0.13918	1	ns
TRFL_HUMAN	2-10days	872days	0.200832	0.84083	1	ns
TRFL_HUMAN	219days	790days	0.69282	0.488422	1	ns
TRFL_HUMAN	219days	834days	-0.46188	0.644167	1	ns
TRFL_HUMAN	219days	872days	0.866025	0.386476	1	ns
TRFL_HUMAN	790days	834days	-1.1547	0.248213	1	ns
TRFL_HUMAN	790days	872days	0.173205	0.86249	1	ns
TRFL_HUMAN	834days	872days	1.32791	0.184209	1	ns
PRELP_HUMAN	2-10days	219days	-3.39588	0.000684084	0.00684084	**
PRELP_HUMAN	2-10days	790days	-2.08135	0.0374023	0.261816	ns
PRELP_HUMAN	2-10days	834days	-2.44649	0.0144253	0.115403	ns
PRELP_HUMAN	2-10days	872days	-2.59255	0.00952664	0.0857397	ns
PRELP_HUMAN	219days	790days	1.03923	0.298698	1	ns
PRELP_HUMAN	219days	834days	0.750555	0.45292	1	ns
PRELP_HUMAN	219days	872days	0.635085	0.525373	1	ns
PRELP_HUMAN	790days	834days	-0.288675	0.77283	1	ns
PRELP_HUMAN	790days	872days	-0.404145	0.686106	1	ns
PRELP_HUMAN	834days	872days	-0.11547	0.908073	1	ns
IGLC2_HUMAN	2-10days	219days	-0.146059	0.883875	1	ns
IGLC2_HUMAN	2-10days	790days	-2.84816	0.00439732	0.0439732	*
IGLC2_HUMAN	2-10days	834days	-2.40998	0.0159534	0.143581	ns
IGLC2_HUMAN	2-10days	872days	-0.730297	0.465209	1	ns
IGLC2_HUMAN	219days	790days	-2.1362	0.0326634	0.261308	ns
IGLC2_HUMAN	219days	834days	-1.78979	0.0734883	0.514418	ns
IGLC2_HUMAN	219days	872days	-0.46188	0.644167	1	ns
IGLC2_HUMAN	790days	834days	0.34641	0.729034	1	ns
IGLC2_HUMAN	790days	872days	1.67432	0.0940686	0.564411	ns
IGLC2_HUMAN	834days	872days	1.32791	0.184209	0.921046	ns
IGHA1_HUMAN	2-10days	219days	-2.26392	0.023579	0.188632	ns
IGHA1_HUMAN	2-10days	790days	-2.48301	0.0130278	0.11725	ns
IGHA1_HUMAN	2-10days	834days	-0.146059	0.883875	1	ns
IGHA1_HUMAN	2-10days	872days	-2.99422	0.0027515	0.027515	*
IGHA1_HUMAN	219days	790days	-0.173205	0.86249	1	ns
IGHA1_HUMAN	219days	834days	1.67432	0.0940686	0.470343	ns
IGHA1_HUMAN	219days	872days	-0.57735	0.563703	1	ns
IGHA1_HUMAN	790days	834days	1.84752	0.0646717	0.38803	ns
IGHA1_HUMAN	790days	872days	-0.404145	0.686106	1	ns
IGHA1_HUMAN	834days	872days	-2.25167	0.0243434	0.188632	ns
ELNE_HUMAN	2-10days	219days	0.237346	0.812388	1	ns
ELNE_HUMAN	2-10days	790days	-1.88051	0.060038	0.60038	ns
ELNE_HUMAN	2-10days	834days	-1.66143	0.0966281	0.846617	ns
ELNE_HUMAN	2-10days	872days	-0.346891	0.728673	1	ns
ELNE_HUMAN	219days	790days	-1.67432	0.0940686	0.846617	ns
ELNE_HUMAN	219days	834days	-1.50111	0.133327	0.933289	ns
ELNE_HUMAN	219days	872days	-0.46188	0.644167	1	ns
ELNE_HUMAN	790days	834days	0.173205	0.86249	1	ns
ELNE_HUMAN	790days	872days	1.21244	0.225346	1	ns
ELNE_HUMAN	834days	872days	1.03923	0.298698	1	ns
MGP_HUMAN	2-10days	219days	0.0912871	0.927264	1	ns
MGP_HUMAN	2-10days	790days	0.529465	0.596483	1	ns
MGP_HUMAN	2-10days	834days	-2.39172	0.0167695	0.167695	ns
MGP_HUMAN	2-10days	872days	-1.29628	0.19488	1	ns
MGP_HUMAN	219days	790days	0.34641	0.729034	1	ns
MGP_HUMAN	219days	834days	-1.96299	0.0496472	0.397178	ns
MGP_HUMAN	219days	872days	-1.09697	0.272656	1	ns
MGP_HUMAN	790days	834days	-2.3094	0.0209213	0.188292	ns
MGP_HUMAN	790days	872days	-1.44338	0.148915	1	ns
MGP_HUMAN	834days	872days	0.866025	0.386476	1	ns
CATG_HUMAN	2-10days	219days	0.456435	0.648077	1	ns
CATG_HUMAN	2-10days	790days	-0.49295	0.622048	1	ns
CATG_HUMAN	2-10days	834days	-2.31869	0.0204117	0.204117	ns
CATG_HUMAN	2-10days	872days	0.456435	0.648077	1	ns
CATG_HUMAN	219days	790days	-0.750555	0.45292	1	ns
CATG_HUMAN	219days	834days	-2.19393	0.0282404	0.254163	ns
CATG_HUMAN	219days	872days	0	1	1	ns
CATG_HUMAN	790days	834days	-1.44338	0.148915	1	ns
CATG_HUMAN	790days	872days	0.750555	0.45292	1	ns
CATG_HUMAN	834days	872days	2.19393	0.0282404	0.254163	ns
C1QA_HUMAN	2-10days	219days	-1.60665	0.108131	0.756914	ns
C1QA_HUMAN	2-10days	790days	1.31453	0.188667	0.943333	ns
C1QA_HUMAN	2-10days	834days	1.60665	0.108131	0.756914	ns
C1QA_HUMAN	2-10days	872days	0.730297	0.465209	1	ns
C1QA_HUMAN	219days	790days	2.3094	0.0209213	0.188292	ns
C1QA_HUMAN	219days	834days	2.54034	0.0110744	0.110744	ns
C1QA_HUMAN	219days	872days	1.84752	0.0646717	0.517374	ns
C1QA_HUMAN	790days	834days	0.23094	0.817361	1	ns
C1QA_HUMAN	790days	872days	-0.46188	0.644167	1	ns
C1QA_HUMAN	834days	872days	-0.69282	0.488422	1	ns
CLUS_HUMAN	2-10days	219days	-1.38756	0.16527	1	ns
CLUS_HUMAN	2-10days	790days	-1.2415	0.214419	1	ns
CLUS_HUMAN	2-10days	834days	0	1	1	ns
CLUS_HUMAN	2-10days	872days	0.584237	0.559061	1	ns
CLUS_HUMAN	219days	790days	0.11547	0.908073	1	ns
CLUS_HUMAN	219days	834days	1.09697	0.272656	1	ns
CLUS_HUMAN	219days	872days	1.55885	0.119033	1	ns
CLUS_HUMAN	790days	834days	0.981495	0.326348	1	ns
CLUS_HUMAN	790days	872days	1.44338	0.148915	1	ns
CLUS_HUMAN	834days	872days	0.46188	0.644167	1	ns
HBA_HUMAN	2-10days	219days	-3.0855	0.00203208	0.0203208	*
HBA_HUMAN	2-10days	790days	-1.25976	0.207755	1	ns
HBA_HUMAN	2-10days	834days	-2.93944	0.00328801	0.0295921	*
HBA_HUMAN	2-10days	872days	-1.91703	0.0552343	0.441874	ns
HBA_HUMAN	219days	790days	1.44338	0.148915	1	ns
HBA_HUMAN	219days	834days	0.11547	0.908073	1	ns
HBA_HUMAN	219days	872days	0.92376	0.355611	1	ns
HBA_HUMAN	790days	834days	-1.32791	0.184209	1	ns
HBA_HUMAN	790days	872days	-0.519615	0.603332	1	ns
HBA_HUMAN	834days	872days	0.80829	0.418923	1	ns
VIME_HUMAN	2-10days	219days	-2.81164	0.00492893	0.0492893	*
VIME_HUMAN	2-10days	790days	-2.37346	0.0176221	0.123355	ns
VIME_HUMAN	2-10days	834days	-2.59255	0.00952664	0.0762131	ns
VIME_HUMAN	2-10days	872days	-2.73861	0.0061699	0.0555291	ns
VIME_HUMAN	219days	790days	0.34641	0.729034	1	ns
VIME_HUMAN	219days	834days	0.173205	0.86249	1	ns
VIME_HUMAN	219days	872days	0.057735	0.95396	1	ns
VIME_HUMAN	790days	834days	-0.173205	0.86249	1	ns
VIME_HUMAN	790days	872days	-0.288675	0.77283	1	ns
VIME_HUMAN	834days	872days	-0.11547	0.908073	1	ns
ALBU_HUMAN	2-10days	219days	0.0547723	0.95632	1	ns
ALBU_HUMAN	2-10days	790days	2.17263	0.029808	0.29808	ns
ALBU_HUMAN	2-10days	834days	1.36931	0.170904	1	ns
ALBU_HUMAN	2-10days	872days	1.80748	0.0706868	0.636181	ns
ALBU_HUMAN	219days	790days	1.67432	0.0940686	0.752548	ns
ALBU_HUMAN	219days	834days	1.03923	0.298698	1	ns
ALBU_HUMAN	219days	872days	1.38564	0.165857	1	ns
ALBU_HUMAN	790days	834days	-0.635085	0.525373	1	ns
ALBU_HUMAN	790days	872days	-0.288675	0.77283	1	ns
ALBU_HUMAN	834days	872days	0.34641	0.729034	1	ns
SCG1_HUMAN	2-10days	219days	-0.182574	0.855132	1	ns
SCG1_HUMAN	2-10days	790days	-0.912871	0.36131	1	ns
SCG1_HUMAN	2-10days	834days	0.474693	0.635006	1	ns
SCG1_HUMAN	2-10days	872days	2.37346	0.0176221	0.158599	ns
SCG1_HUMAN	219days	790days	-0.57735	0.563703	1	ns
SCG1_HUMAN	219days	834days	0.519615	0.603332	1	ns
SCG1_HUMAN	219days	872days	2.02073	0.0433081	0.346465	ns
SCG1_HUMAN	790days	834days	1.09697	0.272656	1	ns
SCG1_HUMAN	790days	872days	2.59808	0.00937477	0.0937477	ns
SCG1_HUMAN	834days	872days	1.50111	0.133327	0.933289	ns
A2MG_HUMAN	2-10days	219days	-1.64317	0.100348	0.903134	ns
A2MG_HUMAN	2-10days	790days	-1.86226	0.0625669	0.625669	ns
A2MG_HUMAN	2-10days	834days	-0.182574	0.855132	1	ns
A2MG_HUMAN	2-10days	872days	0.182574	0.855132	1	ns
A2MG_HUMAN	219days	790days	-0.173205	0.86249	1	ns
A2MG_HUMAN	219days	834days	1.1547	0.248213	1	ns
A2MG_HUMAN	219days	872days	1.44338	0.148915	1	ns
A2MG_HUMAN	790days	834days	1.32791	0.184209	1	ns
A2MG_HUMAN	790days	872days	1.61658	0.105969	0.903134	ns
A2MG_HUMAN	834days	872days	0.288675	0.77283	1	ns
CAP7_HUMAN	2-10days	219days	-0.584237	0.559061	1	ns
CAP7_HUMAN	2-10days	790days	-0.876356	0.380836	1	ns
CAP7_HUMAN	2-10days	834days	-1.02242	0.306584	1	ns
CAP7_HUMAN	2-10days	872days	-0.730297	0.465209	1	ns
CAP7_HUMAN	219days	790days	-0.23094	0.817361	1	ns
CAP7_HUMAN	219days	834days	-0.34641	0.729034	1	ns
CAP7_HUMAN	219days	872days	-0.11547	0.908073	1	ns
CAP7_HUMAN	790days	834days	-0.11547	0.908073	1	ns
CAP7_HUMAN	790days	872days	0.11547	0.908073	1	ns
CAP7_HUMAN	834days	872days	0.23094	0.817361	1	ns
A1AG1_HUMAN	2-10days	219days	-1.53362	0.125122	0.752548	ns
A1AG1_HUMAN	2-10days	790days	0.949386	0.342424	1	ns
A1AG1_HUMAN	2-10days	834days	0.876356	0.380836	1	ns
A1AG1_HUMAN	2-10days	872days	-1.16847	0.242615	1	ns
A1AG1_HUMAN	219days	790days	1.96299	0.0496472	0.496472	ns
A1AG1_HUMAN	219days	834days	1.90526	0.0567468	0.510721	ns
A1AG1_HUMAN	219days	872days	0.288675	0.77283	1	ns
A1AG1_HUMAN	790days	834days	-0.057735	0.95396	1	ns
A1AG1_HUMAN	790days	872days	-1.67432	0.0940686	0.752548	ns
A1AG1_HUMAN	834days	872days	-1.61658	0.105969	0.752548	ns
OSTP_HUMAN	2-10days	219days	0.712039	0.47644	1	ns
OSTP_HUMAN	2-10days	790days	-0.0182574	0.985433	1	ns
OSTP_HUMAN	2-10days	834days	-0.383406	0.701419	1	ns
OSTP_HUMAN	2-10days	872days	-1.91703	0.0552343	0.497108	ns
OSTP_HUMAN	219days	790days	-0.57735	0.563703	1	ns
OSTP_HUMAN	219days	834days	-0.866025	0.386476	1	ns
OSTP_HUMAN	219days	872days	-2.07846	0.0376669	0.376669	ns
OSTP_HUMAN	790days	834days	-0.288675	0.77283	1	ns
OSTP_HUMAN	790days	872days	-1.50111	0.133327	1	ns
OSTP_HUMAN	834days	872days	-1.21244	0.225346	1	ns
CO4A2_HUMAN	2-10days	219days	-0.712039	0.47644	1	ns
CO4A2_HUMAN	2-10days	790days	-1.36931	0.170904	1	ns
CO4A2_HUMAN	2-10days	834days	-0.858099	0.390838	1	ns
CO4A2_HUMAN	2-10days	872days	1.04067	0.298027	1	ns
CO4A2_HUMAN	219days	790days	-0.519615	0.603332	1	ns
CO4A2_HUMAN	219days	834days	-0.11547	0.908073	1	ns
CO4A2_HUMAN	219days	872days	1.38564	0.165857	1	ns
CO4A2_HUMAN	790days	834days	0.404145	0.686106	1	ns
CO4A2_HUMAN	790days	872days	1.90526	0.0567468	0.567468	ns
CO4A2_HUMAN	834days	872days	1.50111	0.133327	1	ns
THRB_HUMAN	2-10days	219days	1.31453	0.188667	1	ns
THRB_HUMAN	2-10days	790days	0.803326	0.421786	1	ns
THRB_HUMAN	2-10days	834days	0.292119	0.770196	1	ns
THRB_HUMAN	2-10days	872days	1.38756	0.16527	1	ns
THRB_HUMAN	219days	790days	-0.404145	0.686106	1	ns
THRB_HUMAN	219days	834days	-0.80829	0.418923	1	ns
THRB_HUMAN	219days	872days	0.057735	0.95396	1	ns
THRB_HUMAN	790days	834days	-0.404145	0.686106	1	ns
THRB_HUMAN	790days	872days	0.46188	0.644167	1	ns
THRB_HUMAN	834days	872days	0.866025	0.386476	1	ns
CO3A1_HUMAN	2-10days	219days	1.51537	0.12968	0.648399	ns
CO3A1_HUMAN	2-10days	790days	1.22325	0.221236	0.730401	ns
CO3A1_HUMAN	2-10days	834days	-1.33279	0.1826	0.730401	ns
CO3A1_HUMAN	2-10days	872days	-1.844	0.0651832	0.391099	ns
CO3A1_HUMAN	219days	790days	-0.23094	0.817361	1	ns
CO3A1_HUMAN	219days	834days	-2.25167	0.0243434	0.194747	ns
CO3A1_HUMAN	219days	872days	-2.65581	0.00791179	0.0791179	ns
CO3A1_HUMAN	790days	834days	-2.02073	0.0433081	0.303157	ns
CO3A1_HUMAN	790days	872days	-2.42487	0.0153138	0.137824	ns
CO3A1_HUMAN	834days	872days	-0.404145	0.686106	1	ns
OLFL3_HUMAN	2-10days	219days	2.92119	0.003487	0.03487	*
OLFL3_HUMAN	2-10days	790days	2.26392	0.023579	0.212211	ns
OLFL3_HUMAN	2-10days	834days	0.511208	0.609206	1	ns
OLFL3_HUMAN	2-10days	872days	2.19089	0.0284597	0.227678	ns
OLFL3_HUMAN	219days	790days	-0.519615	0.603332	1	ns
OLFL3_HUMAN	219days	834days	-1.90526	0.0567468	0.397228	ns
OLFL3_HUMAN	219days	872days	-0.57735	0.563703	1	ns
OLFL3_HUMAN	790days	834days	-1.38564	0.165857	0.99514	ns
OLFL3_HUMAN	790days	872days	-0.057735	0.95396	1	ns
OLFL3_HUMAN	834days	872days	1.32791	0.184209	0.99514	ns
SAMP_HUMAN	2-10days	219days	-0.620752	0.534763	1	ns
SAMP_HUMAN	2-10days	790days	0.182574	0.855132	1	ns
SAMP_HUMAN	2-10days	834days	-0.985901	0.324182	1	ns
SAMP_HUMAN	2-10days	872days	1.42408	0.154424	1	ns
SAMP_HUMAN	219days	790days	0.635085	0.525373	1	ns
SAMP_HUMAN	219days	834days	-0.288675	0.77283	1	ns
SAMP_HUMAN	219days	872days	1.61658	0.105969	0.953719	ns
SAMP_HUMAN	790days	834days	-0.92376	0.355611	1	ns
SAMP_HUMAN	790days	872days	0.981495	0.326348	1	ns
SAMP_HUMAN	834days	872days	1.90526	0.0567468	0.567468	ns
ITIH1_HUMAN	2-10days	219days	-1.91703	0.0552343	0.552343	ns
ITIH1_HUMAN	2-10days	790days	-1.25976	0.207755	1	ns
ITIH1_HUMAN	2-10days	834days	-1.55188	0.120691	0.965526	ns
ITIH1_HUMAN	2-10days	872days	0.200832	0.84083	1	ns
ITIH1_HUMAN	219days	790days	0.519615	0.603332	1	ns
ITIH1_HUMAN	219days	834days	0.288675	0.77283	1	ns
ITIH1_HUMAN	219days	872days	1.67432	0.0940686	0.846617	ns
ITIH1_HUMAN	790days	834days	-0.23094	0.817361	1	ns
ITIH1_HUMAN	790days	872days	1.1547	0.248213	1	ns
ITIH1_HUMAN	834days	872days	1.38564	0.165857	1	ns
CO6A1_HUMAN	2-10days	219days	-1.05893	0.289632	1	ns
CO6A1_HUMAN	2-10days	790days	-0.693782	0.487819	1	ns
CO6A1_HUMAN	2-10days	834days	-1.20499	0.228207	1	ns
CO6A1_HUMAN	2-10days	872days	0.0365148	0.970872	1	ns
CO6A1_HUMAN	219days	790days	0.288675	0.77283	1	ns
CO6A1_HUMAN	219days	834days	-0.11547	0.908073	1	ns
CO6A1_HUMAN	219days	872days	0.866025	0.386476	1	ns
CO6A1_HUMAN	790days	834days	-0.404145	0.686106	1	ns
CO6A1_HUMAN	790days	872days	0.57735	0.563703	1	ns
CO6A1_HUMAN	834days	872days	0.981495	0.326348	1	ns
IBP1_HUMAN	2-10days	219days	-2.15438	0.0312107	0.312107	ns
IBP1_HUMAN	2-10days	790days	-2.00832	0.0446097	0.401487	ns
IBP1_HUMAN	2-10days	834days	-0.255604	0.798257	1	ns
IBP1_HUMAN	2-10days	872days	-0.255604	0.798257	1	ns
IBP1_HUMAN	219days	790days	0.11547	0.908073	1	ns
IBP1_HUMAN	219days	834days	1.50111	0.133327	1	ns
IBP1_HUMAN	219days	872days	1.50111	0.133327	1	ns
IBP1_HUMAN	790days	834days	1.38564	0.165857	1	ns
IBP1_HUMAN	790days	872days	1.38564	0.165857	1	ns
IBP1_HUMAN	834days	872days	0	1	1	ns
ASPN_HUMAN	2-10days	219days	-2.17263	0.029808	0.238464	ns
ASPN_HUMAN	2-10days	790days	-2.39172	0.0167695	0.150926	ns
ASPN_HUMAN	2-10days	834days	-3.41414	0.000639843	0.00639843	**
ASPN_HUMAN	2-10days	872days	-2.0996	0.0357638	0.250346	ns
ASPN_HUMAN	219days	790days	-0.173205	0.86249	1	ns
ASPN_HUMAN	219days	834days	-0.981495	0.326348	1	ns
ASPN_HUMAN	219days	872days	0.057735	0.95396	1	ns
ASPN_HUMAN	790days	834days	-0.80829	0.418923	1	ns
ASPN_HUMAN	790days	872days	0.23094	0.817361	1	ns
ASPN_HUMAN	834days	872days	1.03923	0.298698	1	ns
A1AG2_HUMAN	2-10days	219days	-1.57014	0.116383	1	ns
A1AG2_HUMAN	2-10days	790days	-0.109545	0.912771	1	ns
A1AG2_HUMAN	2-10days	834days	-0.109545	0.912771	1	ns
A1AG2_HUMAN	2-10days	872days	-1.13196	0.257651	1	ns
A1AG2_HUMAN	219days	790days	1.1547	0.248213	1	ns
A1AG2_HUMAN	219days	834days	1.1547	0.248213	1	ns
A1AG2_HUMAN	219days	872days	0.34641	0.729034	1	ns
A1AG2_HUMAN	790days	834days	0	1	1	ns
A1AG2_HUMAN	790days	872days	-0.80829	0.418923	1	ns
A1AG2_HUMAN	834days	872days	-0.80829	0.418923	1	ns
CATA_HUMAN	2-10days	219days	-1.18673	0.235333	1	ns
CATA_HUMAN	2-10days	790days	1.00416	0.315302	1	ns
CATA_HUMAN	2-10days	834days	1.36931	0.170904	1	ns
CATA_HUMAN	2-10days	872days	2.46475	0.0137108	0.123397	ns
CATA_HUMAN	219days	790days	1.73205	0.0832645	0.582852	ns
CATA_HUMAN	219days	834days	2.02073	0.0433081	0.346465	ns
CATA_HUMAN	219days	872days	2.88675	0.00389242	0.0389242	*
CATA_HUMAN	790days	834days	0.288675	0.77283	1	ns
CATA_HUMAN	790days	872days	1.1547	0.248213	1	ns
CATA_HUMAN	834days	872days	0.866025	0.386476	1	ns
PGCA_HUMAN	2-10days	219days	-2.19089	0.0284597	0.256138	ns
PGCA_HUMAN	2-10days	790days	0.730297	0.465209	1	ns
PGCA_HUMAN	2-10days	834days	-1.53362	0.125122	0.875857	ns
PGCA_HUMAN	2-10days	872days	-0.803326	0.421786	1	ns
PGCA_HUMAN	219days	790days	2.3094	0.0209213	0.209213	ns
PGCA_HUMAN	219days	834days	0.519615	0.603332	1	ns
PGCA_HUMAN	219days	872days	1.09697	0.272656	1	ns
PGCA_HUMAN	790days	834days	-1.78979	0.0734883	0.587907	ns
PGCA_HUMAN	790days	872days	-1.21244	0.225346	1	ns
PGCA_HUMAN	834days	872days	0.57735	0.563703	1	ns
SPP24_HUMAN	2-10days	219days	-0.0730297	0.941783	1	ns
SPP24_HUMAN	2-10days	790days	-0.0730297	0.941783	1	ns
SPP24_HUMAN	2-10days	834days	-0.511208	0.609206	1	ns
SPP24_HUMAN	2-10days	872days	-0.803326	0.421786	1	ns
SPP24_HUMAN	219days	790days	0	1	1	ns
SPP24_HUMAN	219days	834days	-0.34641	0.729034	1	ns
SPP24_HUMAN	219days	872days	-0.57735	0.563703	1	ns
SPP24_HUMAN	790days	834days	-0.34641	0.729034	1	ns
SPP24_HUMAN	790days	872days	-0.57735	0.563703	1	ns
SPP24_HUMAN	834days	872days	-0.23094	0.817361	1	ns
TRFE_HUMAN	2-10days	219days	-2.06309	0.0391042	0.351938	ns
TRFE_HUMAN	2-10days	790days	-2.28218	0.0224789	0.224789	ns
TRFE_HUMAN	2-10days	834days	-1.91703	0.0552343	0.441874	ns
TRFE_HUMAN	2-10days	872days	-1.18673	0.235333	1	ns
TRFE_HUMAN	219days	790days	-0.173205	0.86249	1	ns
TRFE_HUMAN	219days	834days	0.11547	0.908073	1	ns
TRFE_HUMAN	219days	872days	0.69282	0.488422	1	ns
TRFE_HUMAN	790days	834days	0.288675	0.77283	1	ns
TRFE_HUMAN	790days	872days	0.866025	0.386476	1	ns
TRFE_HUMAN	834days	872days	0.57735	0.563703	1	ns
APOA4_HUMAN	2-10days	219days	0.620752	0.534763	1	ns
APOA4_HUMAN	2-10days	790days	2.15438	0.0312107	0.312107	ns
APOA4_HUMAN	2-10days	834days	0.0365148	0.970872	1	ns
APOA4_HUMAN	2-10days	872days	1.27802	0.201243	1	ns
APOA4_HUMAN	219days	790days	1.21244	0.225346	1	ns
APOA4_HUMAN	219days	834days	-0.46188	0.644167	1	ns
APOA4_HUMAN	219days	872days	0.519615	0.603332	1	ns
APOA4_HUMAN	790days	834days	-1.67432	0.0940686	0.846617	ns
APOA4_HUMAN	790days	872days	-0.69282	0.488422	1	ns
APOA4_HUMAN	834days	872days	0.981495	0.326348	1	ns
TTHY_HUMAN	2-10days	219days	0.419921	0.674543	1	ns
TTHY_HUMAN	2-10days	790days	3.04899	0.00229613	0.0229613	*
TTHY_HUMAN	2-10days	834days	1.44234	0.149208	1	ns
TTHY_HUMAN	2-10days	872days	2.24566	0.0247256	0.222531	ns
TTHY_HUMAN	219days	790days	2.07846	0.0376669	0.301335	ns
TTHY_HUMAN	219days	834days	0.80829	0.418923	1	ns
TTHY_HUMAN	219days	872days	1.44338	0.148915	1	ns
TTHY_HUMAN	790days	834days	-1.27017	0.204024	1	ns
TTHY_HUMAN	790days	872days	-0.635085	0.525373	1	ns
TTHY_HUMAN	834days	872days	0.635085	0.525373	1	ns
AACT_HUMAN	2-10days	219days	0.967643	0.333223	1	ns
AACT_HUMAN	2-10days	790days	0.310376	0.756275	1	ns
AACT_HUMAN	2-10days	834days	-0.346891	0.728673	1	ns
AACT_HUMAN	2-10days	872days	0.675524	0.499343	1	ns
AACT_HUMAN	219days	790days	-0.519615	0.603332	1	ns
AACT_HUMAN	219days	834days	-1.03923	0.298698	1	ns
AACT_HUMAN	219days	872days	-0.23094	0.817361	1	ns
AACT_HUMAN	790days	834days	-0.519615	0.603332	1	ns
AACT_HUMAN	790days	872days	0.288675	0.77283	1	ns
AACT_HUMAN	834days	872days	0.80829	0.418923	1	ns
HBB_HUMAN	2-10days	219days	-1.64317	0.100348	0.802786	ns
HBB_HUMAN	2-10days	790days	-1.57014	0.116383	0.814681	ns
HBB_HUMAN	2-10days	834days	-3.17679	0.00148914	0.0148914	*
HBB_HUMAN	2-10days	872days	-2.37346	0.0176221	0.158599	ns
HBB_HUMAN	219days	790days	0.057735	0.95396	1	ns
HBB_HUMAN	219days	834days	-1.21244	0.225346	1	ns
HBB_HUMAN	219days	872days	-0.57735	0.563703	1	ns
HBB_HUMAN	790days	834days	-1.27017	0.204024	1	ns
HBB_HUMAN	790days	872days	-0.635085	0.525373	1	ns
HBB_HUMAN	834days	872days	0.635085	0.525373	1	ns
ACTB_HUMAN	2-10days	219days	-2.86641	0.0041515	0.0373635	*
ACTB_HUMAN	2-10days	790days	-1.62491	0.104182	0.729272	ns
ACTB_HUMAN	2-10days	834days	-2.93944	0.00328801	0.0328801	*
ACTB_HUMAN	2-10days	872days	-2.35521	0.0185124	0.148099	ns
ACTB_HUMAN	219days	790days	0.981495	0.326348	1	ns
ACTB_HUMAN	219days	834days	-0.057735	0.95396	1	ns
ACTB_HUMAN	219days	872days	0.404145	0.686106	1	ns
ACTB_HUMAN	790days	834days	-1.03923	0.298698	1	ns
ACTB_HUMAN	790days	872days	-0.57735	0.563703	1	ns
ACTB_HUMAN	834days	872days	0.46188	0.644167	1	ns
TENA_HUMAN	2-10days	219days	-2.28218	0.0224789	0.224789	ns
TENA_HUMAN	2-10days	790days	-2.06309	0.0391042	0.351938	ns
TENA_HUMAN	2-10days	834days	-0.602495	0.546845	1	ns
TENA_HUMAN	2-10days	872days	-1.91703	0.0552343	0.441874	ns
TENA_HUMAN	219days	790days	0.173205	0.86249	1	ns
TENA_HUMAN	219days	834days	1.32791	0.184209	1	ns
TENA_HUMAN	219days	872days	0.288675	0.77283	1	ns
TENA_HUMAN	790days	834days	1.1547	0.248213	1	ns
TENA_HUMAN	790days	872days	0.11547	0.908073	1	ns
TENA_HUMAN	834days	872days	-1.03923	0.298698	1	ns
CO5A1_HUMAN	2-10days	219days	-1.88051	0.060038	0.60038	ns
CO5A1_HUMAN	2-10days	790days	-1.07719	0.281396	1	ns
CO5A1_HUMAN	2-10days	834days	-0.858099	0.390838	1	ns
CO5A1_HUMAN	2-10days	872days	-1.00416	0.315302	1	ns
CO5A1_HUMAN	219days	790days	0.635085	0.525373	1	ns
CO5A1_HUMAN	219days	834days	0.80829	0.418923	1	ns
CO5A1_HUMAN	219days	872days	0.69282	0.488422	1	ns
CO5A1_HUMAN	790days	834days	0.173205	0.86249	1	ns
CO5A1_HUMAN	790days	872days	0.057735	0.95396	1	ns
CO5A1_HUMAN	834days	872days	-0.11547	0.908073	1	ns
COAA1_HUMAN	2-10days	219days	1.73445	0.0828374	0.828374	ns
COAA1_HUMAN	2-10days	790days	-0.456435	0.648077	1	ns
COAA1_HUMAN	2-10days	834days	0.200832	0.84083	1	ns
COAA1_HUMAN	2-10days	872days	0.419921	0.674543	1	ns
COAA1_HUMAN	219days	790days	-1.73205	0.0832645	0.828374	ns
COAA1_HUMAN	219days	834days	-1.21244	0.225346	1	ns
COAA1_HUMAN	219days	872days	-1.03923	0.298698	1	ns
COAA1_HUMAN	790days	834days	0.519615	0.603332	1	ns
COAA1_HUMAN	790days	872days	0.69282	0.488422	1	ns
COAA1_HUMAN	834days	872days	0.173205	0.86249	1	ns
G3P_HUMAN	2-10days	219days	-1.13196	0.257651	1	ns
G3P_HUMAN	2-10days	790days	-0.109545	0.912771	1	ns
G3P_HUMAN	2-10days	834days	-1.13196	0.257651	1	ns
G3P_HUMAN	2-10days	872days	-2.30043	0.0214236	0.214236	ns
G3P_HUMAN	219days	790days	0.80829	0.418923	1	ns
G3P_HUMAN	219days	834days	0	1	1	ns
G3P_HUMAN	219days	872days	-0.92376	0.355611	1	ns
G3P_HUMAN	790days	834days	-0.80829	0.418923	1	ns
G3P_HUMAN	790days	872days	-1.73205	0.0832645	0.749381	ns
G3P_HUMAN	834days	872days	-0.92376	0.355611	1	ns
HBD_HUMAN	2-10days	219days	-1.53362	0.125122	0.875857	ns
HBD_HUMAN	2-10days	790days	-0.292119	0.770196	1	ns
HBD_HUMAN	2-10days	834days	-2.33695	0.0194418	0.194418	ns
HBD_HUMAN	2-10days	872days	-1.9718	0.0486323	0.437691	ns
HBD_HUMAN	219days	790days	0.981495	0.326348	1	ns
HBD_HUMAN	219days	834days	-0.635085	0.525373	1	ns
HBD_HUMAN	219days	872days	-0.34641	0.729034	1	ns
HBD_HUMAN	790days	834days	-1.61658	0.105969	0.84775	ns
HBD_HUMAN	790days	872days	-1.32791	0.184209	1	ns
HBD_HUMAN	834days	872days	0.288675	0.77283	1	ns
FINC_HUMAN	2-10days	219days	1.15022	0.250054	1	ns
FINC_HUMAN	2-10days	790days	-0.456435	0.648077	1	ns
FINC_HUMAN	2-10days	834days	0.63901	0.522817	1	ns
FINC_HUMAN	2-10days	872days	0.56598	0.571407	1	ns
FINC_HUMAN	219days	790days	-1.27017	0.204024	1	ns
FINC_HUMAN	219days	834days	-0.404145	0.686106	1	ns
FINC_HUMAN	219days	872days	-0.46188	0.644167	1	ns
FINC_HUMAN	790days	834days	0.866025	0.386476	1	ns
FINC_HUMAN	790days	872days	0.80829	0.418923	1	ns
FINC_HUMAN	834days	872days	-0.057735	0.95396	1	ns
CO6A3_HUMAN	2-10days	219days	-0.63901	0.522817	1	ns
CO6A3_HUMAN	2-10days	790days	-0.127802	0.898306	1	ns
CO6A3_HUMAN	2-10days	834days	0.0182574	0.985433	1	ns
CO6A3_HUMAN	2-10days	872days	0.602495	0.546845	1	ns
CO6A3_HUMAN	219days	790days	0.404145	0.686106	1	ns
CO6A3_HUMAN	219days	834days	0.519615	0.603332	1	ns
CO6A3_HUMAN	219days	872days	0.981495	0.326348	1	ns
CO6A3_HUMAN	790days	834days	0.11547	0.908073	1	ns
CO6A3_HUMAN	790days	872days	0.57735	0.563703	1	ns
CO6A3_HUMAN	834days	872days	0.46188	0.644167	1	ns
CO5A2_HUMAN	2-10days	219days	-2.06309	0.0391042	0.391042	ns
CO5A2_HUMAN	2-10days	790days	-0.967643	0.333223	1	ns
CO5A2_HUMAN	2-10days	834days	-1.04067	0.298027	1	ns
CO5A2_HUMAN	2-10days	872days	-0.456435	0.648077	1	ns
CO5A2_HUMAN	219days	790days	0.866025	0.386476	1	ns
CO5A2_HUMAN	219days	834days	0.80829	0.418923	1	ns
CO5A2_HUMAN	219days	872days	1.27017	0.204024	1	ns
CO5A2_HUMAN	790days	834days	-0.057735	0.95396	1	ns
CO5A2_HUMAN	790days	872days	0.404145	0.686106	1	ns
CO5A2_HUMAN	834days	872days	0.46188	0.644167	1	ns
GELS_HUMAN	2-10days	219days	-2.37346	0.0176221	0.158599	ns
GELS_HUMAN	2-10days	790days	-1.64317	0.100348	0.702438	ns
GELS_HUMAN	2-10days	834days	-2.08135	0.0374023	0.299218	ns
GELS_HUMAN	2-10days	872days	-2.66558	0.00768549	0.0768549	ns
GELS_HUMAN	219days	790days	0.57735	0.563703	1	ns
GELS_HUMAN	219days	834days	0.23094	0.817361	1	ns
GELS_HUMAN	219days	872days	-0.23094	0.817361	1	ns
GELS_HUMAN	790days	834days	-0.34641	0.729034	1	ns
GELS_HUMAN	790days	872days	-0.80829	0.418923	1	ns
GELS_HUMAN	834days	872days	-0.46188	0.644167	1	ns
NPM_HUMAN	2-10days	219days	-2.00832	0.0446097	0.446097	ns
NPM_HUMAN	2-10days	790days	0.255604	0.798257	1	ns
NPM_HUMAN	2-10days	834days	-0.328634	0.742433	1	ns
NPM_HUMAN	2-10days	872days	-2.00832	0.0446097	0.446097	ns
NPM_HUMAN	219days	790days	1.78979	0.0734883	0.587907	ns
NPM_HUMAN	219days	834days	1.32791	0.184209	1	ns
NPM_HUMAN	219days	872days	0	1	1	ns
NPM_HUMAN	790days	834days	-0.46188	0.644167	1	ns
NPM_HUMAN	790days	872days	-1.78979	0.0734883	0.587907	ns
NPM_HUMAN	834days	872days	-1.32791	0.184209	1	ns
FMOD_HUMAN	2-10days	219days	0.310376	0.756275	1	ns
FMOD_HUMAN	2-10days	790days	1.55188	0.120691	0.741782	ns
FMOD_HUMAN	2-10days	834days	-2.02657	0.0427061	0.384354	ns
FMOD_HUMAN	2-10days	872days	0.0182574	0.985433	1	ns
FMOD_HUMAN	219days	790days	0.981495	0.326348	1	ns
FMOD_HUMAN	219days	834days	-1.84752	0.0646717	0.517374	ns
FMOD_HUMAN	219days	872days	-0.23094	0.817361	1	ns
FMOD_HUMAN	790days	834days	-2.82902	0.00466913	0.0466913	*
FMOD_HUMAN	790days	872days	-1.21244	0.225346	1	ns
FMOD_HUMAN	834days	872days	1.61658	0.105969	0.741782	ns
K2C8_HUMAN	2-10days	219days	-0.219089	0.826581	1	ns
K2C8_HUMAN	2-10days	790days	1.31453	0.188667	1	ns
K2C8_HUMAN	2-10days	834days	1.02242	0.306584	1	ns
K2C8_HUMAN	2-10days	872days	1.09545	0.273322	1	ns
K2C8_HUMAN	219days	790days	1.21244	0.225346	1	ns
K2C8_HUMAN	219days	834days	0.981495	0.326348	1	ns
K2C8_HUMAN	219days	872days	1.03923	0.298698	1	ns
K2C8_HUMAN	790days	834days	-0.23094	0.817361	1	ns
K2C8_HUMAN	790days	872days	-0.173205	0.86249	1	ns
K2C8_HUMAN	834days	872days	0.057735	0.95396	1	ns
PTX3_HUMAN	2-10days	219days	-1.89877	0.0575945	0.518351	ns
PTX3_HUMAN	2-10days	790days	-2.40998	0.0159534	0.159534	ns
PTX3_HUMAN	2-10days	834days	-1.09545	0.273322	1	ns
PTX3_HUMAN	2-10days	872days	-0.730297	0.465209	1	ns
PTX3_HUMAN	219days	790days	-0.404145	0.686106	1	ns
PTX3_HUMAN	219days	834days	0.635085	0.525373	1	ns
PTX3_HUMAN	219days	872days	0.92376	0.355611	1	ns
PTX3_HUMAN	790days	834days	1.03923	0.298698	1	ns
PTX3_HUMAN	790days	872days	1.32791	0.184209	1	ns
PTX3_HUMAN	834days	872days	0.288675	0.77283	1	ns
K2C1_HUMAN	2-10days	219days	0.63901	0.522817	1	ns
K2C1_HUMAN	2-10days	790days	1.15022	0.250054	1	ns
K2C1_HUMAN	2-10days	834days	-1.04067	0.298027	1	ns
K2C1_HUMAN	2-10days	872days	2.31869	0.0204117	0.183706	ns
K2C1_HUMAN	219days	790days	0.404145	0.686106	1	ns
K2C1_HUMAN	219days	834days	-1.32791	0.184209	1	ns
K2C1_HUMAN	219days	872days	1.32791	0.184209	1	ns
K2C1_HUMAN	790days	834days	-1.73205	0.0832645	0.666116	ns
K2C1_HUMAN	790days	872days	0.92376	0.355611	1	ns
K2C1_HUMAN	834days	872days	2.65581	0.00791179	0.0791179	ns
PGS2_HUMAN	2-10days	219days	-3.0855	0.00203208	0.0203208	*
PGS2_HUMAN	2-10days	790days	-1.33279	0.1826	1	ns
PGS2_HUMAN	2-10days	834days	-1.77097	0.0765658	0.689092	ns
PGS2_HUMAN	2-10days	872days	-1.25976	0.207755	1	ns
PGS2_HUMAN	219days	790days	1.38564	0.165857	1	ns
PGS2_HUMAN	219days	834days	1.03923	0.298698	1	ns
PGS2_HUMAN	219days	872days	1.44338	0.148915	1	ns
PGS2_HUMAN	790days	834days	-0.34641	0.729034	1	ns
PGS2_HUMAN	790days	872days	0.057735	0.95396	1	ns
PGS2_HUMAN	834days	872days	0.404145	0.686106	1	ns
A1BG_HUMAN	2-10days	219days	-2.48301	0.0130278	0.130278	ns
A1BG_HUMAN	2-10days	790days	-1.89877	0.0575945	0.518351	ns
A1BG_HUMAN	2-10days	834days	-1.89877	0.0575945	0.518351	ns
A1BG_HUMAN	2-10days	872days	-1.60665	0.108131	0.756914	ns
A1BG_HUMAN	219days	790days	0.46188	0.644167	1	ns
A1BG_HUMAN	219days	834days	0.46188	0.644167	1	ns
A1BG_HUMAN	219days	872days	0.69282	0.488422	1	ns
A1BG_HUMAN	790days	834days	0	1	1	ns
A1BG_HUMAN	790days	872days	0.23094	0.817361	1	ns
A1BG_HUMAN	834days	872days	0.23094	0.817361	1	ns
MIME_HUMAN	2-10days	219days	-0.219089	0.826581	1	ns
MIME_HUMAN	2-10days	790days	1.53362	0.125122	1	ns
MIME_HUMAN	2-10days	834days	-0.657267	0.511009	1	ns
MIME_HUMAN	2-10days	872days	0.803326	0.421786	1	ns
MIME_HUMAN	219days	790days	1.38564	0.165857	1	ns
MIME_HUMAN	219days	834days	-0.34641	0.729034	1	ns
MIME_HUMAN	219days	872days	0.80829	0.418923	1	ns
MIME_HUMAN	790days	834days	-1.73205	0.0832645	0.832645	ns
MIME_HUMAN	790days	872days	-0.57735	0.563703	1	ns
MIME_HUMAN	834days	872days	1.1547	0.248213	1	ns
ANT3_HUMAN	2-10days	219days	-0.310376	0.756275	1	ns
ANT3_HUMAN	2-10days	790days	1.95354	0.0507552	0.507552	ns
ANT3_HUMAN	2-10days	834days	0.0547723	0.95632	1	ns
ANT3_HUMAN	2-10days	872days	1.36931	0.170904	1	ns
ANT3_HUMAN	219days	790days	1.78979	0.0734883	0.661395	ns
ANT3_HUMAN	219days	834days	0.288675	0.77283	1	ns
ANT3_HUMAN	219days	872days	1.32791	0.184209	1	ns
ANT3_HUMAN	790days	834days	-1.50111	0.133327	1	ns
ANT3_HUMAN	790days	872days	-0.46188	0.644167	1	ns
ANT3_HUMAN	834days	872days	1.03923	0.298698	1	ns
COGA1_HUMAN	2-10days	219days	0	1	1	ns
COGA1_HUMAN	2-10days	790days	-1.46059	0.144127	1	ns
COGA1_HUMAN	2-10days	834days	-1.60665	0.108131	1	ns
COGA1_HUMAN	2-10days	872days	-0.730297	0.465209	1	ns
COGA1_HUMAN	219days	790days	-1.1547	0.248213	1	ns
COGA1_HUMAN	219days	834days	-1.27017	0.204024	1	ns
COGA1_HUMAN	219days	872days	-0.57735	0.563703	1	ns
COGA1_HUMAN	790days	834days	-0.11547	0.908073	1	ns
COGA1_HUMAN	790days	872days	0.57735	0.563703	1	ns
COGA1_HUMAN	834days	872days	0.69282	0.488422	1	ns
C1QC_HUMAN	2-10days	219days	-2.70269	0.00687818	0.0687818	ns
C1QC_HUMAN	2-10days	790days	-0.219137	0.826544	1	ns
C1QC_HUMAN	2-10days	834days	0.438273	0.661188	1	ns
C1QC_HUMAN	2-10days	872days	-0.730456	0.465112	1	ns
C1QC_HUMAN	219days	790days	1.96342	0.0495976	0.396781	ns
C1QC_HUMAN	219days	834days	2.48315	0.0130228	0.117205	ns
C1QC_HUMAN	219days	872days	1.55918	0.118953	0.832669	ns
C1QC_HUMAN	790days	834days	0.519728	0.603253	1	ns
C1QC_HUMAN	790days	872days	-0.404233	0.686041	1	ns
C1QC_HUMAN	834days	872days	-0.923961	0.355506	1	ns
VTNC_HUMAN	2-10days	219days	1.1137	0.265407	1	ns
VTNC_HUMAN	2-10days	790days	3.0855	0.00203208	0.0203208	*
VTNC_HUMAN	2-10days	834days	1.40582	0.159777	1	ns
VTNC_HUMAN	2-10days	872days	1.25976	0.207755	1	ns
VTNC_HUMAN	219days	790days	1.55885	0.119033	1	ns
VTNC_HUMAN	219days	834days	0.23094	0.817361	1	ns
VTNC_HUMAN	219days	872days	0.11547	0.908073	1	ns
VTNC_HUMAN	790days	834days	-1.32791	0.184209	1	ns
VTNC_HUMAN	790days	872days	-1.44338	0.148915	1	ns
VTNC_HUMAN	834days	872days	-0.11547	0.908073	1	ns
OSTCN_HUMAN	2-10days	219days	-3.34111	0.000834449	0.00834449	**
OSTCN_HUMAN	2-10days	790days	-1.88051	0.060038	0.420266	ns
OSTCN_HUMAN	2-10days	834days	-2.46475	0.0137108	0.123397	ns
OSTCN_HUMAN	2-10days	872days	-0.63901	0.522817	1	ns
OSTCN_HUMAN	219days	790days	1.1547	0.248213	1	ns
OSTCN_HUMAN	219days	834days	0.69282	0.488422	1	ns
OSTCN_HUMAN	219days	872days	2.1362	0.0326634	0.261308	ns
OSTCN_HUMAN	790days	834days	-0.46188	0.644167	1	ns
OSTCN_HUMAN	790days	872days	0.981495	0.326348	1	ns
OSTCN_HUMAN	834days	872days	1.44338	0.148915	0.893488	ns
LMNA_HUMAN	2-10days	219days	-2.40998	0.0159534	0.159534	ns
LMNA_HUMAN	2-10days	790days	-2.04483	0.0408715	0.326972	ns
LMNA_HUMAN	2-10days	834days	-2.26392	0.023579	0.212211	ns
LMNA_HUMAN	2-10days	872days	-1.75271	0.0796514	0.55756	ns
LMNA_HUMAN	219days	790days	0.288675	0.77283	1	ns
LMNA_HUMAN	219days	834days	0.11547	0.908073	1	ns
LMNA_HUMAN	219days	872days	0.519615	0.603332	1	ns
LMNA_HUMAN	790days	834days	-0.173205	0.86249	1	ns
LMNA_HUMAN	790days	872days	0.23094	0.817361	1	ns
LMNA_HUMAN	834days	872days	0.404145	0.686106	1	ns
PROC_HUMAN	2-10days	219days	1.44234	0.149208	1	ns
PROC_HUMAN	2-10days	790days	1.44234	0.149208	1	ns
PROC_HUMAN	2-10days	834days	1.36931	0.170904	1	ns
PROC_HUMAN	2-10days	872days	-0.0182574	0.985433	1	ns
PROC_HUMAN	219days	790days	0	1	1	ns
PROC_HUMAN	219days	834days	-0.057735	0.95396	1	ns
PROC_HUMAN	219days	872days	-1.1547	0.248213	1	ns
PROC_HUMAN	790days	834days	-0.057735	0.95396	1	ns
PROC_HUMAN	790days	872days	-1.1547	0.248213	1	ns
PROC_HUMAN	834days	872days	-1.09697	0.272656	1	ns
CHAD_HUMAN	2-10days	219days	1.62491	0.104182	0.729272	ns
CHAD_HUMAN	2-10days	790days	3.0855	0.00203208	0.0203208	*
CHAD_HUMAN	2-10days	834days	2.06309	0.0391042	0.312834	ns
CHAD_HUMAN	2-10days	872days	2.42824	0.0151724	0.136552	ns
CHAD_HUMAN	219days	790days	1.1547	0.248213	1	ns
CHAD_HUMAN	219days	834days	0.34641	0.729034	1	ns
CHAD_HUMAN	219days	872days	0.635085	0.525373	1	ns
CHAD_HUMAN	790days	834days	-0.80829	0.418923	1	ns
CHAD_HUMAN	790days	872days	-0.519615	0.603332	1	ns
CHAD_HUMAN	834days	872days	0.288675	0.77283	1	ns
FIBA_HUMAN	2-10days	219days	-1.67968	0.0930191	0.930191	ns
FIBA_HUMAN	2-10days	790days	-0.876356	0.380836	1	ns
FIBA_HUMAN	2-10days	834days	-0.730297	0.465209	1	ns
FIBA_HUMAN	2-10days	872days	-0.511208	0.609206	1	ns
FIBA_HUMAN	219days	790days	0.635085	0.525373	1	ns
FIBA_HUMAN	219days	834days	0.750555	0.45292	1	ns
FIBA_HUMAN	219days	872days	0.92376	0.355611	1	ns
FIBA_HUMAN	790days	834days	0.11547	0.908073	1	ns
FIBA_HUMAN	790days	872days	0.288675	0.77283	1	ns
FIBA_HUMAN	834days	872days	0.173205	0.86249	1	ns
CILP1_HUMAN	2-10days	219days	1.18673	0.235333	1	ns
CILP1_HUMAN	2-10days	790days	-0.127802	0.898306	1	ns
CILP1_HUMAN	2-10days	834days	0.164317	0.869482	1	ns
CILP1_HUMAN	2-10days	872days	0.383406	0.701419	1	ns
CILP1_HUMAN	219days	790days	-1.03923	0.298698	1	ns
CILP1_HUMAN	219days	834days	-0.80829	0.418923	1	ns
CILP1_HUMAN	219days	872days	-0.635085	0.525373	1	ns
CILP1_HUMAN	790days	834days	0.23094	0.817361	1	ns
CILP1_HUMAN	790days	872days	0.404145	0.686106	1	ns
CILP1_HUMAN	834days	872days	0.173205	0.86249	1	ns
PRDX2_HUMAN	2-10days	219days	-1.44234	0.149208	0.895246	ns
PRDX2_HUMAN	2-10days	790days	1.55188	0.120691	0.844836	ns
PRDX2_HUMAN	2-10days	834days	1.91703	0.0552343	0.441874	ns
PRDX2_HUMAN	2-10days	872days	0.164317	0.869482	1	ns
PRDX2_HUMAN	219days	790days	2.36714	0.0179263	0.161337	ns
PRDX2_HUMAN	219days	834days	2.65581	0.00791179	0.0791179	ns
PRDX2_HUMAN	219days	872days	1.27017	0.204024	0.895246	ns
PRDX2_HUMAN	790days	834days	0.288675	0.77283	1	ns
PRDX2_HUMAN	790days	872days	-1.09697	0.272656	0.895246	ns
PRDX2_HUMAN	834days	872days	-1.38564	0.165857	0.895246	ns
PGS1_HUMAN	2-10days	219days	-0.876356	0.380836	1	ns
PGS1_HUMAN	2-10days	790days	0	1	1	ns
PGS1_HUMAN	2-10days	834days	-0.219089	0.826581	1	ns
PGS1_HUMAN	2-10days	872days	1.38756	0.16527	1	ns
PGS1_HUMAN	219days	790days	0.69282	0.488422	1	ns
PGS1_HUMAN	219days	834days	0.519615	0.603332	1	ns
PGS1_HUMAN	219days	872days	1.78979	0.0734883	0.734883	ns
PGS1_HUMAN	790days	834days	-0.173205	0.86249	1	ns
PGS1_HUMAN	790days	872days	1.09697	0.272656	1	ns
PGS1_HUMAN	834days	872days	1.27017	0.204024	1	ns
TETN_HUMAN	2-10days	219days	-0.0912871	0.927264	1	ns
TETN_HUMAN	2-10days	790days	1.51537	0.12968	1	ns
TETN_HUMAN	2-10days	834days	1.36931	0.170904	1	ns
TETN_HUMAN	2-10days	872days	0.858099	0.390838	1	ns
TETN_HUMAN	219days	790days	1.27017	0.204024	1	ns
TETN_HUMAN	219days	834days	1.1547	0.248213	1	ns
TETN_HUMAN	219days	872days	0.750555	0.45292	1	ns
TETN_HUMAN	790days	834days	-0.11547	0.908073	1	ns
TETN_HUMAN	790days	872days	-0.519615	0.603332	1	ns
TETN_HUMAN	834days	872days	-0.404145	0.686106	1	ns
H4_HUMAN	2-10days	219days	-2.30043	0.0214236	0.149965	ns
H4_HUMAN	2-10days	790days	-2.59255	0.00952664	0.0857397	ns
H4_HUMAN	2-10days	834days	-3.10376	0.00191078	0.0191078	*
H4_HUMAN	2-10days	872days	-2.51952	0.0117514	0.094011	ns
H4_HUMAN	219days	790days	-0.23094	0.817361	1	ns
H4_HUMAN	219days	834days	-0.635085	0.525373	1	ns
H4_HUMAN	219days	872days	-0.173205	0.86249	1	ns
H4_HUMAN	790days	834days	-0.404145	0.686106	1	ns
H4_HUMAN	790days	872days	0.057735	0.95396	1	ns
H4_HUMAN	834days	872days	0.46188	0.644167	1	ns
SODE_HUMAN	2-10days	219days	1.51537	0.12968	0.907759	ns
SODE_HUMAN	2-10days	790days	-0.0182574	0.985433	1	ns
SODE_HUMAN	2-10days	834days	-2.20915	0.0271644	0.244479	ns
SODE_HUMAN	2-10days	872days	-0.310376	0.756275	1	ns
SODE_HUMAN	219days	790days	-1.21244	0.225346	0.907759	ns
SODE_HUMAN	219days	834days	-2.94449	0.00323491	0.0323491	*
SODE_HUMAN	219days	872days	-1.44338	0.148915	0.907759	ns
SODE_HUMAN	790days	834days	-1.73205	0.0832645	0.666116	ns
SODE_HUMAN	790days	872days	-0.23094	0.817361	1	ns
SODE_HUMAN	834days	872days	1.50111	0.133327	0.907759	ns
PCOC1_HUMAN	2-10days	219days	0.219089	0.826581	1	ns
PCOC1_HUMAN	2-10days	790days	1.46059	0.144127	1	ns
PCOC1_HUMAN	2-10days	834days	0.365148	0.715001	1	ns
PCOC1_HUMAN	2-10days	872days	1.75271	0.0796514	0.796514	ns
PCOC1_HUMAN	219days	790days	0.981495	0.326348	1	ns
PCOC1_HUMAN	219days	834days	0.11547	0.908073	1	ns
PCOC1_HUMAN	219days	872days	1.21244	0.225346	1	ns
PCOC1_HUMAN	790days	834days	-0.866025	0.386476	1	ns
PCOC1_HUMAN	790days	872days	0.23094	0.817361	1	ns
PCOC1_HUMAN	834days	872days	1.09697	0.272656	1	ns
PEDF_HUMAN	2-10days	219days	0.56598	0.571407	1	ns
PEDF_HUMAN	2-10days	790days	2.17263	0.029808	0.268272	ns
PEDF_HUMAN	2-10days	834days	1.00416	0.315302	1	ns
PEDF_HUMAN	2-10days	872days	2.24566	0.0247256	0.247256	ns
PEDF_HUMAN	219days	790days	1.27017	0.204024	1	ns
PEDF_HUMAN	219days	834days	0.34641	0.729034	1	ns
PEDF_HUMAN	219days	872days	1.32791	0.184209	1	ns
PEDF_HUMAN	790days	834days	-0.92376	0.355611	1	ns
PEDF_HUMAN	790days	872days	0.057735	0.95396	1	ns
PEDF_HUMAN	834days	872days	0.981495	0.326348	1	ns
CO8A2_HUMAN	2-10days	219days	0.292119	0.770196	1	ns
CO8A2_HUMAN	2-10days	790days	-1.9718	0.0486323	0.340426	ns
CO8A2_HUMAN	2-10days	834days	2.33695	0.0194418	0.174976	ns
CO8A2_HUMAN	2-10days	872days	-0.365148	0.715001	1	ns
CO8A2_HUMAN	219days	790days	-1.78979	0.0734883	0.44093	ns
CO8A2_HUMAN	219days	834days	1.61658	0.105969	0.529844	ns
CO8A2_HUMAN	219days	872days	-0.519615	0.603332	1	ns
CO8A2_HUMAN	790days	834days	3.40637	0.000658337	0.00658337	**
CO8A2_HUMAN	790days	872days	1.27017	0.204024	0.816095	ns
CO8A2_HUMAN	834days	872days	-2.1362	0.0326634	0.261308	ns
CO6A2_HUMAN	2-10days	219days	-2.04483	0.0408715	0.408715	ns
CO6A2_HUMAN	2-10days	790days	-1.31453	0.188667	1	ns
CO6A2_HUMAN	2-10days	834days	-0.219089	0.826581	1	ns
CO6A2_HUMAN	2-10days	872days	-0.803326	0.421786	1	ns
CO6A2_HUMAN	219days	790days	0.57735	0.563703	1	ns
CO6A2_HUMAN	219days	834days	1.44338	0.148915	1	ns
CO6A2_HUMAN	219days	872days	0.981495	0.326348	1	ns
CO6A2_HUMAN	790days	834days	0.866025	0.386476	1	ns
CO6A2_HUMAN	790days	872days	0.404145	0.686106	1	ns
CO6A2_HUMAN	834days	872days	-0.46188	0.644167	1	ns
CRP_HUMAN	2-10days	219days	-0.958723	0.337698	1	ns
CRP_HUMAN	2-10days	790days	-0.776109	0.437685	1	ns
CRP_HUMAN	2-10days	834days	-0.155222	0.876646	1	ns
CRP_HUMAN	2-10days	872days	0.940462	0.346981	1	ns
CRP_HUMAN	219days	790days	0.144369	0.885209	1	ns
CRP_HUMAN	219days	834days	0.635223	0.525283	1	ns
CRP_HUMAN	219days	872days	1.50144	0.133243	1	ns
CRP_HUMAN	790days	834days	0.490854	0.623529	1	ns
CRP_HUMAN	790days	872days	1.35707	0.17476	1	ns
CRP_HUMAN	834days	872days	0.866214	0.386373	1	ns
CO4A_HUMAN	2-10days	219days	-1.44234	0.149208	1	ns
CO4A_HUMAN	2-10days	790days	0.456435	0.648077	1	ns
CO4A_HUMAN	2-10days	834days	-0.858099	0.390838	1	ns
CO4A_HUMAN	2-10days	872days	-0.63901	0.522817	1	ns
CO4A_HUMAN	219days	790days	1.50111	0.133327	1	ns
CO4A_HUMAN	219days	834days	0.46188	0.644167	1	ns
CO4A_HUMAN	219days	872days	0.635085	0.525373	1	ns
CO4A_HUMAN	790days	834days	-1.03923	0.298698	1	ns
CO4A_HUMAN	790days	872days	-0.866025	0.386476	1	ns
CO4A_HUMAN	834days	872days	0.173205	0.86249	1	ns
COCA1_HUMAN	2-10days	219days	1.51537	0.12968	1	ns
COCA1_HUMAN	2-10days	790days	0.0547723	0.95632	1	ns
COCA1_HUMAN	2-10days	834days	-0.894614	0.370994	1	ns
COCA1_HUMAN	2-10days	872days	1.22325	0.221236	1	ns
COCA1_HUMAN	219days	790days	-1.1547	0.248213	1	ns
COCA1_HUMAN	219days	834days	-1.90526	0.0567468	0.567468	ns
COCA1_HUMAN	219days	872days	-0.23094	0.817361	1	ns
COCA1_HUMAN	790days	834days	-0.750555	0.45292	1	ns
COCA1_HUMAN	790days	872days	0.92376	0.355611	1	ns
COCA1_HUMAN	834days	872days	1.67432	0.0940686	0.846617	ns
EMIL1_HUMAN	2-10days	219days	1.93529	0.0529552	0.476596	ns
EMIL1_HUMAN	2-10days	790days	0.912871	0.36131	1	ns
EMIL1_HUMAN	2-10days	834days	-0.985901	0.324182	1	ns
EMIL1_HUMAN	2-10days	872days	1.05893	0.289632	1	ns
EMIL1_HUMAN	219days	790days	-0.80829	0.418923	1	ns
EMIL1_HUMAN	219days	834days	-2.3094	0.0209213	0.209213	ns
EMIL1_HUMAN	219days	872days	-0.69282	0.488422	1	ns
EMIL1_HUMAN	790days	834days	-1.50111	0.133327	0.933289	ns
EMIL1_HUMAN	790days	872days	0.11547	0.908073	1	ns
EMIL1_HUMAN	834days	872days	1.61658	0.105969	0.84775	ns
IBP3_HUMAN	2-10days	219days	1.82574	0.0678892	0.611002	ns
IBP3_HUMAN	2-10days	790days	-1.09545	0.273322	1	ns
IBP3_HUMAN	2-10days	834days	0.511208	0.609206	1	ns
IBP3_HUMAN	2-10days	872days	-0.365148	0.715001	1	ns
IBP3_HUMAN	219days	790days	-2.3094	0.0209213	0.209213	ns
IBP3_HUMAN	219days	834days	-1.03923	0.298698	1	ns
IBP3_HUMAN	219days	872days	-1.73205	0.0832645	0.666116	ns
IBP3_HUMAN	790days	834days	1.27017	0.204024	1	ns
IBP3_HUMAN	790days	872days	0.57735	0.563703	1	ns
IBP3_HUMAN	834days	872days	-0.69282	0.488422	1	ns
APOA1_HUMAN	2-10days	219days	0	1	1	ns
APOA1_HUMAN	2-10days	790days	-0.292119	0.770196	1	ns
APOA1_HUMAN	2-10days	834days	-0.146059	0.883875	1	ns
APOA1_HUMAN	2-10days	872days	1.31453	0.188667	1	ns
APOA1_HUMAN	219days	790days	-0.23094	0.817361	1	ns
APOA1_HUMAN	219days	834days	-0.11547	0.908073	1	ns
APOA1_HUMAN	219days	872days	1.03923	0.298698	1	ns
APOA1_HUMAN	790days	834days	0.11547	0.908073	1	ns
APOA1_HUMAN	790days	872days	1.27017	0.204024	1	ns
APOA1_HUMAN	834days	872days	1.1547	0.248213	1	ns
K1C18_HUMAN	2-10days	219days	-1.29628	0.19488	1	ns
K1C18_HUMAN	2-10days	790days	-0.419921	0.674543	1	ns
K1C18_HUMAN	2-10days	834days	-1.95354	0.0507552	0.507552	ns
K1C18_HUMAN	2-10days	872days	-1.15022	0.250054	1	ns
K1C18_HUMAN	219days	790days	0.69282	0.488422	1	ns
K1C18_HUMAN	219days	834days	-0.519615	0.603332	1	ns
K1C18_HUMAN	219days	872days	0.11547	0.908073	1	ns
K1C18_HUMAN	790days	834days	-1.21244	0.225346	1	ns
K1C18_HUMAN	790days	872days	-0.57735	0.563703	1	ns
K1C18_HUMAN	834days	872days	0.635085	0.525373	1	ns
TPM4_HUMAN	2-10days	219days	-3.0855	0.00203208	0.0203208	*
TPM4_HUMAN	2-10days	790days	-2.79339	0.00521596	0.0469436	*
TPM4_HUMAN	2-10days	834days	-1.77097	0.0765658	0.53596	ns
TPM4_HUMAN	2-10days	872days	-2.13612	0.0326698	0.261358	ns
TPM4_HUMAN	219days	790days	0.23094	0.817361	1	ns
TPM4_HUMAN	219days	834days	1.03923	0.298698	1	ns
TPM4_HUMAN	219days	872days	0.750555	0.45292	1	ns
TPM4_HUMAN	790days	834days	0.80829	0.418923	1	ns
TPM4_HUMAN	790days	872days	0.519615	0.603332	1	ns
TPM4_HUMAN	834days	872days	-0.288675	0.77283	1	ns
CAH1_HUMAN	2-10days	219days	-1.49711	0.134365	1	ns
CAH1_HUMAN	2-10days	790days	-0.620752	0.534763	1	ns
CAH1_HUMAN	2-10days	834days	0.693782	0.487819	1	ns
CAH1_HUMAN	2-10days	872days	0.255604	0.798257	1	ns
CAH1_HUMAN	219days	790days	0.69282	0.488422	1	ns
CAH1_HUMAN	219days	834days	1.73205	0.0832645	0.832645	ns
CAH1_HUMAN	219days	872days	1.38564	0.165857	1	ns
CAH1_HUMAN	790days	834days	1.03923	0.298698	1	ns
CAH1_HUMAN	790days	872days	0.69282	0.488422	1	ns
CAH1_HUMAN	834days	872days	-0.34641	0.729034	1	ns
COBA2_HUMAN	2-10days	219days	1.38756	0.16527	1	ns
COBA2_HUMAN	2-10days	790days	1.31453	0.188667	1	ns
COBA2_HUMAN	2-10days	834days	-0.657267	0.511009	1	ns
COBA2_HUMAN	2-10days	872days	0.584237	0.559061	1	ns
COBA2_HUMAN	219days	790days	-0.057735	0.95396	1	ns
COBA2_HUMAN	219days	834days	-1.61658	0.105969	1	ns
COBA2_HUMAN	219days	872days	-0.635085	0.525373	1	ns
COBA2_HUMAN	790days	834days	-1.55885	0.119033	1	ns
COBA2_HUMAN	790days	872days	-0.57735	0.563703	1	ns
COBA2_HUMAN	834days	872days	0.981495	0.326348	1	ns
FA9_HUMAN	2-10days	219days	1.89877	0.0575945	0.518351	ns
FA9_HUMAN	2-10days	790days	1.60665	0.108131	0.865044	ns
FA9_HUMAN	2-10days	834days	1.02242	0.306584	1	ns
FA9_HUMAN	2-10days	872days	2.19089	0.0284597	0.284597	ns
FA9_HUMAN	219days	790days	-0.23094	0.817361	1	ns
FA9_HUMAN	219days	834days	-0.69282	0.488422	1	ns
FA9_HUMAN	219days	872days	0.23094	0.817361	1	ns
FA9_HUMAN	790days	834days	-0.46188	0.644167	1	ns
FA9_HUMAN	790days	872days	0.46188	0.644167	1	ns
FA9_HUMAN	834days	872days	0.92376	0.355611	1	ns
PGAM2_HUMAN	2-10days	219days	1.49711	0.134365	0.940556	ns
PGAM2_HUMAN	2-10days	790days	-0.766812	0.443194	1	ns
PGAM2_HUMAN	2-10days	834days	1.35105	0.17668	0.940556	ns
PGAM2_HUMAN	2-10days	872days	1.42408	0.154424	0.940556	ns
PGAM2_HUMAN	219days	790days	-1.78979	0.0734883	0.734883	ns
PGAM2_HUMAN	219days	834days	-0.11547	0.908073	1	ns
PGAM2_HUMAN	219days	872days	-0.057735	0.95396	1	ns
PGAM2_HUMAN	790days	834days	1.67432	0.0940686	0.752548	ns
PGAM2_HUMAN	790days	872days	1.73205	0.0832645	0.749381	ns
PGAM2_HUMAN	834days	872days	0.057735	0.95396	1	ns
FA10_HUMAN	2-10days	219days	0.967643	0.333223	1	ns
FA10_HUMAN	2-10days	790days	0.237346	0.812388	1	ns
FA10_HUMAN	2-10days	834days	0.821584	0.411314	1	ns
FA10_HUMAN	2-10days	872days	-0.419921	0.674543	1	ns
FA10_HUMAN	219days	790days	-0.57735	0.563703	1	ns
FA10_HUMAN	219days	834days	-0.11547	0.908073	1	ns
FA10_HUMAN	219days	872days	-1.09697	0.272656	1	ns
FA10_HUMAN	790days	834days	0.46188	0.644167	1	ns
FA10_HUMAN	790days	872days	-0.519615	0.603332	1	ns
FA10_HUMAN	834days	872days	-0.981495	0.326348	1	ns
FA7_HUMAN	2-10days	219days	2.7021	0.00689035	0.0689035	ns
FA7_HUMAN	2-10days	790days	1.9718	0.0486323	0.437691	ns
FA7_HUMAN	2-10days	834days	0.730297	0.465209	1	ns
FA7_HUMAN	2-10days	872days	1.89877	0.0575945	0.460756	ns
FA7_HUMAN	219days	790days	-0.57735	0.563703	1	ns
FA7_HUMAN	219days	834days	-1.55885	0.119033	0.83323	ns
FA7_HUMAN	219days	872days	-0.635085	0.525373	1	ns
FA7_HUMAN	790days	834days	-0.981495	0.326348	1	ns
FA7_HUMAN	790days	872days	-0.057735	0.95396	1	ns
FA7_HUMAN	834days	872days	0.92376	0.355611	1	ns
APOC1_HUMAN	2-10days	219days	-0.547723	0.583882	1	ns
APOC1_HUMAN	2-10days	790days	1.42408	0.154424	1	ns
APOC1_HUMAN	2-10days	834days	0.401663	0.687932	1	ns
APOC1_HUMAN	2-10days	872days	-0.693782	0.487819	1	ns
APOC1_HUMAN	219days	790days	1.55885	0.119033	1	ns
APOC1_HUMAN	219days	834days	0.750555	0.45292	1	ns
APOC1_HUMAN	219days	872days	-0.11547	0.908073	1	ns
APOC1_HUMAN	790days	834days	-0.80829	0.418923	1	ns
APOC1_HUMAN	790days	872days	-1.67432	0.0940686	0.940686	ns
APOC1_HUMAN	834days	872days	-0.866025	0.386476	1	ns
IC1_HUMAN	2-10days	219days	-1.32029	0.186739	1	ns
IC1_HUMAN	2-10days	790days	-1.02689	0.304472	1	ns
IC1_HUMAN	2-10days	834days	0.586794	0.557342	1	ns
IC1_HUMAN	2-10days	872days	2.05378	0.039997	0.319976	ns
IC1_HUMAN	219days	790days	0.231951	0.816576	1	ns
IC1_HUMAN	219days	834days	1.50768	0.131636	0.921455	ns
IC1_HUMAN	219days	872days	2.66743	0.00764329	0.0764329	ns
IC1_HUMAN	790days	834days	1.27573	0.202051	1	ns
IC1_HUMAN	790days	872days	2.43548	0.0148719	0.133847	ns
IC1_HUMAN	834days	872days	1.15975	0.246149	1	ns
RLA2_HUMAN	2-10days	219days	-1.7162	0.0861259	0.735783	ns
RLA2_HUMAN	2-10days	790days	-1.78923	0.0735783	0.735783	ns
RLA2_HUMAN	2-10days	834days	-1.78923	0.0735783	0.735783	ns
RLA2_HUMAN	2-10days	872days	0.0365148	0.970872	1	ns
RLA2_HUMAN	219days	790days	-0.057735	0.95396	1	ns
RLA2_HUMAN	219days	834days	-0.057735	0.95396	1	ns
RLA2_HUMAN	219days	872days	1.38564	0.165857	1	ns
RLA2_HUMAN	790days	834days	0	1	1	ns
RLA2_HUMAN	790days	872days	1.44338	0.148915	1	ns
RLA2_HUMAN	834days	872days	1.44338	0.148915	1	ns
LUM_HUMAN	2-10days	219days	0.912871	0.36131	1	ns
LUM_HUMAN	2-10days	790days	2.08135	0.0374023	0.374023	ns
LUM_HUMAN	2-10days	834days	1.13196	0.257651	1	ns
LUM_HUMAN	2-10days	872days	1.7162	0.0861259	0.775133	ns
LUM_HUMAN	219days	790days	0.92376	0.355611	1	ns
LUM_HUMAN	219days	834days	0.173205	0.86249	1	ns
LUM_HUMAN	219days	872days	0.635085	0.525373	1	ns
LUM_HUMAN	790days	834days	-0.750555	0.45292	1	ns
LUM_HUMAN	790days	872days	-0.288675	0.77283	1	ns
LUM_HUMAN	834days	872days	0.46188	0.644167	1	ns
KNG1_HUMAN	2-10days	219days	-1.55188	0.120691	1	ns
KNG1_HUMAN	2-10days	790days	0.0547723	0.95632	1	ns
KNG1_HUMAN	2-10days	834days	-0.310376	0.756275	1	ns
KNG1_HUMAN	2-10days	872days	-0.967643	0.333223	1	ns
KNG1_HUMAN	219days	790days	1.27017	0.204024	1	ns
KNG1_HUMAN	219days	834days	0.981495	0.326348	1	ns
KNG1_HUMAN	219days	872days	0.46188	0.644167	1	ns
KNG1_HUMAN	790days	834days	-0.288675	0.77283	1	ns
KNG1_HUMAN	790days	872days	-0.80829	0.418923	1	ns
KNG1_HUMAN	834days	872days	-0.519615	0.603332	1	ns
A2GL_HUMAN	2-10days	219days	0.374358	0.708138	1	ns
A2GL_HUMAN	2-10days	790days	0.26479	0.791171	1	ns
A2GL_HUMAN	2-10days	834days	0.995246	0.319617	1	ns
A2GL_HUMAN	2-10days	872days	0.191745	0.847942	1	ns
A2GL_HUMAN	219days	790days	-0.0866214	0.930972	1	ns
A2GL_HUMAN	219days	834days	0.490854	0.623529	1	ns
A2GL_HUMAN	219days	872days	-0.144369	0.885209	1	ns
A2GL_HUMAN	790days	834days	0.577476	0.563618	1	ns
A2GL_HUMAN	790days	872days	-0.0577476	0.95395	1	ns
A2GL_HUMAN	834days	872days	-0.635223	0.525283	1	ns
ILEU_HUMAN	2-10days	219days	-0.201006	0.840694	1	ns
ILEU_HUMAN	2-10days	790days	-0.0548199	0.956282	1	ns
ILEU_HUMAN	2-10days	834days	-0.0548199	0.956282	1	ns
ILEU_HUMAN	2-10days	872days	1.9187	0.0550226	0.550226	ns
ILEU_HUMAN	219days	790days	0.115571	0.907993	1	ns
ILEU_HUMAN	219days	834days	0.115571	0.907993	1	ns
ILEU_HUMAN	219days	872days	1.67577	0.0937825	0.844043	ns
ILEU_HUMAN	790days	834days	0	1	1	ns
ILEU_HUMAN	790days	872days	1.5602	0.118712	0.949695	ns
ILEU_HUMAN	834days	872days	1.5602	0.118712	0.949695	ns
CSPG2_HUMAN	2-10days	219days	-0.474693	0.635006	1	ns
CSPG2_HUMAN	2-10days	790days	-1.86226	0.0625669	0.563102	ns
CSPG2_HUMAN	2-10days	834days	-2.66558	0.00768549	0.0768549	ns
CSPG2_HUMAN	2-10days	872days	-1.42408	0.154424	1	ns
CSPG2_HUMAN	219days	790days	-1.09697	0.272656	1	ns
CSPG2_HUMAN	219days	834days	-1.73205	0.0832645	0.666116	ns
CSPG2_HUMAN	219days	872days	-0.750555	0.45292	1	ns
CSPG2_HUMAN	790days	834days	-0.635085	0.525373	1	ns
CSPG2_HUMAN	790days	872days	0.34641	0.729034	1	ns
CSPG2_HUMAN	834days	872days	0.981495	0.326348	1	ns
MYH7_HUMAN	2-10days	219days	-0.49295	0.622048	1	ns
MYH7_HUMAN	2-10days	790days	-0.712039	0.47644	1	ns
MYH7_HUMAN	2-10days	834days	-1.73445	0.0828374	0.828374	ns
MYH7_HUMAN	2-10days	872days	-0.712039	0.47644	1	ns
MYH7_HUMAN	219days	790days	-0.173205	0.86249	1	ns
MYH7_HUMAN	219days	834days	-0.981495	0.326348	1	ns
MYH7_HUMAN	219days	872days	-0.173205	0.86249	1	ns
MYH7_HUMAN	790days	834days	-0.80829	0.418923	1	ns
MYH7_HUMAN	790days	872days	0	1	1	ns
MYH7_HUMAN	834days	872days	0.80829	0.418923	1	ns
SPRC_HUMAN	2-10days	219days	-0.675524	0.499343	1	ns
SPRC_HUMAN	2-10days	790days	1.5884	0.112197	1	ns
SPRC_HUMAN	2-10days	834days	-0.0912871	0.927264	1	ns
SPRC_HUMAN	2-10days	872days	1.07719	0.281396	1	ns
SPRC_HUMAN	219days	790days	1.78979	0.0734883	0.734883	ns
SPRC_HUMAN	219days	834days	0.46188	0.644167	1	ns
SPRC_HUMAN	219days	872days	1.38564	0.165857	1	ns
SPRC_HUMAN	790days	834days	-1.32791	0.184209	1	ns
SPRC_HUMAN	790days	872days	-0.404145	0.686106	1	ns
SPRC_HUMAN	834days	872days	0.92376	0.355611	1	ns
DERM_HUMAN	2-10days	219days	1.62491	0.104182	0.937635	ns
DERM_HUMAN	2-10days	790days	1.47885	0.13918	1	ns
DERM_HUMAN	2-10days	834days	0.821584	0.411314	1	ns
DERM_HUMAN	2-10days	872days	1.77097	0.0765658	0.765658	ns
DERM_HUMAN	219days	790days	-0.11547	0.908073	1	ns
DERM_HUMAN	219days	834days	-0.635085	0.525373	1	ns
DERM_HUMAN	219days	872days	0.11547	0.908073	1	ns
DERM_HUMAN	790days	834days	-0.519615	0.603332	1	ns
DERM_HUMAN	790days	872days	0.23094	0.817361	1	ns
DERM_HUMAN	834days	872days	0.750555	0.45292	1	ns
FETUA_HUMAN	2-10days	219days	0.146059	0.883875	1	ns
FETUA_HUMAN	2-10days	790days	1.46059	0.144127	1	ns
FETUA_HUMAN	2-10days	834days	0.365148	0.715001	1	ns
FETUA_HUMAN	2-10days	872days	1.82574	0.0678892	0.678892	ns
FETUA_HUMAN	219days	790days	1.03923	0.298698	1	ns
FETUA_HUMAN	219days	834days	0.173205	0.86249	1	ns
FETUA_HUMAN	219days	872days	1.32791	0.184209	1	ns
FETUA_HUMAN	790days	834days	-0.866025	0.386476	1	ns
FETUA_HUMAN	790days	872days	0.288675	0.77283	1	ns
FETUA_HUMAN	834days	872days	1.1547	0.248213	1	ns
ACTN1_HUMAN	2-10days	219days	0.511208	0.609206	1	ns
ACTN1_HUMAN	2-10days	790days	-0.949386	0.342424	1	ns
ACTN1_HUMAN	2-10days	834days	0	1	1	ns
ACTN1_HUMAN	2-10days	872days	1.31453	0.188667	1	ns
ACTN1_HUMAN	219days	790days	-1.1547	0.248213	1	ns
ACTN1_HUMAN	219days	834days	-0.404145	0.686106	1	ns
ACTN1_HUMAN	219days	872days	0.635085	0.525373	1	ns
ACTN1_HUMAN	790days	834days	0.750555	0.45292	1	ns
ACTN1_HUMAN	790days	872days	1.78979	0.0734883	0.734883	ns
ACTN1_HUMAN	834days	872days	1.03923	0.298698	1	ns
VTDB_HUMAN	2-10days	219days	-1.69794	0.0895191	0.805672	ns
VTDB_HUMAN	2-10days	790days	-1.18673	0.235333	1	ns
VTDB_HUMAN	2-10days	834days	0.56598	0.571407	1	ns
VTDB_HUMAN	2-10days	872days	0.127802	0.898306	1	ns
VTDB_HUMAN	219days	790days	0.404145	0.686106	1	ns
VTDB_HUMAN	219days	834days	1.78979	0.0734883	0.734883	ns
VTDB_HUMAN	219days	872days	1.44338	0.148915	1	ns
VTDB_HUMAN	790days	834days	1.38564	0.165857	1	ns
VTDB_HUMAN	790days	872days	1.03923	0.298698	1	ns
VTDB_HUMAN	834days	872days	-0.34641	0.729034	1	ns
OMD_HUMAN	2-10days	219days	0.748554	0.454126	1	ns
OMD_HUMAN	2-10days	790days	1.55188	0.120691	1	ns
OMD_HUMAN	2-10days	834days	0.529465	0.596483	1	ns
OMD_HUMAN	2-10days	872days	1.69794	0.0895191	0.895191	ns
OMD_HUMAN	219days	790days	0.635085	0.525373	1	ns
OMD_HUMAN	219days	834days	-0.173205	0.86249	1	ns
OMD_HUMAN	219days	872days	0.750555	0.45292	1	ns
OMD_HUMAN	790days	834days	-0.80829	0.418923	1	ns
OMD_HUMAN	790days	872days	0.11547	0.908073	1	ns
OMD_HUMAN	834days	872days	0.92376	0.355611	1	ns
CO2A1_HUMAN	2-10days	219days	1.47885	0.13918	0.695901	ns
CO2A1_HUMAN	2-10days	790days	1.33279	0.1826	0.730401	ns
CO2A1_HUMAN	2-10days	834days	-1.15022	0.250054	0.750163	ns
CO2A1_HUMAN	2-10days	872days	-1.80748	0.0706868	0.424121	ns
CO2A1_HUMAN	219days	790days	-0.11547	0.908073	1	ns
CO2A1_HUMAN	219days	834days	-2.07846	0.0376669	0.301335	ns
CO2A1_HUMAN	219days	872days	-2.59808	0.00937477	0.0937477	ns
CO2A1_HUMAN	790days	834days	-1.96299	0.0496472	0.347531	ns
CO2A1_HUMAN	790days	872days	-2.48261	0.0130425	0.117383	ns
CO2A1_HUMAN	834days	872days	-0.519615	0.603332	1	ns
CO1A2_HUMAN	2-10days	219days	-0.730297	0.465209	1	ns
CO1A2_HUMAN	2-10days	790days	0.438178	0.661257	1	ns
CO1A2_HUMAN	2-10days	834days	-1.09545	0.273322	1	ns
CO1A2_HUMAN	2-10days	872days	-0.0730297	0.941783	1	ns
CO1A2_HUMAN	219days	790days	0.92376	0.355611	1	ns
CO1A2_HUMAN	219days	834days	-0.288675	0.77283	1	ns
CO1A2_HUMAN	219days	872days	0.519615	0.603332	1	ns
CO1A2_HUMAN	790days	834days	-1.21244	0.225346	1	ns
CO1A2_HUMAN	790days	872days	-0.404145	0.686106	1	ns
CO1A2_HUMAN	834days	872days	0.80829	0.418923	1	ns
TSP1_HUMAN	2-10days	219days	-1.31453	0.188667	1	ns
TSP1_HUMAN	2-10days	790days	1.2415	0.214419	1	ns
TSP1_HUMAN	2-10days	834days	-0.657267	0.511009	1	ns
TSP1_HUMAN	2-10days	872days	-0.146059	0.883875	1	ns
TSP1_HUMAN	219days	790days	2.02073	0.0433081	0.433081	ns
TSP1_HUMAN	219days	834days	0.519615	0.603332	1	ns
TSP1_HUMAN	219days	872days	0.92376	0.355611	1	ns
TSP1_HUMAN	790days	834days	-1.50111	0.133327	1	ns
TSP1_HUMAN	790days	872days	-1.09697	0.272656	1	ns
TSP1_HUMAN	834days	872days	0.404145	0.686106	1	ns
PRDX1_HUMAN	2-10days	219days	0.337836	0.735487	1	ns
PRDX1_HUMAN	2-10days	790days	-0.283052	0.777137	1	ns
PRDX1_HUMAN	2-10days	834days	-0.465665	0.641455	1	ns
PRDX1_HUMAN	2-10days	872days	0.483927	0.628438	1	ns
PRDX1_HUMAN	219days	790days	-0.490854	0.623529	1	ns
PRDX1_HUMAN	219days	834days	-0.635223	0.525283	1	ns
PRDX1_HUMAN	219days	872days	0.115495	0.908053	1	ns
PRDX1_HUMAN	790days	834days	-0.144369	0.885209	1	ns
PRDX1_HUMAN	790days	872days	0.60635	0.544283	1	ns
PRDX1_HUMAN	834days	872days	0.750719	0.452822	1	ns
ITIH4_HUMAN	2-10days	219days	-0.109545	0.912771	1	ns
ITIH4_HUMAN	2-10days	790days	-0.401663	0.687932	1	ns
ITIH4_HUMAN	2-10days	834days	0.109545	0.912771	1	ns
ITIH4_HUMAN	2-10days	872days	1.57014	0.116383	1	ns
ITIH4_HUMAN	219days	790days	-0.23094	0.817361	1	ns
ITIH4_HUMAN	219days	834days	0.173205	0.86249	1	ns
ITIH4_HUMAN	219days	872days	1.32791	0.184209	1	ns
ITIH4_HUMAN	790days	834days	0.404145	0.686106	1	ns
ITIH4_HUMAN	790days	872days	1.55885	0.119033	1	ns
ITIH4_HUMAN	834days	872days	1.1547	0.248213	1	ns
CO9_HUMAN	2-10days	219days	-1.38756	0.16527	1	ns
CO9_HUMAN	2-10days	790days	-0.730297	0.465209	1	ns
CO9_HUMAN	2-10days	834days	-1.46059	0.144127	1	ns
CO9_HUMAN	2-10days	872days	-0.219089	0.826581	1	ns
CO9_HUMAN	219days	790days	0.519615	0.603332	1	ns
CO9_HUMAN	219days	834days	-0.057735	0.95396	1	ns
CO9_HUMAN	219days	872days	0.92376	0.355611	1	ns
CO9_HUMAN	790days	834days	-0.57735	0.563703	1	ns
CO9_HUMAN	790days	872days	0.404145	0.686106	1	ns
CO9_HUMAN	834days	872days	0.981495	0.326348	1	ns
MYH9_HUMAN	2-10days	219days	-1.70537	0.0881253	0.881253	ns
MYH9_HUMAN	2-10days	790days	-1.11858	0.263321	1	ns
MYH9_HUMAN	2-10days	834days	-0.825179	0.40927	1	ns
MYH9_HUMAN	2-10days	872days	-0.898529	0.368904	1	ns
MYH9_HUMAN	219days	790days	0.463902	0.642718	1	ns
MYH9_HUMAN	219days	834days	0.695852	0.486521	1	ns
MYH9_HUMAN	219days	872days	0.637865	0.523562	1	ns
MYH9_HUMAN	790days	834days	0.231951	0.816576	1	ns
MYH9_HUMAN	790days	872days	0.173963	0.861894	1	ns
MYH9_HUMAN	834days	872days	-0.0579877	0.953758	1	ns
BIP_HUMAN	2-10days	219days	1.29656	0.194783	1	ns
BIP_HUMAN	2-10days	790days	1.44265	0.149119	1	ns
BIP_HUMAN	2-10days	834days	0.712194	0.476345	1	ns
BIP_HUMAN	2-10days	872days	0.78524	0.432313	1	ns
BIP_HUMAN	219days	790days	0.115495	0.908053	1	ns
BIP_HUMAN	219days	834days	-0.461981	0.644095	1	ns
BIP_HUMAN	219days	872days	-0.404233	0.686041	1	ns
BIP_HUMAN	790days	834days	-0.577476	0.563618	1	ns
BIP_HUMAN	790days	872days	-0.519728	0.603253	1	ns
BIP_HUMAN	834days	872days	0.0577476	0.95395	1	ns
TPIS_HUMAN	2-10days	219days	-0.310376	0.756275	1	ns
TPIS_HUMAN	2-10days	790days	-0.0912871	0.927264	1	ns
TPIS_HUMAN	2-10days	834days	0.346891	0.728673	1	ns
TPIS_HUMAN	2-10days	872days	-1.55188	0.120691	1	ns
TPIS_HUMAN	219days	790days	0.173205	0.86249	1	ns
TPIS_HUMAN	219days	834days	0.519615	0.603332	1	ns
TPIS_HUMAN	219days	872days	-0.981495	0.326348	1	ns
TPIS_HUMAN	790days	834days	0.34641	0.729034	1	ns
TPIS_HUMAN	790days	872days	-1.1547	0.248213	1	ns
TPIS_HUMAN	834days	872days	-1.50111	0.133327	1	ns
ITIH2_HUMAN	2-10days	219days	-0.986759	0.323761	1	ns
ITIH2_HUMAN	2-10days	790days	-1.27913	0.200851	1	ns
ITIH2_HUMAN	2-10days	834days	-0.402013	0.687675	1	ns
ITIH2_HUMAN	2-10days	872days	-1.42532	0.154065	1	ns
ITIH2_HUMAN	219days	790days	-0.231141	0.817205	1	ns
ITIH2_HUMAN	219days	834days	0.462282	0.643879	1	ns
ITIH2_HUMAN	219days	872days	-0.346712	0.728808	1	ns
ITIH2_HUMAN	790days	834days	0.693424	0.488044	1	ns
ITIH2_HUMAN	790days	872days	-0.115571	0.907993	1	ns
ITIH2_HUMAN	834days	872days	-0.808994	0.418519	1	ns
CO3_HUMAN	2-10days	219days	0.748554	0.454126	1	ns
CO3_HUMAN	2-10days	790days	-1.51537	0.12968	0.778079	ns
CO3_HUMAN	2-10days	834days	0.237346	0.812388	1	ns
CO3_HUMAN	2-10days	872days	-2.53778	0.0111558	0.100402	ns
CO3_HUMAN	219days	790days	-1.78979	0.0734883	0.514418	ns
CO3_HUMAN	219days	834days	-0.404145	0.686106	1	ns
CO3_HUMAN	219days	872days	-2.59808	0.00937477	0.0937477	ns
CO3_HUMAN	790days	834days	1.38564	0.165857	0.829283	ns
CO3_HUMAN	790days	872days	-0.80829	0.418923	1	ns
CO3_HUMAN	834days	872days	-2.19393	0.0282404	0.225923	ns
VWF_HUMAN	2-10days	219days	-1.82574	0.0678892	0.678892	ns
VWF_HUMAN	2-10days	790days	-1.46059	0.144127	1	ns
VWF_HUMAN	2-10days	834days	-1.38756	0.16527	1	ns
VWF_HUMAN	2-10days	872days	-0.292119	0.770196	1	ns
VWF_HUMAN	219days	790days	0.288675	0.77283	1	ns
VWF_HUMAN	219days	834days	0.34641	0.729034	1	ns
VWF_HUMAN	219days	872days	1.21244	0.225346	1	ns
VWF_HUMAN	790days	834days	0.057735	0.95396	1	ns
VWF_HUMAN	790days	872days	0.92376	0.355611	1	ns
VWF_HUMAN	834days	872days	0.866025	0.386476	1	ns
CO1A1_HUMAN	2-10days	219days	-0.219089	0.826581	1	ns
CO1A1_HUMAN	2-10days	790days	0	1	1	ns
CO1A1_HUMAN	2-10days	834days	-0.657267	0.511009	1	ns
CO1A1_HUMAN	2-10days	872days	-0.584237	0.559061	1	ns
CO1A1_HUMAN	219days	790days	0.173205	0.86249	1	ns
CO1A1_HUMAN	219days	834days	-0.34641	0.729034	1	ns
CO1A1_HUMAN	219days	872days	-0.288675	0.77283	1	ns
CO1A1_HUMAN	790days	834days	-0.519615	0.603332	1	ns
CO1A1_HUMAN	790days	872days	-0.46188	0.644167	1	ns
CO1A1_HUMAN	834days	872days	0.057735	0.95396	1	ns
FIBB_HUMAN	2-10days	219days	-0.931128	0.351787	1	ns
FIBB_HUMAN	2-10days	790days	-1.00416	0.315302	1	ns
FIBB_HUMAN	2-10days	834days	-1.15022	0.250054	1	ns
FIBB_HUMAN	2-10days	872days	-1.15022	0.250054	1	ns
FIBB_HUMAN	219days	790days	-0.057735	0.95396	1	ns
FIBB_HUMAN	219days	834days	-0.173205	0.86249	1	ns
FIBB_HUMAN	219days	872days	-0.173205	0.86249	1	ns
FIBB_HUMAN	790days	834days	-0.11547	0.908073	1	ns
FIBB_HUMAN	790days	872days	-0.11547	0.908073	1	ns
FIBB_HUMAN	834days	872days	0	1	1	ns
PPBT_HUMAN	2-10days	219days	-1.50656	0.131922	1	ns
PPBT_HUMAN	2-10days	790days	0.100438	0.919997	1	ns
PPBT_HUMAN	2-10days	834days	-0.593495	0.55285	1	ns
PPBT_HUMAN	2-10days	872days	-0.995246	0.319617	1	ns
PPBT_HUMAN	219days	790days	1.27045	0.203926	1	ns
PPBT_HUMAN	219days	834days	0.721845	0.47039	1	ns
PPBT_HUMAN	219days	872days	0.404233	0.686041	1	ns
PPBT_HUMAN	790days	834days	-0.548602	0.583279	1	ns
PPBT_HUMAN	790days	872days	-0.866214	0.386373	1	ns
PPBT_HUMAN	834days	872days	-0.317612	0.750779	1	ns
CATD_HUMAN	2-10days	219days	1.47004	0.14155	1	ns
CATD_HUMAN	2-10days	790days	0.666541	0.505066	1	ns
CATD_HUMAN	2-10days	834days	-0.173483	0.862272	1	ns
CATD_HUMAN	2-10days	872days	0.739586	0.459551	1	ns
CATD_HUMAN	219days	790days	-0.635223	0.525283	1	ns
CATD_HUMAN	219days	834days	-1.29932	0.193834	1	ns
CATD_HUMAN	219days	872days	-0.577476	0.563618	1	ns
CATD_HUMAN	790days	834days	-0.664097	0.506628	1	ns
CATD_HUMAN	790days	872days	0.0577476	0.95395	1	ns
CATD_HUMAN	834days	872days	0.721845	0.47039	1	ns
CERU_HUMAN	2-10days	219days	0.0182574	0.985433	1	ns
CERU_HUMAN	2-10days	790days	-0.419921	0.674543	1	ns
CERU_HUMAN	2-10days	834days	0.0912871	0.927264	1	ns
CERU_HUMAN	2-10days	872days	0.164317	0.869482	1	ns
CERU_HUMAN	219days	790days	-0.34641	0.729034	1	ns
CERU_HUMAN	219days	834days	0.057735	0.95396	1	ns
CERU_HUMAN	219days	872days	0.11547	0.908073	1	ns
CERU_HUMAN	790days	834days	0.404145	0.686106	1	ns
CERU_HUMAN	790days	872days	0.46188	0.644167	1	ns
CERU_HUMAN	834days	872days	0.057735	0.95396	1	ns
