# Supplementary material for: The ‘ForensOMICS’ approach for postmortem interval estimation from human bone by integrating metabolomics, lipidomics, and proteomics
Source: eLife. 2022 Dec 30;11:e83658. doi: 10.7554/eLife.83658 (PMC9803353; doi:10.7554/eLife.83658)
Supplement: Supplementary file 2. [file elife-83658-supp2.xlsx]

## Sheet: 2018
Date	Max Temp (°F)	Min Temp (°F)	Avg Temp (°F)	Max Temp (°C)	Min Temp (°C)	Avg Temp (°C)	Total Precipitation (in.)	Total Precipitation (cm)
2019-01-01	31	25	28	-0.555556	-3.88889	-2.22222	0	0
2019-01-02	32	24	29	0	-4.44444	-1.66667	0	0
2019-01-03	55	16	31.6	12.7778	-8.88889	-0.222222	0	0
2019-01-04	54	23	40.1	12.2222	-5	4.5	0	0
2019-01-05	60	37	47.4	15.5556	2.77778	8.55556	0	0
2019-01-06	64	28	47.6	17.7778	-2.22222	8.66667	0	0
2019-01-07	69	54	60.9	20.5556	12.2222	16.0556	0	0
2019-01-08	69	36	54.5	20.5556	2.22222	12.5	0	0
2019-01-09	70	32	48.6	21.1111	0	9.22222	0	0
2019-01-10	70	43	55.6	21.1111	6.11111	13.1111	0	0
2019-01-11	71	44	57	21.6667	6.66667	13.8889	0	0
2019-01-12	56	32	43.2	13.3333	0	6.22222	0	0
2019-01-13	51	25	36.7	10.5556	-3.88889	2.61111	0	0
2019-01-14	61	22	39.2	16.1111	-5.55556	4	0	0
2019-01-15	68	29	48.3	20	-1.66667	9.05556	0	0
2019-01-16	37	26	28.6	2.77778	-3.33333	-1.88889	0.14	0.3556
2019-01-17	37	18	25.6	2.77778	-7.77778	-3.55556	0.04	0.1016
2019-01-18	44	27	36.5	6.66667	-2.77778	2.5	0	0
2019-01-19	54	40	46.9	12.2222	4.44444	8.27778	0	0
2019-01-20	63	49	54.9	17.2222	9.44444	12.7222	0.01	0.0254
2019-01-21	71	60	65.4	21.6667	15.5556	18.5556	0	0
2019-01-22	64	41	54.8	17.7778	5	12.6667	0	0
2019-01-23	64	27	44.5	17.7778	-2.77778	6.94444	0	0
2019-01-24	64	24	42.4	17.7778	-4.44444	5.77778	0	0
2019-01-25	65	25	47.4	18.3333	-3.88889	8.55556	0	0
2019-01-26	68	51	58.9	20	10.5556	14.9444	0	0
2019-01-27	70	58	62.2	21.1111	14.4444	16.7778	0.01	0.0254
2019-01-28	70	34	55.9	21.1111	1.11111	13.2778	0.05	0.127
2019-01-29	67	34	49	19.4444	1.11111	9.44444	0	0
2019-01-30	66	27	45	18.8889	-2.77778	7.22222	0	0
2019-01-31	71	38	51.8	21.6667	3.33333	11	0	0
2019-02-01	72	50	60.7	22.2222	10	15.9444	0	0
2019-02-02	59	45	51.7	15	7.22222	10.9444	0	0
2019-02-03	56	41	48.8	13.3333	5	9.33333	0.01	0.0254
2019-02-04	74	34	48.4	23.3333	1.11111	9.11111	0.01	0.0254
2019-02-05	55	40	48.3	12.7778	4.44444	9.05556	0	0
2019-02-06	54	40	47.8	12.2222	4.44444	8.77778	0	0
2019-02-07	47	36	39.9	8.33333	2.22222	4.38889	0.05	0.127
2019-02-08	58	32	45.9	14.4444	0	7.72222	0	0
2019-02-09	62	50	56.2	16.6667	10	13.4444	0	0
2019-02-10	62	39	52.9	16.6667	3.88889	11.6111	0.06	0.1524
2019-02-11	41	30	34.4	5	-1.11111	1.33333	0	0
2019-02-12	41	30	36.5	5	-1.11111	2.5	0.02	0.0508
2019-02-13	46	37	42.4	7.77778	2.77778	5.77778	0.02	0.0508
2019-02-14	70	46	54	21.1111	7.77778	12.2222	0.06	0.1524
2019-02-15	77	64	68.5	25	17.7778	20.2778	0	0
2019-02-16	76	58	64.7	24.4444	14.4444	18.1667	0	0
2019-02-17	60	47	54	15.5556	8.33333	12.2222	0	0
2019-02-18	77	51	60.1	25	10.5556	15.6111	0.02	0.0508
2019-02-19	80	69	73.5	26.6667	20.5556	23.0556	0	0
2019-02-20	73	70	71.7	22.7778	21.1111	22.0556	0	0
2019-02-21	72	40	46	22.2222	4.44444	7.77778	0.04	0.1016
2019-02-22	44	37	40.3	6.66667	2.77778	4.61111	0.28	0.7112
2019-02-23	63	43	50.6	17.2222	6.11111	10.3333	0.09	0.2286
2019-02-24	75	62	69.4	23.8889	16.6667	20.7778	0.26	0.6604
2019-02-25	63	48	57.3	17.2222	8.88889	14.0556	0	0
2019-02-26	68	49	54	20	9.44444	12.2222	0.11	0.2794
2019-02-27	81	57	66.6	27.2222	13.8889	19.2222	0.01	0.0254
2019-02-28	83	68	72.2	28.3333	20	22.3333	0.03	0.0762
2019-03-01	70	51	63.3	21.1111	10.5556	17.3889	0	0
2019-03-02	74	47	60.3	23.3333	8.33333	15.7222	0	0
2019-03-03	72	46	61	22.2222	7.77778	16.1111	0	0
2019-03-04	79	64	70.4	26.1111	17.7778	21.3333	0.1	0.254
2019-03-05	83	61	71.5	28.3333	16.1111	21.9444	0	0
2019-03-06	73	50	60.8	22.7778	10	16	0	0
2019-03-07	66	44	53.5	18.8889	6.66667	11.9444	0	0
2019-03-08	70	43	55.7	21.1111	6.11111	13.1667	0	0
2019-03-09	72	47	61.7	22.2222	8.33333	16.5	0	0
2019-03-10	88	66	72.3	31.1111	18.8889	22.3889	0	0
2019-03-11	70	56	66.1	21.1111	13.3333	18.9444	0	0
2019-03-12	66	41	54.2	18.8889	5	12.3333	0	0
2019-03-13	70	37	52.6	21.1111	2.77778	11.4444	0	0
2019-03-14	71	34	53.8	21.6667	1.11111	12.1111	0	0
2019-03-15	73	40	60.2	22.7778	4.44444	15.6667	0	0
2019-03-16	87	63	70	30.5556	17.2222	21.1111	0	0
2019-03-17	83	60	72.1	28.3333	15.5556	22.2778	0	0
2019-03-18	81	62	72.1	27.2222	16.6667	22.2778	0.02	0.0508
2019-03-19	83	57	70.9	28.3333	13.8889	21.6111	0	0
2019-03-20	74	45	59.4	23.3333	7.22222	15.2222	0	0
2019-03-21	78	39	59.5	25.5556	3.88889	15.2778	0	0
2019-03-22	80	45	63.7	26.6667	7.22222	17.6111	0	0
2019-03-23	80	55	67.4	26.6667	12.7778	19.6667	0	0
2019-03-24	83	67	73.6	28.3333	19.4444	23.1111	0	0
2019-03-25	77	68	71.7	25	20	22.0556	0	0
2019-03-26	85	66	74.1	29.4444	18.8889	23.3889	0.01	0.0254
2019-03-27	82	63	71.7	27.7778	17.2222	22.0556	0	0
2019-03-28	72	59	64.3	22.2222	15	17.9444	4.37	11.0998
2019-03-29	83	56	65.7	28.3333	13.3333	18.7222	1.71	4.3434
2019-03-30	74	55	64	23.3333	12.7778	17.7778	0	0
2019-03-31	83	54	66	28.3333	12.2222	18.8889	0	0
2019-04-01	82	64	71.2	27.7778	17.7778	21.7778	0	0
2019-04-02	85	58	70.8	29.4444	14.4444	21.5556	0	0
2019-04-03	80	65	72.7	26.6667	18.3333	22.6111	0	0
2019-04-04	70	50	59.8	21.1111	10	15.4444	0	0
2019-04-05	78	56	68	25.5556	13.3333	20	0	0
2019-04-06	85	71	75.6	29.4444	21.6667	24.2222	0	0
2019-04-07	72	41	50	22.2222	5	10	0.31	0.7874
2019-04-08	64	42	50.4	17.7778	5.55556	10.2222	0	0
2019-04-09	65	51	59.4	18.3333	10.5556	15.2222	0	0
2019-04-10	74	49	62	23.3333	9.44444	16.6667	0	0
2019-04-11	81	43	63.3	27.2222	6.11111	17.3889	0	0
2019-04-12	85	61	70.8	29.4444	16.1111	21.5556	0	0
2019-04-13	85	60	74.1	29.4444	15.5556	23.3889	0	0
2019-04-14	70	49	61.4	21.1111	9.44444	16.3333	0.1	0.254
2019-04-15	73	41	55.7	22.7778	5	13.1667	0	0
2019-04-16	82	41	63	27.7778	5	17.2222	0	0
2019-04-17	84	54	69.3	28.8889	12.2222	20.7222	0	0
2019-04-18	81	57	70	27.2222	13.8889	21.1111	0	0
2019-04-19	76	53	64	24.4444	11.6667	17.7778	0	0
2019-04-20	67	51	59.5	19.4444	10.5556	15.2778	0	0
2019-04-21	71	59	64.8	21.6667	15	18.2222	0	0
2019-04-22	76	53	62.4	24.4444	11.6667	16.8889	0.24	0.6096
2019-04-23	84	48	66.1	28.8889	8.88889	18.9444	0	0
2019-04-24	85	51	68.5	29.4444	10.5556	20.2778	0	0
2019-04-25	86	53	65.6	30	11.6667	18.6667	0	0
2019-04-26	76	46	61.6	24.4444	7.77778	16.4444	0.32	0.8128
2019-04-27	78	51	65.3	25.5556	10.5556	18.5	0	0
2019-04-28	83	52	68.8	28.3333	11.1111	20.4444	0	0
2019-04-29	81	51	68.4	27.2222	10.5556	20.2222	0	0
2019-04-30	77	58	69.7	25	14.4444	20.9444	0	0
2019-05-01	81	70	74.1	27.2222	21.1111	23.3889	0	0
2019-05-02	86	73	77.7	30	22.7778	25.3889	0	0
2019-05-03	85	75	78.9	29.4444	23.8889	26.0556	0	0
2019-05-04	74	63	68.1	23.3333	17.2222	20.0556	0.03	0.0762
2019-05-05	83	59	70	28.3333	15	21.1111	2.56	6.5024
2019-05-06	87	55	71.8	30.5556	12.7778	22.1111	0	0
2019-05-07	90	53	72.2	32.2222	11.6667	22.3333	0	0
2019-05-08	88	63	75.9	31.1111	17.2222	24.3889	0	0
2019-05-09	88	60	73.5	31.1111	15.5556	23.0556	0	0
2019-05-10	88	60	71.2	31.1111	15.5556	21.7778	0	0
2019-05-11	90	70	77.7	32.2222	21.1111	25.3889	0	0
2019-05-12	92	71	80.1	33.3333	21.6667	26.7222	0	0
2019-05-13	91	73	79.3	32.7778	22.7778	26.2778	0	0
2019-05-14	90	73	80	32.2222	22.7778	26.6667	0	0
2019-05-15	90	73	79.9	32.2222	22.7778	26.6111	0	0
2019-05-16	95	67	80.5	35	19.4444	26.9444	0.01	0.0254
2019-05-17	96	65	82.3	35.5556	18.3333	27.9444	0	0
2019-05-18	95	72	80.1	35	22.2222	26.7222	0	0
2019-05-19	93	74	81.5	33.8889	23.3333	27.5	0	0
2019-05-20	85	70	75.1	29.4444	21.1111	23.9444	0	0
2019-05-21	84	70	74.6	28.8889	21.1111	23.6667	0.48	1.2192
2019-05-22	88	67	76.2	31.1111	19.4444	24.5556	0	0
2019-05-23	88	66	75.4	31.1111	18.8889	24.1111	0	0
2019-05-24	91	69	77	32.7778	20.5556	25	0.15	0.381
2019-05-25	95	72	80.9	35	22.2222	27.1667	0	0
2019-05-26	96	72	84.4	35.5556	22.2222	29.1111	0	0
2019-05-27	96	71	84.2	35.5556	21.6667	29	0	0
2019-05-28	95	69	84.3	35	20.5556	29.0556	0	0
2019-05-29	95	69	83.1	35	20.5556	28.3889	0	0
2019-05-30	96	71	82	35.5556	21.6667	27.7778	0	0
2019-05-31	98	75	83.2	36.6667	23.8889	28.4444	0	0
2019-06-01	98	75	84.4	36.6667	23.8889	29.1111	0	0
2019-06-02	100	76	86	37.7778	24.4444	30	0	0
2019-06-03	99	76	85.5	37.2222	24.4444	29.7222	0	0
2019-06-04	91	74	79.9	32.7778	23.3333	26.6111	0.11	0.2794
2019-06-05	100	73	85.6	37.7778	22.7778	29.7778	0	0
2019-06-06	99	76	85.6	37.2222	24.4444	29.7778	0	0
2019-06-07	98	74	84.3	36.6667	23.3333	29.0556	0	0
2019-06-08	96	71	82.7	35.5556	21.6667	28.1667	0	0
2019-06-09	96	74	81.4	35.5556	23.3333	27.4444	0	0
2019-06-10	98	76	84.9	36.6667	24.4444	29.3889	0	0
2019-06-11	97	77	85.7	36.1111	25	29.8333	0	0
2019-06-12	98	77	85.1	36.6667	25	29.5	0	0
2019-06-13	98	73	84	36.6667	22.7778	28.8889	0	0
2019-06-14	97	69	81.4	36.1111	20.5556	27.4444	0	0
2019-06-15	96	71	80.9	35.5556	21.6667	27.1667	0	0
2019-06-16	94	71	81.9	34.4444	21.6667	27.7222	0	0
2019-06-17	93	70	80.5	33.8889	21.1111	26.9444	0.02	0.0508
2019-06-18	94	75	80	34.4444	23.8889	26.6667	0.03	0.0762
2019-06-19	80	74	76.2	26.6667	23.3333	24.5556	0.04	0.1016
2019-06-20	82	75	77.8	27.7778	23.8889	25.4444	0.19	0.4826
2019-06-21	93	74	80.8	33.8889	23.3333	27.1111	0.22	0.5588
2019-06-22	98	76	85.5	36.6667	24.4444	29.7222	0	0
2019-06-23	98	75	85.3	36.6667	23.8889	29.6111	0	0
2019-06-24	98	77	85.8	36.6667	25	29.8889	0	0
2019-06-25	94	77	83.8	34.4444	25	28.7778	0	0
2019-06-26	97	77	85	36.1111	25	29.4444	0.01	0.0254
2019-06-27	98	75	85	36.6667	23.8889	29.4444	0	0
2019-06-28	98	74	84	36.6667	23.3333	28.8889	0	0
2019-06-29	98	76	85.1	36.6667	24.4444	29.5	0	0
2019-06-30	99	77	85.8	37.2222	25	29.8889	0	0
2019-07-01	103	76	85.9	39.4444	24.4444	29.9444	0	0
2019-07-02	100	74	86.4	37.7778	23.3333	30.2222	0	0
2019-07-03	101	74	85.5	38.3333	23.3333	29.7222	0	0
2019-07-04	98	72	79.2	36.6667	22.2222	26.2222	0	0
2019-07-05	93	71	79.5	33.8889	21.6667	26.3889	0.63	1.6002
2019-07-06	95	74	84.1	35	23.3333	28.9444	0.15	0.381
2019-07-07	92	73	80.6	33.3333	22.7778	27	0.06	0.1524
2019-07-08	95	71	80.9	35	21.6667	27.1667	0	0
2019-07-09	83	72	76.4	28.3333	22.2222	24.6667	0	0
2019-07-10	94	70	79.2	34.4444	21.1111	26.2222	0.42	1.0668
2019-07-11	96	74	84.5	35.5556	23.3333	29.1667	0	0
2019-07-12	96	74	84.9	35.5556	23.3333	29.3889	0	0
2019-07-13	96	74	83.9	35.5556	23.3333	28.8333	0	0
2019-07-14	97	75	84.6	36.1111	23.8889	29.2222	0	0
2019-07-15	97	75	85.3	36.1111	23.8889	29.6111	0	0
2019-07-16	98	75	84.9	36.6667	23.8889	29.3889	0	0
2019-07-17	99	73	84.4	37.2222	22.7778	29.1111	0	0
2019-07-18	101	74	86.9	38.3333	23.3333	30.5	0	0
2019-07-19	103	76	86.8	39.4444	24.4444	30.4444	0	0
2019-07-20	103	75	87.4	39.4444	23.8889	30.7778	0	0
2019-07-21	102	71	85	38.8889	21.6667	29.4444	0	0
2019-07-22	104	75	89.2	40	23.8889	31.7778	0	0
2019-07-23	109	76	92.2	42.7778	24.4444	33.4444	0	0
2019-07-24	101	81	90.7	38.3333	27.2222	32.6111	0	0
2019-07-25	101	75	87.8	38.3333	23.8889	31	0	0
2019-07-26	99	70	86.6	37.2222	21.1111	30.3333	0	0
2019-07-27	102	69	86.9	38.8889	20.5556	30.5	0	0
2019-07-28	100	69	86.5	37.7778	20.5556	30.2778	0	0
2019-07-29	102	74	87.4	38.8889	23.3333	30.7778	0	0
2019-07-30	100	77	88.2	37.7778	25	31.2222	0	0
2019-07-31	98	76	85.8	36.6667	24.4444	29.8889	0	0
2019-08-01	99	69	83.5	37.2222	20.5556	28.6111	0	0
2019-08-02	98	64	82.7	36.6667	17.7778	28.1667	0	0
2019-08-03	98	68	84.6	36.6667	20	29.2222	0	0
2019-08-04	97	67	82.5	36.1111	19.4444	28.0556	0	0
2019-08-05	97	73	83	36.1111	22.7778	28.3333	0	0
2019-08-06	95	71	83	35	21.6667	28.3333	0	0
2019-08-07	99	73	84.6	37.2222	22.7778	29.2222	0	0
2019-08-08	100	78	86.2	37.7778	25.5556	30.1111	0	0
2019-08-09	99	72	86.3	37.2222	22.2222	30.1667	0	0
2019-08-10	97	76	85.8	36.1111	24.4444	29.8889	0	0
2019-08-11	96	78	82.9	35.5556	25.5556	28.2778	0	0
2019-08-12	91	75	79.2	32.7778	23.8889	26.2222	0.03	0.0762
2019-08-13	96	76	84.5	35.5556	24.4444	29.1667	0.58	1.4732
2019-08-14	97	74	84.7	36.1111	23.3333	29.2778	0	0
2019-08-15	100	75	85.7	37.7778	23.8889	29.8333	0	0
2019-08-16	101	77	87.3	38.3333	25	30.7222	0	0
2019-08-17	102	73	86.5	38.8889	22.7778	30.2778	0	0
2019-08-18	101	76	87.7	38.3333	24.4444	30.9444	0	0
2019-08-19	102	76	86.9	38.8889	24.4444	30.5	0	0
2019-08-20	101	79	88.6	38.3333	26.1111	31.4444	0.23	0.5842
2019-08-21	102	77	89.3	38.8889	25	31.8333	0	0
2019-08-22	102	78	89.5	38.8889	25.5556	31.9444	0	0
2019-08-23	102	75	89.1	38.8889	23.8889	31.7222	0	0
2019-08-24	101	73	87.5	38.3333	22.7778	30.8333	0	0
2019-08-25	100	79	90.1	37.7778	26.1111	32.2778	0	0
2019-08-26	100	76	85.7	37.7778	24.4444	29.8333	0	0
2019-08-27	101	76	87.3	38.3333	24.4444	30.7222	0	0
2019-08-28	102	84	93.4	38.8889	28.8889	34.1111	0	0
2019-08-29	100	78	85.7	37.7778	25.5556	29.8333	0	0
2019-08-30	99	74	84.5	37.2222	23.3333	29.1667	0	0
2019-08-31	99	70	83.7	37.2222	21.1111	28.7222	0	0
2019-09-01	98	73	85.2	36.6667	22.7778	29.5556	0	0
2019-09-02	98	74	84.4	36.6667	23.3333	29.1111	0	0
2019-09-03	94	75	80.2	34.4444	23.8889	26.7778	0	0
2019-09-04	92	76	80.4	33.3333	24.4444	26.8889	0.78	1.9812
2019-09-05	94	74	81.7	34.4444	23.3333	27.6111	0.07	0.1778
2019-09-06	93	76	81.9	33.8889	24.4444	27.7222	0	0
2019-09-07	87	75	79.7	30.5556	23.8889	26.5	0.03	0.0762
2019-09-08	91	74	80.5	32.7778	23.3333	26.9444	0.34	0.8636
2019-09-09	79	73	75.6	26.1111	22.7778	24.2222	0.49	1.2446
2019-09-10	77	72	74.7	25	22.2222	23.7222	1.59	4.0386
2019-09-11	85	72	75.7	29.4444	22.2222	24.2778	0.21	0.5334
2019-09-12	86	75	78.7	30	23.8889	25.9444	0.21	0.5334
2019-09-13	90	73	79.2	32.2222	22.7778	26.2222	0.28	0.7112
2019-09-14	85	73	78	29.4444	22.7778	25.5556	0	0
2019-09-15	85	74	78.2	29.4444	23.3333	25.6667	0.41	1.0414
2019-09-16	89	72	77.2	31.6667	22.2222	25.1111	0.1	0.254
2019-09-17	92	70	79.5	33.3333	21.1111	26.3889	0.12	0.3048
2019-09-18	93	74	82.3	33.8889	23.3333	27.9444	0	0
2019-09-19	93	71	80.5	33.8889	21.6667	26.9444	0	0
2019-09-20	89	76	79.1	31.6667	24.4444	26.1667	0	0
2019-09-21	89	77	81.9	31.6667	25	27.7222	0.27	0.6858
2019-09-22	80	71	75.5	26.6667	21.6667	24.1667	0.6	1.524
2019-09-23	80	66	73	26.6667	18.8889	22.7778	0.04	0.1016
2019-09-24	90	72	78.4	32.2222	22.2222	25.7778	0	0
2019-09-25	93	74	81.4	33.8889	23.3333	27.4444	0	0
2019-09-26	88	70	78.5	31.1111	21.1111	25.8333	0	0
2019-09-27	79	63	69.9	26.1111	17.2222	21.0556	0.05	0.127
2019-09-28	84	60	73	28.8889	15.5556	22.7778	0	0
2019-09-29	81	71	75.4	27.2222	21.6667	24.1111	0	0
2019-09-30	85	68	74.2	29.4444	20	23.4444	0	0
2019-10-01	86	67	75	30	19.4444	23.8889	0	0
2019-10-02	89	69	76.7	31.6667	20.5556	24.8333	0.07	0.1778
2019-10-03	91	73	79.2	32.7778	22.7778	26.2222	0	0
2019-10-04	91	72	80.5	32.7778	22.2222	26.9444	0	0
2019-10-05	92	74	80.2	33.3333	23.3333	26.7778	0	0
2019-10-06	87	75	79.1	30.5556	23.8889	26.1667	0	0
2019-10-07	89	71	78.8	31.6667	21.6667	26	0.49	1.2446
2019-10-08	83	72	76.1	28.3333	22.2222	24.5	0	0
2019-10-09	82	69	74.9	27.7778	20.5556	23.8333	0.53	1.3462
2019-10-10	78	63	69.5	25.5556	17.2222	20.8333	0.47	1.1938
2019-10-11	75	60	67.5	23.8889	15.5556	19.7222	0	0
2019-10-12	85	60	73.6	29.4444	15.5556	23.1111	0	0
2019-10-13	91	72	80	32.7778	22.2222	26.6667	0	0
2019-10-14	90	69	77.3	32.2222	20.5556	25.1667	0.14	0.3556
2019-10-15	76	45	49.9	24.4444	7.22222	9.94444	0.02	0.0508
2019-10-16	52	48	49.8	11.1111	8.88889	9.88889	2.55	6.477
2019-10-17	60	51	55.9	15.5556	10.5556	13.2778	0.33	0.8382
2019-10-18	62	55	58.6	16.6667	12.7778	14.7778	0.04	0.1016
2019-10-19	66	60	63.1	18.8889	15.5556	17.2778	0.16	0.4064
2019-10-20	68	61	65.2	20	16.1111	18.4444	1	2.54
2019-10-21	74	56	63.5	23.3333	13.3333	17.5	0	0
2019-10-22	65	56	59.7	18.3333	13.3333	15.3889	0	0
2019-10-23	67	53	59.8	19.4444	11.6667	15.4444	0.3	0.762
2019-10-24	63	58	60.3	17.2222	14.4444	15.7222	0.11	0.2794
2019-10-25	68	52	60.7	20	11.1111	15.9444	0.42	1.0668
2019-10-26	80	49	62.8	26.6667	9.44444	17.1111	0	0
2019-10-27	86	50	67.2	30	10	19.5556	0	0
2019-10-28	84	54	67	28.8889	12.2222	19.4444	0	0
2019-10-29	84	55	66.9	28.8889	12.7778	19.3889	0	0
2019-10-30	84	66	73.5	28.8889	18.8889	23.0556	0	0
2019-10-31	84	59	70.6	28.8889	15	21.4444	0	0
2019-11-01	69	48	58.6	20.5556	8.88889	14.7778	0.57	1.4478
2019-11-02	77	41	58.7	25	5	14.8333	0	0
2019-11-03	78	48	64.1	25.5556	8.88889	17.8333	0	0
2019-11-04	73	52	63.6	22.7778	11.1111	17.5556	0.51	1.2954
2019-11-05	79	52	67	26.1111	11.1111	19.4444	0	0
2019-11-06	80	59	68.2	26.6667	15	20.1111	0	0
2019-11-07	88	64	75.9	31.1111	17.7778	24.3889	0.01	0.0254
2019-11-08	63	57	60.4	17.2222	13.8889	15.7778	0	0
2019-11-09	60	51	54.6	15.5556	10.5556	12.5556	1.08	2.7432
2019-11-10	54	48	50.5	12.2222	8.88889	10.2778	0.01	0.0254
2019-11-11	55	48	51.4	12.7778	8.88889	10.7778	0	0
2019-11-12	51	40	47.6	10.5556	4.44444	8.66667	0.33	0.8382
2019-11-13	47	35	39.4	8.33333	1.66667	4.11111	0.04	0.1016
2019-11-14	56	25	39.9	13.3333	-3.88889	4.38889	0	0
2019-11-15	64	28	45	17.7778	-2.22222	7.22222	0	0
2019-11-16	70	32	49.3	21.1111	0	9.61111	0	0
2019-11-17	75	39	55.4	23.8889	3.88889	13	0	0
2019-11-18	62	45	52.6	16.6667	7.22222	11.4444	0.13	0.3302
2019-11-19	53	44	49	11.6667	6.66667	9.44444	0.16	0.4064
2019-11-20	63	38	48.7	17.2222	3.33333	9.27778	0	0
2019-11-21	56	36	47.5	13.3333	2.22222	8.61111	0	0
2019-11-22	62	50	56	16.6667	10	13.3333	0.03	0.0762
2019-11-23	79	49	61.2	26.1111	9.44444	16.2222	0	0
2019-11-24	76	40	58.2	24.4444	4.44444	14.5556	0	0
2019-11-25	69	50	61.8	20.5556	10	16.5556	0	0
2019-11-26	59	32	47	15	0	8.33333	0	0
2019-11-27	64	30	46.4	17.7778	-1.11111	8	0	0
2019-11-28	71	45	57.3	21.6667	7.22222	14.0556	0	0
2019-11-29	75	52	63.9	23.8889	11.1111	17.7222	0	0
2019-11-30	77	67	70.3	25	19.4444	21.2778	0	0
2019-12-01	79	46	64.8	26.1111	7.77778	18.2222	0.04	0.1016
2019-12-02	70	43	55.3	21.1111	6.11111	12.9444	0	0
2019-12-03	64	42	54.2	17.7778	5.55556	12.3333	0	0
2019-12-04	57	39	47.3	13.8889	3.88889	8.5	0	0
2019-12-05	57	42	48.5	13.8889	5.55556	9.16667	0	0
2019-12-06	58	55	56.8	14.4444	12.7778	13.7778	0	0
2019-12-07	56	48	51.7	13.3333	8.88889	10.9444	1.26	3.2004
2019-12-08	48	43	45.8	8.88889	6.11111	7.66667	2.84	7.2136
2019-12-09	55	37	44.4	12.7778	2.77778	6.88889	0	0
2019-12-10	59	34	44.5	15	1.11111	6.94444	0	0
2019-12-11	63	30	45.9	17.2222	-1.11111	7.72222	0	0
2019-12-12	67	48	58.7	19.4444	8.88889	14.8333	0	0
2019-12-13	71	46	59.5	21.6667	7.77778	15.2778	0	0
2019-12-14	54	45	49.2	12.2222	7.22222	9.55556	0	0
2019-12-15	69	38	52.3	20.5556	3.33333	11.2778	0	0
2019-12-16	65	30	47.1	18.3333	-1.11111	8.38889	0	0
2019-12-17	72	38	53.3	22.2222	3.33333	11.8333	0	0
2019-12-18	64	35	50.1	17.7778	1.66667	10.0556	0	0
2019-12-19	63	50	57.1	17.2222	10	13.9444	0.03	0.0762
2019-12-20	65	50	57.3	18.3333	10	14.0556	0	0
2019-12-21	66	38	50.6	18.8889	3.33333	10.3333	0	0
2019-12-22	79	43	56.5	26.1111	6.11111	13.6111	0	0
2019-12-23	63	40	51.8	17.2222	4.44444	11	0	0
2019-12-24	65	33	51.2	18.3333	0.555556	10.6667	0	0
2019-12-25	76	59	65.4	24.4444	15	18.5556	0	0
2019-12-26	72	54	66.6	22.2222	12.2222	19.2222	0	0
2019-12-27	70	49	57.6	21.1111	9.44444	14.2222	1.91	4.8514
2019-12-28	54	41	47.3	12.2222	5	8.5	0	0
2019-12-29	47	43	44.3	8.33333	6.11111	6.83333	0	0
2019-12-30	43	39	40.8	6.11111	3.88889	4.88889	0	0
2019-12-31	61	36	47.6	16.1111	2.22222	8.66667	0.29	0.7366

## Sheet: 2017
Date	Max Temp (°F)	Min Temp (°F)	Avg Temp (°F)	Max Temp (°C)	Min Temp (°C)	Avg Temp (°C)	Total Precipitation (in.)	Total Precipitation (cm)
2019-01-01	76	50	58.6	24.4444	10	14.7778	0	0
2019-01-02	76	54	62.2	24.4444	12.2222	16.7778	0.15	0.381
2019-01-03	77	40	57.3	25	4.44444	14.0556	0.31	0.7874
2019-01-04	48	36	42.5	8.88889	2.22222	5.83333	0	0
2019-01-05	64	36	48.5	17.7778	2.22222	9.16667	0	0
2019-01-06	35	24	30.8	1.66667	-4.44444	-0.666667	0	0
2019-01-07	43	20	28.4	6.11111	-6.66667	-2	0	0
2019-01-08	52	17	35.9	11.1111	-8.33333	2.16667	0	0
2019-01-09	73	40	56.6	22.7778	4.44444	13.6667	0	0
2019-01-10	81	59	65	27.2222	15	18.3333	0	0
2019-01-11	80	56	68	26.6667	13.3333	20	0	0
2019-01-12	81	65	72.8	27.2222	18.3333	22.6667	0	0
2019-01-13	80	56	69.3	26.6667	13.3333	20.7222	0	0
2019-01-14	56	48	51.6	13.3333	8.88889	10.8889	0.34	0.8636
2019-01-15	75	51	62.8	23.8889	10.5556	17.1111	0.07	0.1778
2019-01-16	70	59	63.9	21.1111	15	17.7222	1.24	3.1496
2019-01-17	59	50	53	15	10	11.6667	0.03	0.0762
2019-01-18	57	48	51.6	13.8889	8.88889	10.8889	1.41	3.5814
2019-01-19	69	51	57.2	20.5556	10.5556	14	1.1	2.794
2019-01-20	76	47	59.3	24.4444	8.33333	15.1667	0	0
2019-01-21	82	45	62.7	27.7778	7.22222	17.0556	0	0
2019-01-22	69	50	62.4	20.5556	10	16.8889	0	0
2019-01-23	75	43	57.6	23.8889	6.11111	14.2222	0	0
2019-01-24	85	41	64.9	29.4444	5	18.2778	0	0
2019-01-25	69	43	61.9	20.5556	6.11111	16.6111	0	0
2019-01-26	58	34	45.1	14.4444	1.11111	7.27778	0	0
2019-01-27	57	33	46.3	13.8889	0.555556	7.94444	0	0
2019-01-28	61	39	50.1	16.1111	3.88889	10.0556	0	0
2019-01-29	70	31	51.3	21.1111	-0.555556	10.7222	0	0
2019-01-30	80	33	56.6	26.6667	0.555556	13.6667	0	0
2019-01-31	77	39	59	25	3.88889	15	0	0
2019-02-01	82	42	58.8	27.7778	5.55556	14.8889	0	0
2019-02-02	66	47	56.6	18.8889	8.33333	13.6667	0	0
2019-02-03	53	47	49.9	11.6667	8.33333	9.94444	0	0
2019-02-04	53	48	50.7	11.6667	8.88889	10.3889	0	0
2019-02-05	74	52	61.8	23.3333	11.1111	16.5556	0.02	0.0508
2019-02-06	79	69	72	26.1111	20.5556	22.2222	0.02	0.0508
2019-02-07	88	53	71	31.1111	11.6667	21.6667	0	0
2019-02-08	86	48	67.6	30	8.88889	19.7778	0	0
2019-02-09	67	43	53.8	19.4444	6.11111	12.1111	0	0
2019-02-10	79	42	63.6	26.1111	5.55556	17.5556	0	0
2019-02-11	87	68	74.8	30.5556	20	23.7778	0	0
2019-02-12	84	64	71.4	28.8889	17.7778	21.8889	0	0
2019-02-13	79	64	69.5	26.1111	17.7778	20.8333	0	0
2019-02-14	68	49	55	20	9.44444	12.7778	1.12	2.8448
2019-02-15	65	41	51.6	18.3333	5	10.8889	0.12	0.3048
2019-02-16	69	35	51.2	20.5556	1.66667	10.6667	0	0
2019-02-17	77	47	61.5	25	8.33333	16.3889	0	0
2019-02-18	86	62	71.6	30	16.6667	22	0	0
2019-02-19	80	67	73.1	26.6667	19.4444	22.8333	0	0
2019-02-20	71	59	62	21.6667	15	16.6667	1.32	3.3528
2019-02-21	80	49	63.3	26.6667	9.44444	17.3889	0.05	0.127
2019-02-22	85	44	63.8	29.4444	6.66667	17.6667	0	0
2019-02-23	89	46	68.1	31.6667	7.77778	20.0556	0	0
2019-02-24	81	54	66.8	27.2222	12.2222	19.3333	0	0
2019-02-25	62	40	51.3	16.6667	4.44444	10.7222	0	0
2019-02-26	73	36	56.8	22.7778	2.22222	13.7778	0	0
2019-02-27	82	67	73.3	27.7778	19.4444	22.9444	0.01	0.0254
2019-02-28	81	67	73.7	27.2222	19.4444	23.1667	0	0
2019-03-01	73	46	65.5	22.7778	7.77778	18.6111	0	0
2019-03-02	65	41	53.9	18.3333	5	12.1667	0	0
2019-03-03	68	34	54.2	20	1.11111	12.3333	0	0
2019-03-04	60	54	57.5	15.5556	12.2222	14.1667	0	0
2019-03-05	74	59	65.9	23.3333	15	18.8333	0.95	2.413
2019-03-06	82	69	73.6	27.7778	20.5556	23.1111	0.27	0.6858
2019-03-07	74	60	66.5	23.3333	15.5556	19.1667	0	0
2019-03-08	75	60	67.4	23.8889	15.5556	19.6667	0	0
2019-03-09	80	67	70.7	26.6667	19.4444	21.5	0	0
2019-03-10	81	57	68.3	27.2222	13.8889	20.1667	0	0
2019-03-11	68	61	64.7	20	16.1111	18.1667	0.02	0.0508
2019-03-12	60	48	50.3	15.5556	8.88889	10.1667	0.66	1.6764
2019-03-13	68	45	54.6	20	7.22222	12.5556	0	0
2019-03-14	72	39	53.7	22.2222	3.88889	12.0556	0.02	0.0508
2019-03-15	74	43	58.4	23.3333	6.11111	14.6667	0	0
2019-03-16	79	60	67.7	26.1111	15.5556	19.8333	0.01	0.0254
2019-03-17	82	65	70.8	27.7778	18.3333	21.5556	0	0
2019-03-18	83	56	70	28.3333	13.3333	21.1111	0	0
2019-03-19	83	65	71.7	28.3333	18.3333	22.0556	0	0
2019-03-20	85	65	71.5	29.4444	18.3333	21.9444	0	0
2019-03-21	84	63	70.6	28.8889	17.2222	21.4444	0	0
2019-03-22	83	66	72.6	28.3333	18.8889	22.5556	0	0
2019-03-23	85	66	72.8	29.4444	18.8889	22.6667	0	0
2019-03-24	83	67	72.2	28.3333	19.4444	22.3333	0	0
2019-03-25	81	50	65.5	27.2222	10	18.6111	0.09	0.2286
2019-03-26	86	55	70.8	30	12.7778	21.5556	0	0
2019-03-27	83	68	75	28.3333	20	23.8889	0	0
2019-03-28	88	70	75.4	31.1111	21.1111	24.1111	0	0
2019-03-29	84	61	68	28.8889	16.1111	20	1.31	3.3274
2019-03-30	80	52	65.6	26.6667	11.1111	18.6667	0	0
2019-03-31	85	50	69	29.4444	10	20.5556	0	0
2019-04-01	79	64	71.5	26.1111	17.7778	21.9444	0	0
2019-04-02	78	60	67	25.5556	15.5556	19.4444	0.04	0.1016
2019-04-03	86	48	66.9	30	8.88889	19.3889	0.73	1.8542
2019-04-04	87	53	71.4	30.5556	11.6667	21.8889	0	0
2019-04-05	74	51	63.8	23.3333	10.5556	17.6667	0	0
2019-04-06	77	44	60.5	25	6.66667	15.8333	0	0
2019-04-07	79	44	64	26.1111	6.66667	17.7778	0	0
2019-04-08	81	53	68.4	27.2222	11.6667	20.2222	0	0
2019-04-09	81	63	71.2	27.2222	17.2222	21.7778	0	0
2019-04-10	81	72	74.9	27.2222	22.2222	23.8333	0	0
2019-04-11	73	64	68.3	22.7778	17.7778	20.1667	0.07	0.1778
2019-04-12	78	61	67.8	25.5556	16.1111	19.8889	0.1	0.254
2019-04-13	83	65	71.3	28.3333	18.3333	21.8333	0	0
2019-04-14	83	58	69.7	28.3333	14.4444	20.9444	0	0
2019-04-15	83	67	73.2	28.3333	19.4444	22.8889	0	0
2019-04-16	84	68	74.7	28.8889	20	23.7222	0	0
2019-04-17	78	64	70.7	25.5556	17.7778	21.5	0	0
2019-04-18	79	61	69.2	26.1111	16.1111	20.6667	0.05	0.127
2019-04-19	85	67	73.7	29.4444	19.4444	23.1667	0	0
2019-04-20	87	69	75.5	30.5556	20.5556	24.1667	0	0
2019-04-21	88	71	77.2	31.1111	21.6667	25.1111	0	0
2019-04-22	72	60	65.9	22.2222	15.5556	18.8333	0	0
2019-04-23	76	50	63	24.4444	10	17.2222	0	0
2019-04-24	81	44	65.1	27.2222	6.66667	18.3889	0	0
2019-04-25	90	60	74	32.2222	15.5556	23.3333	0	0
2019-04-26	91	65	79.2	32.7778	18.3333	26.2222	0	0
2019-04-27	84	46	67.8	28.8889	7.77778	19.8889	0	0
2019-04-28	95	71	80.4	35	21.6667	26.8889	0	0
2019-04-29	92	67	79.6	33.3333	19.4444	26.4444	0	0
2019-04-30	78	52	62.3	25.5556	11.1111	16.8333	0.16	0.4064
2019-05-01	89	51	70.7	31.6667	10.5556	21.5	0	0
2019-05-02	91	51	74.1	32.7778	10.5556	23.3889	0	0
2019-05-03	93	67	78.7	33.8889	19.4444	25.9444	0	0
2019-05-04	79	55	67.9	26.1111	12.7778	19.9444	0	0
2019-05-05	85	52	67.5	29.4444	11.1111	19.7222	0	0
2019-05-06	87	50	70.5	30.5556	10	21.3889	0	0
2019-05-07	87	53	72.7	30.5556	11.6667	22.6111	0	0
2019-05-08	85	59	73	29.4444	15	22.7778	0	0
2019-05-09	80	64	72.7	26.6667	17.7778	22.6111	0	0
2019-05-10	83	72	76.1	28.3333	22.2222	24.5	0.05	0.127
2019-05-11	89	70	78	31.6667	21.1111	25.5556	0	0
2019-05-12	88	67	75.1	31.1111	19.4444	23.9444	0	0
2019-05-13	88	56	73	31.1111	13.3333	22.7778	0	0
2019-05-14	91	57	75.9	32.7778	13.8889	24.3889	0	0
2019-05-15	91	62	74.7	32.7778	16.6667	23.7222	0	0
2019-05-16	86	69	76.3	30	20.5556	24.6111	0	0
2019-05-17	86	71	76.5	30	21.6667	24.7222	0.03	0.0762
2019-05-18	91	75	80.6	32.7778	23.8889	27	0.09	0.2286
2019-05-19	95	76	81.5	35	24.4444	27.5	0	0
2019-05-20	83	68	73.8	28.3333	20	23.2222	0.52	1.3208
2019-05-21	78	64	71.2	25.5556	17.7778	21.7778	0.23	0.5842
2019-05-22	76	62	68	24.4444	16.6667	20	0.7	1.778
2019-05-23	86	62	70.2	30	16.6667	21.2222	0.02	0.0508
2019-05-24	87	57	71.3	30.5556	13.8889	21.8333	0.26	0.6604
2019-05-25	94	60	77.7	34.4444	15.5556	25.3889	0	0
2019-05-26	93	77	82.7	33.8889	25	28.1667	0	0
2019-05-27	97	78	84.4	36.1111	25.5556	29.1111	0	0
2019-05-28	93	68	78.6	33.8889	20	25.8889	0	0
2019-05-29	87	70	76.8	30.5556	21.1111	24.8889	1.07	2.7178
2019-05-30	88	68	77.5	31.1111	20	25.2778	0	0
2019-05-31	85	68	75.2	29.4444	20	24	0	0
2019-06-01	89	65	76.4	31.6667	18.3333	24.6667	0.02	0.0508
2019-06-02	92	72	80.1	33.3333	22.2222	26.7222	0.03	0.0762
2019-06-03	93	71	78.7	33.8889	21.6667	25.9444	0	0
2019-06-04	89	69	75.7	31.6667	20.5556	24.2778	1.04	2.6416
2019-06-05	90	68	75.7	32.2222	20	24.2778	0.01	0.0254
2019-06-06	90	70	80	32.2222	21.1111	26.6667	0.83	2.1082
2019-06-07	93	67	81	33.8889	19.4444	27.2222	0	0
2019-06-08	92	70	81.5	33.3333	21.1111	27.5	0	0
2019-06-09	91	73	79.8	32.7778	22.7778	26.5556	0	0
2019-06-10	92	68	80.6	33.3333	20	27	0	0
2019-06-11	93	71	80.9	33.8889	21.6667	27.1667	0	0
2019-06-12	94	72	81.6	34.4444	22.2222	27.5556	0	0
2019-06-13	95	74	83.2	35	23.3333	28.4444	0	0
2019-06-14	95	78	85.2	35	25.5556	29.5556	0.02	0.0508
2019-06-15	98	77	84.4	36.6667	25	29.1111	0	0
2019-06-16	98	77	84.9	36.6667	25	29.3889	0	0
2019-06-17	99	78	86.2	37.2222	25.5556	30.1111	0	0
2019-06-18	98	79	86.9	36.6667	26.1111	30.5	0	0
2019-06-19	91	75	81.3	32.7778	23.8889	27.3889	0	0
2019-06-20	96	74	85.1	35.5556	23.3333	29.5	0	0
2019-06-21	96	73	85.2	35.5556	22.7778	29.5556	0	0
2019-06-22	99	78	86	37.2222	25.5556	30	0	0
2019-06-23	102	77	87.6	38.8889	25	30.8889	0	0
2019-06-24	84	74	79.2	28.8889	23.3333	26.2222	0	0
2019-06-25	89	75	80.9	31.6667	23.8889	27.1667	0.06	0.1524
2019-06-26	91	73	80.1	32.7778	22.7778	26.7222	0.17	0.4318
2019-06-27	91	72	78.7	32.7778	22.2222	25.9444	0.27	0.6858
2019-06-28	93	70	79	33.8889	21.1111	26.1111	0	0
2019-06-29	97	74	83.8	36.1111	23.3333	28.7778	0	0
2019-06-30	98	80	87	36.6667	26.6667	30.5556	0	0
2019-07-01	96	80	86.3	35.5556	26.6667	30.1667	0	0
2019-07-02	98	79	85.5	36.6667	26.1111	29.7222	0	0
2019-07-03	97	76	85.6	36.1111	24.4444	29.7778	0	0
2019-07-04	99	76	85.4	37.2222	24.4444	29.6667	0	0
2019-07-05	98	75	84	36.6667	23.8889	28.8889	0	0
2019-07-06	98	74	82.6	36.6667	23.3333	28.1111	0	0
2019-07-07	97	73	82.3	36.1111	22.7778	27.9444	0.32	0.8128
2019-07-08	97	74	85.3	36.1111	23.3333	29.6111	0.52	1.3208
2019-07-09	97	74	86.5	36.1111	23.3333	30.2778	0	0
2019-07-10	97	74	85.9	36.1111	23.3333	29.9444	0	0
2019-07-11	97	75	84.1	36.1111	23.8889	28.9444	0	0
2019-07-12	96	73	84.8	35.5556	22.7778	29.3333	0	0
2019-07-13	98	73	84.3	36.6667	22.7778	29.0556	0	0
2019-07-14	99	73	85.3	37.2222	22.7778	29.6111	0	0
2019-07-15	102	73	82.9	38.8889	22.7778	28.2778	0	0
2019-07-16	96	71	82.3	35.5556	21.6667	27.9444	0.22	0.5588
2019-07-17	97	74	85	36.1111	23.3333	29.4444	0	0
2019-07-18	98	74	85.5	36.6667	23.3333	29.7222	0	0
2019-07-19	99	72	86.7	37.2222	22.2222	30.3889	0	0
2019-07-20	101	76	88	38.3333	24.4444	31.1111	0	0
2019-07-21	100	74	88.2	37.7778	23.3333	31.2222	0	0
2019-07-22	100	76	87.6	37.7778	24.4444	30.8889	0	0
2019-07-23	99	76	86.3	37.2222	24.4444	30.1667	0	0
2019-07-24	99	77	84.9	37.2222	25	29.3889	0	0
2019-07-25	100	78	87.3	37.7778	25.5556	30.7222	0	0
2019-07-26	101	77	85.9	38.3333	25	29.9444	0	0
2019-07-27	100	71	87	37.7778	21.6667	30.5556	0	0
2019-07-28	102	73	88	38.8889	22.7778	31.1111	0	0
2019-07-29	105	75	91.4	40.5556	23.8889	33	0	0
2019-07-30	104	77	89.8	40	25	32.1111	0	0
2019-07-31	99	78	87.2	37.2222	25.5556	30.6667	0	0
2019-08-01	98	69	85.4	36.6667	20.5556	29.6667	0	0
2019-08-02	88	78	82.2	31.1111	25.5556	27.8889	0	0
2019-08-03	94	76	81.6	34.4444	24.4444	27.5556	0.05	0.127
2019-08-04	96	73	85.6	35.5556	22.7778	29.7778	0	0
2019-08-05	101	74	86	38.3333	23.3333	30	0	0
2019-08-06	101	78	86.9	38.3333	25.5556	30.5	0	0
2019-08-07	85	72	76.2	29.4444	22.2222	24.5556	1.88	4.7752
2019-08-08	93	73	82.7	33.8889	22.7778	28.1667	0.99	2.5146
2019-08-09	96	74	83	35.5556	23.3333	28.3333	0	0
2019-08-10	97	73	85.3	36.1111	22.7778	29.6111	0	0
2019-08-11	98	74	86.8	36.6667	23.3333	30.4444	0	0
2019-08-12	99	77	86	37.2222	25	30	0	0
2019-08-13	99	77	86.9	37.2222	25	30.5	0	0
2019-08-14	98	78	86.8	36.6667	25.5556	30.4444	0	0
2019-08-15	98	77	85.8	36.6667	25	29.8889	0	0
2019-08-16	99	80	86.3	37.2222	26.6667	30.1667	0	0
2019-08-17	99	81	87.6	37.2222	27.2222	30.8889	0	0
2019-08-18	99	77	86.8	37.2222	25	30.4444	0	0
2019-08-19	99	73	87.3	37.2222	22.7778	30.7222	0	0
2019-08-20	98	76	87.3	36.6667	24.4444	30.7222	0	0
2019-08-21	96	74	84.5	35.5556	23.3333	29.1667	0	0
2019-08-22	98	71	86	36.6667	21.6667	30	0	0
2019-08-23	98	72	84.3	36.6667	22.2222	29.0556	0	0
2019-08-24	94	76	82.2	34.4444	24.4444	27.8889	0	0
2019-08-25	90	77	82.1	32.2222	25	27.8333	0	0
2019-08-26	77	74	75.9	25	23.3333	24.3889	1.24	3.1496
2019-08-27	76	72	73.7	24.4444	22.2222	23.1667	7	17.78
2019-08-28	84	70	76	28.8889	21.1111	24.4444	1.83	4.6482
2019-08-29	88	72	79.1	31.1111	22.2222	26.1667	0	0
2019-08-30	91	71	79.9	32.7778	21.6667	26.6111	0	0
2019-08-31	92	66	78.7	33.3333	18.8889	25.9444	0	0
2019-09-01	93	68	79.5	33.8889	20	26.3889	0	0
2019-09-02	93	66	79.2	33.8889	18.8889	26.2222	0	0
2019-09-03	91	68	79.3	32.7778	20	26.2778	0	0
2019-09-04	91	67	78.4	32.7778	19.4444	25.7778	0	0
2019-09-05	94	69	81.6	34.4444	20.5556	27.5556	0	0
2019-09-06	86	60	77	30	15.5556	25	0	0
2019-09-07	84	54	69.7	28.8889	12.2222	20.9444	0	0
2019-09-08	85	56	71	29.4444	13.3333	21.6667	0	0
2019-09-09	86	60	72.9	30	15.5556	22.7222	0	0
2019-09-10	87	60	72.1	30.5556	15.5556	22.2778	0	0
2019-09-11	86	59	71.5	30	15	21.9444	0	0
2019-09-12	92	57	74.2	33.3333	13.8889	23.4444	0	0
2019-09-13	92	61	75.4	33.3333	16.1111	24.1111	0	0
2019-09-14	94	67	78.4	34.4444	19.4444	25.7778	0	0
2019-09-15	92	67	77.1	33.3333	19.4444	25.0556	0	0
2019-09-16	92	75	80.9	33.3333	23.8889	27.1667	0	0
2019-09-17	92	72	79.3	33.3333	22.2222	26.2778	0	0
2019-09-18	94	71	81.3	34.4444	21.6667	27.3889	0	0
2019-09-19	93	76	83.4	33.8889	24.4444	28.5556	0	0
2019-09-20	94	77	84.2	34.4444	25	29	0	0
2019-09-21	94	75	81.7	34.4444	23.8889	27.6111	0	0
2019-09-22	91	73	79.3	32.7778	22.7778	26.2778	0	0
2019-09-23	91	68	78	32.7778	20	25.5556	0	0
2019-09-24	91	69	78.5	32.7778	20.5556	25.8333	0	0
2019-09-25	90	68	78.1	32.2222	20	25.6111	0	0
2019-09-26	83	73	75.8	28.3333	22.7778	24.3333	0.02	0.0508
2019-09-27	85	74	78.5	29.4444	23.3333	25.8333	2.49	6.3246
2019-09-28	86	73	77.3	30	22.7778	25.1667	0.01	0.0254
2019-09-29	78	71	73.8	25.5556	21.6667	23.2222	0.98	2.4892
2019-09-30	86	65	74	30	18.3333	23.3333	0.31	0.7874
2019-10-01	88	61	73.3	31.1111	16.1111	22.9444	0	0
2019-10-02	89	66	76.7	31.6667	18.8889	24.8333	0	0
2019-10-03	86	74	77.7	30	23.3333	25.3889	0	0
2019-10-04	88	74	80.5	31.1111	23.3333	26.9444	0.94	2.3876
2019-10-05	88	69	77.1	31.1111	20.5556	25.0556	0	0
2019-10-06	87	66	75.7	30.5556	18.8889	24.2778	0	0
2019-10-07	88	65	76.9	31.1111	18.3333	24.9444	0	0
2019-10-08	90	67	79.1	32.2222	19.4444	26.1667	0	0
2019-10-09	91	71	79.5	32.7778	21.6667	26.3889	0	0
2019-10-10	77	61	67.8	25	16.1111	19.8889	0	0
2019-10-11	77	58	66	25	14.4444	18.8889	0	0
2019-10-12	86	58	71.6	30	14.4444	22	0	0
2019-10-13	89	66	75.4	31.6667	18.8889	24.1111	0	0
2019-10-14	89	72	77.5	31.6667	22.2222	25.2778	0	0
2019-10-15	77	63	71.6	25	17.2222	22	0	0
2019-10-16	75	49	62.3	23.8889	9.44444	16.8333	0	0
2019-10-17	77	43	57.8	25	6.11111	14.3333	0	0
2019-10-18	81	41	59.5	27.2222	5	15.2778	0	0
2019-10-19	82	50	66.6	27.7778	10	19.2222	0	0
2019-10-20	82	61	70.9	27.7778	16.1111	21.6111	0	0
2019-10-21	89	72	77.5	31.6667	22.2222	25.2778	0.01	0.0254
2019-10-22	77	53	68.3	25	11.6667	20.1667	0	0
2019-10-23	80	47	61.5	26.6667	8.33333	16.3889	0.7	1.778
2019-10-24	77	47	63.5	25	8.33333	17.5	0	0
2019-10-25	80	41	60.1	26.6667	5	15.6111	0	0
2019-10-26	82	48	64.1	27.7778	8.88889	17.8333	0	0
2019-10-27	62	45	56.5	16.6667	7.22222	13.6111	0	0
2019-10-28	62	39	47.8	16.6667	3.88889	8.77778	0	0
2019-10-29	74	32	52.8	23.3333	0	11.5556	0	0
2019-10-30	79	39	58.7	26.1111	3.88889	14.8333	0	0
2019-10-31	61	51	55.3	16.1111	10.5556	12.9444	0	0
2019-11-01	77	53	59.8	25	11.6667	15.4444	0.85	2.159
2019-11-02	84	66	73.2	28.8889	18.8889	22.8889	0	0
2019-11-03	87	71	76.6	30.5556	21.6667	24.7778	0	0
2019-11-04	80	70	74.1	26.6667	21.1111	23.3889	0	0
2019-11-05	88	70	75.2	31.1111	21.1111	24	0.01	0.0254
2019-11-06	86	69	74.6	30	20.5556	23.6667	0	0
2019-11-07	81	60	69.7	27.2222	15.5556	20.9444	0	0
2019-11-08	60	46	50.7	15.5556	7.77778	10.3889	0	0
2019-11-09	56	47	51	13.3333	8.33333	10.5556	0.21	0.5334
2019-11-10	63	52	56	17.2222	11.1111	13.3333	0	0
2019-11-11	74	57	66.6	23.3333	13.8889	19.2222	0	0
2019-11-12	76	60	67.8	24.4444	15.5556	19.8889	0	0
2019-11-13	77	61	68.5	25	16.1111	20.2778	0	0
2019-11-14	79	55	66.6	26.1111	12.7778	19.2222	0	0
2019-11-15	73	66	68.9	22.7778	18.8889	20.5	0	0
2019-11-16	82	62	70.5	27.7778	16.6667	21.3889	0.07	0.1778
2019-11-17	84	69	74.1	28.8889	20.5556	23.3889	0.01	0.0254
2019-11-18	83	54	70.1	28.3333	12.2222	21.1667	0	0
2019-11-19	64	39	51.5	17.7778	3.88889	10.8333	0	0
2019-11-20	69	37	51.5	20.5556	2.77778	10.8333	0	0
2019-11-21	74	45	59.5	23.3333	7.22222	15.2778	0	0
2019-11-22	65	36	53.4	18.3333	2.22222	11.8889	0	0
2019-11-23	69	31	48.3	20.5556	-0.555556	9.05556	0	0
2019-11-24	75	36	54	23.8889	2.22222	12.2222	0	0
2019-11-25	80	40	58.5	26.6667	4.44444	14.7222	0	0
2019-11-26	75	49	59.2	23.8889	9.44444	15.1111	0	0
2019-11-27	75	44	58.3	23.8889	6.66667	14.6111	0	0
2019-11-28	79	42	54.3	26.1111	5.55556	12.3889	0	0
2019-11-29	72	43	57.9	22.2222	6.11111	14.3889	0	0
2019-11-30	74	41	56.5	23.3333	5	13.6111	0	0
2019-12-01	75	45	58.5	23.8889	7.22222	14.7222	0	0
2019-12-02	77	43	60.3	25	6.11111	15.7222	0	0
2019-12-03	73	55	65.1	22.7778	12.7778	18.3889	0	0
2019-12-04	83	68	73.1	28.3333	20	22.8333	0.02	0.0508
2019-12-05	71	45	58.7	21.6667	7.22222	14.8333	0	0
2019-12-06	43	40	41.5	6.11111	4.44444	5.27778	0.22	0.5588
2019-12-07	46	32	39.3	7.77778	0	4.05556	0.8	2.032
2019-12-08	47	30	36	8.33333	-1.11111	2.22222	0.35	0.889
2019-12-09	67	29	45.7	19.4444	-1.66667	7.61111	0	0
2019-12-10	67	31	47.8	19.4444	-0.555556	8.77778	0	0
2019-12-11	77	32	53.1	25	0	11.7222	0	0
2019-12-12	64	36	50.7	17.7778	2.22222	10.3889	0	0
2019-12-13	62	29	44.8	16.6667	-1.66667	7.11111	0	0
2019-12-14	63	39	51.8	17.2222	3.88889	11	0	0
2019-12-15	59	37	49.4	15	2.77778	9.66667	0	0
2019-12-16	53	35	44.6	11.6667	1.66667	7	0	0
2019-12-17	57	45	49.3	13.8889	7.22222	9.61111	1.29	3.2766
2019-12-18	57	49	53.5	13.8889	9.44444	11.9444	0	0
2019-12-19	72	57	63.5	22.2222	13.8889	17.5	0.54	1.3716
2019-12-20	75	46	57.5	23.8889	7.77778	14.1667	0.35	0.889
2019-12-21	78	42	62.2	25.5556	5.55556	16.7778	0	0
2019-12-22	73	42	58.7	22.7778	5.55556	14.8333	0	0
2019-12-23	55	33	43.6	12.7778	0.555556	6.44444	0.05	0.127
2019-12-24	63	30	43.2	17.2222	-1.11111	6.22222	0	0
2019-12-25	55	29	44.2	12.7778	-1.66667	6.77778	0	0
2019-12-26	51	41	46.4	10.5556	5	8	0.01	0.0254
2019-12-27	40	38	39.1	4.44444	3.33333	3.94444	0.02	0.0508
2019-12-28	48	38	42.4	8.88889	3.33333	5.77778	0	0
2019-12-29	49	40	44.1	9.44444	4.44444	6.72222	0	0
2019-12-30	63	44	52.4	17.2222	6.66667	11.3333	0	0
2019-12-31	43	27	35.2	6.11111	-2.77778	1.77778	0	0

## Sheet: 2016
Date	Max Temp (°F)	Min Temp (°F)	Avg Temp (°F)	Max Temp (°C)	Min Temp (°C)	Avg Temp (°C)	Total Precipitation (in.)	Total Precipitation (cm)
2019-01-01	49	44	46.3	9.44444	6.66667	7.94444	0	0
2019-01-02	48	43	45	8.88889	6.11111	7.22222	0	0
2019-01-03	61	35	47.7	16.1111	1.66667	8.72222	0.22	0.5588
2019-01-04	57	33	42.7	13.8889	0.555556	5.94444	0	0
2019-01-05	57	30	44.9	13.8889	-1.11111	7.16667	0	0
2019-01-06	53	47	50.6	11.6667	8.33333	10.3333	0.01	0.0254
2019-01-07	71	48	54.4	21.6667	8.88889	12.4444	0.63	1.6002
2019-01-08	65	37	50	18.3333	2.77778	10	0	0
2019-01-09	59	39	49	15	3.88889	9.44444	0	0
2019-01-10	49	33	40.1	9.44444	0.555556	4.5	0	0
2019-01-11	55	31	40.2	12.7778	-0.555556	4.55556	0	0
2019-01-12	65	32	46	18.3333	0	7.77778	0	0
2019-01-13	65	32	47.8	18.3333	0	8.77778	0	0
2019-01-14	70	44	55.9	21.1111	6.66667	13.2778	0	0
2019-01-15	69	39	54.9	20.5556	3.88889	12.7222	0	0
2019-01-16	64	37	47.3	17.7778	2.77778	8.5	0	0
2019-01-17	56	28	41.4	13.3333	-2.22222	5.22222	0.01	0.0254
2019-01-18	57	30	42.7	13.8889	-1.11111	5.94444	0	0
2019-01-19	69	33	49.7	20.5556	0.555556	9.83333	0	0
2019-01-20	56	45	51.3	13.3333	7.22222	10.7222	0	0
2019-01-21	65	44	54.2	18.3333	6.66667	12.3333	0	0
2019-01-22	54	28	43.4	12.2222	-2.22222	6.33333	0.01	0.0254
2019-01-23	58	28	40.8	14.4444	-2.22222	4.88889	0	0
2019-01-24	69	29	50.6	20.5556	-1.66667	10.3333	0	0
2019-01-25	72	51	60.9	22.2222	10.5556	16.0556	0	0
2019-01-26	56	43	49.3	13.3333	6.11111	9.61111	0	0
2019-01-27	58	33	44.8	14.4444	0.555556	7.11111	0.16	0.4064
2019-01-28	72	29	47.1	22.2222	-1.66667	8.38889	0	0
2019-01-29	74	32	53.5	23.3333	0	11.9444	0	0
2019-01-30	77	41	59.3	25	5	15.1667	0	0
2019-01-31	80	51	65	26.6667	10.5556	18.3333	0	0
2019-02-01	78	61.2	47	25.5556	16.2222	8.33333	0	0
2019-02-02	71	59.9	45	21.6667	15.5	7.22222	0	0
2019-02-03	58	46.2	31	14.4444	7.88889	-0.555556	0	0
2019-02-04	57	42.7	30	13.8889	5.94444	-1.11111	0	0
2019-02-05	60	45.1	23	15.5556	7.27778	-5	0	0
2019-02-06	60	48.9	34	15.5556	9.38889	1.11111	0	0
2019-02-07	66	46	29	18.8889	7.77778	-1.66667	0	0
2019-02-08	64	51.6	37	17.7778	10.8889	2.77778	0	0
2019-02-09	72	52.2	39	22.2222	11.2222	3.88889	0	0
2019-02-10	73	52.6	32	22.7778	11.4444	0	0	0
2019-02-11	80	61.8	42	26.6667	16.5556	5.55556	0	0
2019-02-12	78	58.8	36	25.5556	14.8889	2.22222	0	0
2019-02-13	74	59.4	45	23.3333	15.2222	7.22222	0	0
2019-02-14	75	62.1	52	23.8889	16.7222	11.1111	0	0
2019-02-15	74	60.6	44	23.3333	15.8889	6.66667	0	0
2019-02-16	81	59.9	38	27.2222	15.5	3.33333	0	0
2019-02-17	75	58.4	39	23.8889	14.6667	3.88889	0	0
2019-02-18	79	61.9	48	26.1111	16.6111	8.88889	0	0
2019-02-19	81	69.8	64	27.2222	21	17.7778	0	0
2019-02-20	76	69.3	66	24.4444	20.7222	18.8889	0	0
2019-02-21	72	67.5	64	22.2222	19.7222	17.7778	0	0
2019-02-22	70	63.3	59	21.1111	17.3889	15	0	0
2019-02-23	61	56.4	48	16.1111	13.5556	8.88889	1.14	2.8956
2019-02-24	65	52.1	42	18.3333	11.1667	5.55556	0	0
2019-02-25	69	50.7	31	20.5556	10.3889	-0.555556	0	0
2019-02-26	63	49	35	17.2222	9.44444	1.66667	0	0
2019-02-27	71	55	35	21.6667	12.7778	1.66667	0	0
2019-02-28	76	60.7	51	24.4444	15.9444	10.5556	0	0
29-Feb	78	67.5	63	25.5556	19.7222	17.2222	0	0
2019-03-01	81	52	68.3	27.2222	11.1111	20.1667	0	0
2019-03-02	75	40	61.1	23.8889	4.44444	16.1667	0	0
2019-03-03	82	50	69	27.7778	10	20.5556	0	0
2019-03-04	75	39	57.4	23.8889	3.88889	14.1111	0	0
2019-03-05	77	55	63.4	25	12.7778	17.4444	0	0
2019-03-06	76	53	64.5	24.4444	11.6667	18.0556	0	0
2019-03-07	77	64	69.9	25	17.7778	21.0556	0	0
2019-03-08	82	68	72.3	27.7778	20	22.3889	0.03	0.0762
2019-03-09	70	60	61.2	21.1111	15.5556	16.2222	1.46	3.7084
2019-03-10	65	59	61.9	18.3333	15	16.6111	1.43	3.6322
2019-03-11	73	60	64.8	22.7778	15.5556	18.2222	0.23	0.5842
2019-03-12	73	56	62.5	22.7778	13.3333	16.9444	0.03	0.0762
2019-03-13	84	55	66.5	28.8889	12.7778	19.1667	0	0
2019-03-14	88	47	69.3	31.1111	8.33333	20.7222	0	0
2019-03-15	85	66	72.3	29.4444	18.8889	22.3889	0	0
2019-03-16	78	55	67.7	25.5556	12.7778	19.8333	0	0
2019-03-17	79	66	70.4	26.1111	18.8889	21.3333	0	0
2019-03-18	78	58	69.3	25.5556	14.4444	20.7222	0.01	0.0254
2019-03-19	62	45	54.6	16.6667	7.22222	12.5556	0.06	0.1524
2019-03-20	62	39	49.7	16.6667	3.88889	9.83333	0	0
2019-03-21	66	33	49	18.8889	0.555556	9.44444	0	0
2019-03-22	77	38	59.7	25	3.33333	15.3889	0	0
2019-03-23	79	65	69.8	26.1111	18.3333	21	0	0
2019-03-24	69	46	60.2	20.5556	7.77778	15.6667	0.51	1.2954
2019-03-25	73	39	55	22.7778	3.88889	12.7778	0	0
2019-03-26	73	41	55.8	22.7778	5	13.2222	0	0
2019-03-27	73	51	62.9	22.7778	10.5556	17.1667	0	0
2019-03-28	73	44	58.4	22.7778	6.66667	14.6667	0.01	0.0254
2019-03-29	70	55	64.8	21.1111	12.7778	18.2222	0	0
2019-03-30	76	69	71.6	24.4444	20.5556	22	0.03	0.0762
2019-03-31	85	62	73.5	29.4444	16.6667	23.0556	0.01	0.0254
2019-04-01	63	47	57.5	17.2222	8.33333	14.1667	0	0
2019-04-02	73	42	56.3	22.7778	5.55556	13.5	0.16	0.4064
2019-04-03	76	40	58	24.4444	4.44444	14.4444	0	0
2019-04-04	81	49	64.6	27.2222	9.44444	18.1111	0	0
2019-04-05	80	43	64.3	26.6667	6.11111	17.9444	0	0
2019-04-06	80	48	65.5	26.6667	8.88889	18.6111	0	0
2019-04-07	83	43	62.9	28.3333	6.11111	17.1667	0	0
2019-04-08	80	51	65.3	26.6667	10.5556	18.5	0	0
2019-04-09	77	54	65.4	25	12.2222	18.5556	0	0
2019-04-10	79	64	70	26.1111	17.7778	21.1111	0	0
2019-04-11	86	69	74.7	30	20.5556	23.7222	0	0
2019-04-12	70	63	66.2	21.1111	17.2222	19	0	0
2019-04-13	71	61	63.9	21.6667	16.1111	17.7222	2.08	5.2832
2019-04-14	74	53	62.9	23.3333	11.6667	17.1667	0	0
2019-04-15	78	51	63.3	25.5556	10.5556	17.3889	0	0
2019-04-16	75	64	70.2	23.8889	17.7778	21.2222	0	0
2019-04-17	77	66	71	25	18.8889	21.6667	0.2	0.508
2019-04-18	73	62	68.3	22.7778	16.6667	20.1667	1.1	2.794
2019-04-19	79	62	68.2	26.1111	16.6667	20.1111	0.46	1.1684
2019-04-20	79	61	67	26.1111	16.1111	19.4444	0	0
2019-04-21	81	61	67	27.2222	16.1111	19.4444	0.42	1.0668
2019-04-22	81	57	68.9	27.2222	13.8889	20.5	0.5	1.27
2019-04-23	81	53	68.2	27.2222	11.6667	20.1111	0	0
2019-04-24	77	61	69.8	25	16.1111	21	0	0
2019-04-25	87	70	76.7	30.5556	21.1111	24.8333	0	0
2019-04-26	85	72	77.6	29.4444	22.2222	25.3333	0	0
2019-04-27	89	61	72.7	31.6667	16.1111	22.6111	0.44	1.1176
2019-04-28	86	59	73.5	30	15	23.0556	0	0
2019-04-29	84	75	78.9	28.8889	23.8889	26.0556	0	0
2019-04-30	83	63	72.5	28.3333	17.2222	22.5	1.12	2.8448
2019-05-01	77	64	70.2	25	17.7778	21.2222	0	0
2019-05-02	68	58	62.6	20	14.4444	17	0.14	0.3556
2019-05-03	76	54	64.4	24.4444	12.2222	18	0	0
2019-05-04	85	52	67.5	29.4444	11.1111	19.7222	0	0
2019-05-05	85	53	69.7	29.4444	11.6667	20.9444	0	0
2019-05-06	84	54	69.3	28.8889	12.2222	20.7222	0	0
2019-05-07	85	53	70	29.4444	11.6667	21.1111	0	0
2019-05-08	73	65	70.4	22.7778	18.3333	21.3333	0	0
2019-05-09	87	65	76.1	30.5556	18.3333	24.5	0.05	0.127
2019-05-10	90	67	79.5	32.2222	19.4444	26.3889	0	0
2019-05-11	86	65	74.1	30	18.3333	23.3889	0.63	1.6002
2019-05-12	84	70	76	28.8889	21.1111	24.4444	0	0
2019-05-13	87	69	77.8	30.5556	20.5556	25.4444	0	0
2019-05-14	81	65	71.6	27.2222	18.3333	22	0	0
2019-05-15	73	62	68.2	22.7778	16.6667	20.1111	0.74	1.8796
2019-05-16	80	67	71.1	26.6667	19.4444	21.7222	0.92	2.3368
2019-05-17	81	66	71.1	27.2222	18.8889	21.7222	0	0
2019-05-18	78	64	67.9	25.5556	17.7778	19.9444	0.39	0.9906
2019-05-19	74	62	65.3	23.3333	16.6667	18.5	0.34	0.8636
2019-05-20	81	60	69.4	27.2222	15.5556	20.7778	2.41	6.1214
2019-05-21	83	67	76	28.3333	19.4444	24.4444	0	0
2019-05-22	88	72	78.2	31.1111	22.2222	25.6667	0	0
2019-05-23	84	72	77.4	28.8889	22.2222	25.2222	0	0
2019-05-24	87	75	79.1	30.5556	23.8889	26.1667	0.01	0.0254
2019-05-25	86	75	80.4	30	23.8889	26.8889	0	0
2019-05-26	88	67	76.6	31.1111	19.4444	24.7778	0	0
2019-05-27	76	65	70.3	24.4444	18.3333	21.2778	8.94	22.7076
2019-05-28	90	64	74.8	32.2222	17.7778	23.7778	0.13	0.3302
2019-05-29	89	72	78.5	31.6667	22.2222	25.8333	0.19	0.4826
2019-05-30	87	67	76.6	30.5556	19.4444	24.7778	0.05	0.127
2019-05-31	83	68	74.3	28.3333	20	23.5	0.21	0.5334
2019-06-01	87	66	73.3	30.5556	18.8889	22.9444	0.67	1.7018
2019-06-02	83	69	74.5	28.3333	20.5556	23.6111	0.19	0.4826
2019-06-03	85	66	74.4	29.4444	18.8889	23.5556	0.29	0.7366
2019-06-04	85	67	73.6	29.4444	19.4444	23.1111	1.54	3.9116
2019-06-05	88	68	77.1	31.1111	20	25.0556	0.03	0.0762
2019-06-06	89	65	78.1	31.6667	18.3333	25.6111	0	0
2019-06-07	91	67	79.8	32.7778	19.4444	26.5556	0	0
2019-06-08	92	69	78.8	33.3333	20.5556	26	0	0
2019-06-09	91	68	78.9	32.7778	20	26.0556	0	0
2019-06-10	92	67	79.5	33.3333	19.4444	26.3889	0	0
2019-06-11	93	76	82.3	33.8889	24.4444	27.9444	0	0
2019-06-12	93	77	83.1	33.8889	25	28.3889	0	0
2019-06-13	94	77	84.3	34.4444	25	29.0556	0	0
2019-06-14	93	78	84.2	33.8889	25.5556	29	0	0
2019-06-15	96	77	84.7	35.5556	25	29.2778	0	0
2019-06-16	95	75	82.8	35	23.8889	28.2222	0	0
2019-06-17	95	75	82.8	35	23.8889	28.2222	0	0
2019-06-18	95	76	84.5	35	24.4444	29.1667	0	0
2019-06-19	92	75	82.5	33.3333	23.8889	28.0556	0	0
2019-06-20	94	71	82.8	34.4444	21.6667	28.2222	0	0
2019-06-21	94	73	84	34.4444	22.7778	28.8889	0	0
2019-06-22	94	74	84.5	34.4444	23.3333	29.1667	0	0
2019-06-23	93	73	82.2	33.8889	22.7778	27.8889	0	0
2019-06-24	93	72	81.2	33.8889	22.2222	27.3333	0	0
2019-06-25	87	76	79.9	30.5556	24.4444	26.6111	0	0
2019-06-26	94	74	82.3	34.4444	23.3333	27.9444	0.02	0.0508
2019-06-27	95	71	82.4	35	21.6667	28	0	0
2019-06-28	99	74	81.6	37.2222	23.3333	27.5556	0	0
2019-06-29	94	71	82.2	34.4444	21.6667	27.8889	0.56	1.4224
2019-06-30	94	73	83.8	34.4444	22.7778	28.7778	0	0
2019-07-01	95	71	83.9	35	21.6667	28.8333	0	0
2019-07-02	96	74	84.7	35.5556	23.3333	29.2778	0	0
2019-07-03	97	78	85.3	36.1111	25.5556	29.6111	0	0
2019-07-04	98	80	86.7	36.6667	26.6667	30.3889	0	0
2019-07-05	98	79	86	36.6667	26.1111	30	0	0
2019-07-06	98	79	85.2	36.6667	26.1111	29.5556	0	0
2019-07-07	98	78	85.2	36.6667	25.5556	29.5556	0	0
2019-07-08	98	79	86.1	36.6667	26.1111	30.0556	0	0
2019-07-09	98	77	85.5	36.6667	25	29.7222	0	0
2019-07-10	96	78	84.7	35.5556	25.5556	29.2778	0	0
2019-07-11	98	79	85.9	36.6667	26.1111	29.9444	0	0
2019-07-12	98	77	84.7	36.6667	25	29.2778	0	0
2019-07-13	98	79	86.1	36.6667	26.1111	30.0556	0	0
2019-07-14	99	77	84.9	37.2222	25	29.3889	0	0
2019-07-15	99	77	86.7	37.2222	25	30.3889	0	0
2019-07-16	97	74	84.4	36.1111	23.3333	29.1111	0	0
2019-07-17	97	73	82.7	36.1111	22.7778	28.1667	0	0
2019-07-18	96	72	84.8	35.5556	22.2222	29.3333	0	0
2019-07-19	97	74	85.3	36.1111	23.3333	29.6111	0	0
2019-07-20	99	73	84.3	37.2222	22.7778	29.0556	0	0
2019-07-21	99	71	86.3	37.2222	21.6667	30.1667	0	0
2019-07-22	100	72	87.4	37.7778	22.2222	30.7778	0	0
2019-07-23	100	75	86	37.7778	23.8889	30	0	0
2019-07-24	99	78	88	37.2222	25.5556	31.1111	0	0
2019-07-25	100	77	85	37.7778	25	29.4444	0	0
2019-07-26	91	75	79.6	32.7778	23.8889	26.4444	0.34	0.8636
2019-07-27	91	72	77.1	32.7778	22.2222	25.0556	1.15	2.921
2019-07-28	95	73	78.7	35	22.7778	25.9444	4.16	10.5664
2019-07-29	94	74	83.2	34.4444	23.3333	28.4444	0	0
2019-07-30	95	74	82.8	35	23.3333	28.2222	0	0
2019-07-31	96	76	83.7	35.5556	24.4444	28.7222	0	0
2019-08-01	97	73	84.4	36.1111	22.7778	29.1111	0	0
2019-08-02	96	71	83	35.5556	21.6667	28.3333	0	0
2019-08-03	96	74	85.3	35.5556	23.3333	29.6111	0	0
2019-08-04	96	72	83.2	35.5556	22.2222	28.4444	0	0
2019-08-05	97	73	85.5	36.1111	22.7778	29.7222	0	0
2019-08-06	97	74	84.1	36.1111	23.3333	28.9444	0	0
2019-08-07	97	77	86.2	36.1111	25	30.1111	0	0
2019-08-08	98	74	86.3	36.6667	23.3333	30.1667	0	0
2019-08-09	98	77	84.9	36.6667	25	29.3889	0	0
2019-08-10	99	79	86.7	37.2222	26.1111	30.3889	0	0
2019-08-11	99	77	86.4	37.2222	25	30.2222	0	0
2019-08-12	101	77	86.4	38.3333	25	30.2222	0	0
2019-08-13	91	77	81.5	32.7778	25	27.5	0.19	0.4826
2019-08-14	86	72	77	30	22.2222	25	0.03	0.0762
2019-08-15	78	71	74	25.5556	21.6667	23.3333	1.3	3.302
2019-08-16	80	72	74.9	26.6667	22.2222	23.8333	1.4	3.556
2019-08-17	83	75	77.4	28.3333	23.8889	25.2222	1.87	4.7498
2019-08-18	87	75	77.9	30.5556	23.8889	25.5	0.04	0.1016
2019-08-19	93	74	81.5	33.8889	23.3333	27.5	0.28	0.7112
2019-08-20	83	72	77.5	28.3333	22.2222	25.2778	0	0
2019-08-21	81	73	76.2	27.2222	22.7778	24.5556	2.57	6.5278
2019-08-22	92	75	79.3	33.3333	23.8889	26.2778	0.01	0.0254
2019-08-23	93	77	82.9	33.8889	25	28.2778	0.06	0.1524
2019-08-24	92	73	81.3	33.3333	22.7778	27.3889	0	0
2019-08-25	92	74	80.6	33.3333	23.3333	27	0	0
2019-08-26	92	73	80.9	33.3333	22.7778	27.1667	0	0
2019-08-27	91	72	81.4	32.7778	22.2222	27.4444	0	0
2019-08-28	91	71	80.3	32.7778	21.6667	26.8333	0	0
2019-08-29	90	73	78.1	32.2222	22.7778	25.6111	0	0
2019-08-30	90	73	79.8	32.2222	22.7778	26.5556	0.56	1.4224
2019-08-31	93	73	82.6	33.8889	22.7778	28.1111	0	0
2019-09-01	93	73	83.1	33.8889	22.7778	28.3889	0	0
2019-09-02	90	74	80.3	32.2222	23.3333	26.8333	0	0
2019-09-03	90	72	79.8	32.2222	22.2222	26.5556	0.12	0.3048
2019-09-04	91	72	80.5	32.7778	22.2222	26.9444	0	0
2019-09-05	90	72	78.5	32.2222	22.2222	25.8333	0	0
2019-09-06	92	71	80.3	33.3333	21.6667	26.8333	0.03	0.0762
2019-09-07	93	77	82.7	33.8889	25	28.1667	0.63	1.6002
2019-09-08	92	76	80.9	33.3333	24.4444	27.1667	0	0
2019-09-09	92	75	81.5	33.3333	23.8889	27.5	0	0
2019-09-10	91	72	78.7	32.7778	22.2222	25.9444	0	0
2019-09-11	90	69	79.3	32.2222	20.5556	26.2778	0.22	0.5588
2019-09-12	91	68	79.5	32.7778	20	26.3889	0	0
2019-09-13	92	70	80.6	33.3333	21.1111	27	0	0
2019-09-14	91	74	82.3	32.7778	23.3333	27.9444	0	0
2019-09-15	92	71	81	33.3333	21.6667	27.2222	0	0
2019-09-16	93	71	81.3	33.8889	21.6667	27.3889	0	0
2019-09-17	95	72	82.7	35	22.2222	28.1667	0	0
2019-09-18	96	74	84	35.5556	23.3333	28.8889	0	0
2019-09-19	96	74	83.1	35.5556	23.3333	28.3889	0	0
2019-09-20	96	71	81.8	35.5556	21.6667	27.6667	0	0
2019-09-21	93	71	81.8	33.8889	21.6667	27.6667	0	0
2019-09-22	93	68	80.2	33.8889	20	26.7778	0	0
2019-09-23	91	73	80.4	32.7778	22.7778	26.8889	0	0
2019-09-24	92	73	79.5	33.3333	22.7778	26.3889	0.01	0.0254
2019-09-25	83	72	76.1	28.3333	22.2222	24.5	0.05	0.127
2019-09-26	76	67	72.1	24.4444	19.4444	22.2778	1.91	4.8514
2019-09-27	79	66	71.5	26.1111	18.8889	21.9444	0.2	0.508
2019-09-28	88	63	72.8	31.1111	17.2222	22.6667	0	0
2019-09-29	86	58	70.1	30	14.4444	21.1667	0	0
2019-09-30	80	54	65.9	26.6667	12.2222	18.8333	0	0
2019-10-01	80	56	67.5	26.6667	13.3333	19.7222	0	0
2019-10-02	85	54	68.2	29.4444	12.2222	20.1111	0	0
2019-10-03	87	59	72	30.5556	15	22.2222	0	0
2019-10-04	91	63	75.1	32.7778	17.2222	23.9444	0	0
2019-10-05	91	69	79.3	32.7778	20.5556	26.2778	0	0
2019-10-06	91	74	80	32.7778	23.3333	26.6667	0	0
2019-10-07	88	65	75.3	31.1111	18.3333	24.0556	0	0
2019-10-08	84	61	70.6	28.8889	16.1111	21.4444	0	0
2019-10-09	82	53	66.2	27.7778	11.6667	19	0	0
2019-10-10	82	48	62.9	27.7778	8.88889	17.1667	0	0
2019-10-11	87	50	67.7	30.5556	10	19.8333	0	0
2019-10-12	90	59	74.4	32.2222	15	23.5556	0	0
2019-10-13	88	67	74.2	31.1111	19.4444	23.4444	0	0
2019-10-14	86	68	72.7	30	20	22.6111	0.25	0.635
2019-10-15	91	66	76.8	32.7778	18.8889	24.8889	0	0
2019-10-16	91	73	79.4	32.7778	22.7778	26.3333	0	0
2019-10-17	93	72	79.2	33.8889	22.2222	26.2222	0	0
2019-10-18	91	74	79.7	32.7778	23.3333	26.5	0	0
2019-10-19	90	74	80.3	32.2222	23.3333	26.8333	0	0
2019-10-20	83	67	73.4	28.3333	19.4444	23	0	0
2019-10-21	75	50	62.5	23.8889	10	16.9444	0	0
2019-10-22	79	44	59.8	26.1111	6.66667	15.4444	0	0
2019-10-23	84	48	66.5	28.8889	8.88889	19.1667	0	0
2019-10-24	85	65	72.7	29.4444	18.3333	22.6111	0.02	0.0508
2019-10-25	84	61	69.1	28.8889	16.1111	20.6111	0	0
2019-10-26	86	57	69.7	30	13.8889	20.9444	0	0
2019-10-27	87	60	71.3	30.5556	15.5556	21.8333	0	0
2019-10-28	85	53	68.4	29.4444	11.6667	20.2222	0	0
2019-10-29	85	60	70	29.4444	15.5556	21.1111	0	0
2019-10-30	87	60	68.6	30.5556	15.5556	20.3333	0	0
2019-10-31	83	56	69.2	28.3333	13.3333	20.6667	0	0
2019-11-01	90	69	76.5	32.2222	20.5556	24.7222	0	0
2019-11-02	87	74	78.5	30.5556	23.3333	25.8333	0.06	0.1524
2019-11-03	83	66	73.8	28.3333	18.8889	23.2222	0	0
2019-11-04	73	69	70.9	22.7778	20.5556	21.6111	0.87	2.2098
2019-11-05	76	64	69.9	24.4444	17.7778	21.0556	0	0
2019-11-06	77	59	65.7	25	15	18.7222	0	0
2019-11-07	74	61	67.5	23.3333	16.1111	19.7222	0.6	1.524
2019-11-08	70	64	67	21.1111	17.7778	19.4444	0.04	0.1016
2019-11-09	66	59	63.6	18.8889	15	17.5556	0.7	1.778
2019-11-10	70	54	62	21.1111	12.2222	16.6667	0.02	0.0508
2019-11-11	74	52	60.9	23.3333	11.1111	16.0556	0	0
2019-11-12	75	53	63.8	23.8889	11.6667	17.6667	0	0
2019-11-13	75	54	63.2	23.8889	12.2222	17.3333	0	0
2019-11-14	81	54	64.4	27.2222	12.2222	18	0	0
2019-11-15	86	52	65.1	30	11.1111	18.3889	0	0
2019-11-16	86	49	66.5	30	9.44444	19.1667	0	0
2019-11-17	83	56	68.5	28.3333	13.3333	20.2778	0	0
2019-11-18	80	53	67.6	26.6667	11.6667	19.7778	0	0
2019-11-19	62	37	50	16.6667	2.77778	10	0	0
2019-11-20	67	33	47.6	19.4444	0.555556	8.66667	0	0
2019-11-21	77	37	58.4	25	2.77778	14.6667	0	0
2019-11-22	78	59	70.8	25.5556	15	21.5556	0	0
2019-11-23	72	47	62.4	22.2222	8.33333	16.8889	0.12	0.3048
2019-11-24	77	42	59	25	5.55556	15	0	0
2019-11-25	65	52	60.3	18.3333	11.1111	15.7222	0.02	0.0508
2019-11-26	70	51	61.3	21.1111	10.5556	16.2778	0	0
2019-11-27	76	51	67	24.4444	10.5556	19.4444	0	0
2019-11-28	80	44	68.8	26.6667	6.66667	20.4444	0	0
2019-11-29	80	44	60.2	26.6667	6.66667	15.6667	0	0
2019-11-30	66	37	54	18.8889	2.77778	12.2222	0	0
2019-12-01	68	33	50.4	20	0.555556	10.2222	0	0
2019-12-02	65	44	55.1	18.3333	6.66667	12.8333	0	0
2019-12-03	52	50	51.2	11.1111	10	10.6667	0.56	1.4224
2019-12-04	53	50	51.6	11.6667	10	10.8889	1.38	3.5052
2019-12-05	54	42	50.5	12.2222	5.55556	10.2778	0.57	1.4478
2019-12-06	60	41	50.2	15.5556	5	10.1111	0.51	1.2954
2019-12-07	55	36	48.1	12.7778	2.22222	8.94444	0	0
2019-12-08	52	37	43.6	11.1111	2.77778	6.44444	0	0
2019-12-09	46	35	39.5	7.77778	1.66667	4.16667	0	0
2019-12-10	54	31	45.9	12.2222	-0.555556	7.72222	0	0
2019-12-11	65	52	57.8	18.3333	11.1111	14.3333	0.01	0.0254
2019-12-12	65	46	52.1	18.3333	7.77778	11.1667	0	0
2019-12-13	78	48	60.1	25.5556	8.88889	15.6111	0	0
2019-12-14	58	41	51.3	14.4444	5	10.7222	0	0
2019-12-15	55	46	50.4	12.7778	7.77778	10.2222	0	0
2019-12-16	66	51	57.5	18.8889	10.5556	14.1667	0	0
2019-12-17	79	37	65.7	26.1111	2.77778	18.7222	0.01	0.0254
2019-12-18	37	27	30.8	2.77778	-2.77778	-0.666667	0.02	0.0508
2019-12-19	44	24	33.8	6.66667	-4.44444	1	0	0
2019-12-20	59	37	47.2	15	2.77778	8.44444	0	0
2019-12-21	70	40	55.7	21.1111	4.44444	13.1667	0	0
2019-12-22	67	46	57.6	19.4444	7.77778	14.2222	0	0
2019-12-23	73	53	61.3	22.7778	11.6667	16.2778	0	0
2019-12-24	78	67	73.2	25.5556	19.4444	22.8889	0.05	0.127
2019-12-25	82	69	73.5	27.7778	20.5556	23.0556	0	0
2019-12-26	85	70	74.2	29.4444	21.1111	23.4444	0	0
2019-12-27	75	59	67.4	23.8889	15	19.6667	0	0
2019-12-28	84	63	71.5	28.8889	17.2222	21.9444	0	0
2019-12-29	70	45	58.7	21.1111	7.22222	14.8333	0	0
2019-12-30	56	48	51.8	13.3333	8.88889	11	0	0
2019-12-31	78	52	61.1	25.5556	11.1111	16.1667	0	0

## Sheet: 2015
Date	Max Temp (°F)	Min Temp (°F)	Avg Temp (°F)	Max Temp (°C)	Min Temp (°C)	Avg Temp (°C)	Total Precipitation (in.)	Total Precipitation (cm)
2019-04-29	75	50	61	23.8889	10	16.1111	0	0
2019-04-30	79	46	63.5	26.1111	7.77778	17.5	0	0
2019-05-01	82	49	66	27.7778	9.44444	18.8889	0	0
2019-05-02	80	50	67	26.6667	10	19.4444	0	0
2019-05-03	82	49	68.8	27.7778	9.44444	20.4444	0	0
2019-05-04	84	60	70.3	28.8889	15.5556	21.2778	0	0
2019-05-05	83	64	71	28.3333	17.7778	21.6667	0	0
2019-05-06	86	71	75.3	30	21.6667	24.0556	1.76	4.4704
2019-05-07	82	72	75.8	27.7778	22.2222	24.3333	0	0
2019-05-08	82	73	76	27.7778	22.7778	24.4444	0	0
2019-05-09	85	70	76.5	29.4444	21.1111	24.7222	0.22	0.5588
2019-05-10	86	75	79.3	30	23.8889	26.2778	0	0
2019-05-11	77	67	70.8	25	19.4444	21.5556	0	0
2019-05-12	68	66	67.3	20	18.8889	19.6111	0.51	1.2954
2019-05-13	69	63	66.3	20.5556	17.2222	19.0556	0.49	1.2446
2019-05-14	85	66	73	29.4444	18.8889	22.7778	1.61	4.0894
2019-05-15	76	64	70.4	24.4444	17.7778	21.3333	0.08	0.2032
2019-05-16	87	66	75.8	30.5556	18.8889	24.3333	0.29	0.7366
2019-05-17	82	64	71.3	27.7778	17.7778	21.8333	0.16	0.4064
2019-05-18	88	71	76.5	31.1111	21.6667	24.7222	2.13	5.4102
2019-05-19	87	73	76.3	30.5556	22.7778	24.6111	0.03	0.0762
2019-05-20	87	71	77.7	30.5556	21.6667	25.3889	0.42	1.0668
2019-05-21	75	63	67	23.8889	17.2222	19.4444	0	0
2019-05-22	78	62	69.1	25.5556	16.6667	20.6111	0.02	0.0508
2019-05-23	85	64	73	29.4444	17.7778	22.7778	0.54	1.3716
2019-05-24	80	62	70.3	26.6667	16.6667	21.2778	1.97	5.0038
2019-05-25	82	67	72.7	27.7778	19.4444	22.6111	0	0
2019-05-26	88	64	73.9	31.1111	17.7778	23.2778	1.78	4.5212
2019-05-27	86	67	74.2	30	19.4444	23.4444	0.01	0.0254
2019-05-28	87	73	77.7	30.5556	22.7778	25.3889	0.19	0.4826
2019-05-29	87	64	73.4	30.5556	17.7778	23	1.12	2.8448
2019-05-30	85	68	74.5	29.4444	20	23.6111	0	0
2019-05-31	83	65	72.2	28.3333	18.3333	22.3333	0.11	0.2794
2019-06-01	86	61	74.4	30	16.1111	23.5556	0	0
2019-06-02	88	65	76.2	31.1111	18.3333	24.5556	0	0
2019-06-03	87	63	76.4	30.5556	17.2222	24.6667	0	0
2019-06-04	88	64	76.8	31.1111	17.7778	24.8889	0	0
2019-06-05	87	63	76.7	30.5556	17.2222	24.8333	0	0
2019-06-06	90	66	78.9	32.2222	18.8889	26.0556	0	0
2019-06-07	89	64	78.3	31.6667	17.7778	25.7222	0	0
2019-06-08	91	67	79.6	32.7778	19.4444	26.4444	0	0
2019-06-09	93	68	81.7	33.8889	20	27.6111	0	0
2019-06-10	91	70	80.5	32.7778	21.1111	26.9444	0	0
2019-06-11	92	71	81	33.3333	21.6667	27.2222	0	0
2019-06-12	93	73	81.1	33.8889	22.7778	27.2778	0	0
2019-06-13	93	73	80.8	33.8889	22.7778	27.1111	0.01	0.0254
2019-06-14	86	71	76.1	30	21.6667	24.5	0.05	0.127
2019-06-15	89	71	77.1	31.6667	21.6667	25.0556	0.38	0.9652
2019-06-16	81	73	75.7	27.2222	22.7778	24.2778	0.27	0.6858
2019-06-17	86	73	79.1	30	22.7778	26.1667	1.14	2.8956
2019-06-18	87	72	77.3	30.5556	22.2222	25.1667	0	0
2019-06-19	84	72	76.6	28.8889	22.2222	24.7778	0	0
2019-06-20	84	72	77.1	28.8889	22.2222	25.0556	0.21	0.5334
2019-06-21	86	70	77.2	30	21.1111	25.1111	0.01	0.0254
2019-06-22	87	71	78.7	30.5556	21.6667	25.9444	0.16	0.4064
2019-06-23	91	71	80	32.7778	21.6667	26.6667	0	0
2019-06-24	90	71	78.6	32.2222	21.6667	25.8889	0.01	0.0254
2019-06-25	89	69	79.9	31.6667	20.5556	26.6111	0	0
2019-06-26	91	74	80.8	32.7778	23.3333	27.1111	0	0
2019-06-27	89	75	79.7	31.6667	23.8889	26.5	0	0
2019-06-28	89	73	78.9	31.6667	22.7778	26.0556	0.01	0.0254
2019-06-29	91	71	81	32.7778	21.6667	27.2222	0.33	0.8382
2019-06-30	91	72	77.7	32.7778	22.2222	25.3889	0	0
2019-07-01	87	66	76.7	30.5556	18.8889	24.8333	0.63	1.6002
2019-07-02	89	69	77.1	31.6667	20.5556	25.0556	0.01	0.0254
2019-07-03	90	73	79.2	32.2222	22.7778	26.2222	0	0
2019-07-04	89	73	80.5	31.6667	22.7778	26.9444	0	0
2019-07-05	90	73	80.6	32.2222	22.7778	27	0	0
2019-07-06	92	76	81.9	33.3333	24.4444	27.7222	0	0
2019-07-07	92	77	81.9	33.3333	25	27.7222	0	0
2019-07-08	90	77	81.5	32.2222	25	27.5	0	0
2019-07-09	92	72	81.5	33.3333	22.2222	27.5	0	0
2019-07-10	93	67	78.5	33.8889	19.4444	25.8333	0	0
2019-07-11	92	66	77.7	33.3333	18.8889	25.3889	0	0
2019-07-12	93	70	80.4	33.8889	21.1111	26.8889	0	0
2019-07-13	94	72	81.8	34.4444	22.2222	27.6667	0	0
2019-07-14	94	73	81.8	34.4444	22.7778	27.6667	0	0
2019-07-15	94	71	81.5	34.4444	21.6667	27.5	0	0
2019-07-16	94	69	80.3	34.4444	20.5556	26.8333	0	0
2019-07-17	95	75	82.6	35	23.8889	28.1111	0	0
2019-07-18	95	74	84.3	35	23.3333	29.0556	0	0
2019-07-19	95	74	83.6	35	23.3333	28.6667	0	0
2019-07-20	96	68	82.5	35.5556	20	28.0556	0	0
2019-07-21	95	73	83.6	35	22.7778	28.6667	0	0
2019-07-22	95	76	84.2	35	24.4444	29	0	0
2019-07-23	97	74	83.7	36.1111	23.3333	28.7222	0	0
2019-07-24	97	73	83.7	36.1111	22.7778	28.7222	0	0
2019-07-25	96	69	82.1	35.5556	20.5556	27.8333	0	0
2019-07-26	96	70	82.9	35.5556	21.1111	28.2778	0	0
2019-07-27	97	74	83.9	36.1111	23.3333	28.8333	0	0
2019-07-28	98	73	82.7	36.6667	22.7778	28.1667	0	0
2019-07-29	97	71	83.4	36.1111	21.6667	28.5556	0	0
2019-07-30	100	70	85.8	37.7778	21.1111	29.8889	0	0
2019-07-31	100	78	88.8	37.7778	25.5556	31.5556	0	0
2019-08-01	96	69	82.4	35.5556	20.5556	28	0	0
2019-08-02	97	67	83.5	36.1111	19.4444	28.6111	0	0
2019-08-03	96	69	84	35.5556	20.5556	28.8889	0	0
2019-08-04	97	72	85.7	36.1111	22.2222	29.8333	0	0
2019-08-05	99	77	85.2	37.2222	25	29.5556	0	0
2019-08-06	99	74	85.3	37.2222	23.3333	29.6111	0	0
2019-08-07	98	74	85	36.6667	23.3333	29.4444	0	0
2019-08-08	100	75	85.3	37.7778	23.8889	29.6111	0	0
2019-08-09	101	74	84.8	38.3333	23.3333	29.3333	0	0
2019-08-10	101	71	85.2	38.3333	21.6667	29.5556	0	0
2019-08-11	102	69	87.5	38.8889	20.5556	30.8333	0	0
2019-08-12	101	74	88.1	38.3333	23.3333	31.1667	0	0
2019-08-13	101	75	88	38.3333	23.8889	31.1111	0	0
2019-08-14	99	74	87	37.2222	23.3333	30.5556	0	0
2019-08-15	95	74	85	35	23.3333	29.4444	0	0
2019-08-16	96	71	82.5	35.5556	21.6667	28.0556	0.02	0.0508
2019-08-17	94	70	80.3	34.4444	21.1111	26.8333	0	0
2019-08-18	97	73	84.2	36.1111	22.7778	29	0.06	0.1524
2019-08-19	96	77	84.3	35.5556	25	29.0556	0	0
2019-08-20	82	71	76.8	27.7778	21.6667	24.8889	0	0
2019-08-21	90	71	77.4	32.2222	21.6667	25.2222	0.39	0.9906
2019-08-22	97	74	83.7	36.1111	23.3333	28.7222	0.16	0.4064
2019-08-23	98	73	84.9	36.6667	22.7778	29.3889	0	0
2019-08-24	98	72	85.1	36.6667	22.2222	29.5	0	0
2019-08-25	97	72	83.3	36.1111	22.2222	28.5	0	0
2019-08-26	94	70	82	34.4444	21.1111	27.7778	0	0
2019-08-27	95	70	81.7	35	21.1111	27.6111	0	0
2019-08-28	95	64	80.2	35	17.7778	26.7778	0	0
2019-08-29	93	66	80.4	33.8889	18.8889	26.8889	0	0
2019-08-30	92	71	81	33.3333	21.6667	27.2222	0	0
2019-08-31	94	68	79.4	34.4444	20	26.3333	0	0
2019-09-01	90	70	78.1	32.2222	21.1111	25.6111	0.11	0.2794
2019-09-02	92	65	75.6	33.3333	18.3333	24.2222	0.03	0.0762
2019-09-03	92	68	79.4	33.3333	20	26.3333	0	0
2019-09-04	96	73	81.6	35.5556	22.7778	27.5556	0	0
2019-09-05	98	74	83.9	36.6667	23.3333	28.8333	0	0
2019-09-06	96	73	84.1	35.5556	22.7778	28.9444	0	0
2019-09-07	98	72	84.4	36.6667	22.2222	29.1111	0	0
2019-09-08	97	75	83.3	36.1111	23.8889	28.5	0	0
2019-09-09	92	73	81.1	33.3333	22.7778	27.2778	0	0
2019-09-10	96	74	79.1	35.5556	23.3333	26.1667	0.07	0.1778
2019-09-11	90	73	78	32.2222	22.7778	25.5556	2.12	5.3848
2019-09-12	89	64	75.9	31.6667	17.7778	24.3889	0.26	0.6604
2019-09-13	89	59	74.1	31.6667	15	23.3889	0	0
2019-09-14	89	59	74.7	31.6667	15	23.7222	0	0
2019-09-15	91	69	78.4	32.7778	20.5556	25.7778	0	0
2019-09-16	91	73	79.6	32.7778	22.7778	26.4444	0	0
2019-09-17	94	74	80.1	34.4444	23.3333	26.7222	0.02	0.0508
2019-09-18	95	72	81.3	35	22.2222	27.3889	0	0
2019-09-19	92	69	79.5	33.3333	20.5556	26.3889	0	0
2019-09-20	92	64	77.8	33.3333	17.7778	25.4444	0	0
2019-09-21	94	70	81.1	34.4444	21.1111	27.2778	0	0
2019-09-22	94	66	80.2	34.4444	18.8889	26.7778	0	0
2019-09-23	92	63	76.8	33.3333	17.2222	24.8889	0	0
2019-09-24	92	63	77	33.3333	17.2222	25	0	0
2019-09-25	92	68	77.1	33.3333	20	25.0556	0	0
2019-09-26	92	65	77	33.3333	18.3333	25	1.15	2.921
2019-09-27	92	63	76.9	33.3333	17.2222	24.9444	0	0
2019-09-28	86	66	75.3	30	18.8889	24.0556	0	0
2019-09-29	92	65	77.1	33.3333	18.3333	25.0556	0	0
2019-09-30	93	67	78.6	33.8889	19.4444	25.8889	0	0
2019-10-01	92	66	78.2	33.3333	18.8889	25.6667	0	0
2019-10-02	86	64	74.7	30	17.7778	23.7222	0	0
2019-10-03	83	51	67.3	28.3333	10.5556	19.6111	0	0
2019-10-04	85	54	69.3	29.4444	12.2222	20.7222	0	0
2019-10-05	84	63	72.1	28.8889	17.2222	22.2778	0	0
2019-10-06	87	58	70.9	30.5556	14.4444	21.6111	0	0
2019-10-07	89	59	74.2	31.6667	15	23.4444	0	0
2019-10-08	88	64	76.8	31.1111	17.7778	24.8889	0	0
2019-10-09	87	68	76.2	30.5556	20	24.5556	0	0
2019-10-10	88	66	75	31.1111	18.8889	23.8889	0	0
2019-10-11	93	61	77.3	33.8889	16.1111	25.1667	0	0
2019-10-12	97	71	82.2	36.1111	21.6667	27.8889	0	0
2019-10-13	92	57	78.2	33.3333	13.8889	25.6667	0	0
2019-10-14	95	54	72.1	35	12.2222	22.2778	0	0
2019-10-15	93	54	71.3	33.8889	12.2222	21.8333	0	0
2019-10-16	89	54	70.2	31.6667	12.2222	21.2222	0	0
2019-10-17	86	55	68.9	30	12.7778	20.5	0	0
2019-10-18	83	47	65	28.3333	8.33333	18.3333	0	0
2019-10-19	85	45	66.4	29.4444	7.22222	19.1111	0	0
2019-10-20	86	48	69.5	30	8.88889	20.8333	0	0
2019-10-21	87	72	77.5	30.5556	22.2222	25.2778	0	0
2019-10-22	84	70	75.5	28.8889	21.1111	24.1667	0.04	0.1016
2019-10-23	80	71	75.6	26.6667	21.6667	24.2222	0.06	0.1524
2019-10-24	77	61	67.9	25	16.1111	19.9444	3.14	7.9756
2019-10-25	64	58	61.7	17.7778	14.4444	16.5	4.16	10.5664
2019-10-26	78	58	66.7	25.5556	14.4444	19.2778	0.15	0.381
2019-10-27	84	54	67.3	28.8889	12.2222	19.6111	0	0
2019-10-28	81	52	65.8	27.2222	11.1111	18.7778	0	0
2019-10-29	81	48	65.6	27.2222	8.88889	18.6667	0	0
2019-10-30	77	66	72	25	18.8889	22.2222	0.29	0.7366
2019-10-31	75	64	70.2	23.8889	17.7778	21.2222	0	0
2019-11-01	75	59	65.2	23.8889	15	18.4444	0	0
2019-11-02	81	50	60.8	27.2222	10	16	0	0
2019-11-03	81	55	64.9	27.2222	12.7778	18.2778	0	0
2019-11-04	80	55	67.1	26.6667	12.7778	19.5	0	0
2019-11-05	85	73	78	29.4444	22.7778	25.5556	0	0
2019-11-06	75	62	67.3	23.8889	16.6667	19.6111	0	0
2019-11-07	63	57	59.7	17.2222	13.8889	15.3889	0.15	0.381
2019-11-08	68	53	58.4	20	11.6667	14.6667	0.24	0.6096
2019-11-09	73	50	61	22.7778	10	16.1111	0	0
2019-11-10	75	56	68.7	23.8889	13.3333	20.3889	0	0
2019-11-11	87	65	76.4	30.5556	18.3333	24.6667	0	0
2019-11-12	70	56	62	21.1111	13.3333	16.6667	0	0
2019-11-13	65	57	60.9	18.3333	13.8889	16.0556	0	0
2019-11-14	66	55	58.2	18.8889	12.7778	14.5556	0	0
2019-11-15	72	52	62.5	22.2222	11.1111	16.9444	0.02	0.0508
2019-11-16	75	66	71.5	23.8889	18.8889	21.9444	0	0
2019-11-17	75	44	60.8	23.8889	6.66667	16	0.04	0.1016
2019-11-18	72	39	54.6	22.2222	3.88889	12.5556	0.31	0.7874
2019-11-19	76	41	57.3	24.4444	5	14.0556	0	0
2019-11-20	76	43	60.5	24.4444	6.11111	15.8333	0	0
2019-11-21	65	39	57.6	18.3333	3.88889	14.2222	0	0
2019-11-22	55	32	42.7	12.7778	0	5.94444	0	0
2019-11-23	63	28	45.9	17.2222	-2.22222	7.72222	0	0
2019-11-24	66	45	57.1	18.8889	7.22222	13.9444	0	0
2019-11-25	76	60	68.3	24.4444	15.5556	20.1667	0.01	0.0254
2019-11-26	75	69	71.8	23.8889	20.5556	22.1111	0	0
2019-11-27	76	42	61.8	24.4444	5.55556	16.5556	0.42	1.0668
2019-11-28	45	41	43.1	7.22222	5	6.16667	0.21	0.5334
2019-11-29	47	43	44.8	8.33333	6.11111	7.11111	0.04	0.1016
2019-11-30	54	46	49.7	12.2222	7.77778	9.83333	0.01	0.0254
2019-12-01	57	47	51.3	13.8889	8.33333	10.7222	0	0
2019-12-02	67	40	51.6	19.4444	4.44444	10.8889	0	0
2019-12-03	63	35	46	17.2222	1.66667	7.77778	0	0
2019-12-04	62	34	45.5	16.6667	1.11111	7.5	0	0
2019-12-05	65	31	46.5	18.3333	-0.555556	8.05556	0	0
2019-12-06	69	39	51.1	20.5556	3.88889	10.6111	0	0
2019-12-07	68	37	49.4	20	2.77778	9.66667	0	0
2019-12-08	75	35	55	23.8889	1.66667	12.7778	0	0
2019-12-09	74	44	56.9	23.3333	6.66667	13.8333	0	0
2019-12-10	78	48	63.6	25.5556	8.88889	17.5556	0	0
2019-12-11	80	48	64.3	26.6667	8.88889	17.9444	0	0
2019-12-12	75	71	72.7	23.8889	21.6667	22.6111	0	0
2019-12-13	75	50	54.8	23.8889	10	12.6667	1.2	3.048
2019-12-14	74	42	56.2	23.3333	5.55556	13.4444	0.01	0.0254
2019-12-15	75	46	64.1	23.8889	7.77778	17.8333	0	0
2019-12-16	63	39	55.5	17.2222	3.88889	13.0556	0	0
2019-12-17	65	35	49	18.3333	1.66667	9.44444	0	0
2019-12-18	56	31	43.3	13.3333	-0.555556	6.27778	0	0
2019-12-19	66	28	47.8	18.8889	-2.22222	8.77778	0	0
2019-12-20	68	47	60.1	20	8.33333	15.6111	0	0
2019-12-21	73	51	63	22.7778	10.5556	17.2222	0	0
2019-12-22	77	40	62.4	25	4.44444	16.8889	0	0
2019-12-23	82	50	67.1	27.7778	10	19.5	0	0
2019-12-24	73	46	61.2	22.7778	7.77778	16.2222	0	0
2019-12-25	72	52	61	22.2222	11.1111	16.1111	0	0
2019-12-26	78	73	74.8	25.5556	22.7778	23.7778	0.01	0.0254
2019-12-27	75	38	50.7	23.8889	3.33333	10.3889	0.2	0.508
2019-12-28	46	36	40.2	7.77778	2.22222	4.55556	0.8	2.032
2019-12-29	50	36	43.6	10	2.22222	6.44444	0	0
2019-12-30	54	38	47.1	12.2222	3.33333	8.38889	0.07	0.1778
2019-12-31	53	37	46.4	11.6667	2.77778	8	0	0

## Sheet: Weather Station Information
Weather Station "Country Estates" - KTXSANMA33					Accessed from :
Elevation 778 ft					https://www.wunderground.com/history/monthly/us/tx/san-marcos/KTXSANMA33/date/2015-4
29.92 °N	97.97 °W
